# Supplementary material for: The Pathway Coexpression Network: Revealing pathway relationships
Source: PubMed Central journal article supplement (PMC5875878; doi:10.1371/journal.pcbi.1006042), 2018-03-19
Supplement: pcbi.1006042.s001.pdf [file pcbi.1006042.s001.pdf]

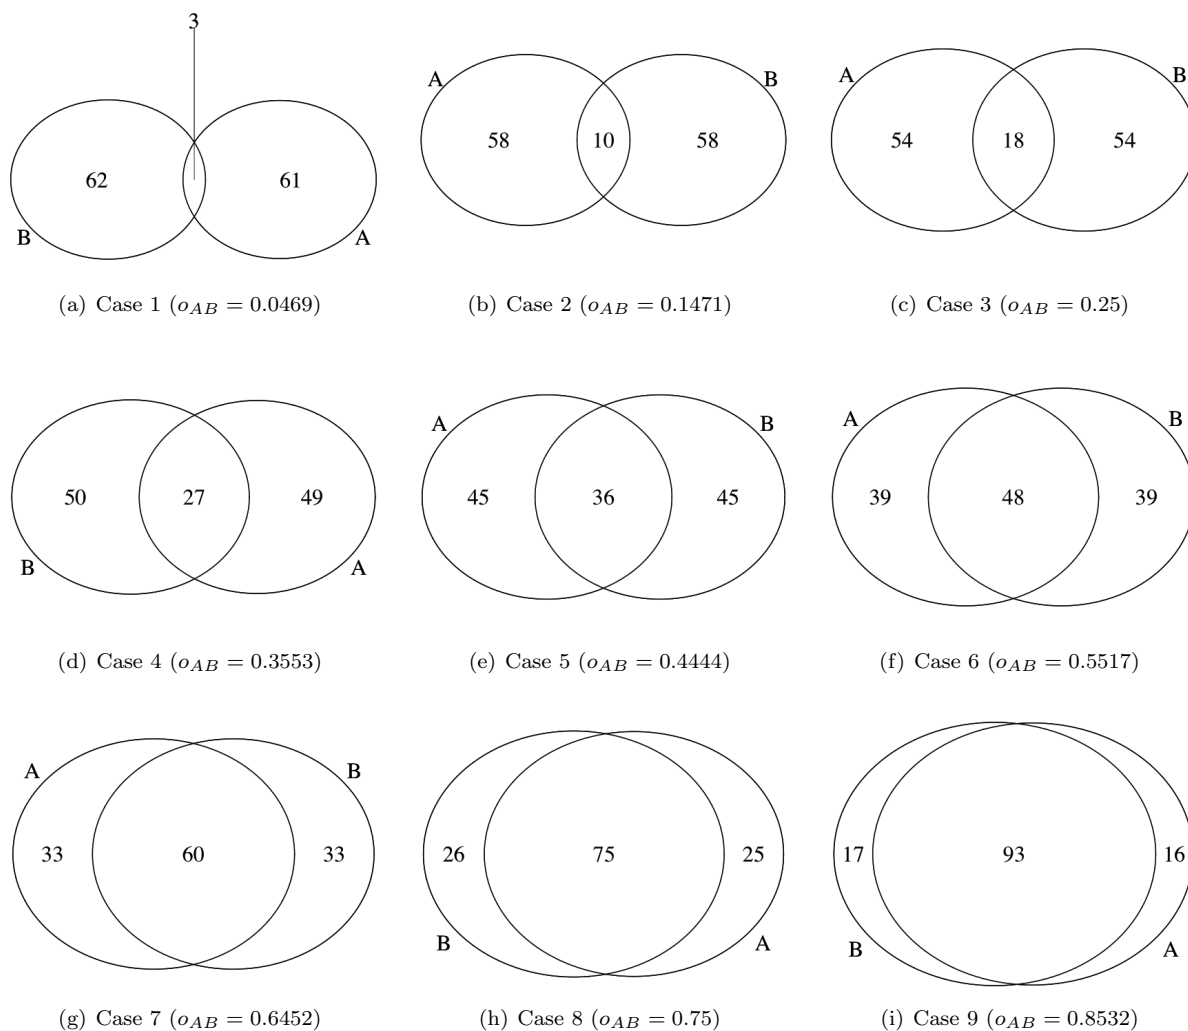

**Figure S1. Venn Diagrams for No Overlap and Overlap Cases of the Ribosome Gene Sets.** Venn diagrams between the partitions used to separate the (KEGG) Ribosome pathway and random genes into gene sets with different degrees of shared genes.
