# Supplementary material for: The Pathway Coexpression Network: Revealing pathway relationships
Source: PLoS Comput Biol. 2018 Mar 19;14(3):e1006042. doi: 10.1371/journal.pcbi.1006042 (PMC5875878; doi:10.1371/journal.pcbi.1006042)
Supplement: S1 Table — (XLSX) [file pcbi.1006042.s004.xlsx]

## Sheet: barcode_samples.csv
GSM	GSE	Tissue	Clinical Group
GSM101095	GSE4498;GSE5058;GSE5060;GSE7832;GSE8545	bronchial_epithelial_cells	Age: 41;Sex: M;Ethnic group: black;Smoking Status: non-smoker
GSM101096	GSE4498;GSE5058;GSE5060;GSE7832;GSE8545	bronchial_epithelial_cells	Age: 35;Sex: M;Ethnic group: black;Smoking Status: non-smoker
GSM101097	GSE4498;GSE5058;GSE5060;GSE7832;GSE8545	bronchial_epithelial_cells	Age: 61;Sex: M;Ethnic group: white;Smoking Status: non-smoker
GSM101098	GSE4498;GSE5058;GSE5060;GSE7832;GSE8545	bronchial_epithelial_cells	Age: 37;Sex: F;Ethnic group: black;Smoking Status: non-smoker
GSM101099	GSE4498;GSE5058;GSE5060;GSE7832	bronchial_epithelial_cells	Age: 45;Sex: M;Ethnic group: hispanic;Smoking Status: non-smoker
GSM101100	GSE4498;GSE5058;GSE5060;GSE7832;GSE8545	bronchial_epithelial_cells	Age: 47;Sex: M;Ethnic group: black;Smoking Status: non-smoker
GSM101101	GSE4498;GSE5058;GSE5060;GSE7832;GSE8545	bronchial_epithelial_cells	Age: 38;Sex: M;Ethnic group: hispanic;Smoking Status: non-smoker
GSM101102	GSE4498;GSE5058;GSE5060;GSE7832;GSE8545	bronchial_epithelial_cells	Age: 49;Sex: F;Ethnic group: white;Smoking Status: non-smoker
GSM101103	GSE4498;GSE5058;GSE5060;GSE7832;GSE8545	bronchial_epithelial_cells	Age: 45;Sex: M;Ethnic group: white;Smoking Status: non-smoker
GSM101104	GSE4498;GSE5058;GSE5060;GSE7832;GSE8545	bronchial_epithelial_cells	Age: 36;Sex: M;Ethnic group: white;Smoking Status: non-smoker
GSM101105	GSE4498;GSE5058;GSE5060;GSE7832;GSE8545	bronchial_epithelial_cells	Age: 38;Sex: M;Ethnic group: black;Smoking Status: non-smoker
GSM101106	GSE4498;GSE5058;GSE5060;GSE7832;GSE8545	bronchial_epithelial_cells	Age: 35;Sex: M;Ethnic group: black;Smoking Status: non-smoker
GSM1012177	GSE22619	colonic_mucosa	twin pair: #2;individual: healthy individual, non-inflamed;tissue: primary mucosal tissue, colon;mean age: 31.5
GSM1012179	GSE22619	colonic_mucosa	twin pair: #3;individual: healthy individual, non-inflamed;tissue: primary mucosal tissue, colon;mean age: 31.5
GSM1014798	GSE41328	colon	AFX platform, lab 1, matched normal colon tissue, biological rep 1
GSM1014799	GSE41328	colon	AFX platform, lab 1, matched normal colon tissue, biological rep 2
GSM1014800	GSE41328	colon	AFX platform, lab 1, matched normal colon tissue, biological rep 3
GSM1014801	GSE41328	colon	AFX platform, lab 1, matched normal colon tissue, biological rep 4
GSM1014802	GSE41328	colon	AFX platform, lab 1, matched normal colon tissue, biological rep 5
GSM1016021	GSE41386	myometrium	NA
GSM1016022	GSE41386	myometrium	NA
GSM1016023	GSE41386	myometrium	NA
GSM103559	GSE5110	skeletal_muscle	NA
GSM103560	GSE5110	skeletal_muscle	NA
GSM103563	GSE5110	skeletal_muscle	NA
GSM103564	GSE5110	skeletal_muscle	NA
GSM103565	GSE5110	skeletal_muscle	NA
GSM1047773	GSE42672	fibroblasts	tu-vs-nl: cancer;age@dx: 54;gender: Male;smoking status: Current;oc vs. op: Oral cavity;t stage: 4;cn stage: 0;pn stage: 1;dm?: 0;ecs: Y;treatment*: S, cRT;dxdate: 15-Jan-03;txdate: 29-Jan-03;localrecur: 0;nodalrecur: 0;dm?: ?;survivallastfollowup: Dead, unknown disease status;vital: Dead-unknown;lastfudt: 9-Jan-04;futime: 359;ajcc4: 4;ajcc2: 1;osccdeath: 0;alldeath: 1
GSM1049106	GSE42743	oral_tissue	tu-vs-nl: cancer;age@dx: 62;gender: Male;smoking status: Former;oc vs. op: Oral cavity;t stage: 2;cn stage: 1;pn stage: 0;dm?: 0;ecs: N;treatment*: S;dxdate: 7-Sep-06;txdate: 4-Oct-06;localrecur: 0;locrecurdt: 24-Jan-07;nodalrecur: 1;nodrecurdt: 24-Jan-07;dm?: 0;survivallastfollowup: Dead, due to disease;vital: Dead-OSCC;lastfudt: 12-Oct-06;futime: 35;ajcc4: 2;ajcc2: 0;osccdeath: 1;alldeath: 1
GSM1049108	GSE42743	oral_tissue	tu-vs-nl: cancer;age@dx: 58;gender: Male;smoking status: NeverSmoker;oc vs. op: Oral cavity;t stage: 2;cn stage: 0;pn stage: 0;dm?: 0;ecs: N;treatment*: S, RT;dxdate: 25-Sep-06;txdate: 6-Oct-06;localrecur: 0;nodalrecur: 1;nodrecurdt: 22-May-07;dm?: 1;dm date?: 4-Dec-07;survivallastfollowup: Dead, due to disease;vital: Dead-OSCC;lastfudt: 11-Nov-08;futime: 778;ajcc4: 2;ajcc2: 0;osccdeath: 1;alldea…
GSM1049110	GSE42743	oral_tissue	tu-vs-nl: cancer;age@dx: 75;gender: Male;smoking status: Former;oc vs. op: Oral cavity;t stage: 2;cn stage: 0;pn stage: 2B;dm?: 0;ecs: N;treatment*: S, RT;dxdate: 23-Oct-00;txdate: 1-Nov-00;localrecur: ?;nodalrecur: ?;dm?: ?;survivallastfollowup: Dead, unknown disease status;vital: Dead-unknown;lastfudt: 3-Apr-01;futime: 162;ajcc4: 4;ajcc2: 1;osccdeath: 0;alldeath: 1
GSM1049112	GSE42743	oral_tissue	tu-vs-nl: normal;age@dx: 76;gender: Male;smoking status: Former;oc vs. op: Oral cavity;t stage: 3;cn stage: 2b;pn stage: 2B;dm?: 0;ecs: Y;treatment*: S;dxdate: 16-Oct-00;txdate: 9-Nov-00;localrecur: 0;nodalrecur: 0;dm?: 0;survivallastfollowup: Died, due to treatment of disease;vital: .;lastfudt: 11-Nov-00;futime: 26;ajcc4: 4;ajcc2: 1;osccdeath: 0;alldeath: 1
GSM1049113	GSE42743	oral_tissue	tu-vs-nl: cancer;age@dx: 44;gender: Female;smoking status: Former;oc vs. op: Oral cavity;t stage: 2;cn stage: 0;pn stage: 2B;dm?: 0;ecs: Y;treatment*: S, RT;dxdate: 27-Nov-00;txdate: 1-Dec-00;localrecur: 0;nodalrecur: 0;dm?: 0;survivallastfollowup: Living NED;vital: Alive;lastfudt: 4-Apr-01;futime: 128;ajcc4: 4;ajcc2: 1;osccdeath: 0;alldeath: 0
GSM1049115	GSE42743	oral_tissue	tu-vs-nl: cancer;age@dx: 75;gender: Male;smoking status: Former;oc vs. op: Oral cavity;t stage: 3;cn stage: 0;pn stage: 2B;dm?: 0;ecs: N;treatment*: S, RT;dxdate: 21-Dec-00;txdate: 5-Jan-01;localrecur: 0;nodalrecur: 0;dm?: 0;survivallastfollowup: Living NED;vital: Alive;lastfudt: 13-Jan-03;futime: 753;ajcc4: 4;ajcc2: 1;osccdeath: 0;alldeath: 0
GSM1049118	GSE42743	oral_tissue	tu-vs-nl: cancer;age@dx: 54;gender: Male;smoking status: Former;oc vs. op: Oral cavity;t stage: 2;cn stage: 0;pn stage: 0;dm?: 0;ecs: N;treatment*: S, RT;dxdate: 5-Jul-00;txdate: 10-Jul-00;localrecur: 0;nodalrecur: 0;dm?: 0;survivallastfollowup: Living NED;vital: Alive;lastfudt: 4-Apr-02;futime: 638;ajcc4: 2;ajcc2: 0;osccdeath: 0;alldeath: 0
GSM1049123	GSE42743	oral_tissue	tu-vs-nl: cancer;age@dx: 41;gender: Male;smoking status: Current;oc vs. op: Oral cavity;t stage: 1;cn stage: 0;pn stage: 0;dm?: 0;ecs: N;treatment*: S, RT;dxdate: 3-Apr-01;txdate: 19-Apr-01;localrecur: 0;nodalrecur: 0;dm?: 0;survivallastfollowup: Living NED;vital: Alive;lastfudt: 30-Jan-04;futime: 1032;ajcc4: 1;ajcc2: 0;osccdeath: 0;alldeath: 0
GSM1049126	GSE42743	oral_tissue	tu-vs-nl: normal;age@dx: 67;gender: Female;smoking status: Former;oc vs. op: Oral cavity;t stage: 2;cn stage: 0;pn stage: 0;dm?: 0;ecs: N;treatment*: S;dxdate: 14-May-01;txdate: 7-Jun-01;localrecur: 0;nodalrecur: 1;nodrecurdt: 10-Dec-01;dm?: 1;dm date?: 28-May-02;survivallastfollowup: Dead with Disease;vital: .;lastfudt: 28-May-02;futime: 379;ajcc4: 2;ajcc2: 0;osccdeath: 0;alldeath: 1
GSM1049127	GSE42743	oral_tissue	tu-vs-nl: cancer;age@dx: 67;gender: Female;smoking status: Former;oc vs. op: Oral cavity;t stage: 2;cn stage: 0;pn stage: 0;dm?: 0;ecs: N;treatment*: S;dxdate: 14-May-01;txdate: 7-Jun-01;localrecur: 0;nodalrecur: 1;nodrecurdt: 10-Dec-01;dm?: 1;dm date?: 28-May-02;survivallastfollowup: Dead with Disease;vital: Dead-OSCC;lastfudt: 28-May-02;futime: 379;ajcc4: 2;ajcc2: 0;osccdeath: 1;alldeath: 1
GSM1049130	GSE42743	oral_tissue	tu-vs-nl: cancer;age@dx: 62;gender: Male;smoking status: Former;oc vs. op: Oral cavity;t stage: 2;cn stage: 0;pn stage: 1;dm?: 0;ecs: Y;treatment*: Surgery;dxdate: 17-Jul-01;txdate: 2-Aug-01;localrecur: ?;nodalrecur: ?;dm?: ?;survivallastfollowup: Dead, unknown disease status;vital: Dead-unknown;lastfudt: 7-Aug-01;futime: 21;ajcc4: 3;ajcc2: 1;osccdeath: 0;alldeath: 1
GSM1049132	GSE42743	oral_tissue	tu-vs-nl: cancer;age@dx: 55;gender: Male;smoking status: Former;oc vs. op: Oral cavity;t stage: 4;cn stage: 0;pn stage: 0;dm?: 0;ecs: N;treatment*: S, RT;dxdate: 21-Aug-06;txdate: 28-Sep-06;localrecur: 0;nodalrecur: 0;dm?: 0;survivallastfollowup: Living NED;vital: Alive;lastfudt: 15-Dec-08;futime: 847;ajcc4: 4;ajcc2: 1;osccdeath: 0;alldeath: 0
GSM1049135	GSE42743	oral_tissue	tu-vs-nl: cancer;age@dx: 48;gender: Male;smoking status: NeverSmoker;oc vs. op: Oral cavity;t stage: 3;cn stage: 1;pn stage: 0;dm?: 0;ecs: N;treatment*: S;dxdate: 4-Jan-99;txdate: 28-Jan-99;localrecur: ?;nodalrecur: 1;nodrecurdt: 11-May-99;dm?: 0;survivallastfollowup: Dead with Disease;vital: Dead-OSCC;lastfudt: 24-Sep-99;futime: 263;ajcc4: 3;ajcc2: 1;osccdeath: 1;alldeath: 1
GSM1049138	GSE42743	oral_tissue	tu-vs-nl: cancer;age@dx: 43;gender: Male;smoking status: Current;oc vs. op: Oral cavity;t stage: 3;cn stage: 0;pn stage: 1;dm?: 0;ecs: N;treatment*: S, RT;dxdate: 12-Mar-99;txdate: 6-Apr-99;localrecur: 0;nodalrecur: 0;dm?: 0;survivallastfollowup: Living NED;vital: Alive;lastfudt: 18-Jan-01;futime: 678;ajcc4: 3;ajcc2: 1;osccdeath: 0;alldeath: 0
GSM1049140	GSE42743	oral_tissue	tu-vs-nl: cancer;age@dx: 66;gender: Male;smoking status: Current;oc vs. op: Oral cavity;t stage: 4;cn stage: 2c;pn stage: 2C;dm?: 0;ecs: Y;treatment*: S, RT;dxdate: 17-Aug-99;txdate: 3-Sep-99;localrecur: 0;nodalrecur: 0;dm?: ?;survivallastfollowup: Dead with Disease;vital: Dead-OSCC;lastfudt: 23-Feb-01;futime: 556;ajcc4: 4;ajcc2: 1;osccdeath: 1;alldeath: 1
GSM1049142	GSE42743	oral_tissue	tu-vs-nl: cancer;age@dx: 58;gender: Male;smoking status: Current;oc vs. op: Oral cavity;t stage: 3;cn stage: 1;pn stage: 2B;dm?: 0;ecs: Y;treatment*: S, RT;dxdate: 1-Sep-99;txdate: 18-Oct-99;localrecur: 0;nodalrecur: 0;dm?: ?;survivallastfollowup: Dead with Disease;vital: Dead-OSCC;lastfudt: 11-Feb-00;futime: 163;ajcc4: 4;ajcc2: 1;osccdeath: 1;alldeath: 1
GSM1049144	GSE42743	oral_tissue	tu-vs-nl: cancer;age@dx: 71;gender: Male;smoking status: Current;oc vs. op: Oral cavity;t stage: 3;cn stage: 1;pn stage: 2B;dm?: 0;ecs: Y;treatment*: S, RT;dxdate: 2-Nov-99;txdate: 24-Nov-99;localrecur: 1;locrecurdt: 22-Jan-02;nodalrecur: 0;dm?: ?;survivallastfollowup: Dead with Disease;vital: Dead-OSCC;lastfudt: 22-Jan-02;futime: 812;ajcc4: 4;ajcc2: 1;osccdeath: 1;alldeath: 1
GSM1049148	GSE42743	oral_tissue	tu-vs-nl: cancer;age@dx: 74;gender: Female;smoking status: NeverSmoker;oc vs. op: Oral cavity;t stage: 2;cn stage: 0;pn stage: 0;dm?: 0;ecs: N;treatment*: S;dxdate: 31-Jan-00;txdate: 4-Feb-00;localrecur: 0;nodalrecur: 0;dm?: 0;survivallastfollowup: Living NED;vital: Alive;lastfudt: 9-Jul-02;futime: 890;ajcc4: 2;ajcc2: 0;osccdeath: 0;alldeath: 0
GSM1049152	GSE42743	oral_tissue	tu-vs-nl: normal;age@dx: 64;gender: Male;smoking status: Current;oc vs. op: Oral cavity;t stage: 2;cn stage: 1;pn stage: 0;dm?: 0;ecs: N;treatment*: S;dxdate: 5-Nov-96;txdate: 20-Nov-96;localrecur: 0;nodalrecur: 0;dm?: 0;survivallastfollowup: Living NED;vital: .;lastfudt: 27-Sep-01;futime: 1787;ajcc4: 2;ajcc2: 0;osccdeath: 0;alldeath: 1
GSM1049153	GSE42743	oral_tissue	tu-vs-nl: normal;age@dx: 77;gender: Male;smoking status: NeverSmoker;oc vs. op: Oral cavity;t stage: 3;cn stage: 1;pn stage: 1;dm?: 0;ecs: N;treatment*: S, RT;dxdate: 1-Apr-97;txdate: 16-Apr-97;localrecur: ?;nodalrecur: ?;dm?: ?;survivallastfollowup: Dead, unknown disease status;vital: .;lastfudt: 16-Dec-97;futime: 259;ajcc4: 3;ajcc2: 1;osccdeath: 0;alldeath: 1
GSM1049154	GSE42743	oral_tissue	tu-vs-nl: cancer;age@dx: 77;gender: Male;smoking status: NeverSmoker;oc vs. op: Oral cavity;t stage: 3;cn stage: 1;pn stage: 1;dm?: 0;ecs: N;treatment*: S, RT;dxdate: 1-Apr-97;txdate: 16-Apr-97;localrecur: ?;nodalrecur: ?;dm?: ?;survivallastfollowup: Dead, unknown disease status;vital: Dead-unknown;lastfudt: 16-Dec-97;futime: 259;ajcc4: 3;ajcc2: 1;osccdeath: 0;alldeath: 1
GSM1049157	GSE42743	oral_tissue	tu-vs-nl: cancer;age@dx: 65;gender: Female;smoking status: Current;oc vs. op: Oral cavity;t stage: 4;cn stage: 2;pn stage: 2C;dm?: 0;ecs: Y;treatment*: S;dxdate: 10-Mar-98;txdate: 24-Jun-98;localrecur: 0;nodalrecur: 0;dm?: 0;survivallastfollowup: Dead, no disease;vital: Dead-other;lastfudt: 10-Jul-98;futime: 122;ajcc4: 4;ajcc2: 1;osccdeath: 0;alldeath: 1
GSM1049159	GSE42743	oral_tissue	tu-vs-nl: cancer;age@dx: 71;gender: Female;smoking status: Current;oc vs. op: Oral cavity;t stage: 3;cn stage: 2c;pn stage: 2C;dm?: 0;ecs: Y;treatment*: S;dxdate: 6-Jul-98;txdate: 16-Jul-98;localrecur: 0;nodalrecur: 0;dm?: 0;survivallastfollowup: Dead;vital: Dead-other;lastfudt: 16-Jul-98;futime: 10;ajcc4: 4;ajcc2: 1;osccdeath: 0;alldeath: 1
GSM1049161	GSE42743	oral_tissue	tu-vs-nl: cancer;age@dx: 57;gender: Female;smoking status: Current;oc vs. op: Oral cavity;t stage: 2;cn stage: 0;pn stage: 0;dm?: 0;ecs: N;treatment*: S;dxdate: 24-Jul-98;txdate: 12-Aug-98;localrecur: 0;nodalrecur: 0;dm?: 0;survivallastfollowup: Living NED;vital: Alive;lastfudt: 30-Nov-01;futime: 1225;ajcc4: 2;ajcc2: 0;osccdeath: 0;alldeath: 0
GSM1049163	GSE42743	oral_tissue	tu-vs-nl: cancer;age@dx: 65;gender: Male;smoking status: Former;oc vs. op: Oral cavity;t stage: 2;cn stage: 0;pn stage: 0;dm?: 0;ecs: N;treatment*: S;dxdate: 27-Dec-99;txdate: 4-Jan-00;localrecur: 0;nodalrecur: 0;dm?: 0;survivallastfollowup: Living NED;vital: Alive;lastfudt: 18-Feb-04;futime: 1514;ajcc4: 2;ajcc2: 0;osccdeath: 0;alldeath: 0
GSM1049165	GSE42743	oral_tissue	tu-vs-nl: normal;age@dx: 34;gender: Male;smoking status: NeverSmoker;oc vs. op: Oral cavity;t stage: 2;cn stage: 0;pn stage: 0;dm?: 0;ecs: N;treatment*: S;dxdate: 9-Dec-97;txdate: 26-Dec-97;localrecur: 0;nodalrecur: 0;dm?: 0;survivallastfollowup: Living NED;vital: .;lastfudt: 24-Jun-04;futime: 2389;ajcc4: 2;ajcc2: 0;osccdeath: 0;alldeath: 1
GSM1049166	GSE42743	oral_tissue	tu-vs-nl: cancer;age@dx: 58;gender: Female;smoking status: Former;oc vs. op: Oral cavity;t stage: 2;cn stage: 2a;pn stage: 1;dm?: 0;ecs: N;treatment*: S;dxdate: 24-Jan-07;txdate: 26-Jan-07;localrecur: 0;nodalrecur: 0;dm?: 0;survivallastfollowup: Living NED;vital: Alive;lastfudt: 7-Nov-08;futime: 653;ajcc4: 3;ajcc2: 1;osccdeath: 0;alldeath: 0
GSM1049168	GSE42743	oral_tissue	tu-vs-nl: cancer;age@dx: 82;gender: Male;smoking status: Former;oc vs. op: Oral cavity;t stage: 2;cn stage: 0;pn stage: 2B;dm?: 0;ecs: Y;treatment*: S, RT;dxdate: 25-Jan-07;txdate: 12-Feb-07;localrecur: 0;nodalrecur: 0;dm?: 0;survivallastfollowup: Living NED;vital: Alive;lastfudt: 13-Nov-08;futime: 658;ajcc4: 4;ajcc2: 1;osccdeath: 0;alldeath: 0
GSM1049170	GSE42743	oral_tissue	tu-vs-nl: cancer;age@dx: 63;gender: Male;smoking status: Former;oc vs. op: Oral cavity;t stage: 4;cn stage: 2b;pn stage: 2B;dm?: 0;ecs: Y;treatment*: S, RT;dxdate: 7-Jul-95;txdate: 27-Jul-95;localrecur: ?;nodalrecur: ?;dm?: ?;survivallastfollowup: Dead with Disease;vital: Dead-OSCC;lastfudt: 22-Aug-95;futime: 46;ajcc4: 4;ajcc2: 1;osccdeath: 1;alldeath: 1
GSM114528	GSE5081	stomach	Age: 87;Gender: female;Tissue: HP- erosive gastritis, non-erosive site
GSM114529	GSE5081	stomach	Age: 88;Gender: female;Tissue: HP- erosive gastritis, non-erosive site
GSM114530	GSE5081	stomach	Age: 52;Gender: male;Tissue: HP- erosive gastritis, non-erosive site
GSM114531	GSE5081	stomach	Age: 86;Gender: female;Tissue: HP- erosive gastritis, non-erosive site
GSM114532	GSE5081	stomach	Age: 56;Gender: male;Tissue: HP- erosive gastritis, non-erosive site
GSM114533	GSE5081	stomach	Age: 70;Gender: male;Tissue: HP- erosive gastritis, non-erosive site
GSM114534	GSE5081	stomach	Age: 51;Gender: female;Tissue: HP- erosive gastritis, non-erosive site
GSM114535	GSE5081	stomach	Age: 50;Gender: female;Tissue: HP- erosive gastritis, non-erosive site
GSM119615	GSE5281	entorhinal_cortex	Sample Amount: 10 ug;Bio-Source Name: EC control 1;Organism: Human¬†;Organ/Tissue Type: brain¬†;Organ Region: Entorhinal Cortex¬†;Cell Type: layer III neurons¬†;Ethnicity: Caucasian¬†;Developmental Stage: Adult¬†;Disease State: normal¬†;Sex: male¬†;Genetic Variation: None¬†;Age: 63 years
GSM119616	GSE5281	entorhinal_cortex	Sample Amount: 10 ug;Bio-Source Name: EC control 2;Organism: Human¬†;Organ/Tissue Type: brain¬†;Organ Region: Entorhinal Cortex¬†;Cell Type: layer III neurons¬†;Ethnicity: Caucasian¬†;Developmental Stage: Adult¬†;Disease State: normal¬†;Sex: male¬†;Genetic Variation: None¬†;Age: 85 years
GSM119617	GSE5281	entorhinal_cortex	Sample Amount: 10 ug;Bio-Source Name: EC control 3;Organism: Human¬†;Organ/Tissue Type: brain¬†;Organ Region: Entorhinal Cortex¬†;Cell Type: layer III neurons¬†;Ethnicity: Caucasian¬†;Developmental Stage: Adult¬†;Disease State: normal¬†;Sex: male¬†;Genetic Variation: None¬†;Age: 80 years
GSM119618	GSE5281	entorhinal_cortex	Sample Amount: 10 ug;Bio-Source Name: EC control 4;Organism: Human¬†;Organ/Tissue Type: brain¬†;Organ Region: Entorhinal Cortex¬†;Cell Type: layer III neurons¬†;Ethnicity: Caucasian¬†;Developmental Stage: Adult¬†;Disease State: normal¬†;Sex: male¬†;Genetic Variation: None¬†;Age: 80 years
GSM119619	GSE5281	entorhinal_cortex	Sample Amount: 10 ug;Bio-Source Name: EC control 5;Organism: Human¬†;Organ/Tissue Type: brain¬†;Organ Region: Entorhinal Cortex¬†;Cell Type: layer III neurons¬†;Ethnicity: Caucasian¬†;Developmental Stage: Adult¬†;Disease State: normal¬†;Sex: female¬†;Genetic Variation: None¬†;Age: 102 years
GSM119620	GSE5281	entorhinal_cortex	Sample Amount: 10 ug;Bio-Source Name: EC control 6;Organism: Human¬†;Organ/Tissue Type: brain¬†;Organ Region: Entorhinal Cortex¬†;Cell Type: layer III neurons¬†;Ethnicity: Caucasian¬†;Developmental Stage: Adult¬†;Disease State: normal¬†;Sex: male¬†;Genetic Variation: None¬†;Age: 79 years
GSM119621	GSE5281	entorhinal_cortex	Sample Amount: 10 ug;Bio-Source Name: EC control 7;Organism: Human¬†;Organ/Tissue Type: brain¬†;Organ Region: Entorhinal Cortex¬†;Cell Type: layer III neurons¬†;Ethnicity: Caucasian¬†;Developmental Stage: Adult¬†;Disease State: normal¬†;Sex: male¬†;Genetic Variation: None¬†;Age: 76 years
GSM119622	GSE5281	entorhinal_cortex	Sample Amount: 10 ug;Bio-Source Name: EC control 8;Organism: Human¬†;Organ/Tissue Type: brain¬†;Organ Region: Entorhinal Cortex¬†;Cell Type: layer III neurons¬†;Ethnicity: Caucasian¬†;Developmental Stage: Adult¬†;Disease State: normal¬†;Sex: male¬†;Genetic Variation: None¬†;Age: 83 years
GSM119623	GSE5281	entorhinal_cortex	Sample Amount: 10 ug;Bio-Source Name: EC control 9;Organism: Human¬†;Organ/Tissue Type: brain¬†;Organ Region: Entorhinal Cortex¬†;Cell Type: layer III neurons¬†;Ethnicity: Caucasian¬†;Developmental Stage: Adult¬†;Disease State: normal¬†;Sex: male¬†;Genetic Variation: None¬†;Age: 79 years
GSM119624	GSE5281	entorhinal_cortex	Sample Amount: 10 ug;Bio-Source Name: EC control 10;Organism: Human¬†;Organ/Tissue Type: brain¬†;Organ Region: Entorhinal Cortex¬†;Cell Type: layer III neurons¬†;Ethnicity: Caucasian¬†;Developmental Stage: Adult¬†;Disease State: normal¬†;Sex: female¬†;Genetic Variation: None¬†;Age: 88 years
GSM119625	GSE5281	entorhinal_cortex	Sample Amount: 10 ug;Bio-Source Name: EC control 11;Organism: Human¬†;Organ/Tissue Type: brain¬†;Organ Region: Entorhinal Cortex¬†;Cell Type: layer III neurons¬†;Ethnicity: Caucasian¬†;Developmental Stage: Adult¬†;Disease State: normal¬†;Sex: female¬†;Genetic Variation: None¬†;Age: 82 years
GSM119626	GSE5281	entorhinal_cortex	Sample Amount: 10 ug;Bio-Source Name: EC control 12;Organism: Human¬†;Organ/Tissue Type: brain¬†;Organ Region: Entorhinal Cortex¬†;Cell Type: layer III neurons¬†;Ethnicity: Caucasian¬†;Developmental Stage: Adult¬†;Disease State: normal¬†;Sex: male¬†;Genetic Variation: None¬†;Age: 69 years
GSM119627	GSE5281	entorhinal_cortex	Sample Amount: 10 ug;Bio-Source Name: EC control 13;Organism: Human¬†;Organ/Tissue Type: brain¬†;Organ Region: Entorhinal Cortex¬†;Cell Type: layer III neurons¬†;Ethnicity: Caucasian¬†;Developmental Stage: Adult¬†;Disease State: normal¬†;Sex: male¬†;Genetic Variation: None¬†;Age: 78 years
GSM119628	GSE5281	hippocampus	Sample Amount: 10 ug;Bio-Source Name: HIP control 1;Organism: Human¬†;Organ/Tissue Type: brain¬†;Organ Region: hippocampus¬†;Cell Type: layer III neurons¬†;Ethnicity: Caucasian¬†;Developmental Stage: Adult¬†;Disease State: normal¬†;Sex: male¬†;Genetic Variation: None¬†;Age: 85 days
GSM119629	GSE5281	hippocampus	Sample Amount: 10 ug;Bio-Source Name: HIP control 2;Organism: Human¬†;Organ/Tissue Type: brain¬†;Organ Region: hippocampus¬†;Cell Type: layer III neurons¬†;Ethnicity: Caucasian¬†;Developmental Stage: Adult¬†;Disease State: normal¬†;Sex: male¬†;Genetic Variation: None¬†;Age: 80 years
GSM119630	GSE5281	hippocampus	Sample Amount: 10 ug;Bio-Source Name: HIP control 3;Organism: Human¬†;Organ/Tissue Type: brain¬†;Organ Region: hippocampus¬†;Cell Type: layer III neurons¬†;Ethnicity: Caucasian¬†;Developmental Stage: Adult¬†;Disease State: normal¬†;Sex: male¬†;Genetic Variation: None¬†;Age: 80 years
GSM119631	GSE5281	hippocampus	Sample Amount: 10 ug;Bio-Source Name: HIP control 4;Organism: Human¬†;Organ/Tissue Type: brain¬†;Organ Region: hippocampus¬†;Cell Type: layer III neurons¬†;Ethnicity: Caucasian¬†;Developmental Stage: Adult¬†;Disease State: normal¬†;Sex: female¬†;Genetic Variation: None¬†;Age: 102 years
GSM119632	GSE5281	hippocampus	Sample Amount: 10 ug;Bio-Source Name: HIP control 5;Organism: Human¬†;Organ/Tissue Type: brain¬†;Organ Region: hippocampus¬†;Cell Type: layer III neurons¬†;Ethnicity: Caucasian¬†;Developmental Stage: Adult¬†;Disease State: normal¬†;Sex: male¬†;Genetic Variation: None¬†;Age: 63 years
GSM119633	GSE5281	hippocampus	Sample Amount: 10 ug;Bio-Source Name: HIP control 6;Organism: Human¬†;Organ/Tissue Type: brain¬†;Organ Region: hippocampus¬†;Cell Type: layer III neurons¬†;Ethnicity: Caucasian¬†;Developmental Stage: Adult¬†;Disease State: normal¬†;Sex: male¬†;Genetic Variation: None¬†;Age: 79 years
GSM119634	GSE5281	hippocampus	Sample Amount: 10 ug;Bio-Source Name: HIP control 7;Organism: Human¬†;Organ/Tissue Type: brain¬†;Organ Region: hippocampus¬†;Cell Type: layer III neurons¬†;Ethnicity: Caucasian¬†;Developmental Stage: Adult¬†;Disease State: normal¬†;Sex: male¬†;Genetic Variation: None¬†;Age: 76 years
GSM119635	GSE5281	hippocampus	Sample Amount: 10 ug;Bio-Source Name: HIP control 8;Organism: Human¬†;Organ/Tissue Type: brain¬†;Organ Region: hippocampus¬†;Cell Type: layer III neurons¬†;Ethnicity: Caucasian¬†;Developmental Stage: Adult¬†;Disease State: normal¬†;Sex: male¬†;Genetic Variation: None¬†;Age: 83 years
GSM119636	GSE5281	hippocampus	Sample Amount: 10 ug;Bio-Source Name: HIP control 9;Organism: Human¬†;Organ/Tissue Type: brain¬†;Organ Region: hippocampus¬†;Cell Type: layer III neurons¬†;Ethnicity: Caucasian¬†;Developmental Stage: Adult¬†;Disease State: normal¬†;Sex: male¬†;Genetic Variation: None¬†;Age: 79 years
GSM119637	GSE5281	hippocampus	Sample Amount: 10 ug;Bio-Source Name: HIP control 10;Organism: Human¬†;Organ/Tissue Type: brain¬†;Organ Region: hippocampus¬†;Cell Type: layer III neurons¬†;Ethnicity: Caucasian¬†;Developmental Stage: Adult¬†;Disease State: normal¬†;Sex: female¬†;Genetic Variation: None¬†;Age: 88 years
GSM119638	GSE5281	hippocampus	Sample Amount: 10 ug;Bio-Source Name: HIP control 11;Organism: Human¬†;Organ/Tissue Type: brain¬†;Organ Region: hippocampus¬†;Cell Type: layer III neurons¬†;Ethnicity: Caucasian¬†;Developmental Stage: Adult¬†;Disease State: normal¬†;Sex: female¬†;Genetic Variation: None¬†;Age: 73 years
GSM119639	GSE5281	hippocampus	Sample Amount: 10 ug;Bio-Source Name: HIP control 12;Organism: Human¬†;Organ/Tissue Type: brain¬†;Organ Region: hippocampus¬†;Cell Type: layer III neurons¬†;Ethnicity: Caucasian¬†;Developmental Stage: Adult¬†;Disease State: normal¬†;Sex: male¬†;Genetic Variation: None¬†;Age: 69 years
GSM119640	GSE5281	hippocampus	Sample Amount: 10 ug;Bio-Source Name: HIP control 13;Organism: Human¬†;Organ/Tissue Type: brain¬†;Organ Region: hippocampus¬†;Cell Type: layer III neurons¬†;Ethnicity: Caucasian¬†;Developmental Stage: Adult¬†;Disease State: normal¬†;Sex: male¬†;Genetic Variation: None¬†;Age: 78 years
GSM119641	GSE5281	medial_temporal_gyrus	Sample Amount: 10 ug;Bio-Source Name: MTG control 1;Organism: Human¬†;Organ/Tissue Type: brain¬†;Organ Region: Medial Temporal Gyrus¬†;Cell Type: layer III neurons¬†;Ethnicity: Caucasian¬†;Developmental Stage: Adult¬†;Disease State: normal¬†;Sex: male¬†;Genetic Variation: None¬†;Age: 85 years
GSM119642	GSE5281	medial_temporal_gyrus	Sample Amount: 10 ug;Bio-Source Name: MTG control 2;Organism: Human¬†;Organ/Tissue Type: brain¬†;Organ Region: Medial Temporal Gyrus¬†;Cell Type: layer III neurons¬†;Ethnicity: Caucasian¬†;Developmental Stage: Adult¬†;Disease State: normal¬†;Sex: male¬†;Genetic Variation: None¬†;Age: 80 years
GSM119643	GSE5281	medial_temporal_gyrus	Sample Amount: 10 ug;Bio-Source Name: MTG control 3;Organism: Human¬†;Organ/Tissue Type: brain¬†;Organ Region: Medial Temporal Gyrus¬†;Cell Type: layer III neurons¬†;Ethnicity: Caucasian¬†;Developmental Stage: Adult¬†;Disease State: normal¬†;Sex: female¬†;Genetic Variation: None¬†;Age: 102 years
GSM119644	GSE5281	medial_temporal_gyrus	Sample Amount: 10 ug;Bio-Source Name: MTG control 4;Organism: Human¬†;Organ/Tissue Type: brain¬†;Organ Region: Medial Temporal Gyrus¬†;Cell Type: layer III neurons¬†;Ethnicity: Caucasian¬†;Developmental Stage: Adult¬†;Disease State: normal¬†;Sex: male¬†;Genetic Variation: None¬†;Age: 63 years
GSM119645	GSE5281	medial_temporal_gyrus	Sample Amount: 10 ug;Bio-Source Name: MTG control 5;Organism: Human¬†;Organ/Tissue Type: brain¬†;Organ Region: Medial Temporal Gyrus¬†;Cell Type: layer III neurons¬†;Ethnicity: Caucasian¬†;Developmental Stage: Adult¬†;Disease State: normal¬†;Sex: male¬†;Genetic Variation: None¬†;Age: 79 years
GSM119646	GSE5281	medial_temporal_gyrus	Sample Amount: 10 ug;Bio-Source Name: MTG control 6;Organism: Human¬†;Organ/Tissue Type: brain¬†;Organ Region: Medial Temporal Gyrus¬†;Cell Type: layer III neurons¬†;Ethnicity: Caucasian¬†;Developmental Stage: Adult¬†;Disease State: normal¬†;Sex: male¬†;Genetic Variation: None¬†;Age: 83 years
GSM119647	GSE5281	medial_temporal_gyrus	Sample Amount: 10 ug;Bio-Source Name: MTG control 7;Organism: Human¬†;Organ/Tissue Type: brain¬†;Organ Region: Medial Temporal Gyrus¬†;Cell Type: layer III neurons¬†;Ethnicity: Caucasian¬†;Developmental Stage: Adult¬†;Disease State: normal¬†;Sex: male¬†;Genetic Variation: None¬†;Age: 79 years
GSM119648	GSE5281	medial_temporal_gyrus	Sample Amount: 10 ug;Bio-Source Name: MTG control 8;Organism: Human¬†;Organ/Tissue Type: brain¬†;Organ Region: Medial Temporal Gyrus¬†;Cell Type: layer III neurons¬†;Ethnicity: Caucasian¬†;Developmental Stage: Adult¬†;Disease State: normal¬†;Sex: female¬†;Genetic Variation: None¬†;Age: 88 years
GSM119649	GSE5281	medial_temporal_gyrus	Sample Amount: 10 ug;Bio-Source Name: MTG control 9;Organism: Human¬†;Organ/Tissue Type: brain¬†;Organ Region: Medial Temporal Gyrus¬†;Cell Type: layer III neurons¬†;Ethnicity: Caucasian¬†;Developmental Stage: Adult¬†;Disease State: normal¬†;Sex: female¬†;Genetic Variation: None¬†;Age: 82 years
GSM119650	GSE5281	medial_temporal_gyrus	Sample Amount: 10 ug;Bio-Source Name: MTG control 10;Organism: Human¬†;Organ/Tissue Type: brain¬†;Organ Region: Medial Temporal Gyrus¬†;Cell Type: layer III neurons¬†;Ethnicity: Caucasian¬†;Developmental Stage: Adult¬†;Disease State: normal¬†;Sex: female¬†;Genetic Variation: None¬†;Age: 73 years
GSM119651	GSE5281	medial_temporal_gyrus	Sample Amount: 10 ug;Bio-Source Name: MTG control 11;Organism: Human¬†;Organ/Tissue Type: brain¬†;Organ Region: Medial Temporal Gyrus¬†;Cell Type: layer III neurons¬†;Ethnicity: Caucasian¬†;Developmental Stage: Adult¬†;Disease State: normal¬†;Sex: male¬†;Genetic Variation: None¬†;Age: 69 years
GSM119652	GSE5281	medial_temporal_gyrus	Sample Amount: 10 ug;Bio-Source Name: MTG control 12;Organism: Human¬†;Organ/Tissue Type: brain¬†;Organ Region: Medial Temporal Gyrus¬†;Cell Type: layer III neurons¬†;Ethnicity: Caucasian¬†;Developmental Stage: Adult¬†;Disease State: normal¬†;Sex: male¬†;Genetic Variation: None¬†;Age: 78 years
GSM119653	GSE5281	posterior_singulate	Sample Amount: 10 ug;Bio-Source Name: PC control 1;Organism: Human¬†;Organ/Tissue Type: brain¬†;Organ Region: Posterior Singulate¬†;Cell Type: layer III neurons¬†;Ethnicity: Caucasian¬†;Developmental Stage: Adult¬†;Disease State: normal¬†;Sex: male¬†;Genetic Variation: None¬†;Age: 85 years
GSM119654	GSE5281	posterior_singulate	Sample Amount: 10 ug;Bio-Source Name: PC control 2;Organism: Human¬†;Organ/Tissue Type: brain¬†;Organ Region: Posterior Singulate¬†;Cell Type: layer III neurons¬†;Ethnicity: Caucasian¬†;Developmental Stage: Adult¬†;Disease State: normal¬†;Sex: male¬†;Genetic Variation: None¬†;Age: 80 years
GSM119655	GSE5281	posterior_singulate	Sample Amount: 10 ug;Bio-Source Name: PC control 3;Organism: Human¬†;Organ/Tissue Type: brain¬†;Organ Region: Posterior Singulate¬†;Cell Type: layer III neurons¬†;Ethnicity: Caucasian¬†;Developmental Stage: Adult¬†;Disease State: normal¬†;Sex: female¬†;Genetic Variation: None¬†;Age: 102 years
GSM119656	GSE5281	posterior_singulate	Sample Amount: 10 ug;Bio-Source Name: PC control 4;Organism: Human¬†;Organ/Tissue Type: brain¬†;Organ Region: Posterior Singulate¬†;Cell Type: layer III neurons¬†;Ethnicity: Caucasian¬†;Developmental Stage: Adult¬†;Disease State: normal¬†;Sex: male¬†;Genetic Variation: None¬†;Age: 63 years
GSM119657	GSE5281	posterior_singulate	Sample Amount: 10 ug;Bio-Source Name: PC control 5;Organism: Human¬†;Organ/Tissue Type: brain¬†;Organ Region: Posterior Singulate¬†;Cell Type: layer III neurons¬†;Ethnicity: Caucasian¬†;Developmental Stage: Adult¬†;Disease State: normal¬†;Sex: male¬†;Genetic Variation: None¬†;Age: 79 years
GSM119658	GSE5281	posterior_singulate	Sample Amount: 10 ug;Bio-Source Name: PC control 6;Organism: Human¬†;Organ/Tissue Type: brain¬†;Organ Region: Posterior Singulate¬†;Cell Type: layer III neurons¬†;Ethnicity: Caucasian¬†;Developmental Stage: Adult¬†;Disease State: normal¬†;Sex: male¬†;Genetic Variation: None¬†;Age: 76 years
GSM119659	GSE5281	posterior_singulate	Sample Amount: 10 ug;Bio-Source Name: PC control 7;Organism: Human¬†;Organ/Tissue Type: brain¬†;Organ Region: Posterior Singulate¬†;Cell Type: layer III neurons¬†;Ethnicity: Caucasian¬†;Developmental Stage: Adult¬†;Disease State: normal¬†;Sex: male¬†;Genetic Variation: None¬†;Age: 83 years
GSM119660	GSE5281	posterior_singulate	Sample Amount: 10 ug;Bio-Source Name: PC control 8;Organism: Human¬†;Organ/Tissue Type: brain¬†;Organ Region: Posterior Singulate¬†;Cell Type: layer III neurons¬†;Ethnicity: Caucasian¬†;Developmental Stage: Adult¬†;Disease State: normal¬†;Sex: male¬†;Genetic Variation: None¬†;Age: 79 years
GSM119661	GSE5281	posterior_singulate	Sample Amount: 10 ug;Bio-Source Name: PC control 9;Organism: Human¬†;Organ/Tissue Type: brain¬†;Organ Region: Posterior Singulate¬†;Cell Type: layer III neurons¬†;Ethnicity: Caucasian¬†;Developmental Stage: Adult¬†;Disease State: normal¬†;Sex: female¬†;Genetic Variation: None¬†;Age: 88 years
GSM119662	GSE5281	posterior_singulate	Sample Amount: 10 ug;Bio-Source Name: PC control 10;Organism: Human¬†;Organ/Tissue Type: brain¬†;Organ Region: Posterior Singulate¬†;Cell Type: layer III neurons¬†;Ethnicity: Caucasian¬†;Developmental Stage: Adult¬†;Disease State: normal¬†;Sex: female¬†;Genetic Variation: None¬†;Age: 82 years
GSM119663	GSE5281	posterior_singulate	Sample Amount: 10 ug;Bio-Source Name: PC control 11;Organism: Human¬†;Organ/Tissue Type: brain¬†;Organ Region: Posterior Singulate¬†;Cell Type: layer III neurons¬†;Ethnicity: Caucasian¬†;Developmental Stage: Adult¬†;Disease State: normal¬†;Sex: female¬†;Genetic Variation: None¬†;Age: 73 years
GSM119664	GSE5281	posterior_singulate	Sample Amount: 10 ug;Bio-Source Name: PC control 12;Organism: Human¬†;Organ/Tissue Type: brain¬†;Organ Region: Posterior Singulate¬†;Cell Type: layer III neurons¬†;Ethnicity: Caucasian¬†;Developmental Stage: Adult¬†;Disease State: normal¬†;Sex: male¬†;Genetic Variation: None¬†;Age: 69 years
GSM119665	GSE5281	posterior_singulate	Sample Amount: 10 ug;Bio-Source Name: PC control 13;Organism: Human¬†;Organ/Tissue Type: brain¬†;Organ Region: Posterior Singulate¬†;Cell Type: layer III neurons¬†;Ethnicity: Caucasian¬†;Developmental Stage: Adult¬†;Disease State: normal¬†;Sex: male¬†;Genetic Variation: None¬†;Age: 78 years
GSM119666	GSE5281	superior_frontal_gyrus	Sample Amount: 10 ug;Bio-Source Name: SFG control 1;Organism: Human¬†;Organ/Tissue Type: brain¬†;Organ Region: Superior Frontal Gyrus¬†;Cell Type: layer III neurons¬†;Ethnicity: Caucasian¬†;Developmental Stage: Adult¬†;Disease State: normal¬†;Sex: male¬†;Genetic Variation: None¬†;Age: 79 years
GSM119667	GSE5281	superior_frontal_gyrus	Sample Amount: 10 ug;Bio-Source Name: SFG control 2;Organism: Human¬†;Organ/Tissue Type: brain¬†;Organ Region: Superior Frontal Gyrus¬†;Cell Type: layer III neurons¬†;Ethnicity: Caucasian¬†;Developmental Stage: Adult¬†;Disease State: normal¬†;Sex: female¬†;Genetic Variation: None¬†;Age: 88 years
GSM119668	GSE5281	superior_frontal_gyrus	Sample Amount: 10 ug;Bio-Source Name: SFG control 3;Organism: Human¬†;Organ/Tissue Type: brain¬†;Organ Region: Superior Frontal Gyrus¬†;Cell Type: layer III neurons¬†;Ethnicity: Caucasian¬†;Developmental Stage: Adult¬†;Disease State: normal¬†;Sex: female¬†;Genetic Variation: None¬†;Age: 82 years
GSM119669	GSE5281	superior_frontal_gyrus	Sample Amount: 10 ug;Bio-Source Name: SFG control 4;Organism: Human¬†;Organ/Tissue Type: brain¬†;Organ Region: Superior Frontal Gyrus¬†;Cell Type: layer III neurons¬†;Ethnicity: Caucasian¬†;Developmental Stage: Adult¬†;Disease State: normal¬†;Sex: female¬†;Genetic Variation: None¬†;Age: 73 years
GSM119670	GSE5281	superior_frontal_gyrus	Sample Amount: 10 ug;Bio-Source Name: SFG control 5;Organism: Human¬†;Organ/Tissue Type: brain¬†;Organ Region: Superior Frontal Gyrus¬†;Cell Type: layer III neurons¬†;Ethnicity: Caucasian¬†;Developmental Stage: Adult¬†;Disease State: normal¬†;Sex: female¬†;Genetic Variation: None¬†;Age: 102 years
GSM119671	GSE5281	superior_frontal_gyrus	Sample Amount: 10 ug;Bio-Source Name: SFG control 6;Organism: Human¬†;Organ/Tissue Type: brain¬†;Organ Region: Superior Frontal Gyrus¬†;Cell Type: layer III neurons¬†;Ethnicity: Caucasian¬†;Developmental Stage: Adult¬†;Disease State: normal¬†;Sex: male¬†;Genetic Variation: None¬†;Age: 63 years
GSM119672	GSE5281	superior_frontal_gyrus	Sample Amount: 10 ug;Bio-Source Name: SFG control 7;Organism: Human¬†;Organ/Tissue Type: brain¬†;Organ Region: Superior Frontal Gyrus¬†;Cell Type: layer III neurons¬†;Ethnicity: Caucasian¬†;Developmental Stage: Adult¬†;Disease State: normal¬†;Sex: male¬†;Genetic Variation: None¬†;Age: 79 years
GSM119673	GSE5281	superior_frontal_gyrus	Sample Amount: 10 ug;Bio-Source Name: SFG control 8;Organism: Human¬†;Organ/Tissue Type: brain¬†;Organ Region: Superior Frontal Gyrus¬†;Cell Type: layer III neurons¬†;Ethnicity: Caucasian¬†;Developmental Stage: Adult¬†;Disease State: normal¬†;Sex: male¬†;Genetic Variation: None¬†;Age: 76 years
GSM119674	GSE5281	superior_frontal_gyrus	Sample Amount: 10 ug;Bio-Source Name: SFG control 9;Organism: Human¬†;Organ/Tissue Type: brain¬†;Organ Region: Superior Frontal Gyrus¬†;Cell Type: layer III neurons¬†;Ethnicity: Caucasian¬†;Developmental Stage: Adult¬†;Disease State: normal¬†;Sex: male¬†;Genetic Variation: None¬†;Age: 83 years
GSM119675	GSE5281	superior_frontal_gyrus	Sample Amount: 10 ug;Bio-Source Name: SFG control 10;Organism: Human¬†;Organ/Tissue Type: brain¬†;Organ Region: Superior Frontal Gyrus¬†;Cell Type: layer III neurons¬†;Ethnicity: Caucasian¬†;Developmental Stage: Adult¬†;Disease State: normal¬†;Sex: male¬†;Genetic Variation: None¬†;Age: 69 years
GSM119676	GSE5281	superior_frontal_gyrus	Sample Amount: 10 ug;Bio-Source Name: SFG control 11;Organism: Human¬†;Organ/Tissue Type: brain¬†;Organ Region: Superior Frontal Gyrus¬†;Cell Type: layer III neurons¬†;Ethnicity: Caucasian¬†;Developmental Stage: Adult¬†;Disease State: normal¬†;Sex: male¬†;Genetic Variation: None¬†;Age: 78 years
GSM119677	GSE5281	primary_visual_cortex	Sample Amount: 10 ug;Bio-Source Name: VCX control 1;Organism: Human¬†;Organ/Tissue Type: brain¬†;Organ Region: Primary Visual Cortex¬†;Cell Type: layer III neurons¬†;Ethnicity: Caucasian¬†;Developmental Stage: Adult¬†;Disease State: normal¬†;Sex: male¬†;Genetic Variation: None¬†;Age: 85 years
GSM119678	GSE5281	primary_visual_cortex	Sample Amount: 10 ug;Bio-Source Name: VCX control 2;Organism: Human¬†;Organ/Tissue Type: brain¬†;Organ Region: Primary Visual Cortex¬†;Cell Type: layer III neurons¬†;Ethnicity: Caucasian¬†;Developmental Stage: Adult¬†;Disease State: normal¬†;Sex: male¬†;Genetic Variation: None¬†;Age: 80 years
GSM119679	GSE5281	primary_visual_cortex	Sample Amount: 10 ug;Bio-Source Name: VCX control 3;Organism: Human¬†;Organ/Tissue Type: brain¬†;Organ Region: Primary Visual Cortex¬†;Cell Type: layer III neurons¬†;Ethnicity: Caucasian¬†;Developmental Stage: Adult¬†;Disease State: normal¬†;Sex: male¬†;Genetic Variation: None¬†;Age: 63 years
GSM119680	GSE5281	primary_visual_cortex	Sample Amount: 10 ug;Bio-Source Name: VCX control 4;Organism: Human¬†;Organ/Tissue Type: brain¬†;Organ Region: Primary Visual Cortex¬†;Cell Type: layer III neurons¬†;Ethnicity: Caucasian¬†;Developmental Stage: Adult¬†;Disease State: normal¬†;Sex: male¬†;Genetic Variation: None¬†;Age: 79 years
GSM119681	GSE5281	primary_visual_cortex	Sample Amount: 10 ug;Bio-Source Name: VCX control 5;Organism: Human¬†;Organ/Tissue Type: brain¬†;Organ Region: Primary Visual Cortex¬†;Cell Type: layer III neurons¬†;Ethnicity: Caucasian¬†;Developmental Stage: Adult¬†;Disease State: normal¬†;Sex: male¬†;Genetic Variation: None¬†;Age: 76 years
GSM119682	GSE5281	primary_visual_cortex	Sample Amount: 10 ug;Bio-Source Name: VCX control 6;Organism: Human¬†;Organ/Tissue Type: brain¬†;Organ Region: Primary Visual Cortex¬†;Cell Type: layer III neurons¬†;Ethnicity: Caucasian¬†;Developmental Stage: Adult¬†;Disease State: normal¬†;Sex: male¬†;Genetic Variation: None¬†;Age: 83 years
GSM119683	GSE5281	primary_visual_cortex	Sample Amount: 10 ug;Bio-Source Name: VCX control 7;Organism: Human¬†;Organ/Tissue Type: brain¬†;Organ Region: Primary Visual Cortex¬†;Cell Type: layer III neurons¬†;Ethnicity: Caucasian¬†;Developmental Stage: Adult¬†;Disease State: normal¬†;Sex: male¬†;Genetic Variation: None¬†;Age: 79 years
GSM119684	GSE5281	primary_visual_cortex	Sample Amount: 10 ug;Bio-Source Name: VCX control 8;Organism: Human¬†;Organ/Tissue Type: brain¬†;Organ Region: Primary Visual Cortex¬†;Cell Type: layer III neurons¬†;Ethnicity: Caucasian¬†;Developmental Stage: Adult¬†;Disease State: normal¬†;Sex: female¬†;Genetic Variation: None¬†;Age: 88 years
GSM119685	GSE5281	primary_visual_cortex	Sample Amount: 10 ug;Bio-Source Name: VCX control 9;Organism: Human¬†;Organ/Tissue Type: brain¬†;Organ Region: Primary Visual Cortex¬†;Cell Type: layer III neurons¬†;Ethnicity: Caucasian¬†;Developmental Stage: Adult¬†;Disease State: normal¬†;Sex: female¬†;Genetic Variation: None¬†;Age: 82 years
GSM119686	GSE5281	primary_visual_cortex	Sample Amount: 10 ug;Bio-Source Name: VCX control 10;Organism: Human¬†;Organ/Tissue Type: brain¬†;Organ Region: Primary Visual Cortex¬†;Cell Type: layer III neurons¬†;Ethnicity: Caucasian¬†;Developmental Stage: Adult¬†;Disease State: normal¬†;Sex: female¬†;Genetic Variation: None¬†;Age: 73 years
GSM119687	GSE5281	primary_visual_cortex	Sample Amount: 10 ug;Bio-Source Name: VCX control 11;Organism: Human¬†;Organ/Tissue Type: brain¬†;Organ Region: Primary Visual Cortex¬†;Cell Type: layer III neurons¬†;Ethnicity: Caucasian¬†;Developmental Stage: Adult¬†;Disease State: normal¬†;Sex: male¬†;Genetic Variation: None¬†;Age: 69 years
GSM119688	GSE5281	primary_visual_cortex	Sample Amount: 10 ug;Bio-Source Name: VCX control 12;Organism: Human¬†;Organ/Tissue Type: brain¬†;Organ Region: Primary Visual Cortex¬†;Cell Type: layer III neurons¬†;Ethnicity: Caucasian¬†;Developmental Stage: Adult¬†;Disease State: normal¬†;Sex: male¬†;Genetic Variation: None¬†;Age: 78 years
GSM122774	GSE5350	maqc_sample_a,_ie,_stratagene_universal_human_reference_rna_(uhrr,_catalog_#740000)	NA
GSM122775	GSE5350	maqc_sample_a,_ie,_stratagene_universal_human_reference_rna_(uhrr,_catalog_#740000)	NA
GSM122776	GSE5350	maqc_sample_a,_ie,_stratagene_universal_human_reference_rna_(uhrr,_catalog_#740000)	NA
GSM122777	GSE5350	maqc_sample_a,_ie,_stratagene_universal_human_reference_rna_(uhrr,_catalog_#740000)	NA
GSM122778	GSE5350	maqc_sample_a,_ie,_stratagene_universal_human_reference_rna_(uhrr,_catalog_#740000)	NA
GSM122779	GSE5350	maqc_sample_b,_ie,_ambion_human_brain_reference_rna_(hbrr,_catalog_#6050)	NA
GSM122780	GSE5350	maqc_sample_b,_ie,_ambion_human_brain_reference_rna_(hbrr,_catalog_#6050)	NA
GSM122781	GSE5350	maqc_sample_b,_ie,_ambion_human_brain_reference_rna_(hbrr,_catalog_#6050)	NA
GSM122782	GSE5350	maqc_sample_b,_ie,_ambion_human_brain_reference_rna_(hbrr,_catalog_#6050)	NA
GSM122783	GSE5350	maqc_sample_b,_ie,_ambion_human_brain_reference_rna_(hbrr,_catalog_#6050)	NA
GSM122784	GSE5350	maqc_sample_c,_ie,_maqc_samples_a_and_b_mixed_at_75%:25%_ratio_(a:b)	NA
GSM122785	GSE5350	maqc_sample_c,_ie,_maqc_samples_a_and_b_mixed_at_75%:25%_ratio_(a:b)	NA
GSM122786	GSE5350	maqc_sample_c,_ie,_maqc_samples_a_and_b_mixed_at_75%:25%_ratio_(a:b)	NA
GSM122787	GSE5350	maqc_sample_c,_ie,_maqc_samples_a_and_b_mixed_at_75%:25%_ratio_(a:b)	NA
GSM122788	GSE5350	maqc_sample_c,_ie,_maqc_samples_a_and_b_mixed_at_75%:25%_ratio_(a:b)	NA
GSM122789	GSE5350	maqc_sample_d,_ie,_maqc_samples_a_and_b_mixed_at_25%:75%_ratio_(a:b)	NA
GSM122790	GSE5350	maqc_sample_d,_ie,_maqc_samples_a_and_b_mixed_at_25%:75%_ratio_(a:b)	NA
GSM122791	GSE5350	maqc_sample_d,_ie,_maqc_samples_a_and_b_mixed_at_25%:75%_ratio_(a:b)	NA
GSM122792	GSE5350	maqc_sample_d,_ie,_maqc_samples_a_and_b_mixed_at_25%:75%_ratio_(a:b)	NA
GSM122793	GSE5350	maqc_sample_d,_ie,_maqc_samples_a_and_b_mixed_at_25%:75%_ratio_(a:b)	NA
GSM122794	GSE5350	maqc_sample_a,_ie,_stratagene_universal_human_reference_rna_(uhrr,_catalog_#740000)	NA
GSM122795	GSE5350	maqc_sample_a,_ie,_stratagene_universal_human_reference_rna_(uhrr,_catalog_#740000)	NA
GSM122796	GSE5350	maqc_sample_a,_ie,_stratagene_universal_human_reference_rna_(uhrr,_catalog_#740000)	NA
GSM122797	GSE5350	maqc_sample_a,_ie,_stratagene_universal_human_reference_rna_(uhrr,_catalog_#740000)	NA
GSM122798	GSE5350	maqc_sample_a,_ie,_stratagene_universal_human_reference_rna_(uhrr,_catalog_#740000)	NA
GSM122799	GSE5350	maqc_sample_b,_ie,_ambion_human_brain_reference_rna_(hbrr,_catalog_#6050)	NA
GSM122800	GSE5350	maqc_sample_b,_ie,_ambion_human_brain_reference_rna_(hbrr,_catalog_#6050)	NA
GSM122801	GSE5350	maqc_sample_b,_ie,_ambion_human_brain_reference_rna_(hbrr,_catalog_#6050)	NA
GSM122802	GSE5350	maqc_sample_b,_ie,_ambion_human_brain_reference_rna_(hbrr,_catalog_#6050)	NA
GSM122803	GSE5350	maqc_sample_b,_ie,_ambion_human_brain_reference_rna_(hbrr,_catalog_#6050)	NA
GSM122804	GSE5350	maqc_sample_c,_ie,_maqc_samples_a_and_b_mixed_at_75%:25%_ratio_(a:b)	NA
GSM122805	GSE5350	maqc_sample_c,_ie,_maqc_samples_a_and_b_mixed_at_75%:25%_ratio_(a:b)	NA
GSM122806	GSE5350	maqc_sample_c,_ie,_maqc_samples_a_and_b_mixed_at_75%:25%_ratio_(a:b)	NA
GSM122807	GSE5350	maqc_sample_c,_ie,_maqc_samples_a_and_b_mixed_at_75%:25%_ratio_(a:b)	NA
GSM122808	GSE5350	maqc_sample_c,_ie,_maqc_samples_a_and_b_mixed_at_75%:25%_ratio_(a:b)	NA
GSM122809	GSE5350	maqc_sample_d,_ie,_maqc_samples_a_and_b_mixed_at_25%:75%_ratio_(a:b)	NA
GSM122810	GSE5350	maqc_sample_d,_ie,_maqc_samples_a_and_b_mixed_at_25%:75%_ratio_(a:b)	NA
GSM122811	GSE5350	maqc_sample_d,_ie,_maqc_samples_a_and_b_mixed_at_25%:75%_ratio_(a:b)	NA
GSM122812	GSE5350	maqc_sample_d,_ie,_maqc_samples_a_and_b_mixed_at_25%:75%_ratio_(a:b)	NA
GSM122813	GSE5350	maqc_sample_d,_ie,_maqc_samples_a_and_b_mixed_at_25%:75%_ratio_(a:b)	NA
GSM122814	GSE5350	maqc_sample_a,_ie,_stratagene_universal_human_reference_rna_(uhrr,_catalog_#740000)	NA
GSM122815	GSE5350	maqc_sample_a,_ie,_stratagene_universal_human_reference_rna_(uhrr,_catalog_#740000)	NA
GSM122816	GSE5350	maqc_sample_a,_ie,_stratagene_universal_human_reference_rna_(uhrr,_catalog_#740000)	NA
GSM122817	GSE5350	maqc_sample_a,_ie,_stratagene_universal_human_reference_rna_(uhrr,_catalog_#740000)	NA
GSM122818	GSE5350	maqc_sample_a,_ie,_stratagene_universal_human_reference_rna_(uhrr,_catalog_#740000)	NA
GSM122819	GSE5350	maqc_sample_b,_ie,_ambion_human_brain_reference_rna_(hbrr,_catalog_#6050)	NA
GSM122820	GSE5350	maqc_sample_b,_ie,_ambion_human_brain_reference_rna_(hbrr,_catalog_#6050)	NA
GSM122821	GSE5350	maqc_sample_b,_ie,_ambion_human_brain_reference_rna_(hbrr,_catalog_#6050)	NA
GSM122822	GSE5350	maqc_sample_b,_ie,_ambion_human_brain_reference_rna_(hbrr,_catalog_#6050)	NA
GSM122823	GSE5350	maqc_sample_b,_ie,_ambion_human_brain_reference_rna_(hbrr,_catalog_#6050)	NA
GSM122824	GSE5350	maqc_sample_c,_ie,_maqc_samples_a_and_b_mixed_at_75%:25%_ratio_(a:b)	NA
GSM122825	GSE5350	maqc_sample_c,_ie,_maqc_samples_a_and_b_mixed_at_75%:25%_ratio_(a:b)	NA
GSM122826	GSE5350	maqc_sample_c,_ie,_maqc_samples_a_and_b_mixed_at_75%:25%_ratio_(a:b)	NA
GSM122827	GSE5350	maqc_sample_c,_ie,_maqc_samples_a_and_b_mixed_at_75%:25%_ratio_(a:b)	NA
GSM122828	GSE5350	maqc_sample_c,_ie,_maqc_samples_a_and_b_mixed_at_75%:25%_ratio_(a:b)	NA
GSM122829	GSE5350	maqc_sample_d,_ie,_maqc_samples_a_and_b_mixed_at_25%:75%_ratio_(a:b)	NA
GSM122830	GSE5350	maqc_sample_d,_ie,_maqc_samples_a_and_b_mixed_at_25%:75%_ratio_(a:b)	NA
GSM122831	GSE5350	maqc_sample_d,_ie,_maqc_samples_a_and_b_mixed_at_25%:75%_ratio_(a:b)	NA
GSM122832	GSE5350	maqc_sample_d,_ie,_maqc_samples_a_and_b_mixed_at_25%:75%_ratio_(a:b)	NA
GSM122833	GSE5350	maqc_sample_d,_ie,_maqc_samples_a_and_b_mixed_at_25%:75%_ratio_(a:b)	NA
GSM122834	GSE5350	maqc_sample_a,_ie,_stratagene_universal_human_reference_rna_(uhrr,_catalog_#740000)	NA
GSM122835	GSE5350	maqc_sample_a,_ie,_stratagene_universal_human_reference_rna_(uhrr,_catalog_#740000)	NA
GSM122836	GSE5350	maqc_sample_a,_ie,_stratagene_universal_human_reference_rna_(uhrr,_catalog_#740000)	NA
GSM122837	GSE5350	maqc_sample_a,_ie,_stratagene_universal_human_reference_rna_(uhrr,_catalog_#740000)	NA
GSM122838	GSE5350	maqc_sample_a,_ie,_stratagene_universal_human_reference_rna_(uhrr,_catalog_#740000)	NA
GSM122839	GSE5350	maqc_sample_b,_ie,_ambion_human_brain_reference_rna_(hbrr,_catalog_#6050)	NA
GSM122840	GSE5350	maqc_sample_b,_ie,_ambion_human_brain_reference_rna_(hbrr,_catalog_#6050)	NA
GSM122841	GSE5350	maqc_sample_b,_ie,_ambion_human_brain_reference_rna_(hbrr,_catalog_#6050)	NA
GSM122842	GSE5350	maqc_sample_b,_ie,_ambion_human_brain_reference_rna_(hbrr,_catalog_#6050)	NA
GSM122843	GSE5350	maqc_sample_b,_ie,_ambion_human_brain_reference_rna_(hbrr,_catalog_#6050)	NA
GSM122844	GSE5350	maqc_sample_c,_ie,_maqc_samples_a_and_b_mixed_at_75%:25%_ratio_(a:b)	NA
GSM122845	GSE5350	maqc_sample_c,_ie,_maqc_samples_a_and_b_mixed_at_75%:25%_ratio_(a:b)	NA
GSM122846	GSE5350	maqc_sample_c,_ie,_maqc_samples_a_and_b_mixed_at_75%:25%_ratio_(a:b)	NA
GSM122847	GSE5350	maqc_sample_c,_ie,_maqc_samples_a_and_b_mixed_at_75%:25%_ratio_(a:b)	NA
GSM122848	GSE5350	maqc_sample_c,_ie,_maqc_samples_a_and_b_mixed_at_75%:25%_ratio_(a:b)	NA
GSM122849	GSE5350	maqc_sample_d,_ie,_maqc_samples_a_and_b_mixed_at_25%:75%_ratio_(a:b)	NA
GSM122850	GSE5350	maqc_sample_d,_ie,_maqc_samples_a_and_b_mixed_at_25%:75%_ratio_(a:b)	NA
GSM122851	GSE5350	maqc_sample_d,_ie,_maqc_samples_a_and_b_mixed_at_25%:75%_ratio_(a:b)	NA
GSM122852	GSE5350	maqc_sample_d,_ie,_maqc_samples_a_and_b_mixed_at_25%:75%_ratio_(a:b)	NA
GSM122853	GSE5350	maqc_sample_d,_ie,_maqc_samples_a_and_b_mixed_at_25%:75%_ratio_(a:b)	NA
GSM122854	GSE5350	maqc_sample_a,_ie,_stratagene_universal_human_reference_rna_(uhrr,_catalog_#740000)	NA
GSM122855	GSE5350	maqc_sample_a,_ie,_stratagene_universal_human_reference_rna_(uhrr,_catalog_#740000)	NA
GSM122856	GSE5350	maqc_sample_a,_ie,_stratagene_universal_human_reference_rna_(uhrr,_catalog_#740000)	NA
GSM122857	GSE5350	maqc_sample_a,_ie,_stratagene_universal_human_reference_rna_(uhrr,_catalog_#740000)	NA
GSM122858	GSE5350	maqc_sample_a,_ie,_stratagene_universal_human_reference_rna_(uhrr,_catalog_#740000)	NA
GSM122859	GSE5350	maqc_sample_b,_ie,_ambion_human_brain_reference_rna_(hbrr,_catalog_#6050)	NA
GSM122860	GSE5350	maqc_sample_b,_ie,_ambion_human_brain_reference_rna_(hbrr,_catalog_#6050)	NA
GSM122861	GSE5350	maqc_sample_b,_ie,_ambion_human_brain_reference_rna_(hbrr,_catalog_#6050)	NA
GSM122862	GSE5350	maqc_sample_b,_ie,_ambion_human_brain_reference_rna_(hbrr,_catalog_#6050)	NA
GSM122863	GSE5350	maqc_sample_b,_ie,_ambion_human_brain_reference_rna_(hbrr,_catalog_#6050)	NA
GSM122864	GSE5350	maqc_sample_c,_ie,_maqc_samples_a_and_b_mixed_at_75%:25%_ratio_(a:b)	NA
GSM122865	GSE5350	maqc_sample_c,_ie,_maqc_samples_a_and_b_mixed_at_75%:25%_ratio_(a:b)	NA
GSM122866	GSE5350	maqc_sample_c,_ie,_maqc_samples_a_and_b_mixed_at_75%:25%_ratio_(a:b)	NA
GSM122867	GSE5350	maqc_sample_c,_ie,_maqc_samples_a_and_b_mixed_at_75%:25%_ratio_(a:b)	NA
GSM122868	GSE5350	maqc_sample_c,_ie,_maqc_samples_a_and_b_mixed_at_75%:25%_ratio_(a:b)	NA
GSM122869	GSE5350	maqc_sample_d,_ie,_maqc_samples_a_and_b_mixed_at_25%:75%_ratio_(a:b)	NA
GSM122870	GSE5350	maqc_sample_d,_ie,_maqc_samples_a_and_b_mixed_at_25%:75%_ratio_(a:b)	NA
GSM122871	GSE5350	maqc_sample_d,_ie,_maqc_samples_a_and_b_mixed_at_25%:75%_ratio_(a:b)	NA
GSM122872	GSE5350	maqc_sample_d,_ie,_maqc_samples_a_and_b_mixed_at_25%:75%_ratio_(a:b)	NA
GSM122873	GSE5350	maqc_sample_d,_ie,_maqc_samples_a_and_b_mixed_at_25%:75%_ratio_(a:b)	NA
GSM122874	GSE5350	maqc_sample_a,_ie,_stratagene_universal_human_reference_rna_(uhrr,_catalog_#740000)	NA
GSM122875	GSE5350	maqc_sample_a,_ie,_stratagene_universal_human_reference_rna_(uhrr,_catalog_#740000)	NA
GSM122876	GSE5350	maqc_sample_a,_ie,_stratagene_universal_human_reference_rna_(uhrr,_catalog_#740000)	NA
GSM122877	GSE5350	maqc_sample_a,_ie,_stratagene_universal_human_reference_rna_(uhrr,_catalog_#740000)	NA
GSM122878	GSE5350	maqc_sample_a,_ie,_stratagene_universal_human_reference_rna_(uhrr,_catalog_#740000)	NA
GSM122879	GSE5350	maqc_sample_b,_ie,_ambion_human_brain_reference_rna_(hbrr,_catalog_#6050)	NA
GSM122880	GSE5350	maqc_sample_b,_ie,_ambion_human_brain_reference_rna_(hbrr,_catalog_#6050)	NA
GSM122881	GSE5350	maqc_sample_b,_ie,_ambion_human_brain_reference_rna_(hbrr,_catalog_#6050)	NA
GSM122882	GSE5350	maqc_sample_b,_ie,_ambion_human_brain_reference_rna_(hbrr,_catalog_#6050)	NA
GSM122883	GSE5350	maqc_sample_b,_ie,_ambion_human_brain_reference_rna_(hbrr,_catalog_#6050)	NA
GSM122884	GSE5350	maqc_sample_c,_ie,_maqc_samples_a_and_b_mixed_at_75%:25%_ratio_(a:b)	NA
GSM122885	GSE5350	maqc_sample_c,_ie,_maqc_samples_a_and_b_mixed_at_75%:25%_ratio_(a:b)	NA
GSM122886	GSE5350	maqc_sample_c,_ie,_maqc_samples_a_and_b_mixed_at_75%:25%_ratio_(a:b)	NA
GSM122887	GSE5350	maqc_sample_c,_ie,_maqc_samples_a_and_b_mixed_at_75%:25%_ratio_(a:b)	NA
GSM122888	GSE5350	maqc_sample_c,_ie,_maqc_samples_a_and_b_mixed_at_75%:25%_ratio_(a:b)	NA
GSM122889	GSE5350	maqc_sample_d,_ie,_maqc_samples_a_and_b_mixed_at_25%:75%_ratio_(a:b)	NA
GSM122890	GSE5350	maqc_sample_d,_ie,_maqc_samples_a_and_b_mixed_at_25%:75%_ratio_(a:b)	NA
GSM122891	GSE5350	maqc_sample_d,_ie,_maqc_samples_a_and_b_mixed_at_25%:75%_ratio_(a:b)	NA
GSM122892	GSE5350	maqc_sample_d,_ie,_maqc_samples_a_and_b_mixed_at_25%:75%_ratio_(a:b)	NA
GSM122893	GSE5350	maqc_sample_d,_ie,_maqc_samples_a_and_b_mixed_at_25%:75%_ratio_(a:b)	NA
GSM129237	GSE5563	vulva	Gender: female, Age: 33 years, Tissue: normal vulva,
GSM129241	GSE5563	vulva	Gender: female, Age: 54 years, Tissue: normal vulva,
GSM129244	GSE5563	vulva	Gender: female, Age: 23 years, Tissue: normal vulva,
GSM129249	GSE5563	vulva	Gender: female, Age: 16 years, Tissue: normal vulva,
GSM129250	GSE5563	vulva	Gender: female, Age: 37 years, Tissue: normal vulva,
GSM129251	GSE5563	vulva	Gender: female, Age: 38 years, Tissue: normal vulva,
GSM129252	GSE5563	vulva	Gender: female, Age: 54 years, Tissue: normal vulva,
GSM129253	GSE5563	vulva	Gender: female, Age: 43 years, Tissue: normal vulva,
GSM129254	GSE5563	vulva	Gender: female, Age: 43 years, Tissue: normal vulva,
GSM129255	GSE5563	vulva	Gender: female, Age: 41 years, Tissue: normal vulva,
GSM130277	GSE5579	lymphatic_endothelial_cells	NA
GSM134584	GSE5764	breast_ductal_cells	normal tissue from mastectomy specimen from postmenopausal patient with invasive lobular carcinoma (ILC)
GSM134588	GSE5764	breast_ductal_cells	normal tissue from mastectomy specimen from postmenopausal patient with invasive lobular carcinoma (ILC)
GSM134687	GSE5764	breast_ductal_cells	normal tissue from mastectomy specimen from postmenopausal patient with invasive lobular carcinoma (ILC)
GSM134690	GSE5764	breast_ductal_cells	normal tissue from mastectomy specimen from postmenopausal patient with invasive lobular carcinoma (ILC)
GSM134693	GSE5764	breast_ductal_cells	normal tissue from mastectomy specimen from postmenopausal patient with invasive lobular carcinoma (ILC)
GSM134696	GSE5764	breast_ductal_cells	normal tissue from mastectomy specimen from postmenopausal patient with invasive ductal carcinoma (IDC)
GSM134699	GSE5764	breast_ductal_cells	normal tissue from mastectomy specimen from postmenopausal patient with invasive ductal carcinoma (IDC)
GSM134702	GSE5764	breast_ductal_cells	normal tissue from mastectomy specimen from postmenopausal patient with invasive ductal carcinoma (IDC)
GSM134705	GSE5764	breast_ductal_cells	normal tissue from mastectomy specimen from postmenopausal patient with invasive ductal carcinoma (IDC)
GSM134708	GSE5764	breast_ductal_cells	normal tissue from mastectomy specimen from postmenopausal patient with invasive ductal carcinoma (IDC)
GSM135290	GSE5790	macaca_mulatta_blood	healthy adult Rhesus Macaque 5 to 9 years of age
GSM135291	GSE5790	macaca_mulatta_blood	healthy adult Rhesus Macaque 5 to 9 years of age
GSM135292	GSE5790	macaca_mulatta_blood	healthy adult Rhesus Macaque 5 to 9 years of age
GSM135293	GSE5790	macaca_mulatta_blood	healthy adult Rhesus Macaque 5 to 9 years of age
GSM135294	GSE5790	macaca_mulatta_blood	healthy adult Rhesus Macaque 5 to 9 years of age
GSM135295	GSE5790	macaca_mulatta_blood	healthy adult Rhesus Macaque 5 to 9 years of age
GSM135296	GSE5790	macaca_mulatta_blood	healthy adult Rhesus Macaque 5 to 9 years of age
GSM135297	GSE5790	macaca_mulatta_blood	healthy adult Rhesus Macaque 5 to 9 years of age
GSM135298	GSE5790	macaca_mulatta_blood	healthy adult Rhesus Macaque 5 to 9 years of age
GSM136126	GSE5809	uterus	NA
GSM136127	GSE5809	uterus	NA
GSM136128	GSE5809	uterus	NA
GSM138595	GSE6222	liver	NA
GSM138596	GSE6222	liver	NA
GSM139002	GSE6004	thyroid	Tissue: normal thyroid; Gender: male; Age; 71
GSM139003	GSE6004	thyroid	Tissue: normal thyroid; Gender: female; Age; 34
GSM139004	GSE6004	thyroid	Tissue: normal thyroid; Gender: female; Age; 29
GSM139005	GSE6004	thyroid	Tissue: normal thyroid; Gender: female; Age; 21
GSM143717	GSE6257	lymphatic_endothelial_cells	NA
GSM143898	GSE6257	lymphatic_endothelial_cells	NA
GSM143900	GSE6257	lymphatic_endothelial_cells	NA
GSM144081	GSE6283	amniocytes	tissue: prenatal amniocytes;Age: 16 gestational weeks;gender: male;karyotype: normal
GSM144082	GSE6283	amniocytes	tissue: prenatal amniocytes;Age: 16 gestational weeks;gender: male;karyotype: normal
GSM144084	GSE6283	amniocytes	tissue: prenatal amniocytes;Age: 15 gestational weeks;gender: male;karyotype: normal
GSM144087	GSE6283	chorion_villus_cells	tissue: prenatal chorion villus cells;Age: 12 gestational weeks;gender: female;karyotype: normal
GSM144088	GSE6283	chorion_villus_cells	tissue: prenatal chorion villus cells;Age: 12 gestational weeks;gender: female;karyotype: normal
GSM144512	GSE6283	chorion_villus_cells	tissue: prenatal chorion villus cells;Age: 12 gestational weeks;gender: female;karyotype: normal
GSM144513	GSE6283	chorion_villus_cells	tissue: prenatal chorion villus cells;Age: 12 gestational weeks;gender: male;karyotype: normal
GSM144518	GSE6283	chorion_villus_cells	tissue: prenatal chorion villus cells;Age: 12 gestational weeks;gender: female;karyotype: normal
GSM144519	GSE6283	chorion_villus_cells	tissue: prenatal chorion villus cells;Age: 12 gestational weeks;gender: male;karyotype: normal
GSM149638	GSE6565	fetal_cartilage	NA
GSM149639	GSE6565	fetal_cartilage	NA
GSM149640	GSE6565	fetal_cartilage	NA
GSM149641	GSE6565	fetal_cartilage	NA
GSM149642	GSE6565	fetal_cartilage	NA
GSM149643	GSE6565	fetal_cartilage	NA
GSM149644	GSE6565	fetal_cartilage	NA
GSM149645	GSE6565	fetal_cartilage	NA
GSM149646	GSE6565	fetal_cartilage	NA
GSM149647	GSE6565	fetal_cartilage	NA
GSM151958	GSE6573	placenta	NA
GSM151960	GSE6573	adipose_tissue	NA
GSM155631	GSE6798	vastus_lateralis	NA
GSM155643	GSE6798	vastus_lateralis	NA
GSM155644	GSE6798	vastus_lateralis	NA
GSM155665	GSE6791	cervix	Case: Cervical normal;Anatomical sites: Cervix;gender: Female;age: 35;Tumor Stage: -
GSM155666	GSE6791	cervix	Case: Cervical normal;Anatomical sites: Cervix;gender: Female;age: 44;Tumor Stage: -
GSM155667	GSE6791	cervix	Case: Cervical normal;Anatomical sites: Cervix;gender: Female;age: 45;Tumor Stage: -
GSM155668	GSE6791	cervix	Case: Cervical normal;Anatomical sites: Cervix;gender: Female;age: 66;Tumor Stage: -
GSM155669	GSE6791	cervix	Case: Cervical normal;Anatomical sites: Cervix;gender: Female;age: 43;Tumor Stage: -
GSM155670	GSE6791	cervix	Case: Cervical normal;Anatomical sites: Cervix;gender: Female;age: 56;Tumor Stage: -
GSM155671	GSE6791	cervix	Case: Cervical normal;Anatomical sites: Cervix;gender: Female;age: 48;Tumor Stage: -
GSM155672	GSE6791	cervix	Case: Cervical normal;Anatomical sites: Cervix;gender: Female;age: 43;Tumor Stage: -
GSM155715	GSE6791	head_and_neck_epithelial_cells	Case: Head and neck normal;Anatomical sites: tonsil;gender: Female;age: 20;Tumor Stage: -
GSM155716	GSE6791	head_and_neck_epithelial_cells	Case: Head and neck normal;Anatomical sites: uvula and palate;gender: Female;age: 24;Tumor Stage: -
GSM155717	GSE6791	head_and_neck_epithelial_cells	Case: Head and neck normal;Anatomical sites: tonsil;gender: Male;age: 66;Tumor Stage: -
GSM155718	GSE6791	head_and_neck_epithelial_cells	Case: Head and neck normal;Anatomical sites: tonsil;gender: Male;age: 47;Tumor Stage: -
GSM155719	GSE6791	head_and_neck_epithelial_cells	Case: Head and neck normal;Anatomical sites: tonsil;gender: Female;age: 18;Tumor Stage: -
GSM155720	GSE6791	head_and_neck_epithelial_cells	Case: Head and neck normal;Anatomical sites: Oral Cavity;gender: Female;age: 76;Tumor Stage: -
GSM155721	GSE6791	head_and_neck_epithelial_cells	Case: Head and neck normal;Anatomical sites: Oral Cavity;gender: Female;age: 77;Tumor Stage: -
GSM155722	GSE6791	head_and_neck_epithelial_cells	Case: Head and neck normal;Anatomical sites: Oral Cavity;gender: Male;age: 55;Stage: -
GSM155723	GSE6791	head_and_neck_epithelial_cells	Case: Head and neck normal;Anatomical sites: Oral Cavity;gender: Male;age: 62;Stage: -
GSM155724	GSE6791	head_and_neck_epithelial_cells	Case: Head and neck normal;Anatomical sites: Oral Cavity;gender: Female;age: 63;Stage: -
GSM155725	GSE6791	head_and_neck_epithelial_cells	Case: Head and neck normal;Anatomical sites: Oral Cavity;gender: Female;age: 88;Stage: -
GSM155726	GSE6791	head_and_neck_epithelial_cells	Case: Head and neck normal;Anatomical sites: Oral Cavity;gender: Female;age: 54;Stage: -
GSM155727	GSE6791	head_and_neck_epithelial_cells	Case: Head and neck normal;Anatomical sites: Oral Cavity;gender: Male;age: 84;Stage: -
GSM155728	GSE6791	head_and_neck_epithelial_cells	Case: Head and neck normal;Anatomical sites: Oral Cavity;gender: Female;age: 81;Stage: -
GSM155729	GSE6798	vastus_lateralis	NA
GSM155919	GSE6764	liver	NA
GSM155926	GSE6764	liver	NA
GSM155927	GSE6764	liver	NA
GSM155928	GSE6764	liver	NA
GSM155947	GSE6764	liver	NA
GSM155948	GSE6764	liver	NA
GSM155961	GSE6764	liver	NA
GSM155964	GSE6764	liver	NA
GSM155988	GSE6764	liver	NA
GSM155989	GSE6764	liver	NA
GSM156170	GSE6798	vastus_lateralis	NA
GSM156171	GSE6798	vastus_lateralis	NA
GSM156176	GSE6798	vastus_lateralis	NA
GSM156177	GSE6798	vastus_lateralis	NA
GSM156178	GSE6798	vastus_lateralis	NA
GSM156179	GSE6798	vastus_lateralis	NA
GSM156180	GSE6798	vastus_lateralis	NA
GSM156181	GSE6798	vastus_lateralis	NA
GSM156184	GSE6798	vastus_lateralis	NA
GSM158463	GSE6872;GSE6969	sperm	Fertility Status: Fertile
GSM158464	GSE6872;GSE6969	sperm	Fertility Status: Fertile
GSM158465	GSE6872;GSE6969	sperm	Fertility Status: Fertile
GSM158466	GSE6872;GSE6969	sperm	Fertility Status: Fertile
GSM158467	GSE6872;GSE6969	sperm	Fertility Status: Fertile
GSM158468	GSE6872;GSE6969	sperm	Fertility Status: Fertile
GSM158469	GSE6872;GSE6969	sperm	Fertility Status: Fertile
GSM158470	GSE6872;GSE6969	sperm	Fertility Status: Fertile
GSM158471	GSE6872;GSE6969	sperm	Fertility Status: Fertile
GSM158472	GSE6872;GSE6969	sperm	Fertility Status: Fertile
GSM158473	GSE6872;GSE6969	sperm	Fertility Status: Fertile
GSM158474	GSE6872;GSE6969	sperm	Fertility Status: Fertile
GSM158475	GSE6872;GSE6969	sperm	Fertility Status: Fertile
GSM161966	GSE7014	skeletal_muscle	Normal Adult patient, age 61, gender Female
GSM161967	GSE7014	skeletal_muscle	Normal Adult patient, age 85, gender Male
GSM161968	GSE7014	skeletal_muscle	Normal Adult patient, age 43, gender Male
GSM161969	GSE7014	skeletal_muscle	Normal Adult patient, age 43, gender Male
GSM161970	GSE7014	skeletal_muscle	Normal Adult patient, age 26, gender Male
GSM161971	GSE7014	skeletal_muscle	Normal Adult patients pool, age 43-46, gender Male/Female
GSM171006	GSE7116	pbmc	NA
GSM171007	GSE7116	pbmc	NA
GSM171008	GSE7116	pbmc	NA
GSM171009	GSE7116	pbmc	NA
GSM173532	GSE7216	epidermal_keratinocytes	NA
GSM173533	GSE7216	epidermal_keratinocytes	NA
GSM173534	GSE7216	epidermal_keratinocytes	NA
GSM173679	GSE7224	gingival_epithelium	NA
GSM173680	GSE7224	gingival_epithelium	NA
GSM173681	GSE7224	gingival_epithelium	NA
GSM173682	GSE7224	gingival_epithelium	NA
GSM173683	GSE7224	gingival_epithelium	NA
GSM173684	GSE7224	gingival_epithelium	NA
GSM173685	GSE7224	gingival_epithelium	NA
GSM173686	GSE7224	tonsil_epithelium	NA
GSM173687	GSE7224	tonsil_epithelium	NA
GSM173688	GSE7224	tonsil_epithelium	NA
GSM173689	GSE7224	tonsil_epithelium	NA
GSM173690	GSE7224	tonsil_epithelium	NA
GSM173691	GSE7224	tonsil_epithelium	NA
GSM175776	GSE7305	endometrium	Menstrual phase - Follicular
GSM175777	GSE7305	endometrium	Menstrual phase - Follicular
GSM175778	GSE7305	endometrium	Menstrual phase - Luteal
GSM175779	GSE7305	endometrium	Menstrual phase - Luteal
GSM175780	GSE7305	endometrium	Menstrual phase - Follicular
GSM175781	GSE7305	endometrium	Menstrual phase - Follicular
GSM175782	GSE7305	endometrium	Menstrual phase - Follicular
GSM175783	GSE7305	endometrium	Menstrual phase - Follicular
GSM175784	GSE7305	endometrium	Menstrual phase - Follicular
GSM175785	GSE7305	endometrium	Menstrual phase - Follicular
GSM175789	GSE7307	ovary	Tissue/Cell Line [C]: ovary;Disease/Normal or Treatment [C]: normal;Gender: F;Disease type: Normal
GSM175792	GSE7307	breast	Tissue/Cell Line [C]: breast;Disease/Normal or Treatment [C]: normal;Gender: F;Disease type: Normal
GSM175795	GSE7307	breast	Tissue/Cell Line [C]: breast;Disease/Normal or Treatment [C]: normal;Gender: F;Disease type: Normal
GSM175810	GSE7307	synovial_membrane	Tissue/Cell Line [C]: synovial membrane;Disease/Normal or Treatment [C]: normal;Gender:;Disease type: Normal
GSM175811	GSE7307	synovial_membrane	Tissue/Cell Line [C]: synovial membrane;Disease/Normal or Treatment [C]: normal;Gender:;Disease type: Normal
GSM175812	GSE7307	synovial_membrane	Tissue/Cell Line [C]: synovial membrane;Disease/Normal or Treatment [C]: normal;Gender:;Disease type: Normal
GSM175814	GSE7307	heart_atrium	Tissue/Cell Line [C]: heart_atrium;Disease/Normal or Treatment [C]: normal;Gender: M;Disease type: Normal
GSM175815	GSE7307	heart_atrium	Tissue/Cell Line [C]: heart_atrium;Disease/Normal or Treatment [C]: normal;Gender: F;Disease type: Normal
GSM175816	GSE7307	heart_atrium	Tissue/Cell Line [C]: heart_atrium;Disease/Normal or Treatment [C]: normal;Gender: M;Disease type: Normal
GSM175817	GSE7307	heart_ventricle	Tissue/Cell Line [C]: heart_ventricle;Disease/Normal or Treatment [C]: normal;Gender: M;Disease type: Normal
GSM175818	GSE7307	heart_ventricle	Tissue/Cell Line [C]: heart_ventricle;Disease/Normal or Treatment [C]: normal;Gender: M;Disease type: Normal
GSM175819	GSE7307	heart_ventricle	Tissue/Cell Line [C]: heart_ventricle;Disease/Normal or Treatment [C]: normal;Gender: F;Disease type: Normal
GSM175820	GSE7307	coronary_artery	Tissue/Cell Line [C]: coronary_artery;Disease/Normal or Treatment [C]: normal;Gender: M;Disease type: Normal
GSM175821	GSE7307	coronary_artery	Tissue/Cell Line [C]: coronary_artery;Disease/Normal or Treatment [C]: normal;Gender: M;Disease type: Normal
GSM175822	GSE7307	stomach_cardiac	Tissue/Cell Line [C]: stomach_cardiac;Disease/Normal or Treatment [C]: normal;Gender: M;Disease type: Normal
GSM175823	GSE7307	stomach_cardiac	Tissue/Cell Line [C]: stomach_cardiac;Disease/Normal or Treatment [C]: normal;Gender: F;Disease type: Normal
GSM175824	GSE7307	stomach_cardiac	Tissue/Cell Line [C]: stomach_cardiac;Disease/Normal or Treatment [C]: normal;Gender: M;Disease type: Normal
GSM175825	GSE7307	dorsal_root_ganglia	Tissue/Cell Line [C]: dorsal_root_ganglia;Disease/Normal or Treatment [C]: normal;Gender: M;Disease type: Normal
GSM175826	GSE7307	dorsal_root_ganglia	Tissue/Cell Line [C]: dorsal_root_ganglia;Disease/Normal or Treatment [C]: normal;Gender: M;Disease type: Normal
GSM175827	GSE7307	dorsal_root_ganglia	Tissue/Cell Line [C]: dorsal_root_ganglia;Disease/Normal or Treatment [C]: normal;Gender: F;Disease type: Normal
GSM175828	GSE7307	dorsal_root_ganglia	Tissue/Cell Line [C]: dorsal_root_ganglia;Disease/Normal or Treatment [C]: normal;Gender: M;Disease type: Normal
GSM175829	GSE7307	ventral_tegmental_area	Tissue/Cell Line [C]: ventral_tegmental_area;Disease/Normal or Treatment [C]: normal;Gender: M;Disease type: Normal
GSM175830	GSE7307	ventral_tegmental_area	Tissue/Cell Line [C]: ventral_tegmental_area;Disease/Normal or Treatment [C]: normal;Gender: M;Disease type: Normal
GSM175831	GSE7307	ventral_tegmental_area	Tissue/Cell Line [C]: ventral_tegmental_area;Disease/Normal or Treatment [C]: normal;Gender: F;Disease type: Normal
GSM175832	GSE7307	ventral_tegmental_area	Tissue/Cell Line [C]: ventral_tegmental_area;Disease/Normal or Treatment [C]: normal;Gender: M;Disease type: Normal
GSM175833	GSE7307	cervix	Tissue/Cell Line [C]: cervix;Disease/Normal or Treatment [C]: normal;Gender: F;Disease type: Normal
GSM175834	GSE7307	adipose_tissue_omental	Tissue/Cell Line [C]: adipose_tissue_omental;Disease/Normal or Treatment [C]: normal;Gender: M;Disease type: Normal
GSM175835	GSE7307	adipose_tissue_omental	Tissue/Cell Line [C]: adipose_tissue_omental;Disease/Normal or Treatment [C]: normal;Gender: M;Disease type: Normal
GSM175836	GSE7307	adipose_tissue_omental	Tissue/Cell Line [C]: adipose_tissue_omental;Disease/Normal or Treatment [C]: normal;Gender: F;Disease type: Normal
GSM175837	GSE7307	adipose_tissue_omental	Tissue/Cell Line [C]: adipose_tissue_omental;Disease/Normal or Treatment [C]: normal;Gender: M;Disease type: Normal
GSM175838	GSE7307	nipple_cross_section	Tissue/Cell Line [C]: nipple_cross_section;Disease/Normal or Treatment [C]: normal;Gender: M;Disease type: Normal
GSM175839	GSE7307	nipple_cross_section	Tissue/Cell Line [C]: nipple_cross_section;Disease/Normal or Treatment [C]: normal;Gender: M;Disease type: Normal
GSM175840	GSE7307	nipple_cross_section	Tissue/Cell Line [C]: nipple_cross_section;Disease/Normal or Treatment [C]: normal;Gender: F;Disease type: Normal
GSM175841	GSE7307	nipple_cross_section	Tissue/Cell Line [C]: nipple_cross_section;Disease/Normal or Treatment [C]: normal;Gender: M;Disease type: Normal
GSM175842	GSE7307	amygdala	Tissue/Cell Line [C]: amygdala;Disease/Normal or Treatment [C]: normal;Gender: M;Disease type: Normal
GSM175843	GSE7307	amygdala	Tissue/Cell Line [C]: amygdala;Disease/Normal or Treatment [C]: normal;Gender: M;Disease type: Normal
GSM175844	GSE7307	amygdala	Tissue/Cell Line [C]: amygdala;Disease/Normal or Treatment [C]: normal;Gender: F;Disease type: Normal
GSM175845	GSE7307	amygdala	Tissue/Cell Line [C]: amygdala;Disease/Normal or Treatment [C]: normal;Gender: M;Disease type: Normal
GSM175846	GSE7307	putamen	Tissue/Cell Line [C]: putamen;Disease/Normal or Treatment [C]: normal;Gender: M;Disease type: Normal
GSM175847	GSE7307	putamen	Tissue/Cell Line [C]: putamen;Disease/Normal or Treatment [C]: normal;Gender: M;Disease type: Normal
GSM175848	GSE7307	putamen	Tissue/Cell Line [C]: putamen;Disease/Normal or Treatment [C]: normal;Gender: M;Disease type: Normal
GSM175849	GSE7307	accumbens	Tissue/Cell Line [C]: accumbens;Disease/Normal or Treatment [C]: normal;Gender: M;Disease type: Normal
GSM175850	GSE7307	accumbens	Tissue/Cell Line [C]: accumbens;Disease/Normal or Treatment [C]: normal;Gender: M;Disease type: Normal
GSM175851	GSE7307	accumbens	Tissue/Cell Line [C]: accumbens;Disease/Normal or Treatment [C]: normal;Gender: F;Disease type: Normal
GSM175852	GSE7307	cerebellum	Tissue/Cell Line [C]: cerebellum;Disease/Normal or Treatment [C]: normal;Gender: M;Disease type: Normal
GSM175853	GSE7307	cerebellum	Tissue/Cell Line [C]: cerebellum;Disease/Normal or Treatment [C]: normal;Gender: M;Disease type: Normal
GSM175854	GSE7307	cerebellum	Tissue/Cell Line [C]: cerebellum;Disease/Normal or Treatment [C]: normal;Gender: M;Disease type: Normal
GSM175855	GSE7307	corpus_callosum	Tissue/Cell Line [C]: corpus_callosum;Disease/Normal or Treatment [C]: normal;Gender: M;Disease type: Normal
GSM175856	GSE7307	corpus_callosum	Tissue/Cell Line [C]: corpus_callosum;Disease/Normal or Treatment [C]: normal;Gender: M;Disease type: Normal
GSM175857	GSE7307	corpus_callosum	Tissue/Cell Line [C]: corpus_callosum;Disease/Normal or Treatment [C]: normal;Gender: F;Disease type: Normal
GSM175858	GSE7307	corpus_callosum	Tissue/Cell Line [C]: corpus_callosum;Disease/Normal or Treatment [C]: normal;Gender: M;Disease type: Normal
GSM175859	GSE7307	frontal_lobe	Tissue/Cell Line [C]: frontal_lobe;Disease/Normal or Treatment [C]: normal;Gender: M;Disease type: Normal
GSM175860	GSE7307	frontal_lobe	Tissue/Cell Line [C]: frontal_lobe;Disease/Normal or Treatment [C]: normal;Gender: F;Disease type: Normal
GSM175861	GSE7307	hippocampus	Tissue/Cell Line [C]: hippocampus;Disease/Normal or Treatment [C]: normal;Gender: F;Disease type: Normal
GSM175862	GSE7307	parietal_lobe	Tissue/Cell Line [C]: parietal_lobe;Disease/Normal or Treatment [C]: normal;Gender: M;Disease type: Normal
GSM175863	GSE7307	parietal_lobe	Tissue/Cell Line [C]: parietal_lobe;Disease/Normal or Treatment [C]: normal;Gender: M;Disease type: Normal
GSM175864	GSE7307	parietal_lobe	Tissue/Cell Line [C]: parietal_lobe;Disease/Normal or Treatment [C]: normal;Gender: F;Disease type: Normal
GSM175865	GSE7307	spinal_cord	Tissue/Cell Line [C]: spinal_cord;Disease/Normal or Treatment [C]: normal;Gender: M;Disease type: Normal
GSM175866	GSE7307	spinal_cord	Tissue/Cell Line [C]: spinal_cord;Disease/Normal or Treatment [C]: normal;Gender: M;Disease type: Normal
GSM175867	GSE7307	spinal_cord	Tissue/Cell Line [C]: spinal_cord;Disease/Normal or Treatment [C]: normal;Gender: F;Disease type: Normal
GSM175868	GSE7307	spinal_cord	Tissue/Cell Line [C]: spinal_cord;Disease/Normal or Treatment [C]: normal;Gender: M;Disease type: Normal
GSM175869	GSE7307	subthalamic_nucleus	Tissue/Cell Line [C]: subthalamic_nucleus;Disease/Normal or Treatment [C]: normal;Gender: M;Disease type: Normal
GSM175870	GSE7307	subthalamic_nucleus	Tissue/Cell Line [C]: subthalamic_nucleus;Disease/Normal or Treatment [C]: normal;Gender: F;Disease type: Normal
GSM175871	GSE7307	substantia_nigra	Tissue/Cell Line [C]: substantia_nigra;Disease/Normal or Treatment [C]: normal;Gender: M;Disease type: Normal
GSM175872	GSE7307	substantia_nigra	Tissue/Cell Line [C]: substantia_nigra;Disease/Normal or Treatment [C]: normal;Gender: M;Disease type: Normal
GSM175873	GSE7307	substantia_nigra	Tissue/Cell Line [C]: substantia_nigra;Disease/Normal or Treatment [C]: normal;Gender: F;Disease type: Normal
GSM175874	GSE7307	temporal_lobe	Tissue/Cell Line [C]: temporal_lobe;Disease/Normal or Treatment [C]: normal;Gender: M;Disease type: Normal
GSM175875	GSE7307	temporal_lobe	Tissue/Cell Line [C]: temporal_lobe;Disease/Normal or Treatment [C]: normal;Gender: M;Disease type: Normal
GSM175876	GSE7307	temporal_lobe	Tissue/Cell Line [C]: temporal_lobe;Disease/Normal or Treatment [C]: normal;Gender: F;Disease type: Normal
GSM175877	GSE7307	temporal_lobe	Tissue/Cell Line [C]: temporal_lobe;Disease/Normal or Treatment [C]: normal;Gender: M;Disease type: Normal
GSM175878	GSE7307	vagina	Tissue/Cell Line [C]: vagina;Disease/Normal or Treatment [C]: normal;Gender: F;Disease type: Normal
GSM175879	GSE7307	saphenous_vein	Tissue/Cell Line [C]: saphenous_vein;Disease/Normal or Treatment [C]: normal;Gender: M;Disease type: Normal
GSM175880	GSE7307	saphenous_vein	Tissue/Cell Line [C]: saphenous_vein;Disease/Normal or Treatment [C]: normal;Gender: F;Disease type: Normal
GSM175881	GSE7307	penis	Tissue/Cell Line [C]: penis;Disease/Normal or Treatment [C]: normal;Gender: M;Disease type: Normal
GSM175882	GSE7307	skeletal_muscle	Tissue/Cell Line [C]: skeletal_muscle;Disease/Normal or Treatment [C]: normal;Gender: M;Disease type: Normal
GSM175883	GSE7307	skeletal_muscle	Tissue/Cell Line [C]: skeletal_muscle;Disease/Normal or Treatment [C]: normal;Gender: F;Disease type: Normal
GSM175884	GSE7307	skeletal_muscle	Tissue/Cell Line [C]: skeletal_muscle;Disease/Normal or Treatment [C]: normal;Gender: M;Disease type: Normal
GSM175885	GSE7307	thalamus	Tissue/Cell Line [C]: thalamus;Disease/Normal or Treatment [C]: normal;Gender: M;Disease type: Normal
GSM175886	GSE7307	thalamus	Tissue/Cell Line [C]: thalamus;Disease/Normal or Treatment [C]: normal;Gender: M;Disease type: Normal
GSM175887	GSE7307	thalamus	Tissue/Cell Line [C]: thalamus;Disease/Normal or Treatment [C]: normal;Gender: F;Disease type: Normal
GSM175888	GSE7307	thalamus	Tissue/Cell Line [C]: thalamus;Disease/Normal or Treatment [C]: normal;Gender: M;Disease type: Normal
GSM175889	GSE7307	trigeminal_ganglia	Tissue/Cell Line [C]: trigeminal_ganglia;Disease/Normal or Treatment [C]: normal;Gender: M;Disease type: Normal
GSM175890	GSE7307	trigeminal_ganglia	Tissue/Cell Line [C]: trigeminal_ganglia;Disease/Normal or Treatment [C]: normal;Gender: M;Disease type: Normal
GSM175891	GSE7307	trigeminal_ganglia	Tissue/Cell Line [C]: trigeminal_ganglia;Disease/Normal or Treatment [C]: normal;Gender: F;Disease type: Normal
GSM175892	GSE7307	trigeminal_ganglia	Tissue/Cell Line [C]: trigeminal_ganglia;Disease/Normal or Treatment [C]: normal;Gender: M;Disease type: Normal
GSM175893	GSE7307	vestibular_nuclei_superior	Tissue/Cell Line [C]: vestibular_nuclei_superior;Disease/Normal or Treatment [C]: normal;Gender: M;Disease type: Normal
GSM175894	GSE7307	vestibular_nuclei_superior	Tissue/Cell Line [C]: vestibular_nuclei_superior;Disease/Normal or Treatment [C]: normal;Gender: F;Disease type: Normal
GSM175895	GSE7307	vestibular_nuclei_superior	Tissue/Cell Line [C]: vestibular_nuclei_superior;Disease/Normal or Treatment [C]: normal;Gender: M;Disease type: Normal
GSM175896	GSE7307	tongue_superior	Tissue/Cell Line [C]: tongue_superior_part_w/_papillae;Disease/Normal or Treatment [C]: normal;Gender: M;Disease type: Normal
GSM175897	GSE7307	tongue_superior	Tissue/Cell Line [C]: tongue_superior_part_w/_papillae;Disease/Normal or Treatment [C]: normal;Gender: M;Disease type: Normal
GSM175898	GSE7307	tongue_superior	Tissue/Cell Line [C]: tongue_superior_part_w/_papillae;Disease/Normal or Treatment [C]: normal;Gender: F;Disease type: Normal
GSM175899	GSE7307	tongue_superior	Tissue/Cell Line [C]: tongue_superior_part_w/_papillae;Disease/Normal or Treatment [C]: normal;Gender: M;Disease type: Normal
GSM175900	GSE7307	tongue_main_corpus	Tissue/Cell Line [C]: tongue_main_corpus;Disease/Normal or Treatment [C]: normal;Gender: F;Disease type: Normal
GSM175901	GSE7307	midbrain	Tissue/Cell Line [C]: midbrain;Disease/Normal or Treatment [C]: normal;Gender: M;Disease type: Normal
GSM175902	GSE7307	midbrain	Tissue/Cell Line [C]: midbrain;Disease/Normal or Treatment [C]: normal;Gender: M;Disease type: Normal
GSM175903	GSE7307	midbrain	Tissue/Cell Line [C]: midbrain;Disease/Normal or Treatment [C]: normal;Gender: F;Disease type: Normal
GSM175904	GSE7307	midbrain	Tissue/Cell Line [C]: midbrain;Disease/Normal or Treatment [C]: normal;Gender: M;Disease type: Normal
GSM175905	GSE7307	colon	Tissue/Cell Line [C]: colon;Disease/Normal or Treatment [C]: normal;Gender: M/F mix;Disease type: Normal
GSM175906	GSE7307	bone_marrow	Tissue/Cell Line [C]: bone_marrow;Disease/Normal or Treatment [C]: normal;Gender: M/F mix;Disease type: Normal
GSM175907	GSE7307	cerebellum	Tissue/Cell Line [C]: cerebellum;Disease/Normal or Treatment [C]: normal;Gender: M/F mix;Disease type: Normal
GSM175908	GSE7307	small_intestine	Tissue/Cell Line [C]: small_intestine;Disease/Normal or Treatment [C]: normal;Gender: M/F mix;Disease type: Normal
GSM175911	GSE7307	kidney	Tissue/Cell Line [C]: kidney;Disease/Normal or Treatment [C]: normal;Gender: M/F mix;Disease type: Normal
GSM175923	GSE7307	prostate	Tissue/Cell Line [C]: prostate gland;Disease/Normal or Treatment [C]: normal;Gender: M;Disease type: Normal
GSM175924	GSE7307	prostate	Tissue/Cell Line [C]: prostate gland;Disease/Normal or Treatment [C]: normal;Gender: M;Disease type: Normal
GSM175925	GSE7307	prostate	Tissue/Cell Line [C]: prostate gland;Disease/Normal or Treatment [C]: normal;Gender: M;Disease type: Normal
GSM175926	GSE7307	prostate	Tissue/Cell Line [C]: prostate gland;Disease/Normal or Treatment [C]: normal;Gender: M;Disease type: Normal
GSM175927	GSE7307	prostate	Tissue/Cell Line [C]: prostate gland;Disease/Normal or Treatment [C]: normal;Gender: M;Disease type: Normal
GSM175928	GSE7307	prostate	Tissue/Cell Line [C]: prostate gland;Disease/Normal or Treatment [C]: normal;Gender: M;Disease type: Normal
GSM175935	GSE7307	heart	Tissue/Cell Line [C]: heart;Disease/Normal or Treatment [C]: normal;Gender: M/F mix;Disease type: Normal
GSM175936	GSE7307	spinal_cord	Tissue/Cell Line [C]: spinal_cord;Disease/Normal or Treatment [C]: normal;Gender: M/F mix;Disease type: Normal
GSM175937	GSE7307	placenta	Tissue/Cell Line [C]: placenta;Disease/Normal or Treatment [C]: normal;Gender: M/F mix;Disease type: Normal
GSM175938	GSE7307	prostate	Tissue/Cell Line [C]: prostate_gland;Disease/Normal or Treatment [C]: normal;Gender: M/F mix;Disease type: Normal
GSM175939	GSE7307	salivary_gland	Tissue/Cell Line [C]: salivary_gland;Disease/Normal or Treatment [C]: normal;Gender: M/F mix;Disease type: Normal
GSM175940	GSE7307	skeletal_muscle	Tissue/Cell Line [C]: skeletal_muscle;Disease/Normal or Treatment [C]: normal;Gender: M/F mix;Disease type: Normal
GSM175941	GSE7307	spleen	Tissue/Cell Line [C]: spleen;Disease/Normal or Treatment [C]: normal;Gender: M/F mix;Disease type: Normal
GSM175942	GSE7307	testes	Tissue/Cell Line [C]: testes;Disease/Normal or Treatment [C]: normal;Gender: M/F mix;Disease type: Normal
GSM175943	GSE7307	stomach	Tissue/Cell Line [C]: stomach;Disease/Normal or Treatment [C]: normal;Gender: M/F mix;Disease type: Normal
GSM175944	GSE7307	trachea	Tissue/Cell Line [C]: trachea;Disease/Normal or Treatment [C]: normal;Gender: M/F mix;Disease type: Normal
GSM175945	GSE7307	uterus	Tissue/Cell Line [C]: uterus;Disease/Normal or Treatment [C]: normal;Gender: M/F mix;Disease type: Normal
GSM175947	GSE7307	small_intestine	Tissue/Cell Line [C]: small_intestine;Disease/Normal or Treatment [C]: normal;Gender: M/F mix;Disease type: Normal
GSM175948	GSE7307	skin	Tissue/Cell Line [C]: skin;Disease/Normal or Treatment [C]: normal;Gender: M/F mix;Disease type: Normal
GSM175949	GSE7307	small_intestine	Tissue/Cell Line [C]: small_intestine_duodenum;Disease/Normal or Treatment [C]: normal;Gender:;Disease type: Normal
GSM175950	GSE7307	pancreas	Tissue/Cell Line [C]: pancreas;Disease/Normal or Treatment [C]: normal;Gender:;Disease type: Normal
GSM175951	GSE7307	bone_marrow	Tissue/Cell Line [C]: bone_marrow;Disease/Normal or Treatment [C]: normal;Gender:;Disease type: Normal
GSM175952	GSE7307	skin	Tissue/Cell Line [C]: skin;Disease/Normal or Treatment [C]: normal;Gender:;Disease type: Normal
GSM175954	GSE7307	thyroid	Tissue/Cell Line [C]: thyroid_gland;Disease/Normal or Treatment [C]: normal;Gender: M/F mix;Disease type: Normal
GSM175955	GSE7307	prostate	Tissue/Cell Line [C]: prostate gland;Disease/Normal or Treatment [C]: normal;Gender: M;Disease type: Normal
GSM175956	GSE7307	midbrain	Tissue/Cell Line [C]: midbrain;Disease/Normal or Treatment [C]: normal;Gender: M;Disease type: Normal
GSM175957	GSE7307	midbrain	Tissue/Cell Line [C]: midbrain;Disease/Normal or Treatment [C]: normal;Gender: M;Disease type: Normal
GSM175958	GSE7307	midbrain	Tissue/Cell Line [C]: midbrain;Disease/Normal or Treatment [C]: normal;Gender: F;Disease type: Normal
GSM175959	GSE7307	midbrain	Tissue/Cell Line [C]: midbrain;Disease/Normal or Treatment [C]: normal;Gender: F;Disease type: Normal
GSM175967	GSE7307	skin	Tissue/Cell Line [C]: skin;Disease/Normal or Treatment [C]: normal;Gender: M;Disease type: Normal
GSM175973	GSE7307	thymus	Tissue/Cell Line [C]: thymus_gland;Disease/Normal or Treatment [C]: normal;Gender: M;Disease type: Normal
GSM175974	GSE7307	bone_marrow	Tissue/Cell Line [C]: bone_marrow;Disease/Normal or Treatment [C]: normal;Gender: M;Disease type: Normal
GSM175975	GSE7307	bone_marrow	Tissue/Cell Line [C]: bone_marrow;Disease/Normal or Treatment [C]: normal;Gender: M;Disease type: Normal
GSM175976	GSE7307	tonsil	Tissue/Cell Line [C]: tonsil;Disease/Normal or Treatment [C]: normal;Gender: F;Disease type: Normal
GSM175977	GSE7307	lung	Tissue/Cell Line [C]: lung;Disease/Normal or Treatment [C]: normal;Gender: F;Disease type: Normal
GSM175978	GSE7307	bronchus	Tissue/Cell Line [C]: bronchus;Disease/Normal or Treatment [C]: normal;Gender: M;Disease type: Normal
GSM175979	GSE7307	bronchus	Tissue/Cell Line [C]: bronchus;Disease/Normal or Treatment [C]: normal;Gender: F;Disease type: Normal
GSM175980	GSE7307	trachea	Tissue/Cell Line [C]: trachea;Disease/Normal or Treatment [C]: normal;Gender: M;Disease type: Normal
GSM175981	GSE7307	trachea	Tissue/Cell Line [C]: trachea;Disease/Normal or Treatment [C]: normal;Gender: F;Disease type: Normal
GSM175982	GSE7307	jejunal_tissue	Tissue/Cell Line [C]: small_intestine_jejunum;Disease/Normal or Treatment [C]: normal;Gender: F;Disease type: Normal
GSM175983	GSE7307	colon_cecum	Tissue/Cell Line [C]: colon_cecum;Disease/Normal or Treatment [C]: normal;Gender: M;Disease type: Normal
GSM175984	GSE7307	colon_cecum	Tissue/Cell Line [C]: colon_cecum;Disease/Normal or Treatment [C]: normal;Gender: F;Disease type: Normal
GSM175987	GSE7307	hippocampus	Tissue/Cell Line [C]: hippocampus;Disease/Normal or Treatment [C]: normal;Gender: M;Disease type: Normal
GSM175988	GSE7307	hippocampus	Tissue/Cell Line [C]: hippocampus;Disease/Normal or Treatment [C]: normal;Gender: M;Disease type: Normal
GSM175989	GSE7307	medulla	Tissue/Cell Line [C]: medulla;Disease/Normal or Treatment [C]: normal;Gender: M;Disease type: Normal
GSM175990	GSE7307	medulla	Tissue/Cell Line [C]: medulla;Disease/Normal or Treatment [C]: normal;Gender: F;Disease type: Normal
GSM175991	GSE7307	pharyngeal_mucosa	Tissue/Cell Line [C]: pharyngeal_mucosa;Disease/Normal or Treatment [C]: normal;Gender: M;Disease type: Normal
GSM175992	GSE7307	pharyngeal_mucosa	Tissue/Cell Line [C]: pharyngeal_mucosa;Disease/Normal or Treatment [C]: normal;Gender: F;Disease type: Normal
GSM175993	GSE7307	skin	Tissue/Cell Line [C]: skin;Disease/Normal or Treatment [C]: normal;Gender: M;Disease type: Normal
GSM175994	GSE7307	adipose_tissue	Tissue/Cell Line [C]: adipose_tissue;Disease/Normal or Treatment [C]: normal;Gender: F;Disease type: Normal
GSM175998	GSE7307	skin	Tissue/Cell Line [C]: skin;Disease/Normal or Treatment [C]: normal;Gender:;Disease type: Normal
GSM176011	GSE7307	saphenous_vein	Tissue/Cell Line [C]: saphenous_vein;Disease/Normal or Treatment [C]: normal;Gender: M;Disease type: Normal
GSM176012	GSE7307	lung	Tissue/Cell Line [C]: lung;Disease/Normal or Treatment [C]: normal;Gender: M;Disease type: Normal
GSM176013	GSE7307	pharyngeal_mucosa	Tissue/Cell Line [C]: pharyngeal_mucosa;Disease/Normal or Treatment [C]: normal;Gender: M;Disease type: Normal
GSM176014	GSE7307	tongue_main_corpus	Tissue/Cell Line [C]: tongue_main_corpus;Disease/Normal or Treatment [C]: normal;Gender: M;Disease type: Normal
GSM176015	GSE7307	tonsil	Tissue/Cell Line [C]: tonsil;Disease/Normal or Treatment [C]: normal;Gender: M;Disease type: Normal
GSM176016	GSE7307	aorta	Tissue/Cell Line [C]: aorta;Disease/Normal or Treatment [C]: normal;Gender: M;Disease type: Normal
GSM176017	GSE7307	frontal_lobe	Tissue/Cell Line [C]: frontal_lobe;Disease/Normal or Treatment [C]: normal;Gender: M;Disease type: Normal
GSM176018	GSE7307	medulla	Tissue/Cell Line [C]: medulla;Disease/Normal or Treatment [C]: normal;Gender: M;Disease type: Normal
GSM176019	GSE7307	tongue_main_corpus	Tissue/Cell Line [C]: tongue_main_corpus;Disease/Normal or Treatment [C]: normal;Gender: M;Disease type: Normal
GSM176020	GSE7307	putamen	Tissue/Cell Line [C]: putamen;Disease/Normal or Treatment [C]: normal;Gender: F;Disease type: Normal
GSM176021	GSE7307	lung	Tissue/Cell Line [C]: lung;Disease/Normal or Treatment [C]: normal;Gender: M;Disease type: Normal
GSM176022	GSE7307	bronchus	Tissue/Cell Line [C]: bronchus;Disease/Normal or Treatment [C]: normal;Gender: M;Disease type: Normal
GSM176023	GSE7307	trachea	Tissue/Cell Line [C]: trachea;Disease/Normal or Treatment [C]: normal;Gender: M;Disease type: Normal
GSM176024	GSE7307	medulla	Tissue/Cell Line [C]: medulla;Disease/Normal or Treatment [C]: normal;Gender: M;Disease type: Normal
GSM176025	GSE7307	pharyngeal_mucosa	Tissue/Cell Line [C]: pharyngeal_mucosa;Disease/Normal or Treatment [C]: normal;Gender: M;Disease type: Normal
GSM176026	GSE7307	synovium	Tissue/Cell Line [C]: joint_tissue_synovium;Disease/Normal or Treatment [C]: normal;Gender: M;Disease type: Normal
GSM176027	GSE7307	adipose_tissue	Tissue/Cell Line [C]: adipose_tissue;Disease/Normal or Treatment [C]: normal;Gender: M;Disease type: Normal
GSM176028	GSE7307	adipose_tissue	Tissue/Cell Line [C]: adipose_tissue_subcutaneous;Disease/Normal or Treatment [C]: normal;Gender: M;Disease type: Normal
GSM176029	GSE7307	tongue_main_corpus	Tissue/Cell Line [C]: tongue_main_corpus;Disease/Normal or Treatment [C]: normal;Gender: M;Disease type: Normal
GSM176032	GSE7307	fallopian_tube	Tissue/Cell Line [C]: fallopian_tube;Disease/Normal or Treatment [C]: normal;Gender: F;Disease type: Normal
GSM176033	GSE7307	cortex	Tissue/Cell Line [C]: frontal_cortex;Disease/Normal or Treatment [C]: normal;Gender:;Disease type: Normal
GSM176037	GSE7307	prefrontal_cortex	Tissue/Cell Line [C]: prefrontal_cortex;Disease/Normal or Treatment [C]: normal;Gender:;Disease type: Normal
GSM176039	GSE7307	endometrium	Tissue/Cell Line [C]: endometrium;Disease/Normal or Treatment [C]: normal;Gender: F;Disease type: Normal
GSM176040	GSE7307	myometrium	Tissue/Cell Line [C]: myometrium;Disease/Normal or Treatment [C]: normal;Gender: F;Disease type: Normal
GSM176041	GSE7307	endometrium	Tissue/Cell Line [C]: endometrium;Disease/Normal or Treatment [C]: normal;Gender: F;Disease type: Normal
GSM176043	GSE7307	endometrium	Tissue/Cell Line [C]: endometrium;Disease/Normal or Treatment [C]: normal;Gender: F;Disease type: Normal
GSM176045	GSE7307	amygdala	Tissue/Cell Line [C]: amygdala;Disease/Normal or Treatment [C]: normal;Gender: M;Disease type: Normal
GSM176046	GSE7307	putamen	Tissue/Cell Line [C]: putamen;Disease/Normal or Treatment [C]: normal;Gender: M;Disease type: Normal
GSM176047	GSE7307	accumbens	Tissue/Cell Line [C]: accumbens;Disease/Normal or Treatment [C]: normal;Gender: M;Disease type: Normal
GSM176048	GSE7307	cerebellum	Tissue/Cell Line [C]: cerebellum;Disease/Normal or Treatment [C]: normal;Gender: M;Disease type: Normal
GSM176049	GSE7307	cortex	Tissue/Cell Line [C]: cerebral_cortex;Disease/Normal or Treatment [C]: normal;Gender: M;Disease type: Normal
GSM176050	GSE7307	corpus_callosum	Tissue/Cell Line [C]: corpus_callosum;Disease/Normal or Treatment [C]: normal;Gender: M;Disease type: Normal
GSM176051	GSE7307	frontal_lobe	Tissue/Cell Line [C]: frontal_lobe;Disease/Normal or Treatment [C]: normal;Gender: M;Disease type: Normal
GSM176052	GSE7307	hippocampus	Tissue/Cell Line [C]: hippocampus;Disease/Normal or Treatment [C]: normal;Gender: M;Disease type: Normal
GSM176053	GSE7307	parietal_lobe	Tissue/Cell Line [C]: parietal_lobe;Disease/Normal or Treatment [C]: normal;Gender: M;Disease type: Normal
GSM176054	GSE7307	medulla	Tissue/Cell Line [C]: medulla;Disease/Normal or Treatment [C]: normal;Gender: M;Disease type: Normal
GSM176055	GSE7307	nodose_nucleus	Tissue/Cell Line [C]: nodose_nucleus;Disease/Normal or Treatment [C]: normal;Gender: M;Disease type: Normal
GSM176056	GSE7307	occipital_lobe	Tissue/Cell Line [C]: occipital_lobe;Disease/Normal or Treatment [C]: normal;Gender: M;Disease type: Normal
GSM176057	GSE7307	spinal_cord	Tissue/Cell Line [C]: spinal_cord;Disease/Normal or Treatment [C]: normal;Gender: M;Disease type: Normal
GSM176058	GSE7307	subthalamic_nucleus	Tissue/Cell Line [C]: subthalamic_nucleus;Disease/Normal or Treatment [C]: normal;Gender: M;Disease type: Normal
GSM176059	GSE7307	substantia_nigra	Tissue/Cell Line [C]: substantia_nigra;Disease/Normal or Treatment [C]: normal;Gender: M;Disease type: Normal
GSM176060	GSE7307	temporal_lobe	Tissue/Cell Line [C]: temporal_lobe;Disease/Normal or Treatment [C]: normal;Gender: M;Disease type: Normal
GSM176061	GSE7307	thalamus	Tissue/Cell Line [C]: thalamus;Disease/Normal or Treatment [C]: normal;Gender: M;Disease type: Normal
GSM176062	GSE7307	dorsal_root_ganglia	Tissue/Cell Line [C]: dorsal_root_ganglia;Disease/Normal or Treatment [C]: normal;Gender: M;Disease type: Normal
GSM176063	GSE7307	trigeminal_ganglia	Tissue/Cell Line [C]: trigeminal_ganglia;Disease/Normal or Treatment [C]: normal;Gender: M;Disease type: Normal
GSM176064	GSE7307	ventral_tegmental_area	Tissue/Cell Line [C]: ventral_tegmental_area;Disease/Normal or Treatment [C]: normal;Gender: M;Disease type: Normal
GSM176065	GSE7307	subthalamic_nucleus	Tissue/Cell Line [C]: subthalamic_nucleus;Disease/Normal or Treatment [C]: normal;Gender: M;Disease type: Normal
GSM176066	GSE7307	vestibular_nuclei_superior	Tissue/Cell Line [C]: vestibular_nuclei_superior;Disease/Normal or Treatment [C]: normal;Gender: M;Disease type: Normal
GSM176067	GSE7307	hypothalamus	Tissue/Cell Line [C]: hypothalamus;Disease/Normal or Treatment [C]: normal;Gender: F;Disease type: Normal
GSM176068	GSE7307	midbrain	Tissue/Cell Line [C]: midbrain;Disease/Normal or Treatment [C]: normal;Gender: F;Disease type: Normal
GSM176069	GSE7307	temporal_lobe	Tissue/Cell Line [C]: temporal_lobe;Disease/Normal or Treatment [C]: normal;Gender: F;Disease type: Normal
GSM176070	GSE7307	thalamus	Tissue/Cell Line [C]: thalamus;Disease/Normal or Treatment [C]: normal;Gender: F;Disease type: Normal
GSM176071	GSE7307	ventral_tegmental_area	Tissue/Cell Line [C]: ventral_tegmental_area;Disease/Normal or Treatment [C]: normal;Gender: F;Disease type: Normal
GSM176072	GSE7307	nodose_nucleus	Tissue/Cell Line [C]: nodose_nucleus;Disease/Normal or Treatment [C]: normal;Gender: F;Disease type: Normal
GSM176073	GSE7307	occipital_lobe	Tissue/Cell Line [C]: occipital_lobe;Disease/Normal or Treatment [C]: normal;Gender: F;Disease type: Normal
GSM176074	GSE7307	spinal_cord	Tissue/Cell Line [C]: spinal_cord;Disease/Normal or Treatment [C]: normal;Gender: F;Disease type: Normal
GSM176075	GSE7307	dorsal_root_ganglia	Tissue/Cell Line [C]: dorsal_root_ganglia;Disease/Normal or Treatment [C]: normal;Gender: F;Disease type: Normal
GSM176076	GSE7307	trigeminal_ganglia	Tissue/Cell Line [C]: trigeminal_ganglia;Disease/Normal or Treatment [C]: normal;Gender: F;Disease type: Normal
GSM176077	GSE7307	vestibular_nuclei_superior	Tissue/Cell Line [C]: vestibular_nuclei_superior;Disease/Normal or Treatment [C]: normal;Gender: F;Disease type: Normal
GSM176078	GSE7307	vulva	Tissue/Cell Line [C]: vulva;Disease/Normal or Treatment [C]: normal;Gender: F;Disease type: Normal
GSM176079	GSE7307	vulva	Tissue/Cell Line [C]: vulva;Disease/Normal or Treatment [C]: normal;Gender: F;Disease type: Normal
GSM176080	GSE7307	vulva	Tissue/Cell Line [C]: vulva;Disease/Normal or Treatment [C]: normal;Gender: F;Disease type: Normal
GSM176081	GSE7307	vulva	Tissue/Cell Line [C]: vulva;Disease/Normal or Treatment [C]: normal;Gender: F;Disease type: Normal
GSM176102	GSE7307	myometrium	Tissue/Cell Line [C]: myometrium;Disease/Normal or Treatment [C]: normal;Gender: F;Disease type: Normal
GSM176104	GSE7307	myometrium	Tissue/Cell Line [C]: myometrium;Disease/Normal or Treatment [C]: normal;Gender: F;Disease type: Normal
GSM176106	GSE7307	myometrium	Tissue/Cell Line [C]: myometrium;Disease/Normal or Treatment [C]: normal;Gender: F;Disease type: Normal
GSM176108	GSE7307	myometrium	Tissue/Cell Line [C]: myometrium;Disease/Normal or Treatment [C]: normal;Gender: F;Disease type: Normal
GSM176110	GSE7307	myometrium	Tissue/Cell Line [C]: myometrium;Disease/Normal or Treatment [C]: normal;Gender: F;Disease type: Normal
GSM176112	GSE7307	aorta	Tissue/Cell Line [C]: aorta;Disease/Normal or Treatment [C]: normal;Gender: F;Disease type: Normal
GSM176113	GSE7307	testes	Tissue/Cell Line [C]: testes;Disease/Normal or Treatment [C]: normal;Gender: M;Disease type: Normal
GSM176114	GSE7307	tonsil	Tissue/Cell Line [C]: tonsil;Disease/Normal or Treatment [C]: normal;Gender: M;Disease type: Normal
GSM176115	GSE7307	coronary_artery	Tissue/Cell Line [C]: coronary_artery;Disease/Normal or Treatment [C]: normal;Gender: M;Disease type: Normal
GSM176116	GSE7307	hypothalamus	Tissue/Cell Line [C]: hypothalamus;Disease/Normal or Treatment [C]: normal;Gender: M;Disease type: Normal
GSM176117	GSE7307	skin	Tissue/Cell Line [C]: skin;Disease/Normal or Treatment [C]: normal;Gender: M;Disease type: Normal
GSM176118	GSE7307	adipose_tissue	Tissue/Cell Line [C]: adipose_tissue;Disease/Normal or Treatment [C]: normal;Gender: M;Disease type: Normal
GSM176119	GSE7307	adipose_tissue	Tissue/Cell Line [C]: adipose_tissue_subcutaneous;Disease/Normal or Treatment [C]: normal;Gender: M;Disease type: Normal
GSM176120	GSE7307	frontal_lobe	Tissue/Cell Line [C]: frontal_lobe;Disease/Normal or Treatment [C]: normal;Gender: M;Disease type: Normal
GSM176121	GSE7307	adipose_tissue	Tissue/Cell Line [C]: adipose_tissue_subcutaneous;Disease/Normal or Treatment [C]: normal;Gender: M;Disease type: Normal
GSM176122	GSE7307	mammary_gland	Tissue/Cell Line [C]: mammary_gland;Disease/Normal or Treatment [C]: normal;Gender: F;Disease type: Normal
GSM176123	GSE7307	colon_cecum	Tissue/Cell Line [C]: colon_cecum;Disease/Normal or Treatment [C]: normal;Gender: F;Disease type: Normal
GSM176124	GSE7307	subthalamic_nucleus	Tissue/Cell Line [C]: subthalamic_nucleus;Disease/Normal or Treatment [C]: normal;Gender: F;Disease type: Normal
GSM176125	GSE7307	substantia_nigra	Tissue/Cell Line [C]: substantia_nigra;Disease/Normal or Treatment [C]: normal;Gender: F;Disease type: Normal
GSM176126	GSE7307	myometrium	Tissue/Cell Line [C]: myometrium;Disease/Normal or Treatment [C]: normal;Gender: F;Disease type: Normal
GSM176127	GSE7307	endometrium	Tissue/Cell Line [C]: endometrium;Disease/Normal or Treatment [C]: normal;Gender: F;Disease type: Normal
GSM176128	GSE7307	myometrium	Tissue/Cell Line [C]: myometrium;Disease/Normal or Treatment [C]: normal;Gender: F;Disease type: Normal
GSM176129	GSE7307	vagina	Tissue/Cell Line [C]: vagina;Disease/Normal or Treatment [C]: normal;Gender: F;Disease type: Normal
GSM176130	GSE7307	cervix	Tissue/Cell Line [C]: cervix;Disease/Normal or Treatment [C]: normal;Gender: F;Disease type: Normal
GSM176131	GSE7307	ovary	Tissue/Cell Line [C]: ovary;Disease/Normal or Treatment [C]: normal;Gender: F;Disease type: Normal
GSM176132	GSE7307	endometrium	Tissue/Cell Line [C]: endometrium;Disease/Normal or Treatment [C]: normal;Gender: F;Disease type: Normal
GSM176133	GSE7307	myometrium	Tissue/Cell Line [C]: myometrium;Disease/Normal or Treatment [C]: normal;Gender: F;Disease type: Normal
GSM176134	GSE7307	vagina	Tissue/Cell Line [C]: vagina;Disease/Normal or Treatment [C]: normal;Gender: F;Disease type: Normal
GSM176135	GSE7307	cervix	Tissue/Cell Line [C]: cervix;Disease/Normal or Treatment [C]: normal;Gender: F;Disease type: Normal
GSM176136	GSE7307	ovary	Tissue/Cell Line [C]: ovary;Disease/Normal or Treatment [C]: normal;Gender: F;Disease type: Normal
GSM176137	GSE7307	endometrium	Tissue/Cell Line [C]: endometrium;Disease/Normal or Treatment [C]: normal;Gender: F;Disease type: Normal
GSM176138	GSE7307	myometrium	Tissue/Cell Line [C]: myometrium;Disease/Normal or Treatment [C]: normal;Gender: F;Disease type: Normal
GSM176139	GSE7307	vagina	Tissue/Cell Line [C]: vagina;Disease/Normal or Treatment [C]: normal;Gender: F;Disease type: Normal
GSM176140	GSE7307	cervix	Tissue/Cell Line [C]: cervix;Disease/Normal or Treatment [C]: normal;Gender: F;Disease type: Normal
GSM176141	GSE7307	endometrium	Tissue/Cell Line [C]: endometrium;Disease/Normal or Treatment [C]: normal;Gender: F;Disease type: Normal
GSM176142	GSE7307	endometrium	Tissue/Cell Line [C]: endometrium;Disease/Normal or Treatment [C]: normal;Gender: F;Disease type: Normal
GSM176143	GSE7307	myometrium	Tissue/Cell Line [C]: myometrium;Disease/Normal or Treatment [C]: normal;Gender: F;Disease type: Normal
GSM176144	GSE7307	myometrium	Tissue/Cell Line [C]: myometrium;Disease/Normal or Treatment [C]: normal;Gender: F;Disease type: Normal
GSM176145	GSE7307	myometrium	Tissue/Cell Line [C]: myometrium;Disease/Normal or Treatment [C]: normal;Gender: F;Disease type: Normal
GSM176146	GSE7307	myometrium	Tissue/Cell Line [C]: myometrium;Disease/Normal or Treatment [C]: normal;Gender: F;Disease type: Normal
GSM176147	GSE7307	amygdala	Tissue/Cell Line [C]: amygdala;Disease/Normal or Treatment [C]: normal;Gender: F;Disease type: Normal
GSM176148	GSE7307	amygdala	Tissue/Cell Line [C]: amygdala;Disease/Normal or Treatment [C]: normal;Gender: F;Disease type: Normal
GSM176149	GSE7307	amygdala	Tissue/Cell Line [C]: amygdala;Disease/Normal or Treatment [C]: normal;Gender: F;Disease type: Normal
GSM176150	GSE7307	putamen	Tissue/Cell Line [C]: putamen;Disease/Normal or Treatment [C]: normal;Gender: F;Disease type: Normal
GSM176151	GSE7307	putamen	Tissue/Cell Line [C]: putamen;Disease/Normal or Treatment [C]: normal;Gender: F;Disease type: Normal
GSM176152	GSE7307	putamen	Tissue/Cell Line [C]: putamen;Disease/Normal or Treatment [C]: normal;Gender: F;Disease type: Normal
GSM176153	GSE7307	accumbens	Tissue/Cell Line [C]: accumbens;Disease/Normal or Treatment [C]: normal;Gender: F;Disease type: Normal
GSM176154	GSE7307	accumbens	Tissue/Cell Line [C]: accumbens;Disease/Normal or Treatment [C]: normal;Gender: F;Disease type: Normal
GSM176155	GSE7307	accumbens	Tissue/Cell Line [C]: accumbens;Disease/Normal or Treatment [C]: normal;Gender: F;Disease type: Normal
GSM176156	GSE7307	accumbens	Tissue/Cell Line [C]: accumbens;Disease/Normal or Treatment [C]: normal;Gender: F;Disease type: Normal
GSM176157	GSE7307	cerebellum	Tissue/Cell Line [C]: cerebellum;Disease/Normal or Treatment [C]: normal;Gender: F;Disease type: Normal
GSM176158	GSE7307	cerebellum	Tissue/Cell Line [C]: cerebellum;Disease/Normal or Treatment [C]: normal;Gender: F;Disease type: Normal
GSM176159	GSE7307	cerebellum	Tissue/Cell Line [C]: cerebellum;Disease/Normal or Treatment [C]: normal;Gender: F;Disease type: Normal
GSM176160	GSE7307	cerebellum	Tissue/Cell Line [C]: cerebellum;Disease/Normal or Treatment [C]: normal;Gender: F;Disease type: Normal
GSM176161	GSE7307	cortex	Tissue/Cell Line [C]: cerebral_cortex;Disease/Normal or Treatment [C]: normal;Gender: F;Disease type: Normal
GSM176162	GSE7307	cortex	Tissue/Cell Line [C]: cerebral_cortex;Disease/Normal or Treatment [C]: normal;Gender: F;Disease type: Normal
GSM176163	GSE7307	cortex	Tissue/Cell Line [C]: cerebral_cortex;Disease/Normal or Treatment [C]: normal;Gender: F;Disease type: Normal
GSM176164	GSE7307	cortex	Tissue/Cell Line [C]: cerebral_cortex;Disease/Normal or Treatment [C]: normal;Gender: F;Disease type: Normal
GSM176165	GSE7307	corpus_callosum	Tissue/Cell Line [C]: corpus_callosum;Disease/Normal or Treatment [C]: normal;Gender: F;Disease type: Normal
GSM176166	GSE7307	corpus_callosum	Tissue/Cell Line [C]: corpus_callosum;Disease/Normal or Treatment [C]: normal;Gender: F;Disease type: Normal
GSM176167	GSE7307	corpus_callosum	Tissue/Cell Line [C]: corpus_callosum;Disease/Normal or Treatment [C]: normal;Gender: F;Disease type: Normal
GSM176168	GSE7307	corpus_callosum	Tissue/Cell Line [C]: corpus_callosum;Disease/Normal or Treatment [C]: normal;Gender: F;Disease type: Normal
GSM176169	GSE7307	putamen	Tissue/Cell Line [C]: putamen;Disease/Normal or Treatment [C]: normal;Gender: F;Disease type: Normal
GSM176170	GSE7307	frontal_lobe	Tissue/Cell Line [C]: frontal_lobe;Disease/Normal or Treatment [C]: normal;Gender: F;Disease type: Normal
GSM176171	GSE7307	frontal_lobe	Tissue/Cell Line [C]: frontal_lobe;Disease/Normal or Treatment [C]: normal;Gender: F;Disease type: Normal
GSM176172	GSE7307	frontal_lobe	Tissue/Cell Line [C]: frontal_lobe;Disease/Normal or Treatment [C]: normal;Gender: F;Disease type: Normal
GSM176173	GSE7307	frontal_lobe	Tissue/Cell Line [C]: frontal_lobe;Disease/Normal or Treatment [C]: normal;Gender: F;Disease type: Normal
GSM176174	GSE7307	hippocampus	Tissue/Cell Line [C]: hippocampus;Disease/Normal or Treatment [C]: normal;Gender: F;Disease type: Normal
GSM176175	GSE7307	hippocampus	Tissue/Cell Line [C]: hippocampus;Disease/Normal or Treatment [C]: normal;Gender: F;Disease type: Normal
GSM176176	GSE7307	hippocampus	Tissue/Cell Line [C]: hippocampus;Disease/Normal or Treatment [C]: normal;Gender: F;Disease type: Normal
GSM176177	GSE7307	hippocampus	Tissue/Cell Line [C]: hippocampus;Disease/Normal or Treatment [C]: normal;Gender: F;Disease type: Normal
GSM176178	GSE7307	parietal_lobe	Tissue/Cell Line [C]: parietal_lobe;Disease/Normal or Treatment [C]: normal;Gender: F;Disease type: Normal
GSM176179	GSE7307	parietal_lobe	Tissue/Cell Line [C]: parietal_lobe;Disease/Normal or Treatment [C]: normal;Gender: F;Disease type: Normal
GSM176180	GSE7307	parietal_lobe	Tissue/Cell Line [C]: parietal_lobe;Disease/Normal or Treatment [C]: normal;Gender: F;Disease type: Normal
GSM176181	GSE7307	parietal_lobe	Tissue/Cell Line [C]: parietal_lobe;Disease/Normal or Treatment [C]: normal;Gender: F;Disease type: Normal
GSM176182	GSE7307	medulla	Tissue/Cell Line [C]: medulla;Disease/Normal or Treatment [C]: normal;Gender: F;Disease type: Normal
GSM176183	GSE7307	medulla	Tissue/Cell Line [C]: medulla;Disease/Normal or Treatment [C]: normal;Gender: F;Disease type: Normal
GSM176184	GSE7307	medulla	Tissue/Cell Line [C]: medulla;Disease/Normal or Treatment [C]: normal;Gender: F;Disease type: Normal
GSM176185	GSE7307	medulla	Tissue/Cell Line [C]: medulla;Disease/Normal or Treatment [C]: normal;Gender: F;Disease type: Normal
GSM176186	GSE7307	nodose_nucleus	Tissue/Cell Line [C]: nodose_nucleus;Disease/Normal or Treatment [C]: normal;Gender: F;Disease type: Normal
GSM176205	GSE7307	nodose_nucleus	Tissue/Cell Line [C]: nodose_nucleus;Disease/Normal or Treatment [C]: normal;Gender: F;Disease type: Normal
GSM176206	GSE7307	occipital_lobe	Tissue/Cell Line [C]: occipital_lobe;Disease/Normal or Treatment [C]: normal;Gender: F;Disease type: Normal
GSM176207	GSE7307	occipital_lobe	Tissue/Cell Line [C]: occipital_lobe;Disease/Normal or Treatment [C]: normal;Gender: F;Disease type: Normal
GSM176208	GSE7307	spinal_cord	Tissue/Cell Line [C]: spinal_cord;Disease/Normal or Treatment [C]: normal;Gender: F;Disease type: Normal
GSM176209	GSE7307	spinal_cord	Tissue/Cell Line [C]: spinal_cord;Disease/Normal or Treatment [C]: normal;Gender: F;Disease type: Normal
GSM176210	GSE7307	subthalamic_nucleus	Tissue/Cell Line [C]: subthalamic_nucleus;Disease/Normal or Treatment [C]: normal;Gender: F;Disease type: Normal
GSM176211	GSE7307	subthalamic_nucleus	Tissue/Cell Line [C]: subthalamic_nucleus;Disease/Normal or Treatment [C]: normal;Gender: F;Disease type: Normal
GSM176212	GSE7307	substantia_nigra	Tissue/Cell Line [C]: substantia_nigra;Disease/Normal or Treatment [C]: normal;Gender: F;Disease type: Normal
GSM176213	GSE7307	substantia_nigra	Tissue/Cell Line [C]: substantia_nigra;Disease/Normal or Treatment [C]: normal;Gender: F;Disease type: Normal
GSM176214	GSE7307	temporal_lobe	Tissue/Cell Line [C]: temporal_lobe;Disease/Normal or Treatment [C]: normal;Gender: F;Disease type: Normal
GSM176215	GSE7307	temporal_lobe	Tissue/Cell Line [C]: temporal_lobe;Disease/Normal or Treatment [C]: normal;Gender: F;Disease type: Normal
GSM176216	GSE7307	thalamus	Tissue/Cell Line [C]: thalamus;Disease/Normal or Treatment [C]: normal;Gender: F;Disease type: Normal
GSM176217	GSE7307	thalamus	Tissue/Cell Line [C]: thalamus;Disease/Normal or Treatment [C]: normal;Gender: F;Disease type: Normal
GSM176218	GSE7307	dorsal_root_ganglia	Tissue/Cell Line [C]: dorsal_root_ganglia;Disease/Normal or Treatment [C]: normal;Gender: F;Disease type: Normal
GSM176219	GSE7307	dorsal_root_ganglia	Tissue/Cell Line [C]: dorsal_root_ganglia;Disease/Normal or Treatment [C]: normal;Gender: F;Disease type: Normal
GSM176220	GSE7307	trigeminal_ganglia	Tissue/Cell Line [C]: trigeminal_ganglia;Disease/Normal or Treatment [C]: normal;Gender: F;Disease type: Normal
GSM176221	GSE7307	trigeminal_ganglia	Tissue/Cell Line [C]: trigeminal_ganglia;Disease/Normal or Treatment [C]: normal;Gender: F;Disease type: Normal
GSM176222	GSE7307	ventral_tegmental_area	Tissue/Cell Line [C]: ventral_tegmental_area;Disease/Normal or Treatment [C]: normal;Gender: F;Disease type: Normal
GSM176223	GSE7307	ventral_tegmental_area	Tissue/Cell Line [C]: ventral_tegmental_area;Disease/Normal or Treatment [C]: normal;Gender: F;Disease type: Normal
GSM176224	GSE7307	vestibular_nuclei_superior	Tissue/Cell Line [C]: vestibular_nuclei_superior;Disease/Normal or Treatment [C]: normal;Gender: F;Disease type: Normal
GSM176225	GSE7307	vestibular_nuclei_superior	Tissue/Cell Line [C]: vestibular_nuclei_superior;Disease/Normal or Treatment [C]: normal;Gender: F;Disease type: Normal
GSM176226	GSE7307	hypothalamus	Tissue/Cell Line [C]: hypothalamus;Disease/Normal or Treatment [C]: normal;Gender: F;Disease type: Normal
GSM176228	GSE7307	myometrium	Tissue/Cell Line [C]: myometrium;Disease/Normal or Treatment [C]: normal;Gender: F;Disease type: Normal
GSM176230	GSE7307	myometrium	Tissue/Cell Line [C]: myometrium;Disease/Normal or Treatment [C]: normal;Gender: F;Disease type: Normal
GSM176231	GSE7307	mammary_gland	Tissue/Cell Line [C]: mammary_gland;Disease/Normal or Treatment [C]: normal;Gender: F;Disease type: Normal
GSM176232	GSE7307	mammary_gland	Tissue/Cell Line [C]: mammary_gland;Disease/Normal or Treatment [C]: normal;Gender: F;Disease type: Normal
GSM176233	GSE7307	hypothalamus	Tissue/Cell Line [C]: hypothalamus;Disease/Normal or Treatment [C]: normal;Gender: F;Disease type: Normal
GSM176237	GSE7307	ovary	Tissue/Cell Line [C]: ovary;Disease/Normal or Treatment [C]: normal;Gender: F;Disease type: Normal
GSM176239	GSE7307	fallopian_tube	Tissue/Cell Line [C]: fallopian tube;Disease/Normal or Treatment [C]: normal;Gender: F;Disease type: Normal
GSM176243	GSE7307	myometrium	Tissue/Cell Line [C]: myometrium;Disease/Normal or Treatment [C]: normal;Gender: F;Disease type: Normal
GSM176245	GSE7307	myometrium	Tissue/Cell Line [C]: myometrium;Disease/Normal or Treatment [C]: normal;Gender: F;Disease type: Normal
GSM176247	GSE7307	myometrium	Tissue/Cell Line [C]: myometrium;Disease/Normal or Treatment [C]: normal;Gender: F;Disease type: Normal
GSM176249	GSE7307	myometrium	Tissue/Cell Line [C]: myometrium;Disease/Normal or Treatment [C]: normal;Gender: F;Disease type: Normal
GSM176251	GSE7307	myometrium	Tissue/Cell Line [C]: myometrium;Disease/Normal or Treatment [C]: normal;Gender: F;Disease type: Normal
GSM176253	GSE7307	myometrium	Tissue/Cell Line [C]: myometrium;Disease/Normal or Treatment [C]: normal;Gender: F;Disease type: Normal
GSM176254	GSE7307	myometrium	Tissue/Cell Line [C]: myometrium;Disease/Normal or Treatment [C]: normal;Gender: F;Disease type: Normal
GSM176256	GSE7307	myometrium	Tissue/Cell Line [C]: myometrium;Disease/Normal or Treatment [C]: normal;Gender: F;Disease type: Normal
GSM176258	GSE7307	myometrium	Tissue/Cell Line [C]: myometrium;Disease/Normal or Treatment [C]: normal;Gender: F;Disease type: Normal
GSM176260	GSE7307	myometrium	Tissue/Cell Line [C]: myometrium;Disease/Normal or Treatment [C]: normal;Gender: F;Disease type: Normal
GSM176262	GSE7307	thymus	Tissue/Cell Line [C]: thymus_gland;Disease/Normal or Treatment [C]: normal;Gender: F;Disease type: Normal
GSM176263	GSE7307	aorta	Tissue/Cell Line [C]: aorta;Disease/Normal or Treatment [C]: normal;Gender: M;Disease type: Normal
GSM176264	GSE7307	aorta	Tissue/Cell Line [C]: aorta;Disease/Normal or Treatment [C]: normal;Gender: F;Disease type: Normal
GSM176265	GSE7307	jejunal_tissue	Tissue/Cell Line [C]: small_intestine_jejunum;Disease/Normal or Treatment [C]: normal;Gender: M;Disease type: Normal
GSM176266	GSE7307	jejunal_tissue	Tissue/Cell Line [C]: small_intestine_jejunum;Disease/Normal or Treatment [C]: normal;Gender: F;Disease type: Normal
GSM176267	GSE7307	skin	Tissue/Cell Line [C]: skin;Disease/Normal or Treatment [C]: normal;Gender: F;Disease type: Normal
GSM176268	GSE7307	synovium	Tissue/Cell Line [C]: joint_tissue_synovium;Disease/Normal or Treatment [C]: normal;Gender: M;Disease type: Normal
GSM176269	GSE7307	synovium	Tissue/Cell Line [C]: joint_tissue_synovium;Disease/Normal or Treatment [C]: normal;Gender: F;Disease type: Normal
GSM176270	GSE7307	penis	Tissue/Cell Line [C]: penis;Disease/Normal or Treatment [C]: normal;Gender: M;Disease type: Normal
GSM176271	GSE7307	penis	Tissue/Cell Line [C]: penis;Disease/Normal or Treatment [C]: normal;Gender: M;Disease type: Normal
GSM176272	GSE7307	penis	Tissue/Cell Line [C]: penis;Disease/Normal or Treatment [C]: normal;Gender: M;Disease type: Normal
GSM176273	GSE7307	penis	Tissue/Cell Line [C]: penis;Disease/Normal or Treatment [C]: normal;Gender: M;Disease type: Normal
GSM176274	GSE7307	penis	Tissue/Cell Line [C]: penis;Disease/Normal or Treatment [C]: normal;Gender: M;Disease type: Normal
GSM176275	GSE7307	testes	Tissue/Cell Line [C]: testes;Disease/Normal or Treatment [C]: normal;Gender: M;Disease type: Normal
GSM176276	GSE7307	testes	Tissue/Cell Line [C]: testes;Disease/Normal or Treatment [C]: normal;Gender: M;Disease type: Normal
GSM176277	GSE7307	prostate	Tissue/Cell Line [C]: prostate_gland;Disease/Normal or Treatment [C]: normal;Gender: M;Disease type: Normal
GSM176278	GSE7307	prostate	Tissue/Cell Line [C]: prostate_gland;Disease/Normal or Treatment [C]: normal;Gender: M;Disease type: Normal
GSM176279	GSE7307	urethra	Tissue/Cell Line [C]: urethra;Disease/Normal or Treatment [C]: normal;Gender: M;Disease type: Normal
GSM176280	GSE7307	urethra	Tissue/Cell Line [C]: urethra;Disease/Normal or Treatment [C]: normal;Gender: M;Disease type: Normal
GSM176290	GSE7307	synovial_membrane	Tissue/Cell Line [C]: synovial membrane;Disease/Normal or Treatment [C]: normal;Gender:;Disease type: Normal
GSM176291	GSE7307	synovial_membrane	Tissue/Cell Line [C]: synovial membrane;Disease/Normal or Treatment [C]: normal;Gender:;Disease type: Normal
GSM176292	GSE7307	synovial_membrane	Tissue/Cell Line [C]: synovial membrane;Disease/Normal or Treatment [C]: normal;Gender:;Disease type: Normal
GSM176293	GSE7307	cortex	Tissue/Cell Line [C]: frontal_cortex;Disease/Normal or Treatment [C]: normal;Gender: M;Disease type: Normal
GSM176294	GSE7307	fallopian_tube	Tissue/Cell Line [C]: fallopian_tube;Disease/Normal or Treatment [C]: normal;Gender: F;Disease type: Normal
GSM176295	GSE7307	pituitary_gland	Tissue/Cell Line [C]: pituitary_gland;Disease/Normal or Treatment [C]: normal;Gender: F;Disease type: Normal
GSM176296	GSE7307	pituitary_gland	Tissue/Cell Line [C]: pituitary_gland;Disease/Normal or Treatment [C]: normal;Gender: F;Disease type: Normal
GSM176297	GSE7307	pituitary_gland	Tissue/Cell Line [C]: pituitary_gland;Disease/Normal or Treatment [C]: normal;Gender: F;Disease type: Normal
GSM176300	GSE7307	bone_marrow	Tissue/Cell Line [C]: bone_marrow;Disease/Normal or Treatment [C]: normal;Gender: F;Disease type: Normal
GSM176301	GSE7307	deltoid_muscle	Tissue/Cell Line [C]: deltoid muscle;Disease/Normal or Treatment [C]: normal;Gender:;Disease type: Normal
GSM176310	GSE7307	deltoid_muscle	Tissue/Cell Line [C]: deltoid muscle;Disease/Normal or Treatment [C]: normal;Gender:;Disease type: Normal
GSM176312	GSE7307	deltoid_muscle	Tissue/Cell Line [C]: deltoid muscle;Disease/Normal or Treatment [C]: normal;Gender:;Disease type: Normal
GSM176313	GSE7307	deltoid_muscle	Tissue/Cell Line [C]: deltoid muscle;Disease/Normal or Treatment [C]: normal;Gender:;Disease type: Normal
GSM176315	GSE7307	deltoid_muscle	Tissue/Cell Line [C]: deltoid muscle;Disease/Normal or Treatment [C]: normal;Gender:;Disease type: Normal
GSM176317	GSE7307	deltoid_muscle	Tissue/Cell Line [C]: deltoid muscle;Disease/Normal or Treatment [C]: normal;Gender:;Disease type: Normal
GSM176318	GSE7307	ovary	Tissue/Cell Line [C]: ovary;Disease/Normal or Treatment [C]: normal;Gender: F;Disease type: Normal
GSM176319	GSE7307	endometrium	Tissue/Cell Line [C]: endometrium;Disease/Normal or Treatment [C]: normal;Gender: F;Disease type: Normal
GSM176320	GSE7307	myometrium	Tissue/Cell Line [C]: myometrium;Disease/Normal or Treatment [C]: normal;Gender: F;Disease type: Normal
GSM176321	GSE7307	kidney_cortex	Tissue/Cell Line [C]: kidney_cortex;Disease/Normal or Treatment [C]: normal;Gender: M;Disease type: Normal
GSM176322	GSE7307	kidney_cortex	Tissue/Cell Line [C]: kidney_cortex;Disease/Normal or Treatment [C]: normal;Gender: M;Disease type: Normal
GSM176323	GSE7307	kidney_cortex	Tissue/Cell Line [C]: kidney_cortex;Disease/Normal or Treatment [C]: normal;Gender: F;Disease type: Normal
GSM176324	GSE7307	kidney_cortex	Tissue/Cell Line [C]: kidney_cortex;Disease/Normal or Treatment [C]: normal;Gender: M;Disease type: Normal
GSM176325	GSE7307	prostate	Tissue/Cell Line [C]: prostate_gland;Disease/Normal or Treatment [C]: normal;Gender: M;Disease type: Normal
GSM176326	GSE7307	prostate	Tissue/Cell Line [C]: prostate_gland;Disease/Normal or Treatment [C]: normal;Gender: M;Disease type: Normal
GSM176327	GSE7307	prostate	Tissue/Cell Line [C]: prostate_gland;Disease/Normal or Treatment [C]: normal;Gender: M;Disease type: Normal
GSM176328	GSE7307	spleen	Tissue/Cell Line [C]: spleen;Disease/Normal or Treatment [C]: normal;Gender: M;Disease type: Normal
GSM176329	GSE7307	spleen	Tissue/Cell Line [C]: spleen;Disease/Normal or Treatment [C]: normal;Gender: M;Disease type: Normal
GSM176330	GSE7307	spleen	Tissue/Cell Line [C]: spleen;Disease/Normal or Treatment [C]: normal;Gender: F;Disease type: Normal
GSM176331	GSE7307	spleen	Tissue/Cell Line [C]: spleen;Disease/Normal or Treatment [C]: normal;Gender: M;Disease type: Normal
GSM176332	GSE7307	liver	Tissue/Cell Line [C]: liver;Disease/Normal or Treatment [C]: normal;Gender: M;Disease type: Normal
GSM176333	GSE7307	liver	Tissue/Cell Line [C]: liver;Disease/Normal or Treatment [C]: normal;Gender: M;Disease type: Normal
GSM176334	GSE7307	liver	Tissue/Cell Line [C]: liver;Disease/Normal or Treatment [C]: normal;Gender: F;Disease type: Normal
GSM176335	GSE7307	liver	Tissue/Cell Line [C]: liver;Disease/Normal or Treatment [C]: normal;Gender: M;Disease type: Normal
GSM176336	GSE7307	stomach_fundus	Tissue/Cell Line [C]: stomach_fundus;Disease/Normal or Treatment [C]: normal;Gender: M;Disease type: Normal
GSM176337	GSE7307	stomach_fundus	Tissue/Cell Line [C]: stomach_fundus;Disease/Normal or Treatment [C]: normal;Gender: M;Disease type: Normal
GSM176338	GSE7307	stomach_fundus	Tissue/Cell Line [C]: stomach_fundus;Disease/Normal or Treatment [C]: normal;Gender: F;Disease type: Normal
GSM176339	GSE7307	stomach_fundus	Tissue/Cell Line [C]: stomach_fundus;Disease/Normal or Treatment [C]: normal;Gender: M;Disease type: Normal
GSM176340	GSE7307	stomach_pyloric	Tissue/Cell Line [C]: stomach_pyloric;Disease/Normal or Treatment [C]: normal;Gender: M;Disease type: Normal
GSM176341	GSE7307	stomach_pyloric	Tissue/Cell Line [C]: stomach_pyloric;Disease/Normal or Treatment [C]: normal;Gender: M;Disease type: Normal
GSM176342	GSE7307	stomach_pyloric	Tissue/Cell Line [C]: stomach_pyloric;Disease/Normal or Treatment [C]: normal;Gender: F;Disease type: Normal
GSM176343	GSE7307	stomach_pyloric	Tissue/Cell Line [C]: stomach_pyloric;Disease/Normal or Treatment [C]: normal;Gender: M;Disease type: Normal
GSM176344	GSE7307	cortex	Tissue/Cell Line [C]: cerebral_cortex;Disease/Normal or Treatment [C]: normal;Gender: M;Disease type: Normal
GSM176345	GSE7307	cortex	Tissue/Cell Line [C]: cerebral_cortex;Disease/Normal or Treatment [C]: normal;Gender: M;Disease type: Normal
GSM176346	GSE7307	cortex	Tissue/Cell Line [C]: cerebral_cortex;Disease/Normal or Treatment [C]: normal;Gender: F;Disease type: Normal
GSM176347	GSE7307	cortex	Tissue/Cell Line [C]: cerebral_cortex;Disease/Normal or Treatment [C]: normal;Gender: M;Disease type: Normal
GSM176348	GSE7307	nodose_nucleus	Tissue/Cell Line [C]: nodose_nucleus;Disease/Normal or Treatment [C]: normal;Gender: M;Disease type: Normal
GSM176349	GSE7307	nodose_nucleus	Tissue/Cell Line [C]: nodose_nucleus;Disease/Normal or Treatment [C]: normal;Gender: M;Disease type: Normal
GSM176350	GSE7307	nodose_nucleus	Tissue/Cell Line [C]: nodose_nucleus;Disease/Normal or Treatment [C]: normal;Gender: F;Disease type: Normal
GSM176351	GSE7307	nodose_nucleus	Tissue/Cell Line [C]: nodose_nucleus;Disease/Normal or Treatment [C]: normal;Gender: M;Disease type: Normal
GSM176352	GSE7307	occipital_lobe	Tissue/Cell Line [C]: occipital_lobe;Disease/Normal or Treatment [C]: normal;Gender: M;Disease type: Normal
GSM176353	GSE7307	occipital_lobe	Tissue/Cell Line [C]: occipital_lobe;Disease/Normal or Treatment [C]: normal;Gender: M;Disease type: Normal
GSM176354	GSE7307	occipital_lobe	Tissue/Cell Line [C]: occipital_lobe;Disease/Normal or Treatment [C]: normal;Gender: F;Disease type: Normal
GSM176355	GSE7307	occipital_lobe	Tissue/Cell Line [C]: occipital_lobe;Disease/Normal or Treatment [C]: normal;Gender: M;Disease type: Normal
GSM176357	GSE7307	accumbens	Tissue/Cell Line [C]: accumbens;Disease/Normal or Treatment [C]: normal;Gender:;Disease type: Normal
GSM176363	GSE7307	caudate	Tissue/Cell Line [C]: caudate;Disease/Normal or Treatment [C]: normal;Gender: M;Disease type: Normal
GSM176364	GSE7307	accumbens	Tissue/Cell Line [C]: accumbens;Disease/Normal or Treatment [C]: normal;Gender: M;Disease type: Normal
GSM176365	GSE7307	caudate	Tissue/Cell Line [C]: caudate;Disease/Normal or Treatment [C]: normal;Gender: M;Disease type: Normal
GSM176366	GSE7307	accumbens	Tissue/Cell Line [C]: accumbens;Disease/Normal or Treatment [C]: normal;Gender: M;Disease type: Normal
GSM176367	GSE7307	putamen	Tissue/Cell Line [C]: putamen;Disease/Normal or Treatment [C]: normal;Gender: M;Disease type: Normal
GSM176369	GSE7307	caudate	Tissue/Cell Line [C]: caudate;Disease/Normal or Treatment [C]: normal;Gender: M;Disease type: Normal
GSM176370	GSE7307	accumbens	Tissue/Cell Line [C]: accumbens;Disease/Normal or Treatment [C]: normal;Gender: M;Disease type: Normal
GSM176371	GSE7307	putamen	Tissue/Cell Line [C]: putamen;Disease/Normal or Treatment [C]: normal;Gender: M;Disease type: Normal
GSM176372	GSE7307	caudate	Tissue/Cell Line [C]: caudate;Disease/Normal or Treatment [C]: normal;Gender: M;Disease type: Normal
GSM176373	GSE7307	accumbens	Tissue/Cell Line [C]: accumbens;Disease/Normal or Treatment [C]: normal;Gender: M;Disease type: Normal
GSM176374	GSE7307	putamen	Tissue/Cell Line [C]: putamen;Disease/Normal or Treatment [C]: normal;Gender: M;Disease type: Normal
GSM176379	GSE7307	accumbens	Tissue/Cell Line [C]: accumbens;Disease/Normal or Treatment [C]: normal;Gender:;Disease type: Normal
GSM176380	GSE7307	putamen	Tissue/Cell Line [C]: putamen;Disease/Normal or Treatment [C]: normal;Gender:;Disease type: Normal
GSM176381	GSE7307	hypothalamus	Tissue/Cell Line [C]: hypothalamus;Disease/Normal or Treatment [C]: normal;Gender: M;Disease type: Normal
GSM176382	GSE7307	hypothalamus	Tissue/Cell Line [C]: hypothalamus;Disease/Normal or Treatment [C]: normal;Gender: M;Disease type: Normal
GSM176383	GSE7307	hypothalamus	Tissue/Cell Line [C]: hypothalamus;Disease/Normal or Treatment [C]: normal;Gender: F;Disease type: Normal
GSM176384	GSE7307	hypothalamus	Tissue/Cell Line [C]: hypothalamus;Disease/Normal or Treatment [C]: normal;Gender: M;Disease type: Normal
GSM176385	GSE7307	oral_mucosa	Tissue/Cell Line [C]: oral_mucosa;Disease/Normal or Treatment [C]: normal;Gender: M;Disease type: Normal
GSM176386	GSE7307	oral_mucosa	Tissue/Cell Line [C]: oral_mucosa;Disease/Normal or Treatment [C]: normal;Gender: M;Disease type: Normal
GSM176387	GSE7307	oral_mucosa	Tissue/Cell Line [C]: oral_mucosa;Disease/Normal or Treatment [C]: normal;Gender: F;Disease type: Normal
GSM176388	GSE7307	oral_mucosa	Tissue/Cell Line [C]: oral_mucosa;Disease/Normal or Treatment [C]: normal;Gender: M;Disease type: Normal
GSM176389	GSE7307	esophagus	Tissue/Cell Line [C]: esophagus;Disease/Normal or Treatment [C]: normal;Gender: M;Disease type: Normal
GSM176390	GSE7307	esophagus	Tissue/Cell Line [C]: esophagus;Disease/Normal or Treatment [C]: normal;Gender: M;Disease type: Normal
GSM176391	GSE7307	esophagus	Tissue/Cell Line [C]: esophagus;Disease/Normal or Treatment [C]: normal;Gender: F;Disease type: Normal
GSM176392	GSE7307	esophagus	Tissue/Cell Line [C]: esophagus;Disease/Normal or Treatment [C]: normal;Gender: M;Disease type: Normal
GSM176393	GSE7307	substantia_nigra_pars_compacta	Tissue/Cell Line [C]: substantia nigra_pars compacta;Disease/Normal or Treatment [C]: normal;Gender: M;Disease type: Normal
GSM176394	GSE7307	substantia_nigra_pars_compacta	Tissue/Cell Line [C]: substantia nigra_pars compacta;Disease/Normal or Treatment [C]: normal;Gender: M;Disease type: Normal
GSM176395	GSE7307	substantia_nigra_reticulata	Tissue/Cell Line [C]: substantia nigra_reticulata;Disease/Normal or Treatment [C]: normal;Gender: M;Disease type: Normal
GSM176397	GSE7307	substantia_nigra_pars_compacta	Tissue/Cell Line [C]: substantia nigra_pars compacta;Disease/Normal or Treatment [C]: normal;Gender: M;Disease type: Normal
GSM176398	GSE7307	substantia_nigra_reticulata	Tissue/Cell Line [C]: substantia nigra_reticulata;Disease/Normal or Treatment [C]: normal;Gender: M;Disease type: Normal
GSM176401	GSE7307	substantia_nigra_pars_compacta	Tissue/Cell Line [C]: substantia nigra_pars compacta;Disease/Normal or Treatment [C]: normal;Gender: F;Disease type: Normal
GSM176402	GSE7307	substantia_nigra_reticulata	Tissue/Cell Line [C]: substantia nigra_reticulata;Disease/Normal or Treatment [C]: normal;Gender: F;Disease type: Normal
GSM176403	GSE7307	substantia_nigra_pars_compacta	Tissue/Cell Line [C]: substantia nigra_pars compacta;Disease/Normal or Treatment [C]: normal;Gender: M;Disease type: Normal
GSM176404	GSE7307	substantia_nigra_reticulata	Tissue/Cell Line [C]: substantia nigra_reticulata;Disease/Normal or Treatment [C]: normal;Gender: M;Disease type: Normal
GSM176407	GSE7307	adrenal_gland_cortex	Tissue/Cell Line [C]: adrenal_gland_cortex;Disease/Normal or Treatment [C]: normal;Gender: M;Disease type: Normal
GSM176408	GSE7307	adrenal_gland_cortex	Tissue/Cell Line [C]: adrenal_gland_cortex;Disease/Normal or Treatment [C]: normal;Gender: M;Disease type: Normal
GSM176409	GSE7307	adrenal_gland_cortex	Tissue/Cell Line [C]: adrenal_gland_cortex;Disease/Normal or Treatment [C]: normal;Gender: F;Disease type: Normal
GSM176410	GSE7307	adrenal_gland_cortex	Tissue/Cell Line [C]: adrenal_gland_cortex;Disease/Normal or Treatment [C]: normal;Gender: M;Disease type: Normal
GSM176411	GSE7307	pituitary_gland	Tissue/Cell Line [C]: pituitary_gland;Disease/Normal or Treatment [C]: normal;Gender: M;Disease type: Normal
GSM176412	GSE7307	pituitary_gland	Tissue/Cell Line [C]: pituitary_gland;Disease/Normal or Treatment [C]: normal;Gender: F;Disease type: Normal
GSM176413	GSE7307	pituitary_gland	Tissue/Cell Line [C]: pituitary_gland;Disease/Normal or Treatment [C]: normal;Gender: M;Disease type: Normal
GSM176414	GSE7307	salivary_gland	Tissue/Cell Line [C]: salivary_gland;Disease/Normal or Treatment [C]: normal;Gender: M;Disease type: Normal
GSM176415	GSE7307	salivary_gland	Tissue/Cell Line [C]: salivary_gland;Disease/Normal or Treatment [C]: normal;Gender: M;Disease type: Normal
GSM176416	GSE7307	salivary_gland	Tissue/Cell Line [C]: salivary_gland;Disease/Normal or Treatment [C]: normal;Gender: F;Disease type: Normal
GSM176417	GSE7307	salivary_gland	Tissue/Cell Line [C]: salivary_gland;Disease/Normal or Treatment [C]: normal;Gender: M;Disease type: Normal
GSM176418	GSE7307	thyroid	Tissue/Cell Line [C]: thyroid_gland;Disease/Normal or Treatment [C]: normal;Gender: M;Disease type: Normal
GSM176419	GSE7307	thyroid	Tissue/Cell Line [C]: thyroid_gland;Disease/Normal or Treatment [C]: normal;Gender: M;Disease type: Normal
GSM176420	GSE7307	thyroid	Tissue/Cell Line [C]: thyroid_gland;Disease/Normal or Treatment [C]: normal;Gender: F;Disease type: Normal
GSM176421	GSE7307	thyroid	Tissue/Cell Line [C]: thyroid_gland;Disease/Normal or Treatment [C]: normal;Gender: M;Disease type: Normal
GSM176422	GSE7307	testes	Tissue/Cell Line [C]: testes;Disease/Normal or Treatment [C]: normal;Gender: M;Disease type: Normal
GSM176423	GSE7307	testes	Tissue/Cell Line [C]: testes;Disease/Normal or Treatment [C]: normal;Gender: M;Disease type: Normal
GSM176424	GSE7307	kidney_medulla	Tissue/Cell Line [C]: kidney_medulla;Disease/Normal or Treatment [C]: normal;Gender: M;Disease type: Normal
GSM176425	GSE7307	kidney_medulla	Tissue/Cell Line [C]: kidney_medulla;Disease/Normal or Treatment [C]: normal;Gender: M;Disease type: Normal
GSM176426	GSE7307	kidney_medulla	Tissue/Cell Line [C]: kidney_medulla;Disease/Normal or Treatment [C]: normal;Gender: F;Disease type: Normal
GSM176427	GSE7307	kidney_medulla	Tissue/Cell Line [C]: kidney_medulla;Disease/Normal or Treatment [C]: normal;Gender: M;Disease type: Normal
GSM176428	GSE7307	urethra	Tissue/Cell Line [C]: urethra;Disease/Normal or Treatment [C]: normal;Gender: M;Disease type: Normal
GSM176429	GSE7307	urethra	Tissue/Cell Line [C]: urethra;Disease/Normal or Treatment [C]: normal;Gender: M;Disease type: Normal
GSM176430	GSE7307	urethra	Tissue/Cell Line [C]: urethra;Disease/Normal or Treatment [C]: normal;Gender: M;Disease type: Normal
GSM176431	GSE7307	lymph_node	Tissue/Cell Line [C]: lymph_nodes;Disease/Normal or Treatment [C]: normal;Gender: M;Disease type: Normal
GSM176432	GSE7307	lymph_node	Tissue/Cell Line [C]: lymph_nodes;Disease/Normal or Treatment [C]: normal;Gender: M;Disease type: Normal
GSM176433	GSE7307	lymph_node	Tissue/Cell Line [C]: lymph_nodes;Disease/Normal or Treatment [C]: normal;Gender: F;Disease type: Normal
GSM176434	GSE7307	lymph_node	Tissue/Cell Line [C]: lymph_nodes;Disease/Normal or Treatment [C]: normal;Gender: M;Disease type: Normal
GSM176435	GSE7307	heart_atrium	Tissue/Cell Line [C]: heart_atrium;Disease/Normal or Treatment [C]: normal;Gender: M;Disease type: Normal
GSM178746	GSE7451	saliva	gender: female','age: 22','tissue: whole saliva','healthy control
GSM180372	GSE7451	saliva	gender: female','age: 26','tissue: whole saliva','healthy control'
GSM180373	GSE7451	saliva	gender: female','age: 36','tissue: whole saliva','healthy control
GSM180374	GSE7451	saliva	gender: female','age: 51','tissue: whole saliva','healthy control
GSM180375	GSE7451	saliva	gender: female','age: 36','tissue: whole saliva','healthy control
GSM180376	GSE7451	saliva	gender: female','age: 43','tissue: whole saliva','healthy control'
GSM180377	GSE7451	saliva	gender: female','age: 45','tissue: whole saliva','healthy control'
GSM180378	GSE7451	saliva	gender: female','age: 35','tissue: whole saliva','healthy control'
GSM180379	GSE7451	saliva	gender: female','age: 27','tissue: whole saliva','healthy control
GSM180380	GSE7451	saliva	gender: female','age: 51','tissue: whole saliva','healthy control'
GSM180991	GSE7476	bladder	Tissue extracted resecting a bladder area using scissors.;Immediately frozen and stored at -80¬∫C until processed.;Pool of 4 individual samples.
GSM180992	GSE7476	bladder	Tissue extracted resecting a bladder area using scissors.;Immediately frozen and store at -80¬∫C until processed.;Pool of 4 individual samples.
GSM180993	GSE7476	bladder	Tissue extracted resecting a bladder area using scissors.;Immediately frozen and stored at -80¬∫C until processed.;Pool of 4 individual samples.
GSM183234	GSE7553	skin	Group 1;Normal Skin
GSM183300	GSE7553	skin	Group 3;Normal Skin
GSM183301	GSE7553	skin	Group 3;Normal Skin
GSM183302	GSE7553	skin	Group 3;Normal Skin
GSM184354	GSE7621	substantia_nigra	Old Control;female
GSM184355	GSE7621	substantia_nigra	Old Control;male
GSM184356	GSE7621	substantia_nigra	Old Control;female
GSM184357	GSE7621	substantia_nigra	Old Control;female
GSM184358	GSE7621	substantia_nigra	Old Control;female
GSM184359	GSE7621	substantia_nigra	Old Control;female
GSM184360	GSE7621	substantia_nigra	Old Control;male
GSM184361	GSE7621	substantia_nigra	Old Control;male
GSM184362	GSE7621	substantia_nigra	Old Control;male
GSM187156	GSE7696	brain	patient: 1076; age: NA; gender: NA; treatment: NA; survival status: NA; survival time in months: NA
GSM187170	GSE7696	brain	patient: 148; age: NA; gender: NA; treatment: NA; survival status: NA; survival time in months: NA
GSM187173	GSE7696	brain	patient: 1553; age: NA; gender: NA; treatment: NA; survival status: NA; survival time in months: NA
GSM187180	GSE7696	brain	patient: 1780; age: NA; gender: NA; treatment: NA; survival status: NA; survival time in months: NA
GSM187584	GSE7753	pbmc	NA
GSM187585	GSE7753	pbmc	NA
GSM187586	GSE7753	pbmc	NA
GSM187587	GSE7753	pbmc	NA
GSM187588	GSE7753	pbmc	NA
GSM187589	GSE7753	pbmc	NA
GSM187590	GSE7753	pbmc	NA
GSM187591	GSE7753	pbmc	NA
GSM187592	GSE7753	pbmc	NA
GSM187593	GSE7753	pbmc	NA
GSM187594	GSE7753	pbmc	NA
GSM187595	GSE7753	pbmc	NA
GSM187596	GSE7753	pbmc	NA
GSM187597	GSE7753	pbmc	NA
GSM187598	GSE7753	pbmc	NA
GSM187599	GSE7753	pbmc	NA
GSM187600	GSE7753	pbmc	NA
GSM187601	GSE7753	pbmc	NA
GSM187602	GSE7753	pbmc	NA
GSM187603	GSE7753	pbmc	NA
GSM187604	GSE7753	pbmc	NA
GSM187605	GSE7753	pbmc	NA
GSM187606	GSE7753	pbmc	NA
GSM187607	GSE7753	pbmc	NA
GSM187608	GSE7753	pbmc	NA
GSM187609	GSE7753	pbmc	NA
GSM187610	GSE7753	pbmc	NA
GSM187611	GSE7753	pbmc	NA
GSM187612	GSE7753	pbmc	NA
GSM187613	GSE7753	pbmc	NA
GSM189455	GSE7808	epididimus_corpus	Normal epididimus, 26 years-old, corpus segment
GSM189456	GSE7808	epididimus_tail	Normal epididimus,26 years-old, tail segment
GSM189457	GSE7808	epididimus_head	Normal epididimus,26 years-old, head segment
GSM189458	GSE7808	epididimus_corpus	Normal epididimus,47 years-old, corpus segment
GSM189459	GSE7808	epididimus_tail	Normal epididimus,47 years-old, tail segment
GSM189460	GSE7808	epididimus_head	Normal epididimus,47 years-old, head segment
GSM189461	GSE7808	epididimus_corpus	Normal epididimus,50 years-old, corpus segment
GSM189462	GSE7808	epididimus_tail	Normal epididimus,50 years-old, tail segment
GSM189463	GSE7808	epididimus_head	Normal epididimus,50 years-old, head segment
GSM189751	GSE7821	intestinal_mucosa	other: pair 01;gender: female;age: 30;genotype/variation: monozygotic twin
GSM189752	GSE7821	intestinal_mucosa	other: pair 01;gender: female;age: 30;genotype/variation: monozygotic twin
GSM189753	GSE7821	intestinal_mucosa	other: pair 02;gender: female;age: 39;genotype/variation: monozygotic twin
GSM189754	GSE7821	intestinal_mucosa	other: pair 02;gender: female;age: 39;genotype/variation: monozygotic twin
GSM189755	GSE7821	intestinal_mucosa	other: pair 03;gender: female;age: 21;genotype/variation: monozygotic twin
GSM189756	GSE7821	intestinal_mucosa	other: pair 03;gender: female;age: 21;genotype/variation: monozygotic twin
GSM189757	GSE7821	intestinal_mucosa	other: pair 04;gender: female;age: 23;genotype/variation: monozygotic twin
GSM189758	GSE7821	intestinal_mucosa	other: pair 04;gender: female;age: 23;genotype/variation: monozygotic twin
GSM189759	GSE7821	intestinal_mucosa	other: pair 05;gender: female;age: 53;genotype/variation: monozygotic twin
GSM189760	GSE7821	intestinal_mucosa	other: pair 05;gender: female;age: 53;genotype/variation: monozygotic twin
GSM189761	GSE7821	intestinal_mucosa	other: pair 06;gender: male;age: 20;genotype/variation: monozygotic twin
GSM189762	GSE7821	intestinal_mucosa	other: pair 06;gender: male;age: 20;genotype/variation: monozygotic twin
GSM189763	GSE7821	intestinal_mucosa	other: pair 07;gender: female;age: 30;genotype/variation: monozygotic twin
GSM189764	GSE7821	intestinal_mucosa	other: pair 07;gender: female;age: 30;genotype/variation: monozygotic twin
GSM189765	GSE7821	intestinal_mucosa	other: pair 08;gender: female;age: 37;genotype/variation: monozygotic twin
GSM189766	GSE7821	intestinal_mucosa	other: pair 08;gender: female;age: 37;genotype/variation: monozygotic twin
GSM189767	GSE7821	intestinal_mucosa	other: pair 11;gender: male;age: 34;genotype/variation: monozygotic twin
GSM189768	GSE7821	intestinal_mucosa	other: pair 11;gender: male;age: 34;genotype/variation: monozygotic twin
GSM189769	GSE7821	intestinal_mucosa	other: pair 12;gender: male;age: 47;genotype/variation: monozygotic twin
GSM189770	GSE7821	intestinal_mucosa	other: pair 12;gender: male;age: 47;genotype/variation: monozygotic twin
GSM189771	GSE7821	intestinal_mucosa	other: pair 20;gender: female;age: 38;genotype/variation: dizygotic twin
GSM189772	GSE7821	intestinal_mucosa	other: pair 20;gender: female;age: 38;genotype/variation: dizygotic twin
GSM189773	GSE7821	intestinal_mucosa	other: pair 21;gender: female;age: 24;genotype/variation: dizygotic twin
GSM189774	GSE7821	intestinal_mucosa	other: pair 21;gender: female;age: 24;genotype/variation: dizygotic twin
GSM189775	GSE7821	intestinal_mucosa	other: pair 22;gender: male;age: 43;genotype/variation: dizygotic twin
GSM189776	GSE7821	intestinal_mucosa	other: pair 22;gender: male;age: 43;genotype/variation: dizygotic twin
GSM189777	GSE7821	intestinal_mucosa	other: pair 23;gender: male;age: 20;genotype/variation: dizygotic twin
GSM189778	GSE7821	intestinal_mucosa	other: pair 23;gender: male;age: 20;genotype/variation: dizygotic twin
GSM189779	GSE7821	intestinal_mucosa	other: pair 24;gender: female;age: 36;genotype/variation: dizygotic twin
GSM189780	GSE7821	intestinal_mucosa	other: pair 24;gender: female;age: 36;genotype/variation: dizygotic twin
GSM189781	GSE7821	intestinal_mucosa	other: pair 25;gender: female;age: 22;genotype/variation: dizygotic twin
GSM189782	GSE7821	intestinal_mucosa	other: pair 25;gender: female;age: 22;genotype/variation: dizygotic twin
GSM189783	GSE7821	intestinal_mucosa	other: pair 26;gender: female;age: 30;genotype/variation: dizygotic twin
GSM189784	GSE7821	intestinal_mucosa	other: pair 26;gender: female;age: 30;genotype/variation: dizygotic twin
GSM189785	GSE7821	intestinal_mucosa	other: pair 27;gender: female;age: 43;genotype/variation: dizygotic twin
GSM189786	GSE7821	intestinal_mucosa	other: pair 27;gender: female;age: 43;genotype/variation: dizygotic twin
GSM189787	GSE7821	intestinal_mucosa	other: pair 28;gender: male;age: 33;genotype/variation: dizygotic twin
GSM189788	GSE7821	intestinal_mucosa	other: pair 28;gender: male;age: 33;genotype/variation: dizygotic twin
GSM189789	GSE7821	intestinal_mucosa	other: pair 29;gender: female;age: 32;genotype/variation: dizygotic twin
GSM189790	GSE7821	intestinal_mucosa	other: pair 29;gender: female;age: 32;genotype/variation: dizygotic twin
GSM190149	GSE7832	airway_epithelial_cells	age: 49;sex: M;ethnic group: white;smoking status: non-smoker
GSM190150	GSE7832	airway_epithelial_cells	Age: 34;Sex: M;Ethnic group: black;Smoking status: non-smoker
GSM190151	GSE7832;GSE8545	airway_epithelial_cells	Age: 44;Sex: M;Ethnic group: black;Smoking status: non-smoker
GSM190152	GSE7832	airway_epithelial_cells	Age: 45;Sex: M;Ethnic group: white;Smoking status: non-smoker
GSM190153	GSE7832;GSE8545	airway_epithelial_cells	Age: 45;Sex: F;Ethnic group: hispanic;Smoking status: non-smoker
GSM190154	GSE7832	airway_epithelial_cells	Age: 29;Sex: F;Ethnic group: black/hispanic;Smoking status: non-smoker
GSM190155	GSE7832	airway_epithelial_cells	Age: 42;Sex: M;Ethnic group: black;Smoking status: non-smoker
GSM190156	GSE7832	airway_epithelial_cells	Age: 56;Sex: M;Ethnic group: white;Smoking status: non-smoker
GSM190400	GSE7846	endometrial_endothelial_cell	NA
GSM190401	GSE7846	endometrial_endothelial_cell	NA
GSM190402	GSE7846	endometrial_endothelial_cell	NA
GSM190403	GSE7846	endometrial_endothelial_cell	NA
GSM190404	GSE7846	endometrial_endothelial_cell	NA
GSM190876	GSE7869	renal_cortical_tissue	Non-cancerous renal cortical tissue from nephrectomized kidney with isolated renal cell carcinoma of patient 1
GSM190877	GSE7869	renal_cortical_tissue	Non-cancerous renal cortical tissue from nephrectomized kidney with isolated renal cell carcinoma of patient 2
GSM190878	GSE7869	renal_cortical_tissue	Non-cancerous renal cortical tissue from nephrectomized kidney with isolated renal cell carcinoma of patient 3
GSM198783	GSE8050	kidney	birthday 30/11/1930; male; normal tissue mass 12.4g
GSM198785	GSE8050	kidney	birthday 29/04/1931; female
GSM198875	GSE8056	skin	Normal human skin, pooled replicate #2 of normal (no thermal injury) skin control
GSM198876	GSE8056	skin	Normal human skin, pooled replicate #3 of normal (no thermal injury) skin control
GSM198877	GSE8056	skin	Normal human skin, pooled replicate #1 of normal (no thermal injury) skin control
GSM201230	GSE8121	blood	NA
GSM201231	GSE8121	blood	NA
GSM201232	GSE8121	blood	NA
GSM201233	GSE8121	blood	NA
GSM201234	GSE8121	blood	NA
GSM201235	GSE8121	blood	NA
GSM201236	GSE8121	blood	NA
GSM201237	GSE8121	blood	NA
GSM201238	GSE8121	blood	NA
GSM201239	GSE8121	blood	NA
GSM201240	GSE8121	blood	NA
GSM201241	GSE8121	blood	NA
GSM201242	GSE8121	blood	NA
GSM201243	GSE8121	blood	NA
GSM201244	GSE8121	blood	NA
GSM215051	GSE8671	colonic_mucosa	Tissue: normal;Location: descending colon;Size: 0.2 cm (x3);Patient ID: GL;CEL Filename: 131004_GL_nm.CEL, where \nm\\ is for normal mucosa (colorectal) and \\"po\\" is for polyp (colorectal)\\"\""
GSM215052	GSE8671	sigmoid_colon_mucosa	Tissue: normal;Location: sigmoid colon;Size: 0.2 cm (x3);Patient ID: PR;CEL Filename: 230305_PR_nm_II (vi_nm_3_II).CEL, where \nm\\ is for normal mucosa (colorectal) and \\"po\\" is for polyp (colorectal)\\"\""
GSM215053	GSE8671	sigmoid_colon_mucosa	Tissue: normal;Location: sigmoid colon;Size: 0.2 cm (x3);Patient ID: PC;CEL Filename: 151004_PC_nm.CEL, where \nm\\ is for normal mucosa (colorectal) and \\"po\\" is for polyp (colorectal)\\"\""
GSM215054	GSE8671	sigmoid_colon_mucosa	Tissue: normal;Location: sigmoid colon;Size: 0.2 cm (x3);Patient ID: GL;CEL Filename: 151004_GL_2_nm.CEL, where \nm\\ is for normal mucosa (colorectal) and \\"po\\" is for polyp (colorectal)\\"\""
GSM215055	GSE8671	sigmoid_colon_mucosa	Tissue: normal;Location: sigmoid colon;Size: 0.2 cm (x3);Patient ID: FP;CEL Filename: 121104_FP_nm.CEL, where \nm\\ is for normal mucosa (colorectal) and \\"po\\" is for polyp (colorectal)\\"\""
GSM215056	GSE8671	sigmoid_colon_mucosa	Tissue: normal;Location: sigmoid colon;Size: 0.2 cm (x3);Patient ID: FP;CEL Filename: 121104_FP_2_nm.CEL, where \nm\\ is for normal mucosa (colorectal) and \\"po\\" is for polyp (colorectal)\\"\""
GSM215058	GSE8671	rectum_mucosa	Tissue: normal;Location: rectum;Size: 0.2 cm (x3);Patient ID: CD;CEL Filename: 031204_CD_2_nm (vi_nm_10).CEL, where \nm\\ is for normal mucosa (colorectal) and \\"po\\" is for polyp (colorectal)\\"\""
GSM215059	GSE8671	rectum_mucosa	Tissue: normal;Location: rectum;Size: 0.2 cm (x3);Patient ID: MA;CEL Filename: 101204_MA_nm (vi_nm_11).CEL, where \nm\\ is for normal mucosa (colorectal) and \\"po\\" is for polyp (colorectal)\\"\""
GSM215060	GSE8671	rectum_mucosa	Tissue: normal;Location: rectum;Size: 0.2 cm (x3);Patient ID: ME;CEL Filename: 101204_ME_nm (vi_nm_12).CEL, where \nm\\ is for normal mucosa (colorectal) and \\"po\\" is for polyp (colorectal)\\"\""
GSM215061	GSE8671	colonic_mucosa	Tissue: normal;Location: descending colon;Size: 0.2 cm (x3);Patient ID: PC;CEL Filename: 230305_PC_2_nm_II (vi_nm_13_II).CEL, where \nm\\ is for normal mucosa (colorectal) and \\"po\\" is for polyp (colorectal)\\"\""
GSM215062	GSE8671	ascending_colon_mucosa	Tissue: normal;Location: ascending colon;Size: 0.2 cm (x3);Patient ID: RA;CEL Filename: 040205_RA_nm (vi_nm_15).CEL, where \nm\\ is for normal mucosa (colorectal) and \\"po\\" is for polyp (colorectal)\\"\""
GSM215063	GSE8671	rectum_mucosa	Tissue: normal;Location: rectum;Size: 0.2 cm (x3);Patient ID: PR;CEL Filename: 040205_PR_nm (vi_nm_16).CEL, where \nm\\ is for normal mucosa (colorectal) and \\"po\\" is for polyp (colorectal)\\"\""
GSM215064	GSE8671	ascending_colon_mucosa	Tissue: normal;Location: ascending colon;Size: 0.2 cm (x3);Patient ID: SD;CEL Filename: 040205_SD_nm (vi_nm_17).CEL, where \nm\\ is for normal mucosa (colorectal) and \\"po\\" is for polyp (colorectal)\\"\""
GSM215065	GSE8671	sigmoid_colon_mucosa	Tissue: normal;Location: sigmoid colon;Size: 0.2 cm (x3);Patient ID: MP;CEL Filename: 040205_MP_nm (vi_nm_18).CEL, where \nm\\ is for normal mucosa (colorectal) and \\"po\\" is for polyp (colorectal)\\"\""
GSM215066	GSE8671	sigmoid_colon_mucosa	Tissue: normal;Location: sigmoid colon;Size: 0.2 cm (x3);Patient ID: MP;CEL Filename: 220205_MP_nm (vi_nm_19).CEL, where \nm\\ is for normal mucosa (colorectal) and \\"po\\" is for polyp (colorectal)\\"\""
GSM215067	GSE8671	rectum_mucosa	Tissue: normal;Location: rectum;Size: 0.2 cm (x3);Patient ID: LG;CEL Filename: 220205_LG_nm (vi_nm_20).CEL, where \nm\\ is for normal mucosa (colorectal) and \\"po\\" is for polyp (colorectal)\\"\""
GSM215068	GSE8671	colonic_mucosa	Tissue: normal;Location: descending colon;Size: 0.2 cm (x3);Patient ID: BG;CEL Filename: 230305_BG_nm_ (vi_nm_22).CEL, where \nm\\ is for normal mucosa (colorectal) and \\"po\\" is for polyp (colorectal)\\"\""
GSM215069	GSE8671	sigmoid_colon_mucosa	Tissue: normal;Location: sigmoid colon;Size: 0.2 cm (x3);Patient ID: LS;CEL Filename: 080605_LS_2_nm (vi_nm_24).CEL, where \nm\\ is for normal mucosa (colorectal) and \\"po\\" is for polyp (colorectal)\\"\""
GSM215070	GSE8671	sigmoid_colon_mucosa	Tissue: normal;Location: sigmoid colon;Size: 0.2 cm (x3);Patient ID: PL;CEL Filename: 080605_PL_nm (vi_nm_26).CEL, where \nm\\ is for normal mucosa (colorectal) and \\"po\\" is for polyp (colorectal)\\"\""
GSM215071	GSE8671	sigmoid_colon_mucosa	Tissue: normal;Location: sigmoid colon;Size: 0.2 cm (x3);Patient ID: SMA;CEL Filename: 080605_SMA_nm (vi_nm_27).CEL, where \nm\\ is for normal mucosa (colorectal) and \\"po\\" is for polyp (colorectal)\\"\""
GSM215072	GSE8671	colonic_mucosa	Tissue: normal;Location: descending colon;Size: 0.2 cm (x3);Patient ID: MR;CEL Filename: 080605_MR_nm (vi_nm_28).CEL, where \nm\\ is for normal mucosa (colorectal) and \\"po\\" is for polyp (colorectal)\\"\""
GSM215073	GSE8671	rectum_mucosa	Tissue: normal;Location: rectum;Size: 0.2 cm (x3);Patient ID: GN;CEL Filename: 210605_GN_nm (vi_nm_29).CEL, where \nm\\ is for normal mucosa (colorectal) and \\"po\\" is for polyp (colorectal)\\"\""
GSM215074	GSE8671	sigmoid_colon_mucosa	Tissue: normal;Location: sigmoid colon;Size: 0.2 cm (x3);Patient ID: BA;CEL Filename: 210605_BA_nm (vi_nm_30).CEL, where \nm\\ is for normal mucosa (colorectal) and \\"po\\" is for polyp (colorectal)\\"\""
GSM215075	GSE8671	sigmoid_colon_mucosa	Tissue: normal;Location: sigmoid colon;Size: 0.2 cm (x3);Patient ID: PF;CEL Filename: 210605_PF_nm (vi_nm_32).CEL, where \nm\\ is for normal mucosa (colorectal) and \\"po\\" is for polyp (colorectal)\\"\""
GSM215076	GSE8671	ascending_colon_mucosa	Tissue: normal;Location: ascending colon;Size: 0.2 cm (x3);Patient ID: RC;CEL Filename: 120705_RC_nm (vi_nm_33).CEL, where \nm\\ is for normal mucosa (colorectal) and \\"po\\" is for polyp (colorectal)\\"\""
GSM215077	GSE8671	sigmoid_colon_mucosa	Tissue: normal;Location: sigmoid colon;Size: 0.2 cm (x3);Patient ID: TMA;CEL Filename: 120705_TMA_nm (vi_nm_34).CEL, where \nm\\ is for normal mucosa (colorectal) and \\"po\\" is for polyp (colorectal)\\"\""
GSM215078	GSE8671	rectum_mucosa	Tissue: normal;Location: rectum;Size: 0.2 cm (x3);Patient ID: NM;CEL Filename: 120705_NM_nm (vi_nm_35).CEL, where \nm\\ is for normal mucosa (colorectal) and \\"po\\" is for polyp (colorectal)\\"\""
GSM215079	GSE8671	sigmoid_colon_mucosa	Tissue: normal;Location: sigmoid colon;Size: 0.2 cm (x3);Patient ID: MA;CEL Filename: 021005_MA_nm (vi_nm_38).CEL, where \nm\\ is for normal mucosa (colorectal) and \\"po\\" is for polyp (colorectal)\\"\""
GSM215080	GSE8671	sigmoid_colon_mucosa	Tissue: normal;Location: sigmoid colon;Size: 0.2 cm (x3);Patient ID: MM;CEL Filename: 021005_MM_nm (vi_nm_39).CEL, where \nm\\ is for normal mucosa (colorectal) and \\"po\\" is for polyp (colorectal)\\"\""
GSM215081	GSE8671	ascending_colon_mucosa	Tissue: normal;Location: ascending colon;Size: 0.2 cm (x3);Patient ID: NF;CEL Filename: 190106_NF_nm (vi_nm_41).CEL, where \nm\\ is for normal mucosa (colorectal) and \\"po\\" is for polyp (colorectal)\\"\""
GSM215082	GSE8671	sigmoid_colon_mucosa	Tissue: normal;Location: sigmoid colon;Size: 0.2 cm (x3);Patient ID: PN;CEL Filename: 190106_PN_nm (vi_nm_42).CEL, where \nm\\ is for normal mucosa (colorectal) and \\"po\\" is for polyp (colorectal)\\"\""
GSM217753	GSE8764	parotid_gland	female, 19 years
GSM217754	GSE8764	parotid_gland	female, 49 years
GSM217755	GSE8764	parotid_gland	female, 65 years
GSM217756	GSE8764	parotid_gland	female, 69 years
GSM217757	GSE8764	parotid_gland	female, 38 years
GSM217758	GSE8764	parotid_gland	male 71 years
GSM217759	GSE8764	parotid_gland	male, 59 years
GSM217760	GSE8764	parotid_gland	female, 38 years
GSM217761	GSE8764	parotid_gland	female, 65 years
GSM217762	GSE8764	parotid_gland	female, 41 years
GSM217763	GSE8764	parotid_gland	male, 62 years
GSM217764	GSE8764	parotid_gland	male, 42 years
GSM217765	GSE8764	parotid_gland	male, 70 years
GSM217766	GSE8762	lymphocytes	Sample Group: control; Gender: female; Age: 30; Tissue: lymphocytes (blood); IT15 CAG repeats: N/A
GSM217767	GSE8762	lymphocytes	Sample Group: control; Gender: female; Age: 39; Tissue: lymphocytes (blood); IT15 CAG repeats: N/A
GSM217768	GSE8762	lymphocytes	Sample Group: control; Gender: female; Age: 51; Tissue: lymphocytes (blood); IT15 CAG repeats: N/A
GSM217769	GSE8762	lymphocytes	Sample Group: control; Gender: female; Age: 60; Tissue: lymphocytes (blood); IT15 CAG repeats: N/A
GSM217770	GSE8762	lymphocytes	Sample Group: control; Gender: female; Age: 68; Tissue: lymphocytes (blood); IT15 CAG repeats: N/A
GSM217771	GSE8762	lymphocytes	Sample Group: control; Gender: male; Age: 38; Tissue: lymphocytes (blood); IT15 CAG repeats: N/A
GSM217772	GSE8762	lymphocytes	Sample Group: control; Gender: male; Age: 42; Tissue: lymphocytes (blood); IT15 CAG repeats: N/A
GSM217773	GSE8762	lymphocytes	Sample Group: control; Gender: male; Age: 46; Tissue: lymphocytes (blood); IT15 CAG repeats: N/A
GSM217774	GSE8762	lymphocytes	Sample Group: control; Gender: male; Age: 50; Tissue: lymphocytes (blood); IT15 CAG repeats: N/A
GSM217775	GSE8762	lymphocytes	Sample Group: control; Gender: male; Age: 60; Tissue: lymphocytes (blood); IT15 CAG repeats: N/A
GSM227514	GSE8977	breast_stroma	NA
GSM227515	GSE8977	breast_stroma	NA
GSM227516	GSE8977	breast_stroma	NA
GSM227517	GSE8977	breast_stroma	NA
GSM227518	GSE8977	breast_stroma	NA
GSM227519	GSE8977	breast_stroma	NA
GSM227520	GSE8977	breast_stroma	NA
GSM227521	GSE8977	breast_stroma	NA
GSM227522	GSE8977	breast_stroma	NA
GSM227523	GSE8977	breast_stroma	NA
GSM227524	GSE8977	breast_stroma	NA
GSM227525	GSE8977	breast_stroma	NA
GSM227526	GSE8977	breast_stroma	NA
GSM227527	GSE8977	breast_stroma	NA
GSM230387	GSE9103	vastus_lateralis	Vastus Lateralis muscle,old sedentary subject
GSM230388	GSE9103	vastus_lateralis	Vastus Lateralis muscle,old sedentary subject
GSM230389	GSE9103	vastus_lateralis	Vastus Lateralis muscle,old sedentary subject
GSM230390	GSE9103	vastus_lateralis	Vastus Lateralis muscle,old sedentary subject
GSM230391	GSE9103	vastus_lateralis	Vastus Lateralis muscle,old sedentary subject
GSM230392	GSE9103	vastus_lateralis	Vastus Lateralis muscle,old sedentary subject
GSM230393	GSE9103	vastus_lateralis	Vastus Lateralis muscle,old sedentary subject
GSM230394	GSE9103	vastus_lateralis	Vastus Lateralis muscle,old sedentary subject
GSM230395	GSE9103	vastus_lateralis	Vastus Lateralis muscle,old sedentary subject
GSM230396	GSE9103	vastus_lateralis	Vastus Lateralis muscle,old sedentary subject
GSM230397	GSE9103	vastus_lateralis	Vastus Lateralis muscle,old trained subject
GSM230398	GSE9103	vastus_lateralis	Vastus Lateralis muscle,old trained subject
GSM230399	GSE9103	vastus_lateralis	Vastus Lateralis muscle,old trained subject
GSM230400	GSE9103	vastus_lateralis	Vastus Lateralis muscle,old trained subject
GSM230401	GSE9103	vastus_lateralis	Vastus Lateralis muscle,old trained subject
GSM230402	GSE9103	vastus_lateralis	Vastus Lateralis muscle,old trained subject
GSM230403	GSE9103	vastus_lateralis	Vastus Lateralis muscle,old trained subject
GSM230404	GSE9103	vastus_lateralis	Vastus Lateralis muscle,old trained subject
GSM230405	GSE9103	vastus_lateralis	Vastus Lateralis muscle,old trained subject
GSM230406	GSE9103	vastus_lateralis	Vastus Lateralis muscle,old trained subject
GSM230407	GSE9103	vastus_lateralis	Vastus Lateralis muscle,young sedentary subject
GSM230408	GSE9103	vastus_lateralis	Vastus Lateralis muscle,young sedentary subject
GSM230409	GSE9103	vastus_lateralis	Vastus Lateralis muscle,young sedentary subject
GSM230410	GSE9103	vastus_lateralis	Vastus Lateralis muscle,young sedentary subject
GSM230411	GSE9103	vastus_lateralis	Vastus Lateralis muscle,young sedentary subject
GSM230412	GSE9103	vastus_lateralis	Vastus Lateralis muscle,young sedentary subject
GSM230413	GSE9103	vastus_lateralis	Vastus Lateralis muscle,young sedentary subject
GSM230414	GSE9103	vastus_lateralis	Vastus Lateralis muscle,young sedentary subject
GSM230415	GSE9103	vastus_lateralis	Vastus Lateralis muscle,young sedentary subject
GSM230416	GSE9103	vastus_lateralis	Vastus Lateralis muscle,young sedentary subject
GSM230417	GSE9103	vastus_lateralis	Vastus Lateralis muscle,young trained subject
GSM230418	GSE9103	vastus_lateralis	Vastus Lateralis muscle,young trained subject
GSM230419	GSE9103	vastus_lateralis	Vastus Lateralis muscle,young trained subject
GSM230420	GSE9103	vastus_lateralis	Vastus Lateralis muscle,young trained subject
GSM230421	GSE9103	vastus_lateralis	Vastus Lateralis muscle,young trained subject
GSM230422	GSE9103	vastus_lateralis	Vastus Lateralis muscle,young trained subject
GSM230423	GSE9103	vastus_lateralis	Vastus Lateralis muscle,young trained subject
GSM230424	GSE9103	vastus_lateralis	Vastus Lateralis muscle,young trained subject
GSM230425	GSE9103	vastus_lateralis	Vastus Lateralis muscle,young trained subject
GSM230426	GSE9103	vastus_lateralis	Vastus Lateralis muscle,young trained subject
GSM234909	GSE9254	sigmoid_colon	NA
GSM234910	GSE9254	sigmoid_colon	NA
GSM234911	GSE9254	rectum_mucosa	NA
GSM234912	GSE9254	colon_cecum	NA
GSM234913	GSE9254	ascending_colon	NA
GSM234914	GSE9254	rectum_mucosa	NA
GSM234915	GSE9254	rectum_mucosa	NA
GSM234916	GSE9254	sigmoid_colon	NA
GSM234917	GSE9254	colon_cecum	NA
GSM234918	GSE9254	ascending_colon	NA
GSM234919	GSE9254	ascending_colon	NA
GSM234920	GSE9254	transverse_colon	NA
GSM234921	GSE9254	transverse_colon	NA
GSM234922	GSE9254	transverse_colon	NA
GSM234923	GSE9254	rectum_mucosa	NA
GSM234924	GSE9254	rectum_mucosa	NA
GSM234925	GSE9254	rectum_mucosa	NA
GSM234926	GSE9254	sigmoid_colon	NA
GSM234927	GSE9254	rectum_mucosa	NA
GSM237984	GSE9348	colon	Sex:M, age:58
GSM237985	GSE9348	colon	Sex:F, age:56
GSM237986	GSE9348	colon	Sex:F, age:54
GSM237987	GSE9348	colon	Sex:F, age:60
GSM237988	GSE9348	colon	Sex:M, age:54
GSM237989	GSE9348	colon	Sex:F, age:57
GSM237990	GSE9348	colon	Sex:M, age:51
GSM237991	GSE9348	colon	Sex:M, age:64
GSM237992	GSE9348	colon	Sex:F, age:67
GSM237993	GSE9348	colon	Sex:M, age:66
GSM237994	GSE9348	colon	Sex:F, age:65
GSM237995	GSE9348	colon	Sex:M, age:59
GSM239380	GSE9419	vastus_lateralis	Protein intake:0.50 g/kg;Trial:P63;Sex: Male;Age: Y (21-43 y)
GSM239381	GSE9419	vastus_lateralis	Protein intake:0.50 g/kg;Trial:P63;Sex: Male;Age: Y (21-43 y)
GSM239382	GSE9419	vastus_lateralis	Protein intake: 0.75 g/kg;Trial: P94;Sex: Male;Age: Y (21-43 y)
GSM239383	GSE9419	vastus_lateralis	Protein intake: 0.75 g/kg;Trial: P94;Sex: Male;Age: Y (21-43 y)
GSM239384	GSE9419	vastus_lateralis	Protein intake: 1.00 g/kg;Trial: P125;Sex: Male;Age: Y (21-43 y)
GSM239385	GSE9419	vastus_lateralis	Protein intake: 1.00 g/kg;Trial: P125;Sex: Male;Age: Y (21-43 y)
GSM239386	GSE9419	vastus_lateralis	Protein intake:0.50 g/kg;Trial:P63;Sex: Male;Age: O (63-79 y)
GSM239387	GSE9419	vastus_lateralis	Protein intake:0.50 g/kg;Trial:P63;Sex: Male;Age: O (63-79 y)
GSM239388	GSE9419	vastus_lateralis	Protein intake: 0.75 g/kg;Trial: P94;Sex: Male;Age: O (63-79 y)
GSM239389	GSE9419	vastus_lateralis	Protein intake: 0.75 g/kg;Trial: P94;Sex: Male;Age: O (63-79 y)
GSM239390	GSE9419	vastus_lateralis	Protein intake: 1.00 g/kg;Trial: P125;Sex: Male;Age: O (63-79 y)
GSM239391	GSE9419	vastus_lateralis	Protein intake: 1.00 g/kg;Trial: P125;Sex: Male;Age: O (63-79 y)
GSM239392	GSE9419	vastus_lateralis	Protein intake:0.50 g/kg;Trial:P63;Sex: Male;Age: Y (21-43 y)
GSM239393	GSE9419	vastus_lateralis	Protein intake:0.50 g/kg;Trial:P63;Sex: Male;Age: Y (21-43 y)
GSM239394	GSE9419	vastus_lateralis	Protein intake:0.50 g/kg;Trial:P63;Sex: Male;Age: Y (21-43 y)
GSM239395	GSE9419	vastus_lateralis	Protein intake:0.50 g/kg;Trial:P63;Sex: Male;Age: Y (21-43 y)
GSM239396	GSE9419	vastus_lateralis	Protein intake:0.50 g/kg;Trial:P63;Sex: Male;Age: Y (21-43 y)
GSM239397	GSE9419	vastus_lateralis	Protein intake:0.50 g/kg;Trial:P63;Sex: Male;Age: Y (21-43 y)
GSM239398	GSE9419	vastus_lateralis	Protein intake:0.50 g/kg;Trial:P63;Sex: Male;Age: Y (21-43 y)
GSM239399	GSE9419	vastus_lateralis	Protein intake:0.50 g/kg;Trial:P63;Sex: Male;Age: Y (21-43 y)
GSM239400	GSE9419	vastus_lateralis	Protein intake:0.50 g/kg;Trial:P63;Sex: Male;Age: Y (21-43 y)
GSM239401	GSE9419	vastus_lateralis	Protein intake:0.50 g/kg;Trial:P63;Sex: Male;Age: Y (21-43 y)
GSM239402	GSE9419	vastus_lateralis	Protein intake: 0.75 g/kg;Trial: P94;Sex: Male;Age: Y (21-43 y)
GSM239403	GSE9419	vastus_lateralis	Protein intake: 0.75 g/kg;Trial: P94;Sex: Male;Age: Y (21-43 y)
GSM239404	GSE9419	vastus_lateralis	Protein intake: 0.75 g/kg;Trial: P94;Sex: Male;Age: Y (21-43 y)
GSM239405	GSE9419	vastus_lateralis	Protein intake: 0.75 g/kg;Trial: P94;Sex: Male;Age: Y (21-43 y)
GSM239406	GSE9419	vastus_lateralis	Protein intake: 0.75 g/kg;Trial: P94;Sex: Male;Age: Y (21-43 y)
GSM239407	GSE9419	vastus_lateralis	Protein intake: 0.75 g/kg;Trial: P94;Sex: Male;Age: Y (21-43 y)
GSM239408	GSE9419	vastus_lateralis	Protein intake: 0.75 g/kg;Trial: P94;Sex: Male;Age: Y (21-43 y)
GSM239409	GSE9419	vastus_lateralis	Protein intake: 0.75 g/kg;Trial: P94;Sex: Male;Age: Y (21-43 y)
GSM239410	GSE9419	vastus_lateralis	Protein intake: 0.75 g/kg;Trial: P94;Sex: Male;Age: Y (21-43 y)
GSM239411	GSE9419	vastus_lateralis	Protein intake: 0.75 g/kg;Trial: P94;Sex: Male;Age: Y (21-43 y)
GSM239412	GSE9419	vastus_lateralis	Protein intake: 1.00 g/kg;Trial: P125;Sex: Male;Age: Y (21-43 y)
GSM239413	GSE9419	vastus_lateralis	Protein intake: 1.00 g/kg;Trial: P125;Sex: Male;Age: Y (21-43 y)
GSM239414	GSE9419	vastus_lateralis	Protein intake: 1.00 g/kg;Trial: P125;Sex: Male;Age: Y (21-43 y)
GSM239415	GSE9419	vastus_lateralis	Protein intake: 1.00 g/kg;Trial: P125;Sex: Male;Age: Y (21-43 y)
GSM239416	GSE9419	vastus_lateralis	Protein intake: 1.00 g/kg;Trial: P125;Sex: Male;Age: Y (21-43 y)
GSM239417	GSE9419	vastus_lateralis	Protein intake: 1.00 g/kg;Trial: P125;Sex: Male;Age: Y (21-43 y)
GSM239418	GSE9419	vastus_lateralis	Protein intake: 1.00 g/kg;Trial: P125;Sex: Male;Age: Y (21-43 y)
GSM239419	GSE9419	vastus_lateralis	Protein intake: 1.00 g/kg;Trial: P125;Sex: Male;Age: Y (21-43 y)
GSM239420	GSE9419	vastus_lateralis	Protein intake: 1.00 g/kg;Trial: P125;Sex: Male;Age: Y (21-43 y)
GSM239421	GSE9419	vastus_lateralis	Protein intake: 1.00 g/kg;Trial: P125;Sex: Male;Age: Y (21-43 y)
GSM239422	GSE9419	vastus_lateralis	Protein intake:0.50 g/kg;Trial:P63;Sex: Male;Age: O (63-79 y)
GSM239423	GSE9419	vastus_lateralis	Protein intake:0.50 g/kg;Trial:P63;Sex: Male;Age: O (63-79 y)
GSM239424	GSE9419	vastus_lateralis	Protein intake:0.50 g/kg;Trial:P63;Sex: Male;Age: O (63-79 y)
GSM239425	GSE9419	vastus_lateralis	Protein intake:0.50 g/kg;Trial:P63;Sex: Male;Age: O (63-79 y)
GSM239426	GSE9419	vastus_lateralis	Protein intake:0.50 g/kg;Trial:P63;Sex: Male;Age: O (63-79 y)
GSM239427	GSE9419	vastus_lateralis	Protein intake:0.50 g/kg;Trial:P63;Sex: Male;Age: O (63-79 y)
GSM239428	GSE9419	vastus_lateralis	Protein intake:0.50 g/kg;Trial:P63;Sex: Male;Age: O (63-79 y)
GSM239429	GSE9419	vastus_lateralis	Protein intake:0.50 g/kg;Trial:P63;Sex: Male;Age: O (63-79 y)
GSM239430	GSE9419	vastus_lateralis	Protein intake: 0.75 g/kg;Trial: P94;Sex: Male;Age: O (63-79 y)
GSM239431	GSE9419	vastus_lateralis	Protein intake: 0.75 g/kg;Trial: P94;Sex: Male;Age: O (63-79 y)
GSM239432	GSE9419	vastus_lateralis	Protein intake: 0.75 g/kg;Trial: P94;Sex: Male;Age: O (63-79 y)
GSM239433	GSE9419	vastus_lateralis	Protein intake: 0.75 g/kg;Trial: P94;Sex: Male;Age: O (63-79 y)
GSM239434	GSE9419	vastus_lateralis	Protein intake: 0.75 g/kg;Trial: P94;Sex: Male;Age: O (63-79 y)
GSM239435	GSE9419	vastus_lateralis	Protein intake: 0.75 g/kg;Trial: P94;Sex: Male;Age: O (63-79 y)
GSM239436	GSE9419	vastus_lateralis	Protein intake: 0.75 g/kg;Trial: P94;Sex: Male;Age: O (63-79 y)
GSM239437	GSE9419	vastus_lateralis	Protein intake: 0.75 g/kg;Trial: P94;Sex: Male;Age: O (63-79 y)
GSM239438	GSE9419	vastus_lateralis	Protein intake: 1.00 g/kg;Trial: P125;Sex: Male;Age: O (63-79 y)
GSM239439	GSE9419	vastus_lateralis	Protein intake: 1.00 g/kg;Trial: P125;Sex: Male;Age: O (63-79 y)
GSM239440	GSE9419	vastus_lateralis	Protein intake: 1.00 g/kg;Trial: P125;Sex: Male;Age: O (63-79 y)
GSM239441	GSE9419	vastus_lateralis	Protein intake: 1.00 g/kg;Trial: P125;Sex: Male;Age: O (63-79 y)
GSM239442	GSE9419	vastus_lateralis	Protein intake: 1.00 g/kg;Trial: P125;Sex: Male;Age: O (63-79 y)
GSM239443	GSE9419	vastus_lateralis	Protein intake: 1.00 g/kg;Trial: P125;Sex: Male;Age: O (63-79 y)
GSM239444	GSE9419	vastus_lateralis	Protein intake: 1.00 g/kg;Trial: P125;Sex: Male;Age: O (63-79 y)
GSM239445	GSE9419	vastus_lateralis	Protein intake: 1.00 g/kg;Trial: P125;Sex: Male;Age: O (63-79 y)
GSM240023	GSE9452	colonic_mucosa	NA
GSM240024	GSE9452	colonic_mucosa	NA
GSM240025	GSE9452	colonic_mucosa	NA
GSM240026	GSE9452	colonic_mucosa	NA
GSM240027	GSE9452	colonic_mucosa	NA
GSM240832	GSE9489;GSE9493	kidney	Patient identifier: C01, Sex: female, Age of patient: 61, Serum creatinine: 65 microMol/L, Control kidney sample from nephrectomy
GSM240833	GSE9489;GSE9493	kidney	Patient identifier: C03, Sex: male, Age of patient: 71, Serum creatinine: 61 microMol/L, Control kidney sample from nephrectomy
GSM240834	GSE9489;GSE9493	kidney	Patient identifier: C04, Sex: male, Age of patient: 28, Serum creatinine: 75 microMol/L, Control kidney sample from nephrectomy
GSM240835	GSE9489;GSE9493	kidney	Patient identifier: C05, Sex: female, Age of patient: 37, Serum creatinine: 36 microMol/L, Control kidney sample from nephrectomy
GSM240836	GSE9489;GSE9493	kidney	Patient identifier: C06, Sex: male, Age of patient: 44, Serum creatinine: 88 microMol/L, Control kidney from nephrectomy sample with clamping
GSM240837	GSE9489;GSE9493	kidney	Patient identifier: C06, Sex: male, Age of patient: 44, Serum creatinine: 88 microMol/L, Control kidney from nephrectomy sample without clamping
GSM240838	GSE9489;GSE9493	kidney	Patient identifier: C10, Sex: male, Age of patient: 64, Serum creatinine: 91 microMol/L, Control kidney sample from nephrectomy
GSM240839	GSE9489;GSE9493	kidney	Patient identifier: C11, Sex: male, Age of patient: 82, Serum creatinine: 113 microMol/L, Control kidney sample (cortex) from nephrectomy
GSM240840	GSE9489;GSE9493	kidney	Patient identifier: C11, Sex: male, Age of patient: 82, Serum creatinine: 113 microMol/L, Control kidney sample (cortex+medulla) from nephrectomy
GSM240841	GSE9489;GSE9493	kidney	Patient identifier: C13, Sex: male, Age of patient: 76, Serum creatinine: 88 microMol/L, Control kidney sample from nephrectomy
GSM240842	GSE9489;GSE9493	kidney	Patient identifier: C14, Sex: male, Age of patient: 74, Serum creatinine: 107 microMol/L, Control kidney sample from nephrectomy
GSM240843	GSE9489;GSE9493	kidney	Patient identifier: C15, Sex: male, Age of patient: 60, Serum creatinine: 93 microMol/L, Control kidney sample from nephrectomy
GSM240844	GSE9489;GSE9493	kidney	Patient identifier: C16, Sex: male, Age of patient: 71, Serum creatinine: 114 microMol/L, Control kidney sample from nephrectomy
GSM240947	GSE9492;GSE9493	kidney	Patient identifier: 281004-L7, Control kidney sample from nephrectomy
GSM240948	GSE9492;GSE9493	kidney	Pool of 5 normal adult kidney samples, Sex: male, Age: 24-26-46-49-62, Lot#A507273
GSM242031	GSE9576	ileal_mucosa	Cell type: Normal cells;Tumor stage: Non tumor
GSM242032	GSE9576	ileal_mucosa	Cell type: Normal cells;Tumor stage: Non tumor
GSM242033	GSE9576	ileal_mucosa	Cell type: Normal cells;Tumor stage: Non tumor
GSM242037	GSE9576	mucosa	Cell type: Normal cells;Tumor stage: Non tumor
GSM242038	GSE9576	mucosa	Cell type: Normal cells;Tumor stage: Non tumor
GSM242039	GSE9576	mucosa	Cell type: Normal cells;Tumor stage: Non tumor
GSM243215	GSE9624	adipose_tissue_omental	Tissue:omental_adipose_tissue;Group: normal weigth;Gender: M;Age: 10 year;z score BMI: -1.45
GSM243216	GSE9624	adipose_tissue_omental	Tissue:omental_adipose_tissue Group: normal weigth Gender: M Age: 7 year z score BMI: 0.49
GSM243217	GSE9624	adipose_tissue_omental	Tissue:omental_adipose_tissue Group: normal weigth Gender: F Age: 8 year z score BMI: 0.12
GSM243218	GSE9624	adipose_tissue_omental	Tissue:omental_adipose_tissue Group: normal weigth Gender: M Age: 10 year z score BMI: -1.81
GSM243219	GSE9624	adipose_tissue_omental	Tissue:omental_adipose_tissue Group: normal weigth Gender: M Age: 7 year z score BMI: -0.64
GSM243220	GSE9624	adipose_tissue_omental	Tissue:omental_adipose_tissue Group: normal weigth Gender: M Age: 7 year z score BMI: -0.36
GSM243227	GSE9624	adipose_tissue	NA
GSM245939	GSE9731	epididimus_corpus	Vasectomised epididimus,1980, corpus segment
GSM245940	GSE9731	epididimus_caput	Vasectomised epididimus,1980, caput segment
GSM245941	GSE9731	epididimus_cauda	Vasectomised epididimus,1980, cauda segment
GSM245942	GSE9731	epididimus_corpus	Vasectomised epididimus,45 years-old, corpus segment
GSM245943	GSE9731	epididimus_caput	Vasectomised epididimus,45 years-old, caput segment
GSM245944	GSE9731	epididimus_cauda	Vasectomised epididimus,45 years-old, cauda segment
GSM245945	GSE9731	epididimus_corpus	Vasectomised epididimus,47 years-old, corpus segment
GSM245946	GSE9731	epididimus_caput	Vasectomised epididimus,47 years-old, caput segment
GSM245947	GSE9731	epididimus_cauda	Vasectomised epididimus,47years-old, cauda segment
GSM252349	GSE9984	placenta	first trimester
GSM252350	GSE9984	placenta	first trimester
GSM252351	GSE9984	placenta	first trimester
GSM252352	GSE9984	placenta	first trimester
GSM252353	GSE9984	placenta	second trimester
GSM252354	GSE9984	placenta	second trimester
GSM252355	GSE9984	placenta	second trimester
GSM252356	GSE9984	placenta	second trimester
GSM252357	GSE9984	placenta	term placenta
GSM252358	GSE9984	placenta	term placenta
GSM252359	GSE9984	placenta	term placenta
GSM252360	GSE9984	placenta	term placenta
GSM260516	GSE10406	sinus_mucosa	disease state:normal
GSM260521	GSE10406	sinus_mucosa	disease state:normal
GSM260522	GSE10406	sinus_mucosa	disease state:normal
GSM260524	GSE10406	sinus_mucosa	disease state:normal
GSM260526	GSE10406	sinus_mucosa	disease state:normal
GSM260527	GSE10406	sinus_mucosa	disease state:normal
GSM260528	GSE10406	sinus_mucosa	disease state:normal
GSM260531	GSE10406	sinus_mucosa	disease state:normal
GSM260532	GSE10406	sinus_mucosa	disease state:normal
GSM270808	GSE10714	colon	NA
GSM270809	GSE10714	colon	NA
GSM270810	GSE10714	colon	NA
GSM270834	GSE10715	blood	NA
GSM270835	GSE10715	blood	NA
GSM270836	GSE10715	blood	NA
GSM270837	GSE10715	blood	NA
GSM270838	GSE10715	blood	NA
GSM270839	GSE10715	blood	NA
GSM270840	GSE10715	blood	NA
GSM270841	GSE10715	blood	NA
GSM270842	GSE10715	blood	NA
GSM270843	GSE10715	blood	NA
GSM270844	GSE10715	blood	NA
GSM271331	GSE10746	buccal_mucosa	BRENC1, healthy control
GSM271332	GSE10746	buccal_mucosa	BRENC2, healthy control
GSM271333	GSE10746	buccal_mucosa	BRENC3, healthy control
GSM272133	GSE10780	breast	NA
GSM272134	GSE10780	breast	NA
GSM272135	GSE10780	breast	NA
GSM272136	GSE10780	breast	NA
GSM272137	GSE10780	breast	NA
GSM272138	GSE10780	breast	NA
GSM272139	GSE10780	breast	NA
GSM272140	GSE10780	breast	NA
GSM272141	GSE10780	breast	NA
GSM272142	GSE10780	breast	NA
GSM272143	GSE10780	breast	NA
GSM272144	GSE10780	breast	NA
GSM272145	GSE10780	breast	NA
GSM272146	GSE10780	breast	NA
GSM272147	GSE10780	breast	NA
GSM272148	GSE10780	breast	NA
GSM272149	GSE10780	breast	NA
GSM272150	GSE10780	breast	NA
GSM272151	GSE10780	breast	NA
GSM272152	GSE10780	breast	NA
GSM272154	GSE10780	breast	NA
GSM272155	GSE10780	breast	NA
GSM272156	GSE10780	breast	NA
GSM272157	GSE10780	breast	NA
GSM272158	GSE10780	breast	NA
GSM272159	GSE10780	breast	NA
GSM272160	GSE10780	breast	NA
GSM272161	GSE10780	breast	NA
GSM272162	GSE10780	breast	NA
GSM272163	GSE10780	breast	NA
GSM272164	GSE10780	breast	NA
GSM272168	GSE10780	breast	NA
GSM272169	GSE10780	breast	NA
GSM272170	GSE10780	breast	NA
GSM272171	GSE10780	breast	NA
GSM272172	GSE10780	breast	NA
GSM272174	GSE10780	breast	NA
GSM272175	GSE10780	breast	NA
GSM272176	GSE10780	breast	NA
GSM272177	GSE10780	breast	NA
GSM272180	GSE10780	breast	NA
GSM272181	GSE10780	breast	NA
GSM272182	GSE10780	breast	NA
GSM272183	GSE10780	breast	NA
GSM272190	GSE10780	breast	NA
GSM272191	GSE10780	breast	NA
GSM272192	GSE10780	breast	NA
GSM272193	GSE10780	breast	NA
GSM272194	GSE10780	breast	NA
GSM272195	GSE10780	breast	NA
GSM272196	GSE10780	breast	NA
GSM272197	GSE10780	breast	NA
GSM272198	GSE10780	breast	NA
GSM272199	GSE10780	breast	NA
GSM272201	GSE10780	breast	NA
GSM272202	GSE10780	breast	NA
GSM272204	GSE10780	breast	NA
GSM272205	GSE10780	breast	NA
GSM272206	GSE10780	breast	NA
GSM272207	GSE10780	breast	NA
GSM272208	GSE10780	breast	NA
GSM272210	GSE10780	breast	NA
GSM272212	GSE10780	breast	NA
GSM272214	GSE10780	breast	NA
GSM272215	GSE10780	breast	NA
GSM272218	GSE10780	breast	NA
GSM272219	GSE10780	breast	NA
GSM272220	GSE10780	breast	NA
GSM272222	GSE10780	breast	NA
GSM272223	GSE10780	breast	NA
GSM272224	GSE10780	breast	NA
GSM272226	GSE10780	breast	NA
GSM272227	GSE10780	breast	NA
GSM272228	GSE10780	breast	NA
GSM272229	GSE10780	breast	NA
GSM272230	GSE10780	breast	NA
GSM272232	GSE10780	breast	NA
GSM272233	GSE10780	breast	NA
GSM272234	GSE10780	breast	NA
GSM272235	GSE10780	breast	NA
GSM272236	GSE10780	breast	NA
GSM272237	GSE10780	breast	NA
GSM272238	GSE10780	breast	NA
GSM272239	GSE10780	breast	NA
GSM272240	GSE10780	breast	NA
GSM272241	GSE10780	breast	NA
GSM272244	GSE10780	breast	NA
GSM272248	GSE10780	breast	NA
GSM272249	GSE10780	breast	NA
GSM272250	GSE10780	breast	NA
GSM272251	GSE10780	breast	NA
GSM272255	GSE10780	breast	NA
GSM272256	GSE10780	breast	NA
GSM272257	GSE10780	breast	NA
GSM272258	GSE10780	breast	NA
GSM272259	GSE10780	breast	NA
GSM272260	GSE10780	breast	NA
GSM272261	GSE10780	breast	NA
GSM272263	GSE10780	breast	NA
GSM272264	GSE10780	breast	NA
GSM272265	GSE10780	breast	NA
GSM272266	GSE10780	breast	NA
GSM272267	GSE10780	breast	NA
GSM272268	GSE10780	breast	NA
GSM272269	GSE10780	breast	NA
GSM272270	GSE10780	breast	NA
GSM272271	GSE10780	breast	NA
GSM272273	GSE10780	breast	NA
GSM272274	GSE10780	breast	NA
GSM272275	GSE10780	breast	NA
GSM272276	GSE10780	breast	NA
GSM272277	GSE10780	breast	NA
GSM272278	GSE10780	breast	NA
GSM272279	GSE10780	breast	NA
GSM272281	GSE10780	breast	NA
GSM272282	GSE10780	breast	NA
GSM272283	GSE10780	breast	NA
GSM272284	GSE10780	breast	NA
GSM272285	GSE10780	breast	NA
GSM272286	GSE10780	breast	NA
GSM272288	GSE10780	breast	NA
GSM272289	GSE10780	breast	NA
GSM272291	GSE10780	breast	NA
GSM272292	GSE10780	breast	NA
GSM272293	GSE10780	breast	NA
GSM272294	GSE10780	breast	NA
GSM272295	GSE10780	breast	NA
GSM272296	GSE10780	breast	NA
GSM272297	GSE10780	breast	NA
GSM272298	GSE10780	breast	NA
GSM272299	GSE10780	breast	NA
GSM272302	GSE10780	breast	NA
GSM272303	GSE10780	breast	NA
GSM272305	GSE10780	breast	NA
GSM272306	GSE10780	breast	NA
GSM272307	GSE10780	breast	NA
GSM272308	GSE10780	breast	NA
GSM272311	GSE10780	breast	NA
GSM272312	GSE10780	breast	NA
GSM272313	GSE10780	breast	NA
GSM272314	GSE10780	breast	NA
GSM272315	GSE10780	breast	NA
GSM272317	GSE10780	breast	NA
GSM272418	GSE10791	sigmoid_colon	sigmoid colon biopsy from 5 normal healthy individuals
GSM272770	GSE10799	lung	female pulmonary adenocarcinoma;normal tissue
GSM272771	GSE10799	lung	female pulmonary adenocarcinoma;normal tissue
GSM272772	GSE10799	lung	male pulmonary lung;normal tissue
GSM272923	GSE10810	breast	t: S;n: 0;histology: 0;grade: 0;receptor: 0;ki-67: 0;tumor (t) vs healthy (s): S;phenotypes: S
GSM272924	GSE10810	breast	t: S;n: 0;histology: 0;grade: 0;receptor: 0;ki-67: 0;tumor (t) vs healthy (s): S;phenotypes: S
GSM272925	GSE10810	breast	t: S;n: 0;histology: 0;grade: 0;receptor: 0;ki-67: 0;tumor (t) vs healthy (s): S;phenotypes: S
GSM272926	GSE10810	breast	t: S;n: 0;histology: 0;grade: 0;receptor: 0;ki-67: 0;tumor (t) vs healthy (s): S;phenotypes: S
GSM272927	GSE10810	breast	t: S;n: 0;histology: 0;grade: 0;receptor: 0;ki-67: 0;tumor (t) vs healthy (s): S;phenotypes: S
GSM272928	GSE10810	breast	t: S;n: 0;histology: 0;grade: 0;receptor: 0;ki-67: 0;tumor (t) vs healthy (s): S;phenotypes: S
GSM272929	GSE10810	breast	t: S;n: 0;histology: 0;grade: 0;receptor: 0;ki-67: 0;tumor (t) vs healthy (s): S;phenotypes: S
GSM272930	GSE10810	breast	t: S;n: 0;histology: 0;grade: 0;receptor: 0;ki-67: 0;tumor (t) vs healthy (s): S;phenotypes: S
GSM272931	GSE10810	breast	t: S;n: 0;histology: 0;grade: 0;receptor: 0;ki-67: 0;tumor (t) vs healthy (s): S;phenotypes: S
GSM272932	GSE10810	breast	t: S;n: 0;histology: 0;grade: 0;receptor: 0;ki-67: 0;tumor (t) vs healthy (s): S;phenotypes: S
GSM272933	GSE10810	breast	t: S;n: 0;histology: 0;grade: 0;receptor: 0;ki-67: 0;tumor (t) vs healthy (s): S;phenotypes: S
GSM272934	GSE10810	breast	t: S;n: 0;histology: 0;grade: 0;receptor: 0;ki-67: 0;tumor (t) vs healthy (s): S;phenotypes: S
GSM272935	GSE10810	breast	t: S;n: 0;histology: 0;grade: 0;receptor: 0;ki-67: 0;tumor (t) vs healthy (s): S;phenotypes: S
GSM272936	GSE10810	breast	t: S;n: 0;histology: 0;grade: 0;receptor: 0;ki-67: 0;tumor (t) vs healthy (s): S;phenotypes: S
GSM272937	GSE10810	breast	t: S;n: 0;histology: 0;grade: 0;receptor: 0;ki-67: 0;tumor (t) vs healthy (s): S;phenotypes: S
GSM272938	GSE10810	breast	t: S;n: 0;histology: 0;grade: 0;receptor: 0;ki-67: 0;tumor (t) vs healthy (s): S;phenotypes: S
GSM272939	GSE10810	breast	t: S;n: 0;histology: 0;grade: 0;receptor: 0;ki-67: 0;tumor (t) vs healthy (s): S;phenotypes: S
GSM272940	GSE10810	breast	t: S;n: 0;histology: 0;grade: 0;receptor: 0;ki-67: 0;tumor (t) vs healthy (s): S;phenotypes: S
GSM272941	GSE10810	breast	t: S;n: 0;histology: 0;grade: 0;receptor: 0;ki-67: 0;tumor (t) vs healthy (s): S;phenotypes: S
GSM272942	GSE10810	breast	t: S;n: 0;histology: 0;grade: 0;receptor: 0;ki-67: 0;tumor (t) vs healthy (s): S;phenotypes: S
GSM272943	GSE10810	breast	t: S;n: 0;histology: 0;grade: 0;receptor: 0;ki-67: 0;tumor (t) vs healthy (s): S;phenotypes: S
GSM272944	GSE10810	breast	t: S;n: 0;histology: 0;grade: 0;receptor: 0;ki-67: 0;tumor (t) vs healthy (s): S;phenotypes: S
GSM272945	GSE10810	breast	t: S;n: 0;histology: 0;grade: 0;receptor: 0;ki-67: 0;tumor (t) vs healthy (s): S;phenotypes: S
GSM272946	GSE10810	breast	t: S;n: 0;histology: 0;grade: 0;receptor: 0;ki-67: 0;tumor (t) vs healthy (s): S;phenotypes: S
GSM272947	GSE10810	breast	t: S;n: 0;histology: 0;grade: 0;receptor: 0;ki-67: 0;tumor (t) vs healthy (s): S;phenotypes: S
GSM272948	GSE10810	breast	t: S;n: 0;histology: 0;grade: 0;receptor: 0;ki-67: 0;tumor (t) vs healthy (s): S;phenotypes: S
GSM272949	GSE10810	breast	t: S;n: 0;histology: 0;grade: 0;receptor: 0;ki-67: 0;tumor (t) vs healthy (s): S;phenotypes: S
GSM277090	GSE10927	adrenal_gland_cortex	age: 71;sex: F;side of body: Left;Cinical characteristics: Adrenalectomy for metastatic lung carcinoma;tumor diameter (cm): not applicable;tumor weight (gm): not applicable;Weiss Grade of tumor: not applicable;Mitotic rate of tumor: not applicable;Tumor stage: not applicable;Adrenocortical Carcinoma cluster in our analysis: not applicable;Years to last followup: not applicable;dead or alive at la…
GSM277091	GSE10927	adrenal_gland_cortex	age: 58;sex: F;side of body: Right;Cinical characteristics: Adrenalectomy for ACA; Conn's syndrome;tumor diameter (cm): not applicable;tumor weight (gm): not applicable;Weiss Grade of tumor: not applicable;Mitotic rate of tumor: not applicable;Tumor stage: not applicable;Adrenocortical Carcinoma cluster in our analysis: not applicable;Years to last followup: not applicable;dead or alive at last f…
GSM277092	GSE10927	adrenal_gland_cortex	age: 71;sex: M;side of body: Right;Cinical characteristics: Adrenalectomy for renal cell carcinoma;tumor diameter (cm): not applicable;tumor weight (gm): not applicable;Weiss Grade of tumor: not applicable;Mitotic rate of tumor: not applicable;Tumor stage: not applicable;Adrenocortical Carcinoma cluster in our analysis: not applicable;Years to last followup: not applicable;dead or alive at last f…
GSM277093	GSE10927	adrenal_gland_cortex	age: 44;sex: M;side of body: Left;Cinical characteristics: Adrenalectomy for ACA; Conn's syndrome;tumor diameter (cm): not applicable;tumor weight (gm): not applicable;Weiss Grade of tumor: not applicable;Mitotic rate of tumor: not applicable;Tumor stage: not applicable;Adrenocortical Carcinoma cluster in our analysis: not applicable;Years to last followup: not applicable;dead or alive at last fo…
GSM277094	GSE10927	adrenal_gland_cortex	age: 32;sex: F;side of body: Right;Cinical characteristics: Adrenalectomy for ACA;tumor diameter (cm): not applicable;tumor weight (gm): not applicable;Weiss Grade of tumor: not applicable;Mitotic rate of tumor: not applicable;Tumor stage: not applicable;Adrenocortical Carcinoma cluster in our analysis: not applicable;Years to last followup: not applicable;dead or alive at last followup: not appl…
GSM277095	GSE10927	adrenal_gland_cortex	age: 28;sex: M;side of body: Left;Cinical characteristics: Adrenalectomy for pheochromocytoma (Multiple Endocrine Neoplasia, Type IIA);tumor diameter (cm): not applicable;tumor weight (gm): not applicable;Weiss Grade of tumor: not applicable;Mitotic rate of tumor: not applicable;Tumor stage: not applicable;Adrenocortical Carcinoma cluster in our analysis: not applicable;Years to last followup: no…
GSM277096	GSE10927	adrenal_gland_cortex	age: 55;sex: M;side of body: Left;Cinical characteristics: Adrenalectomy for multinodular cortical hyperplasia; Conn's syndrome;tumor diameter (cm): not applicable;tumor weight (gm): not applicable;Weiss Grade of tumor: not applicable;Mitotic rate of tumor: not applicable;Tumor stage: not applicable;Adrenocortical Carcinoma cluster in our analysis: not applicable;Years to last followup: not appli…
GSM277097	GSE10927	adrenal_gland_cortex	age: 78;sex: M;side of body: Left;Cinical characteristics: Adrenalectomy for renal cell carcinoma;tumor diameter (cm): not applicable;tumor weight (gm): not applicable;Weiss Grade of tumor: not applicable;Mitotic rate of tumor: not applicable;Tumor stage: not applicable;Adrenocortical Carcinoma cluster in our analysis: not applicable;Years to last followup: not applicable;dead or alive at last fo…
GSM277098	GSE10927	adrenal_gland_cortex	age: 41;sex: M;side of body: unknown;Cinical characteristics: Adrenalectomy for renal cell carcinoma;tumor diameter (cm): not applicable;tumor weight (gm): not applicable;Weiss Grade of tumor: not applicable;Mitotic rate of tumor: not applicable;Tumor stage: not applicable;Adrenocortical Carcinoma cluster in our analysis: not applicable;Years to last followup: not applicable;dead or alive at last…
GSM277099	GSE10927	adrenal_gland_cortex	age: 58;sex: M;side of body: Left;Cinical characteristics: Adrenalectomy for pheochromocytoma;tumor diameter (cm): not applicable;tumor weight (gm): not applicable;Weiss Grade of tumor: not applicable;Mitotic rate of tumor: not applicable;Tumor stage: not applicable;Adrenocortical Carcinoma cluster in our analysis: not applicable;Years to last followup: not applicable;dead or alive at last follow…
GSM277776	GSE10971	fallopian_tube_epithelium	Age: 46;Cycle: Luteal;BRCA1/2 mutation: NA;Family History: No
GSM277777	GSE10971	fallopian_tube_epithelium	Age: 46;Cycle: Luteal;BRCA1/2 mutation: NA;Family History: No
GSM277778	GSE10971	fallopian_tube_epithelium	Age: 42;Cycle: Luteal;BRCA1/2 mutation: NA;Family History: No
GSM277779	GSE10971	fallopian_tube_epithelium	Age: 36;Cycle: Luteal;BRCA1/2 mutation: NA;Family History: No
GSM277780	GSE10971	fallopian_tube_epithelium	Age: 43;Cycle: Luteal;BRCA1/2 mutation: NA;Family History: No
GSM277781	GSE10971	fallopian_tube_epithelium	Age: 47;Cycle: Luteal;BRCA1/2 mutation: NA;Family History: No
GSM277782	GSE10971	fallopian_tube_epithelium	Age: 41;Cycle: Follicular;BRCA1/2 mutation: NA;Family History: No
GSM277783	GSE10971	fallopian_tube_epithelium	Age: 42;Cycle: Follicular;BRCA1/2 mutation: NA;Family History: No
GSM277784	GSE10971	fallopian_tube_epithelium	Age: 46;Cycle: Follicular;BRCA1/2 mutation: NA;Family History: No
GSM277785	GSE10971	fallopian_tube_epithelium	Age: 47;Cycle: Follicular;BRCA1/2 mutation: NA;Family History: No
GSM277786	GSE10971	fallopian_tube_epithelium	Age: 50;Cycle: Follicular;BRCA1/2 mutation: NA;Family History: No
GSM277787	GSE10971	fallopian_tube_epithelium	Age: 48;Cycle: Follicular;BRCA1/2 mutation: NA;Family History: No
GSM279060	GSE11045	kidney	human male
GSM279061	GSE11045	kidney	human male
GSM279062	GSE11045	kidney	human male
GSM279063	GSE11045	liver	human male
GSM279064	GSE11045	liver	human male
GSM279065	GSE11045	liver	human male
GSM279585	GSE11057	pbmc	NA
GSM279586	GSE11057	pbmc	NA
GSM279587	GSE11057	pbmc	NA
GSM279588	GSE11057	pbmc	NA
GSM279755	GSE11083	pbmc	NA
GSM279756	GSE11083	pbmc	NA
GSM279757	GSE11083	pbmc	NA
GSM279758	GSE11083	pbmc	NA
GSM279759	GSE11083	pbmc	NA
GSM279760	GSE11083	pbmc	NA
GSM279761	GSE11083	pbmc	NA
GSM279762	GSE11083	pbmc	NA
GSM279763	GSE11083	pbmc	NA
GSM279764	GSE11083	pbmc	NA
GSM279765	GSE11083	pbmc	NA
GSM279766	GSE11083	pbmc	NA
GSM279767	GSE11083	pbmc	NA
GSM279768	GSE11083	pbmc	NA
GSM279769	GSE11083	pbmc	NA
GSM281311	GSE11151	kidney	NA
GSM281312	GSE11151	kidney	NA
GSM281314	GSE11151	kidney	NA
GSM281315	GSE11151	kidney	NA
GSM281316	GSE11151	kidney	NA
GSM283064	GSE11227	blood	NA
GSM283065	GSE11227	blood	NA
GSM283066	GSE11227	blood	NA
GSM283067	GSE11227	blood	NA
GSM283068	GSE11227	blood	NA
GSM283069	GSE11227	blood	NA
GSM283070	GSE11227	blood	NA
GSM283071	GSE11227	blood	NA
GSM284858	GSE11281	pbmc	NA
GSM284861	GSE11281	pbmc	NA
GSM284864	GSE11281	pbmc	NA
GSM287288	GSE11375	blood	age: 20;gender: male;final disposition: control
GSM287289	GSE11375	blood	age: 34;gender: female;final disposition: control
GSM287290	GSE11375	blood	age: 40;gender: female;final disposition: control
GSM287291	GSE11375	blood	age: 31;gender: male;final disposition: control
GSM287292	GSE11375	blood	age: 21;gender: female;final disposition: control
GSM287293	GSE11375	blood	age: 43;gender: male;final disposition: control
GSM287294	GSE11375	blood	age: 18;gender: female;final disposition: control
GSM287295	GSE11375	blood	age: 26;gender: male;final disposition: control
GSM287296	GSE11375	blood	age: 29;gender: female;final disposition: 88: Other (specify)
GSM287297	GSE11375	blood	age: 31;gender: male;final disposition: 06: Home
GSM287377	GSE11375	blood	age: 19;gender: female;final disposition: 06: Home
GSM287378	GSE11375	blood	age: 17;gender: female;final disposition: 01: Inpatient rehabilitation facility
GSM287379	GSE11375	blood	age: 46;gender: male;final disposition: 05: Home with services
GSM287380	GSE11375	blood	age: 23;gender: male;final disposition: 05: Home with services
GSM287381	GSE11375	blood	age: 34;gender: female;final disposition: 06: Home
GSM287382	GSE11375	blood	age: 54;gender: male;final disposition: 06: Home
GSM287383	GSE11375	blood	age: 29;gender: male;final disposition: 06: Home
GSM287384	GSE11375	blood	age: 18;gender: male;final disposition: control
GSM287385	GSE11375	blood	age: 33;gender: female;final disposition: 07: Another acute care facility
GSM287386	GSE11375	blood	age: 20;gender: male;final disposition: 06: Home
GSM287387	GSE11375	blood	age: 48;gender: male;final disposition: 05: Home with services
GSM287388	GSE11375	blood	age: 41;gender: male;final disposition: 02: Skilled nursing facility
GSM287389	GSE11375	blood	age: 25;gender: male;final disposition: 06: Home
GSM287390	GSE11375	blood	age: 25;gender: male;final disposition: 05: Home with services
GSM287391	GSE11375	blood	age: 25;gender: male;final disposition: 01: Inpatient rehabilitation facility
GSM287392	GSE11375	blood	age: 27;gender: male;final disposition: 02: Skilled nursing facility
GSM289612	GSE11504	bone_marrow	human age 2 months
GSM289613	GSE11504	bone_marrow	human age 3 months
GSM289614	GSE11504	bone_marrow	human age 9 months
GSM289615	GSE11504	bone_marrow	human age 20 months
GSM289616	GSE11504	bone_marrow	human age 23 months
GSM289617	GSE11504	bone_marrow	human age 32 months
GSM289618	GSE11504	bone_marrow	human age 39 months
GSM289619	GSE11504	bone_marrow	human age 57 months
GSM289620	GSE11504	bone_marrow	human age 59 months
GSM289621	GSE11504	bone_marrow	human age 65 months
GSM289622	GSE11504	bone_marrow	human age 74 months
GSM289623	GSE11504	bone_marrow	human age 78 months
GSM289624	GSE11504	bone_marrow	human age 88 months
GSM289625	GSE11504	bone_marrow	human age 112 months
GSM289626	GSE11504	bone_marrow	human age 119 months
GSM289627	GSE11504	bone_marrow	human age 126 months
GSM289628	GSE11504	bone_marrow	human age 129 months
GSM289629	GSE11504	bone_marrow	human age 144 months
GSM289630	GSE11504	bone_marrow	human age 168 months
GSM289631	GSE11504	bone_marrow	human age 197 months
GSM289632	GSE11504	bone_marrow	human age 313 months
GSM289633	GSE11504	bone_marrow	human age 338 months
GSM289634	GSE11504	bone_marrow	human age 347 months
GSM289635	GSE11504	bone_marrow	human age 348 months
GSM289636	GSE11504	bone_marrow	human age 352 months
GSM289898	GSE11510	cord_blood	Cord blood, primary (2612-Re_1302UCB302)
GSM289900	GSE11510	menstruation_blood	Menstruation blood, primary (2614-Re_1687#E4)
GSM289901	GSE11510	menstruation_blood	Menstruation blood, primary (2615-Re_1689#E5)
GSM289902	GSE11510	menstruation_blood	Menstruation blood, primary (2616-Re_1691#E6)
GSM289903	GSE11510	cord_blood	Cord blood, primary (2617-Re_1759UCB408)
GSM294875	GSE11622	vagina	Age: 61;BMI: 29.22;Ethnic Origin: White
GSM294876	GSE11622	vagina	Age: 54;BMI: 30.35;Ethnic Origin: White
GSM294877	GSE11622	vagina	Age: 56;BMI: 28.9;Ethnic Origin: American Indian or Alaska Native
GSM294878	GSE11622	vagina	Age: 50;BMI: 28.07;Ethnic Origin: Black or African American
GSM294879	GSE11622	vagina	Age: 56;BMI: 31.09;Ethnic Origin: White
GSM294880	GSE11622	vagina	Age: 30;BMI: 31.2;Ethnic Origin: White
GSM294881	GSE11622	vagina	Age: 44;BMI: 25.2;Ethnic Origin: White
GSM294882	GSE11622	vagina	Age: 58;BMI: 27.45;Ethnic Origin: White
GSM294883	GSE11622	vagina	Age: 40;BMI: 37.18;Ethnic Origin: White
GSM294884	GSE11622	vagina	Age: 55;BMI: 37.34;Ethnic Origin: Black or African American
GSM294885	GSE11622	vagina	Age: 49;BMI: 24.02;Ethnic Origin: White
GSM294886	GSE11622	vagina	Age: 43;BMI: 19.09;Ethnic Origin: White
GSM294887	GSE11622	vagina	Age: 49;BMI: 29.27;Ethnic Origin: Black or African American
GSM294888	GSE11622	vagina	Age: 53;BMI: 24.72;Ethnic Origin: White
GSM294889	GSE11622	vagina	Age: 54;BMI: 29.9;Ethnic Origin: White
GSM294890	GSE11622	vagina	Age: 43;BMI: 31.66;Ethnic Origin: White
GSM294891	GSE11622	vagina	Age: 43;BMI: 28.19;Ethnic Origin: White
GSM294892	GSE11622	vagina	Age: 65;BMI: 29.27;Ethnic Origin: White
GSM294893	GSE11622	vagina	Age: 58;BMI: 23.44;Ethnic Origin: White
GSM297789	GSE11755	lymphocytes	NA
GSM297791	GSE11755	blood	NA
GSM297792	GSE11755	lymphocytes	NA
GSM297793	GSE11755	blood	NA
GSM297794	GSE11755	lymphocytes	NA
GSM297796	GSE11755	lymphocytes	NA
GSM297798	GSE11755	blood	NA
GSM298203	GSE11783	bladder	patient:10--location:healthy--R:01
GSM298204	GSE11783	bladder	patient:11--location:healthy--R:01
GSM298212	GSE11783	bladder	patient:2--location:healthy--R:01
GSM298215	GSE11783	bladder	patient:5--location:healthy--R:01
GSM298216	GSE11783	bladder	patient:7--location:healthy--R:01
GSM298217	GSE11783	bladder	patient:9--location:healthy--R:01
GSM298219	GSE11784	airway_epithelial_cells	age: 44;sex: M;ethnic group: white;smoking status: non-smoker
GSM298220	GSE11784	airway_epithelial_cells	age: 60;sex: M;ethnic group: white;smoking status: non-smoker
GSM298221	GSE11784	airway_epithelial_cells	age: 49;sex: M;ethnic group: white;smoking status: non-smoker
GSM298222	GSE11784	airway_epithelial_cells	age: 36;sex: F;ethnic group: white;smoking status: non-smoker
GSM298223	GSE11784	airway_epithelial_cells	age: 38;sex: M;ethnic group: hispanic;smoking status: non-smoker
GSM298224	GSE11784	airway_epithelial_cells	age: 73;sex: M;ethnic group: white;smoking status: non-smoker
GSM298225	GSE11784	airway_epithelial_cells	age: 49;sex: M;ethnic group: black;smoking status: non-smoker
GSM298226	GSE11784	airway_epithelial_cells	age: 22;sex: F;ethnic group: black;smoking status: non-smoker
GSM298227	GSE11784	airway_epithelial_cells	age: 29;sex: M;ethnic group: hispanic;smoking status: non-smoker
GSM298228	GSE11784	airway_epithelial_cells	age: 39;sex: F;ethnic group: asian;smoking status: non-smoker
GSM298229	GSE11784	airway_epithelial_cells	age: 48;sex: F;ethnic group: black;smoking status: non-smoker
GSM298776	GSE11831	colonic_mucosa	NA
GSM298778	GSE11831	colonic_mucosa	NA
GSM298782	GSE11831	colonic_mucosa	NA
GSM298789	GSE11831	colonic_mucosa	NA
GSM298798	GSE11831	colonic_mucosa	NA
GSM298947	GSE11831	colonic_mucosa	NA
GSM298948	GSE11831	colonic_mucosa	NA
GSM298950	GSE11831	colonic_mucosa	NA
GSM298951	GSE11831	colonic_mucosa	NA
GSM298952	GSE11831	colonic_mucosa	NA
GSM298953	GSE11831	colonic_mucosa	NA
GSM298956	GSE11831	colonic_mucosa	NA
GSM298958	GSE11831	colonic_mucosa	NA
GSM298961	GSE11831	colonic_mucosa	NA
GSM298962	GSE11831	colonic_mucosa	NA
GSM298964	GSE11831	colonic_mucosa	NA
GSM298967	GSE11831	colonic_mucosa	NA
GSM300166	GSE11882	postcentral_gyrus	Individual: 10, C;Brain region: postcentral gyrus;Gender: female;Age: 91 years
GSM300167	GSE11882	superior_frontal_gyrus	Individual: 10, C;Brain region: superior frontal gyrus;Gender: female;Age: 91 years
GSM300168	GSE11882	hippocampus	Individual: 105, C;Brain region: hippocampus;Gender: female;Age: 96 years
GSM300169	GSE11882	hippocampus	Individual: 106, C;Brain region: hippocampus;Gender: male;Age: 82 years
GSM300170	GSE11882	hippocampus	Individual: 108, C;Brain region: hippocampus;Gender: male;Age: 84 years
GSM300171	GSE11882	hippocampus	Individual: 109, C;Brain region: hippocampus;Gender: female;Age: 87 years
GSM300172	GSE11882	hippocampus	Individual: 111, C;Brain region: hippocampus;Gender: female;Age: 82 years
GSM300173	GSE11882	entorhinal_cortex	Individual: 12, AA;Brain region: entorhinal cortex;Gender: male;Age: 45 years
GSM300174	GSE11882	hippocampus	Individual: 12, AA;Brain region: hippocampus;Gender: male;Age: 45 years
GSM300175	GSE11882	postcentral_gyrus	Individual: 12, AA;Brain region: postcentral gyrus;Gender: male;Age: 45 years
GSM300176	GSE11882	superior_frontal_gyrus	Individual: 12, AA;Brain region: superior frontal gyrus;Gender: male;Age: 45 years
GSM300177	GSE11882	entorhinal_cortex	Individual: 14, C;Brain region: entorhinal cortex;Gender: male;Age: 95 years
GSM300178	GSE11882	hippocampus	Individual: 14, C;Brain region: hippocampus;Gender: male;Age: 95 years
GSM300179	GSE11882	postcentral_gyrus	Individual: 14, C;Brain region: postcentral gyrus;Gender: male;Age: 95 years
GSM300180	GSE11882	superior_frontal_gyrus	Individual: 14, C;Brain region: superior frontal gyrus;Gender: male;Age: 95 years
GSM300181	GSE11882	entorhinal_cortex	Individual: 15, C;Brain region: entorhinal cortex;Gender: male;Age: 80 years
GSM300182	GSE11882	hippocampus	Individual: 15, C;Brain region: hippocampus;Gender: male;Age: 80 years
GSM300183	GSE11882	postcentral_gyrus	Individual: 15, C;Brain region: postcentral gyrus;Gender: male;Age: 80 years
GSM300185	GSE11882	hippocampus	Individual: 16-07, C;Brain region: hippocampus;Gender: male;Age: 91 years
GSM300186	GSE11882	entorhinal_cortex	Individual: 17, C;Brain region: entorhinal cortex;Gender: female;Age: 45 years
GSM300187	GSE11882	hippocampus	Individual: 17, C;Brain region: hippocampus;Gender: female;Age: 45 years
GSM300188	GSE11882	superior_frontal_gyrus	Individual: 17, C;Brain region: superior frontal gyrus;Gender: female;Age: 45 years
GSM300189	GSE11882	entorhinal_cortex	Individual: 18, C;Brain region: entorhinal cortex;Gender: female;Age: 74 years
GSM300190	GSE11882	hippocampus	Individual: 18, C;Brain region: hippocampus;Gender: female;Age: 74 years
GSM300191	GSE11882	superior_frontal_gyrus	Individual: 18, C;Brain region: superior frontal gyrus;Gender: female;Age: 74 years
GSM300192	GSE11882	entorhinal_cortex	Individual: 2, C;Brain region: entorhinal cortex;Gender: female;Age: 99 years
GSM300193	GSE11882	hippocampus	Individual: 2, C;Brain region: hippocampus;Gender: female;Age: 99 years
GSM300194	GSE11882	postcentral_gyrus	Individual: 2, C;Brain region: postcentral gyrus;Gender: female;Age: 99 years
GSM300195	GSE11882	superior_frontal_gyrus	Individual: 2, C;Brain region: superior frontal gyrus;Gender: female;Age: 99 years
GSM300196	GSE11882	entorhinal_cortex	Individual: 21, C;Brain region: entorhinal cortex;Gender: female;Age: 74 years
GSM300197	GSE11882	hippocampus	Individual: 21, C;Brain region: hippocampus;Gender: female;Age: 74 years
GSM300198	GSE11882	postcentral_gyrus	Individual: 21, C;Brain region: postcentral gyrus;Gender: female;Age: 74 years
GSM300199	GSE11882	superior_frontal_gyrus	Individual: 21, C;Brain region: superior frontal gyrus;Gender: female;Age: 74 years
GSM300200	GSE11882	postcentral_gyrus	Individual: 26, C;Brain region: postcentral gyrus;Gender: female;Age: 92 years
GSM300201	GSE11882	superior_frontal_gyrus	Individual: 26, C;Brain region: superior frontal gyrus;Gender: female;Age: 92 years
GSM300202	GSE11882	postcentral_gyrus	Individual: 27, C;Brain region: postcentral gyrus;Gender: female;Age: 91 years
GSM300203	GSE11882	superior_frontal_gyrus	Individual: 27, C;Brain region: superior frontal gyrus;Gender: female;Age: 91 years
GSM300204	GSE11882	entorhinal_cortex	Individual: 28, C;Brain region: entorhinal cortex;Gender: male;Age: 83 years
GSM300205	GSE11882	hippocampus	Individual: 28, C;Brain region: hippocampus;Gender: male;Age: 83 years
GSM300206	GSE11882	postcentral_gyrus	Individual: 28, C;Brain region: postcentral gyrus;Gender: male;Age: 83 years
GSM300207	GSE11882	superior_frontal_gyrus	Individual: 28, C;Brain region: superior frontal gyrus;Gender: male;Age: 83 years
GSM300208	GSE11882	entorhinal_cortex	Individual: 29, C;Brain region: entorhinal cortex;Gender: male;Age: 28 years
GSM300209	GSE11882	hippocampus	Individual: 29, C;Brain region: hippocampus;Gender: male;Age: 28 years
GSM300210	GSE11882	postcentral_gyrus	Individual: 29, C;Brain region: postcentral gyrus;Gender: male;Age: 28 years
GSM300211	GSE11882	superior_frontal_gyrus	Individual: 29, C;Brain region: superior frontal gyrus;Gender: male;Age: 28 years
GSM300212	GSE11882	postcentral_gyrus	Individual: 30, C;Brain region: postcentral gyrus;Gender: female;Age: 74 years
GSM300213	GSE11882	superior_frontal_gyrus	Individual: 30, C;Brain region: superior frontal gyrus;Gender: female;Age: 74 years
GSM300214	GSE11882	entorhinal_cortex	Individual: 34, C;Brain region: entorhinal cortex;Gender: male;Age: 97 years
GSM300215	GSE11882	hippocampus	Individual: 34, C;Brain region: hippocampus;Gender: male;Age: 97 years
GSM300216	GSE11882	postcentral_gyrus	Individual: 34, C;Brain region: postcentral gyrus;Gender: male;Age: 97 years
GSM300217	GSE11882	superior_frontal_gyrus	Individual: 34, C;Brain region: superior frontal gyrus;Gender: male;Age: 97 years
GSM300218	GSE11882	entorhinal_cortex	Individual: 35, AA;Brain region: entorhinal cortex;Gender: female;Age: 34 years
GSM300219	GSE11882	hippocampus	Individual: 35, AA;Brain region: hippocampus;Gender: female;Age: 34 years
GSM300220	GSE11882	postcentral_gyrus	Individual: 35, AA;Brain region: postcentral gyrus;Gender: female;Age: 34 years
GSM300221	GSE11882	superior_frontal_gyrus	Individual: 35, AA;Brain region: superior frontal gyrus;Gender: female;Age: 34 years
GSM300222	GSE11882	entorhinal_cortex	Individual: 38, C;Brain region: entorhinal cortex;Gender: female;Age: 74 years
GSM300223	GSE11882	hippocampus	Individual: 38, C;Brain region: hippocampus;Gender: female;Age: 74 years
GSM300224	GSE11882	postcentral_gyrus	Individual: 38, C;Brain region: postcentral gyrus;Gender: female;Age: 74 years
GSM300225	GSE11882	superior_frontal_gyrus	Individual: 38, C;Brain region: superior frontal gyrus;Gender: female;Age: 74 years
GSM300226	GSE11882	postcentral_gyrus	Individual: 40, C;Brain region: postcentral gyrus;Gender: female;Age: 90 years
GSM300227	GSE11882	hippocampus	NA
GSM300228	GSE11882	entorhinal_cortex	Individual: 42, C;Brain region: entorhinal cortex;Gender: female;Age: 44 years
GSM300229	GSE11882	superior_frontal_gyrus	Individual: 42, C;Brain region: superior frontal gyrus;Gender: female;Age: 44 years
GSM300230	GSE11882	entorhinal_cortex	Individual: 45, C;Brain region: entorhinal cortex;Gender: female;Age: 37 years
GSM300231	GSE11882	hippocampus	Individual: 45, C;Brain region: hippocampus;Gender: female;Age: 37 years
GSM300232	GSE11882	postcentral_gyrus	Individual: 45, C;Brain region: postcentral gyrus;Gender: female;Age: 37 years
GSM300233	GSE11882	superior_frontal_gyrus	Individual: 45, C;Brain region: superior frontal gyrus;Gender: female;Age: 37 years
GSM300234	GSE11882	entorhinal_cortex	Individual: 46, C;Brain region: entorhinal cortex;Gender: male;Age: 85 years
GSM300235	GSE11882	hippocampus	Individual: 46, C;Brain region: hippocampus;Gender: male;Age: 85 years
GSM300236	GSE11882	postcentral_gyrus	Individual: 46, C;Brain region: postcentral gyrus;Gender: male;Age: 85 years
GSM300237	GSE11882	superior_frontal_gyrus	Individual: 46, C;Brain region: superior frontal gyrus;Gender: male;Age: 85 years
GSM300238	GSE11882	entorhinal_cortex	Individual: 47, C;Brain region: entorhinal cortex;Gender: female;Age: 70 years
GSM300239	GSE11882	hippocampus	Individual: 47, C;Brain region: hippocampus;Gender: female;Age: 70 years
GSM300240	GSE11882	postcentral_gyrus	Individual: 47, C;Brain region: postcentral gyrus;Gender: female;Age: 70 years
GSM300241	GSE11882	superior_frontal_gyrus	Individual: 47, C;Brain region: superior frontal gyrus;Gender: female;Age: 70 years
GSM300242	GSE11882	entorhinal_cortex	Individual: 52, C;Brain region: entorhinal cortex;Gender: female;Age: 64 years
GSM300243	GSE11882	hippocampus	Individual: 52, C;Brain region: hippocampus;Gender: female;Age: 64 years
GSM300244	GSE11882	postcentral_gyrus	Individual: 52, C;Brain region: postcentral gyrus;Gender: female;Age: 64 years
GSM300245	GSE11882	superior_frontal_gyrus	Individual: 52, C;Brain region: superior frontal gyrus;Gender: female;Age: 64 years
GSM300246	GSE11882	postcentral_gyrus	Individual: 53, C;Brain region: postcentral gyrus;Gender: male;Age: 70 years
GSM300247	GSE11882	superior_frontal_gyrus	Individual: 53, C;Brain region: superior frontal gyrus;Gender: male;Age: 70 years
GSM300248	GSE11882	entorhinal_cortex	Individual: 54, C;Brain region: entorhinal cortex;Gender: female;Age: 85 years
GSM300249	GSE11882	postcentral_gyrus	Individual: 54, C;Brain region: postcentral gyrus;Gender: female;Age: 85 years
GSM300250	GSE11882	superior_frontal_gyrus	Individual: 54, C;Brain region: superior frontal gyrus;Gender: female;Age: 85 years
GSM300251	GSE11882	superior_frontal_gyrus	Individual: 59, C;Brain region: superior frontal gyrus;Gender: female;Age: 91 years
GSM300252	GSE11882	entorhinal_cortex	Individual: 66, C;Brain region: entorhinal cortex;Gender: male;Age: 21 years
GSM300253	GSE11882	postcentral_gyrus	Individual: 66, C;Brain region: postcentral gyrus;Gender: male;Age: 21 years
GSM300254	GSE11882	superior_frontal_gyrus	Individual: 66, C;Brain region: superior frontal gyrus;Gender: male;Age: 21 years
GSM300255	GSE11882	hippocampus	Individual: 67, C;Brain region: hippocampus;Gender: male;Age: 69 years
GSM300256	GSE11882	postcentral_gyrus	Individual: 67, C;Brain region: postcentral gyrus;Gender: male;Age: 69 years
GSM300258	GSE11882	entorhinal_cortex	Individual: 68, C;Brain region: entorhinal cortex;Gender: male;Age: 40 years
GSM300259	GSE11882	postcentral_gyrus	Individual: 68, C;Brain region: postcentral gyrus;Gender: male;Age: 40 years
GSM300260	GSE11882	superior_frontal_gyrus	Individual: 68, C;Brain region: superior frontal gyrus;Gender: male;Age: 40 years
GSM300261	GSE11882	entorhinal_cortex	Individual: 71, C;Brain region: entorhinal cortex;Gender: male;Age: 52 years
GSM300262	GSE11882	hippocampus	Individual: 71, C;Brain region: hippocampus;Gender: male;Age: 52 years
GSM300263	GSE11882	postcentral_gyrus	Individual: 71, C;Brain region: postcentral gyrus;Gender: male;Age: 52 years
GSM300264	GSE11882	superior_frontal_gyrus	Individual: 71, C;Brain region: superior frontal gyrus;Gender: male;Age: 52 years
GSM300265	GSE11882	postcentral_gyrus	Individual: 72, C;Brain region: postcentral gyrus;Gender: male;Age: 75 years
GSM300266	GSE11882	superior_frontal_gyrus	Individual: 72, C;Brain region: superior frontal gyrus;Gender: male;Age: 75 years
GSM300267	GSE11882	entorhinal_cortex	Individual: 73, C;Brain region: entorhinal cortex;Gender: male;Age: 86 years
GSM300268	GSE11882	hippocampus	Individual: 73, C;Brain region: hippocampus;Gender: male;Age: 86 years
GSM300269	GSE11882	postcentral_gyrus	Individual: 73, C;Brain region: postcentral gyrus;Gender: male;Age: 86 years
GSM300270	GSE11882	superior_frontal_gyrus	Individual: 73, C;Brain region: superior frontal gyrus;Gender: male;Age: 86 years
GSM300271	GSE11882	entorhinal_cortex	Individual: 76, C;Brain region: entorhinal cortex;Gender: female;Age: 26 years
GSM300272	GSE11882	hippocampus	Individual: 76, C;Brain region: hippocampus;Gender: female;Age: 26 years
GSM300273	GSE11882	postcentral_gyrus	Individual: 76, C;Brain region: postcentral gyrus;Gender: female;Age: 26 years
GSM300274	GSE11882	superior_frontal_gyrus	Individual: 76, C;Brain region: superior frontal gyrus;Gender: female;Age: 26 years
GSM300275	GSE11882	entorhinal_cortex	Individual: 77, C;Brain region: entorhinal cortex;Gender: male;Age: 20 years
GSM300276	GSE11882	hippocampus	Individual: 77, C;Brain region: hippocampus;Gender: male;Age: 20 years
GSM300277	GSE11882	postcentral_gyrus	Individual: 77, C;Brain region: postcentral gyrus;Gender: male;Age: 20 years
GSM300278	GSE11882	superior_frontal_gyrus	Individual: 77, C;Brain region: superior frontal gyrus;Gender: male;Age: 20 years
GSM300279	GSE11882	entorhinal_cortex	Individual: 78, C;Brain region: entorhinal cortex;Gender: male;Age: 20 years
GSM300280	GSE11882	hippocampus	Individual: 78, C;Brain region: hippocampus;Gender: male;Age: 20 years
GSM300281	GSE11882	postcentral_gyrus	Individual: 78, C;Brain region: postcentral gyrus;Gender: male;Age: 20 years
GSM300282	GSE11882	superior_frontal_gyrus	Individual: 78, C;Brain region: superior frontal gyrus;Gender: male;Age: 20 years
GSM300283	GSE11882	postcentral_gyrus	Individual: 79, AA;Brain region: postcentral gyrus;Gender: female;Age: 36 years
GSM300284	GSE11882	superior_frontal_gyrus	Individual: 79, AA;Brain region: superior frontal gyrus;Gender: female;Age: 36 years
GSM300285	GSE11882	entorhinal_cortex	Individual: 8, C;Brain region: entorhinal cortex;Gender: male;Age: 69 years
GSM300286	GSE11882	hippocampus	Individual: 8, C;Brain region: hippocampus;Gender: male;Age: 69 years
GSM300287	GSE11882	postcentral_gyrus	Individual: 8, C;Brain region: postcentral gyrus;Gender: male;Age: 69 years
GSM300288	GSE11882	superior_frontal_gyrus	Individual: 8, C;Brain region: superior frontal gyrus;Gender: male;Age: 69 years
GSM300289	GSE11882	entorhinal_cortex	Individual: 80, AA;Brain region: entorhinal cortex;Gender: female;Age: 44 years
GSM300290	GSE11882	hippocampus	Individual: 80, AA;Brain region: hippocampus;Gender: female;Age: 44 years
GSM300291	GSE11882	postcentral_gyrus	Individual: 80, AA;Brain region: postcentral gyrus;Gender: female;Age: 44 years
GSM300292	GSE11882	superior_frontal_gyrus	Individual: 80, AA;Brain region: superior frontal gyrus;Gender: female;Age: 44 years
GSM300293	GSE11882	entorhinal_cortex	Individual: 81, AA;Brain region: entorhinal cortex;Gender: female;Age: 48 years
GSM300294	GSE11882	hippocampus	Individual: 81, AA;Brain region: hippocampus;Gender: female;Age: 48 years
GSM300295	GSE11882	postcentral_gyrus	Individual: 81, AA;Brain region: postcentral gyrus;Gender: female;Age: 48 years
GSM300296	GSE11882	superior_frontal_gyrus	Individual: 81, AA;Brain region: superior frontal gyrus;Gender: female;Age: 48 years
GSM300297	GSE11882	entorhinal_cortex	Individual: 82, AA;Brain region: entorhinal cortex;Gender: female;Age: 30 years
GSM300298	GSE11882	hippocampus	Individual: 82, AA;Brain region: hippocampus;Gender: female;Age: 30 years
GSM300299	GSE11882	superior_frontal_gyrus	Individual: 82, AA;Brain region: superior frontal gyrus;Gender: female;Age: 30 years
GSM300300	GSE11882	entorhinal_cortex	Individual: 83, C;Brain region: entorhinal cortex;Gender: male;Age: 20 years
GSM300301	GSE11882	hippocampus	Individual: 83, C;Brain region: hippocampus;Gender: male;Age: 20 years
GSM300302	GSE11882	postcentral_gyrus	Individual: 83, C;Brain region: postcentral gyrus;Gender: male;Age: 20 years
GSM300303	GSE11882	superior_frontal_gyrus	Individual: 83, C;Brain region: superior frontal gyrus;Gender: male;Age: 20 years
GSM300304	GSE11882	entorhinal_cortex	Individual: 84, AA;Brain region: entorhinal cortex;Gender: male;Age: 33 years
GSM300305	GSE11882	hippocampus	Individual: 84, AA;Brain region: hippocampus;Gender: male;Age: 33 years
GSM300306	GSE11882	postcentral_gyrus	Individual: 84, AA;Brain region: postcentral gyrus;Gender: male;Age: 33 years
GSM300307	GSE11882	superior_frontal_gyrus	Individual: 84, AA;Brain region: superior frontal gyrus;Gender: male;Age: 33 years
GSM300308	GSE11882	entorhinal_cortex	Individual: 85, C;Brain region: entorhinal cortex;Gender: male;Age: 22 years
GSM300309	GSE11882	hippocampus	Individual: 85, C;Brain region: hippocampus;Gender: male;Age: 22 years
GSM300310	GSE11882	postcentral_gyrus	Individual: 85, C;Brain region: postcentral gyrus;Gender: male;Age: 22 years
GSM300311	GSE11882	superior_frontal_gyrus	Individual: 85, C;Brain region: superior frontal gyrus;Gender: male;Age: 22 years
GSM300312	GSE11882	entorhinal_cortex	Individual: 86, AA;Brain region: entorhinal cortex;Gender: male;Age: 42 years
GSM300313	GSE11882	hippocampus	Individual: 86, AA;Brain region: hippocampus;Gender: male;Age: 42 years
GSM300314	GSE11882	postcentral_gyrus	Individual: 86, AA;Brain region: postcentral gyrus;Gender: male;Age: 42 years
GSM300315	GSE11882	superior_frontal_gyrus	Individual: 86, AA;Brain region: superior frontal gyrus;Gender: male;Age: 42 years
GSM300316	GSE11882	entorhinal_cortex	Individual: 87, C;Brain region: entorhinal cortex;Gender: male;Age: 45 years
GSM300317	GSE11882	hippocampus	Individual: 87, C;Brain region: hippocampus;Gender: male;Age: 45 years
GSM300318	GSE11882	postcentral_gyrus	Individual: 87, C;Brain region: postcentral gyrus;Gender: male;Age: 45 years
GSM300319	GSE11882	superior_frontal_gyrus	Individual: 87, C;Brain region: superior frontal gyrus;Gender: male;Age: 45 years
GSM300320	GSE11882	entorhinal_cortex	Individual: 88, AA;Brain region: entorhinal cortex;Gender: female;Age: 47 years
GSM300321	GSE11882	hippocampus	Individual: 88, AA;Brain region: hippocampus;Gender: female;Age: 47 years
GSM300322	GSE11882	postcentral_gyrus	Individual: 88, AA;Brain region: postcentral gyrus;Gender: female;Age: 47 years
GSM300323	GSE11882	superior_frontal_gyrus	Individual: 88, AA;Brain region: superior frontal gyrus;Gender: female;Age: 47 years
GSM300324	GSE11882	entorhinal_cortex	Individual: 93, C;Brain region: entorhinal cortex;Gender: male;Age: 69 years
GSM300325	GSE11882	hippocampus	Individual: 93, C;Brain region: hippocampus;Gender: male;Age: 69 years
GSM300326	GSE11882	postcentral_gyrus	Individual: 93, C;Brain region: postcentral gyrus;Gender: male;Age: 69 years
GSM300327	GSE11882	superior_frontal_gyrus	Individual: 93, C;Brain region: superior frontal gyrus;Gender: male;Age: 69 years
GSM300328	GSE11882	entorhinal_cortex	Individual: 94, C;Brain region: entorhinal cortex;Gender: female;Age: 91 years
GSM300329	GSE11882	hippocampus	Individual: 94, C;Brain region: hippocampus;Gender: female;Age: 91 years
GSM300330	GSE11882	postcentral_gyrus	Individual: 94, C;Brain region: postcentral gyrus;Gender: female;Age: 91 years
GSM300331	GSE11882	superior_frontal_gyrus	Individual: 94, C;Brain region: superior frontal gyrus;Gender: female;Age: 91 years
GSM300332	GSE11882	entorhinal_cortex	Individual: 96, C;Brain region: entorhinal cortex;Gender: male;Age: 75 years
GSM300333	GSE11882	hippocampus	Individual: 96, C;Brain region: hippocampus;Gender: male;Age: 75 years
GSM300335	GSE11882	superior_frontal_gyrus	Individual: 96, C;Brain region: superior frontal gyrus;Gender: male;Age: 75 years
GSM300338	GSE11882	entorhinal_cortex	Individual: 98, C;Brain region: entorhinal cortex;Gender: female;Age: 82 years
GSM300339	GSE11882	hippocampus	Individual: 98, C;Brain region: hippocampus;Gender: female;Age: 82 years
GSM300340	GSE11882	postcentral_gyrus	Individual: 98, C;Brain region: postcentral gyrus;Gender: female;Age: 82 years
GSM300341	GSE11882	superior_frontal_gyrus	Individual: 98, C;Brain region: superior frontal gyrus;Gender: female;Age: 82 years
GSM300859	GSE11784	airway_epithelial_cells	age: 62;sex: F;ethnic group: white;smoking status: non-smoker
GSM300860	GSE11906	airway_epithelial_cells	Age: 35;Sex: M;Ethnic group: white;Smoking status: non-smoker
GSM300881	GSE11906	trachea	age: 35;sex: M;ethnic group: black;smoking status: non-smoker
GSM300882	GSE11906	trachea	age: 35;sex: M;ethnic group: black;smoking status: non-smoker
GSM300883	GSE11906	trachea	age: 49;sex: M;ethnic group: white;smoking status: non-smoker
GSM300884	GSE11906	trachea	age: 38;sex: M;ethnic group: black;smoking status: non-smoker
GSM300885	GSE11906	trachea	age: 38;sex: M;ethnic group: hispanic;smoking status: non-smoker
GSM300886	GSE11906	trachea	age: 46;sex: M;ethnic group: white;smoking status: non-smoker
GSM300887	GSE11906	trachea	age: 49;sex: F;ethnic group: black;smoking status: non-smoker
GSM300888	GSE11906	trachea	age: 34;sex: M;ethnic group: black;smoking status: non-smoker
GSM300889	GSE11906	trachea	age: 45;sex: F;ethnic group: hispanic;smoking status: non-smoker
GSM300890	GSE11906	trachea	age: 44;sex: M;ethnic group: white;smoking status: non-smoker
GSM300891	GSE11906	trachea	Age: 39;Sex: F;Ethnic group: hispanic;Smoking status: non-smoker
GSM300892	GSE11906	trachea	Age: 60;Sex: M;Ethnic group: white;Smoking status: non-smoker
GSM300893	GSE11906	trachea	age: 49;sex: M;ethnic group: white;smoking status: non-smoker
GSM300894	GSE11906	trachea	age: 36;sex: F;ethnic group: white;smoking status: non-smoker
GSM300895	GSE11906	trachea	age: 38;sex: M;ethnic group: hispanic;smoking status: non-smoker
GSM300896	GSE11906	trachea	age: 35;sex: M;ethnic group: black;smoking status: non-smoker
GSM300897	GSE11906	trachea	age: 39;sex: M;ethnic group: black;smoking status: non-smoker
GSM301134	GSE11917	coronary_smooth_muscle_cells	NA
GSM301167	GSE11917	coronary_smooth_muscle_cells	NA
GSM301204	GSE11917	coronary_smooth_muscle_cells	NA
GSM302396	GSE11784	airway_epithelial_cells	age: 47;sex: M;ethnic group: white;smoking status: non-smoker
GSM302397	GSE11784	airway_epithelial_cells	age: 39;sex: M;ethnic group: black;smoking status: non-smoker
GSM304263	GSE12034	10_tissue_mixture	NA
GSM304264	GSE12034	10_tissue_mixture	NA
GSM304265	GSE12034	10_tissue_mixture	NA
GSM309986	GSE12345	pleural_tissue	NA
GSM309987	GSE12345	pleural_tissue	NA
GSM309988	GSE12345	pleural_tissue	NA
GSM309989	GSE12345	pleural_tissue	NA
GSM312896	GSE12452	nasopharyngeal_epithelial_cells	normal;Biopsy Negative Control
GSM312897	GSE12452	nasopharyngeal_epithelial_cells	normal;Biopsy Negative Control
GSM312898	GSE12452	nasopharyngeal_epithelial_cells	normal;Biopsy Negative Control
GSM312899	GSE12452	nasopharyngeal_epithelial_cells	normal;Biopsy Negative Control
GSM312900	GSE12452	nasopharyngeal_epithelial_cells	normal;Adjacent pair of T18
GSM312901	GSE12452	nasopharyngeal_epithelial_cells	normal;Adjacent pair of T20
GSM312902	GSE12452	nasopharyngeal_epithelial_cells	normal;Adjacent pair of T7
GSM312903	GSE12452	nasopharyngeal_epithelial_cells	normal;Adjacent pair of T10
GSM312904	GSE12452	nasopharyngeal_epithelial_cells	normal
GSM312905	GSE12452	nasopharyngeal_epithelial_cells	normal
GSM313315	GSE12474	skeletal_muscle	Subject 1; two months before the beginning of heating experiment
GSM313316	GSE12474	skeletal_muscle	Subject 2; two months before the beginning of heating experiment
GSM313317	GSE12474	skeletal_muscle	Subject 4; two months before the beginning of heating experiment
GSM313318	GSE12474	skeletal_muscle	Subject 5; two months before the beginning of heating experiment
GSM313324	GSE12474	skeletal_muscle	Subject 3; two months before the beginning of heating experiment
GSM315617	GSE12583	foreskin_fibroblast	NA
GSM315618	GSE12583	foreskin_fibroblast	NA
GSM315855	GSE12606	kidney	12 kidneys pooled
GSM315856	GSE12606	kidney	Gender: male;Date of birth: 03/02/1942
GSM315859	GSE12606	kidney	Gender: male;Date of birth: 26/06/1936
GSM315862	GSE12606	kidney	Gender: male;Date of birth: 08/04/1952
GSM315989	GSE12621	retinamacula_biopsy	Gestational age: 19-20 weeks' gestation;Tissue: retina
GSM315990	GSE12621	retinamacula_biopsy	Gestational age: 19-20 weeks' gestation;Tissue: retina
GSM315991	GSE12621	retinamacula_biopsy	Gestational age: 19-20 weeks' gestation;Tissue: retina
GSM315992	GSE12621	retinamacula_biopsy	Gestational age: 19-20 weeks' gestation;Tissue: retina
GSM315993	GSE12621	retinanasal_biopsy	Gestational age: 19-20 weeks' gestation;Tissue: retina
GSM315994	GSE12621	retinanasal_biopsy	Gestational age: 19-20 weeks' gestation;Tissue: retina
GSM315995	GSE12621	retinanasal_biopsy	Gestational age: 19-20 weeks' gestation;Tissue: retina
GSM315996	GSE12621	retinanasal_biopsy	Gestational age: 19-20 weeks' gestation;Tissue: retina
GSM315997	GSE12621	retinasurround_biopsy	Gestational age: 19-20 weeks' gestation;Tissue: retina
GSM315998	GSE12621	retinasurround_biopsy	Gestational age: 19-20 weeks' gestation;Tissue: retina
GSM315999	GSE12621	retinasurround_biopsy	Gestational age: 19-20 weeks' gestation;Tissue: retina
GSM316000	GSE12621	retinasurround_biopsy	Gestational age: 19-20 weeks' gestation;Tissue: retina
GSM317342	GSE12644	aortic_valve	Gender: male;age: 65
GSM317343	GSE12644	aortic_valve	Gender: male;age: 73
GSM317344	GSE12644	aortic_valve	Gender: male;age: 62
GSM317345	GSE12644	aortic_valve	Gender: male;age: 59
GSM317346	GSE12644	aortic_valve	Gender: male;age: 58
GSM318840	GSE11882	superior_frontal_gyrus	Individual: 63, C;Brain region: superior frontal gyrus;Gender: male;Age: 66 years
GSM320282	GSE12767	placenta	Caucasian, normal karyotypes
GSM320285	GSE12767	placenta	Caucasian, normal karyotypes
GSM320286	GSE12767	placenta	Caucasian, normal karyotypes
GSM320287	GSE12767	placenta	Caucasian, normal karyotypes
GSM320289	GSE12767	placenta	Caucasian, normal karyotypes
GSM320290	GSE12767	placenta	Caucasian, normal karyotypes
GSM320291	GSE12767	placenta	Caucasian, normal karyotypes
GSM320293	GSE12767	placenta	Caucasian, normal karyotypes
GSM321967	GSE12814	myometrium	NA
GSM321970	GSE12814	myometrium	NA
GSM321973	GSE12814	myometrium	NA
GSM321976	GSE12814	myometrium	NA
GSM321977	GSE12814	myometrium	NA
GSM321980	GSE12814	myometrium	NA
GSM321983	GSE12814	myometrium	NA
GSM321986	GSE12814	myometrium	NA
GSM321989	GSE12814	myometrium	NA
GSM321992	GSE12814	myometrium	NA
GSM321997	GSE12814	myometrium	NA
GSM324070	GSE12917	mammary_epithelial_cells	NA
GSM324071	GSE12917	mammary_epithelial_cells	NA
GSM324072	GSE12917	mammary_epithelial_cells	NA
GSM329338	GSE13155	placenta	NA
GSM329339	GSE13155	placenta	NA
GSM333449	GSE13205	vastus_lateralis	Gender:male, Age:70yrs
GSM333450	GSE13205	vastus_lateralis	Gender:male, Age:76yrs
GSM333451	GSE13205	vastus_lateralis	Gender:male, Age:76yrs
GSM333452	GSE13205	vastus_lateralis	Gender:female, Age:72yrs
GSM333453	GSE13205	vastus_lateralis	Gender:male, Age:60yrs
GSM333454	GSE13205	vastus_lateralis	Gender:male, Age:76yrs
GSM333455	GSE13205	vastus_lateralis	Gender:male, Age:71yrs
GSM333456	GSE13205	vastus_lateralis	Gender:male, Age:70yrs
GSM336252	GSE13319	myometrium	NA
GSM336253	GSE13319	myometrium	NA
GSM336254	GSE13319	myometrium	NA
GSM336255	GSE13319	myometrium	NA
GSM336256	GSE13319	myometrium	NA
GSM336257	GSE13319	myometrium	NA
GSM336258	GSE13319	myometrium	NA
GSM336259	GSE13319	myometrium	NA
GSM336260	GSE13319	myometrium	NA
GSM336261	GSE13319	myometrium	NA
GSM336262	GSE13319	myometrium	NA
GSM336263	GSE13319	myometrium	NA
GSM336264	GSE13319	myometrium	NA
GSM336265	GSE13319	myometrium	NA
GSM336266	GSE13319	myometrium	NA
GSM336267	GSE13319	myometrium	NA
GSM336268	GSE13319	myometrium	NA
GSM336269	GSE13319	myometrium	NA
GSM336270	GSE13319	myometrium	NA
GSM336271	GSE13319	myometrium	NA
GSM336272	GSE13319	myometrium	NA
GSM336273	GSE13319	myometrium	NA
GSM336274	GSE13319	myometrium	NA
GSM336275	GSE13319	myometrium	NA
GSM336276	GSE13319	myometrium	NA
GSM336277	GSE13319	myometrium	NA
GSM336278	GSE13319	myometrium	NA
GSM337197	GSE13355	skin	NA
GSM337198	GSE13355	skin	NA
GSM337199	GSE13355	skin	NA
GSM337200	GSE13355	skin	NA
GSM337201	GSE13355	skin	NA
GSM337202	GSE13355	skin	NA
GSM337203	GSE13355	skin	NA
GSM337204	GSE13355	skin	NA
GSM337205	GSE13355	skin	NA
GSM337206	GSE13355	skin	NA
GSM337207	GSE13355	skin	NA
GSM337208	GSE13355	skin	NA
GSM337209	GSE13355	skin	NA
GSM337210	GSE13355	skin	NA
GSM337211	GSE13355	skin	NA
GSM337212	GSE13355	skin	NA
GSM337213	GSE13355	skin	NA
GSM337214	GSE13355	skin	NA
GSM337215	GSE13355	skin	NA
GSM337216	GSE13355	skin	NA
GSM337217	GSE13355	skin	NA
GSM337218	GSE13355	skin	NA
GSM337219	GSE13355	skin	NA
GSM337220	GSE13355	skin	NA
GSM337221	GSE13355	skin	NA
GSM337222	GSE13355	skin	NA
GSM337223	GSE13355	skin	NA
GSM337224	GSE13355	skin	NA
GSM337225	GSE13355	skin	NA
[truncated: 2,532 more rows]
