# Supplementary material for: The Pathway Coexpression Network: Revealing pathway relationships
Source: PLoS Comput Biol. 2018 Mar 19;14(3):e1006042. doi: 10.1371/journal.pcbi.1006042 (PMC5875878; doi:10.1371/journal.pcbi.1006042)
Supplement: S2 Table — (XLSX) [file pcbi.1006042.s005.xlsx]

## Sheet: cp_v5_1_barcode.csv
Pathway	Gene
KEGG_GLYCOLYSIS_GLUCONEOGENESIS	55902
KEGG_GLYCOLYSIS_GLUCONEOGENESIS	2645
KEGG_GLYCOLYSIS_GLUCONEOGENESIS	5232
KEGG_GLYCOLYSIS_GLUCONEOGENESIS	5230
KEGG_GLYCOLYSIS_GLUCONEOGENESIS	5162
KEGG_GLYCOLYSIS_GLUCONEOGENESIS	5160
KEGG_GLYCOLYSIS_GLUCONEOGENESIS	5161
KEGG_GLYCOLYSIS_GLUCONEOGENESIS	55276
KEGG_GLYCOLYSIS_GLUCONEOGENESIS	7167
KEGG_GLYCOLYSIS_GLUCONEOGENESIS	84532
KEGG_GLYCOLYSIS_GLUCONEOGENESIS	2203
KEGG_GLYCOLYSIS_GLUCONEOGENESIS	125
KEGG_GLYCOLYSIS_GLUCONEOGENESIS	3099
KEGG_GLYCOLYSIS_GLUCONEOGENESIS	126
KEGG_GLYCOLYSIS_GLUCONEOGENESIS	3098
KEGG_GLYCOLYSIS_GLUCONEOGENESIS	3101
KEGG_GLYCOLYSIS_GLUCONEOGENESIS	127
KEGG_GLYCOLYSIS_GLUCONEOGENESIS	5224
KEGG_GLYCOLYSIS_GLUCONEOGENESIS	128
KEGG_GLYCOLYSIS_GLUCONEOGENESIS	5223
KEGG_GLYCOLYSIS_GLUCONEOGENESIS	124
KEGG_GLYCOLYSIS_GLUCONEOGENESIS	230
KEGG_GLYCOLYSIS_GLUCONEOGENESIS	501
KEGG_GLYCOLYSIS_GLUCONEOGENESIS	92483
KEGG_GLYCOLYSIS_GLUCONEOGENESIS	5313
KEGG_GLYCOLYSIS_GLUCONEOGENESIS	160287
KEGG_GLYCOLYSIS_GLUCONEOGENESIS	2023
KEGG_GLYCOLYSIS_GLUCONEOGENESIS	5315
KEGG_GLYCOLYSIS_GLUCONEOGENESIS	5214
KEGG_GLYCOLYSIS_GLUCONEOGENESIS	669
KEGG_GLYCOLYSIS_GLUCONEOGENESIS	5106
KEGG_GLYCOLYSIS_GLUCONEOGENESIS	5105
KEGG_GLYCOLYSIS_GLUCONEOGENESIS	219
KEGG_GLYCOLYSIS_GLUCONEOGENESIS	217
KEGG_GLYCOLYSIS_GLUCONEOGENESIS	218
KEGG_GLYCOLYSIS_GLUCONEOGENESIS	10327
KEGG_GLYCOLYSIS_GLUCONEOGENESIS	8789
KEGG_GLYCOLYSIS_GLUCONEOGENESIS	5213
KEGG_GLYCOLYSIS_GLUCONEOGENESIS	5211
KEGG_GLYCOLYSIS_GLUCONEOGENESIS	3948
KEGG_GLYCOLYSIS_GLUCONEOGENESIS	2597
KEGG_GLYCOLYSIS_GLUCONEOGENESIS	2027
KEGG_GLYCOLYSIS_GLUCONEOGENESIS	2026
KEGG_GLYCOLYSIS_GLUCONEOGENESIS	131
KEGG_GLYCOLYSIS_GLUCONEOGENESIS	130
KEGG_GLYCOLYSIS_GLUCONEOGENESIS	3945
KEGG_GLYCOLYSIS_GLUCONEOGENESIS	220
KEGG_GLYCOLYSIS_GLUCONEOGENESIS	221
KEGG_GLYCOLYSIS_GLUCONEOGENESIS	222
KEGG_GLYCOLYSIS_GLUCONEOGENESIS	223
KEGG_GLYCOLYSIS_GLUCONEOGENESIS	224
KEGG_GLYCOLYSIS_GLUCONEOGENESIS	130589
KEGG_GLYCOLYSIS_GLUCONEOGENESIS	226
KEGG_GLYCOLYSIS_GLUCONEOGENESIS	1738
KEGG_GLYCOLYSIS_GLUCONEOGENESIS	1737
KEGG_GLYCOLYSIS_GLUCONEOGENESIS	229
KEGG_GLYCOLYSIS_GLUCONEOGENESIS	57818
KEGG_GLYCOLYSIS_GLUCONEOGENESIS	3939
KEGG_GLYCOLYSIS_GLUCONEOGENESIS	2538
KEGG_GLYCOLYSIS_GLUCONEOGENESIS	5236
KEGG_GLYCOLYSIS_GLUCONEOGENESIS	2821
KEGG_CITRATE_CYCLE_TCA_CYCLE	3420
KEGG_CITRATE_CYCLE_TCA_CYCLE	1743
KEGG_CITRATE_CYCLE_TCA_CYCLE	5106
KEGG_CITRATE_CYCLE_TCA_CYCLE	1431
KEGG_CITRATE_CYCLE_TCA_CYCLE	5162
KEGG_CITRATE_CYCLE_TCA_CYCLE	5105
KEGG_CITRATE_CYCLE_TCA_CYCLE	5160
KEGG_CITRATE_CYCLE_TCA_CYCLE	5161
KEGG_CITRATE_CYCLE_TCA_CYCLE	2271
KEGG_CITRATE_CYCLE_TCA_CYCLE	6392
KEGG_CITRATE_CYCLE_TCA_CYCLE	4967
KEGG_CITRATE_CYCLE_TCA_CYCLE	6390
KEGG_CITRATE_CYCLE_TCA_CYCLE	3419
KEGG_CITRATE_CYCLE_TCA_CYCLE	6391
KEGG_CITRATE_CYCLE_TCA_CYCLE	3418
KEGG_CITRATE_CYCLE_TCA_CYCLE	3417
KEGG_CITRATE_CYCLE_TCA_CYCLE	48
KEGG_CITRATE_CYCLE_TCA_CYCLE	47
KEGG_CITRATE_CYCLE_TCA_CYCLE	4191
KEGG_CITRATE_CYCLE_TCA_CYCLE	1738
KEGG_CITRATE_CYCLE_TCA_CYCLE	4190
KEGG_CITRATE_CYCLE_TCA_CYCLE	1737
KEGG_CITRATE_CYCLE_TCA_CYCLE	55753
KEGG_CITRATE_CYCLE_TCA_CYCLE	5091
KEGG_CITRATE_CYCLE_TCA_CYCLE	6389
KEGG_CITRATE_CYCLE_TCA_CYCLE	8802
KEGG_CITRATE_CYCLE_TCA_CYCLE	8803
KEGG_CITRATE_CYCLE_TCA_CYCLE	8801
KEGG_CITRATE_CYCLE_TCA_CYCLE	3421
KEGG_CITRATE_CYCLE_TCA_CYCLE	50
KEGG_PENTOSE_PHOSPHATE_PATHWAY	6120
KEGG_PENTOSE_PHOSPHATE_PATHWAY	22934
KEGG_PENTOSE_PHOSPHATE_PATHWAY	55276
KEGG_PENTOSE_PHOSPHATE_PATHWAY	25796
KEGG_PENTOSE_PHOSPHATE_PATHWAY	5634
KEGG_PENTOSE_PHOSPHATE_PATHWAY	8789
KEGG_PENTOSE_PHOSPHATE_PATHWAY	5213
KEGG_PENTOSE_PHOSPHATE_PATHWAY	5211
KEGG_PENTOSE_PHOSPHATE_PATHWAY	6888
KEGG_PENTOSE_PHOSPHATE_PATHWAY	7086
KEGG_PENTOSE_PHOSPHATE_PATHWAY	2203
KEGG_PENTOSE_PHOSPHATE_PATHWAY	84076
KEGG_PENTOSE_PHOSPHATE_PATHWAY	5226
KEGG_PENTOSE_PHOSPHATE_PATHWAY	64080
KEGG_PENTOSE_PHOSPHATE_PATHWAY	226
KEGG_PENTOSE_PHOSPHATE_PATHWAY	230
KEGG_PENTOSE_PHOSPHATE_PATHWAY	229
KEGG_PENTOSE_PHOSPHATE_PATHWAY	9563
KEGG_PENTOSE_PHOSPHATE_PATHWAY	221823
KEGG_PENTOSE_PHOSPHATE_PATHWAY	5631
KEGG_PENTOSE_PHOSPHATE_PATHWAY	51071
KEGG_PENTOSE_PHOSPHATE_PATHWAY	2539
KEGG_PENTOSE_PHOSPHATE_PATHWAY	5236
KEGG_PENTOSE_PHOSPHATE_PATHWAY	8277
KEGG_PENTOSE_PHOSPHATE_PATHWAY	5214
KEGG_PENTOSE_PHOSPHATE_PATHWAY	2821
KEGG_PENTOSE_AND_GLUCURONATE_INTERCONVERSIONS	54576
KEGG_PENTOSE_AND_GLUCURONATE_INTERCONVERSIONS	6120
KEGG_PENTOSE_AND_GLUCURONATE_INTERCONVERSIONS	54578
KEGG_PENTOSE_AND_GLUCURONATE_INTERCONVERSIONS	54490
KEGG_PENTOSE_AND_GLUCURONATE_INTERCONVERSIONS	51084
KEGG_PENTOSE_AND_GLUCURONATE_INTERCONVERSIONS	7358
KEGG_PENTOSE_AND_GLUCURONATE_INTERCONVERSIONS	10941
KEGG_PENTOSE_AND_GLUCURONATE_INTERCONVERSIONS	2990
KEGG_PENTOSE_AND_GLUCURONATE_INTERCONVERSIONS	54600
KEGG_PENTOSE_AND_GLUCURONATE_INTERCONVERSIONS	51181
KEGG_PENTOSE_AND_GLUCURONATE_INTERCONVERSIONS	27294
KEGG_PENTOSE_AND_GLUCURONATE_INTERCONVERSIONS	7360
KEGG_PENTOSE_AND_GLUCURONATE_INTERCONVERSIONS	9942
KEGG_PENTOSE_AND_GLUCURONATE_INTERCONVERSIONS	231
KEGG_PENTOSE_AND_GLUCURONATE_INTERCONVERSIONS	7363
KEGG_PENTOSE_AND_GLUCURONATE_INTERCONVERSIONS	79799
KEGG_PENTOSE_AND_GLUCURONATE_INTERCONVERSIONS	7367
KEGG_PENTOSE_AND_GLUCURONATE_INTERCONVERSIONS	54658
KEGG_PENTOSE_AND_GLUCURONATE_INTERCONVERSIONS	54659
KEGG_PENTOSE_AND_GLUCURONATE_INTERCONVERSIONS	7366
KEGG_FRUCTOSE_AND_MANNOSE_METABOLISM	4351
KEGG_FRUCTOSE_AND_MANNOSE_METABOLISM	5373
KEGG_FRUCTOSE_AND_MANNOSE_METABOLISM	5372
KEGG_FRUCTOSE_AND_MANNOSE_METABOLISM	8789
KEGG_FRUCTOSE_AND_MANNOSE_METABOLISM	5213
KEGG_FRUCTOSE_AND_MANNOSE_METABOLISM	2762
KEGG_FRUCTOSE_AND_MANNOSE_METABOLISM	5210
KEGG_FRUCTOSE_AND_MANNOSE_METABOLISM	5211
KEGG_FRUCTOSE_AND_MANNOSE_METABOLISM	9107
KEGG_FRUCTOSE_AND_MANNOSE_METABOLISM	7167
KEGG_FRUCTOSE_AND_MANNOSE_METABOLISM	29085
KEGG_FRUCTOSE_AND_MANNOSE_METABOLISM	5209
KEGG_FRUCTOSE_AND_MANNOSE_METABOLISM	197258
KEGG_FRUCTOSE_AND_MANNOSE_METABOLISM	5208
KEGG_FRUCTOSE_AND_MANNOSE_METABOLISM	8776
KEGG_FRUCTOSE_AND_MANNOSE_METABOLISM	5207
KEGG_FRUCTOSE_AND_MANNOSE_METABOLISM	57016
KEGG_FRUCTOSE_AND_MANNOSE_METABOLISM	8790
KEGG_FRUCTOSE_AND_MANNOSE_METABOLISM	3795
KEGG_FRUCTOSE_AND_MANNOSE_METABOLISM	2203
KEGG_FRUCTOSE_AND_MANNOSE_METABOLISM	8898
KEGG_FRUCTOSE_AND_MANNOSE_METABOLISM	3099
KEGG_FRUCTOSE_AND_MANNOSE_METABOLISM	3101
KEGG_FRUCTOSE_AND_MANNOSE_METABOLISM	3098
KEGG_FRUCTOSE_AND_MANNOSE_METABOLISM	226
KEGG_FRUCTOSE_AND_MANNOSE_METABOLISM	230
KEGG_FRUCTOSE_AND_MANNOSE_METABOLISM	229
KEGG_FRUCTOSE_AND_MANNOSE_METABOLISM	9108
KEGG_FRUCTOSE_AND_MANNOSE_METABOLISM	7264
KEGG_FRUCTOSE_AND_MANNOSE_METABOLISM	231
KEGG_FRUCTOSE_AND_MANNOSE_METABOLISM	6652
KEGG_FRUCTOSE_AND_MANNOSE_METABOLISM	29926
KEGG_FRUCTOSE_AND_MANNOSE_METABOLISM	5214
KEGG_FRUCTOSE_AND_MANNOSE_METABOLISM	29925
KEGG_GALACTOSE_METABOLISM	2645
KEGG_GALACTOSE_METABOLISM	2584
KEGG_GALACTOSE_METABOLISM	2720
KEGG_GALACTOSE_METABOLISM	2582
KEGG_GALACTOSE_METABOLISM	2683
KEGG_GALACTOSE_METABOLISM	55276
KEGG_GALACTOSE_METABOLISM	3906
KEGG_GALACTOSE_METABOLISM	5213
KEGG_GALACTOSE_METABOLISM	5211
KEGG_GALACTOSE_METABOLISM	8972
KEGG_GALACTOSE_METABOLISM	3099
KEGG_GALACTOSE_METABOLISM	3098
KEGG_GALACTOSE_METABOLISM	3101
KEGG_GALACTOSE_METABOLISM	2592
KEGG_GALACTOSE_METABOLISM	57818
KEGG_GALACTOSE_METABOLISM	2717
KEGG_GALACTOSE_METABOLISM	2595
KEGG_GALACTOSE_METABOLISM	3938
KEGG_GALACTOSE_METABOLISM	2585
KEGG_GALACTOSE_METABOLISM	2538
KEGG_GALACTOSE_METABOLISM	7360
KEGG_GALACTOSE_METABOLISM	5236
KEGG_GALACTOSE_METABOLISM	231
KEGG_GALACTOSE_METABOLISM	8704
KEGG_GALACTOSE_METABOLISM	2548
KEGG_GALACTOSE_METABOLISM	5214
KEGG_ASCORBATE_AND_ALDARATE_METABOLISM	54576
KEGG_ASCORBATE_AND_ALDARATE_METABOLISM	54578
KEGG_ASCORBATE_AND_ALDARATE_METABOLISM	219
KEGG_ASCORBATE_AND_ALDARATE_METABOLISM	54490
KEGG_ASCORBATE_AND_ALDARATE_METABOLISM	217
KEGG_ASCORBATE_AND_ALDARATE_METABOLISM	55586
KEGG_ASCORBATE_AND_ALDARATE_METABOLISM	7358
KEGG_ASCORBATE_AND_ALDARATE_METABOLISM	10941
KEGG_ASCORBATE_AND_ALDARATE_METABOLISM	223
KEGG_ASCORBATE_AND_ALDARATE_METABOLISM	224
KEGG_ASCORBATE_AND_ALDARATE_METABOLISM	54600
KEGG_ASCORBATE_AND_ALDARATE_METABOLISM	501
KEGG_ASCORBATE_AND_ALDARATE_METABOLISM	7363
KEGG_ASCORBATE_AND_ALDARATE_METABOLISM	79799
KEGG_ASCORBATE_AND_ALDARATE_METABOLISM	54658
KEGG_ASCORBATE_AND_ALDARATE_METABOLISM	7367
KEGG_ASCORBATE_AND_ALDARATE_METABOLISM	54659
KEGG_ASCORBATE_AND_ALDARATE_METABOLISM	7366
KEGG_FATTY_ACID_METABOLISM	1374
KEGG_FATTY_ACID_METABOLISM	126129
KEGG_FATTY_ACID_METABOLISM	35
KEGG_FATTY_ACID_METABOLISM	219
KEGG_FATTY_ACID_METABOLISM	36
KEGG_FATTY_ACID_METABOLISM	33
KEGG_FATTY_ACID_METABOLISM	217
KEGG_FATTY_ACID_METABOLISM	34
KEGG_FATTY_ACID_METABOLISM	1579
KEGG_FATTY_ACID_METABOLISM	39
KEGG_FATTY_ACID_METABOLISM	37
KEGG_FATTY_ACID_METABOLISM	38
KEGG_FATTY_ACID_METABOLISM	10449
KEGG_FATTY_ACID_METABOLISM	3033
KEGG_FATTY_ACID_METABOLISM	3032
KEGG_FATTY_ACID_METABOLISM	3030
KEGG_FATTY_ACID_METABOLISM	284541
KEGG_FATTY_ACID_METABOLISM	131
KEGG_FATTY_ACID_METABOLISM	130
KEGG_FATTY_ACID_METABOLISM	23305
KEGG_FATTY_ACID_METABOLISM	125
KEGG_FATTY_ACID_METABOLISM	126
KEGG_FATTY_ACID_METABOLISM	127
KEGG_FATTY_ACID_METABOLISM	1892
KEGG_FATTY_ACID_METABOLISM	128
KEGG_FATTY_ACID_METABOLISM	223
KEGG_FATTY_ACID_METABOLISM	224
KEGG_FATTY_ACID_METABOLISM	51703
KEGG_FATTY_ACID_METABOLISM	124
KEGG_FATTY_ACID_METABOLISM	1962
KEGG_FATTY_ACID_METABOLISM	2639
KEGG_FATTY_ACID_METABOLISM	501
KEGG_FATTY_ACID_METABOLISM	8310
KEGG_FATTY_ACID_METABOLISM	2180
KEGG_FATTY_ACID_METABOLISM	30
KEGG_FATTY_ACID_METABOLISM	1376
KEGG_FATTY_ACID_METABOLISM	1375
KEGG_FATTY_ACID_METABOLISM	51
KEGG_FATTY_ACID_METABOLISM	10455
KEGG_FATTY_ACID_METABOLISM	1632
KEGG_FATTY_ACID_METABOLISM	2181
KEGG_FATTY_ACID_METABOLISM	2182
KEGG_STEROID_BIOSYNTHESIS	6646
KEGG_STEROID_BIOSYNTHESIS	4047
KEGG_STEROID_BIOSYNTHESIS	6713
KEGG_STEROID_BIOSYNTHESIS	10682
KEGG_STEROID_BIOSYNTHESIS	1595
KEGG_STEROID_BIOSYNTHESIS	1717
KEGG_STEROID_BIOSYNTHESIS	1594
KEGG_STEROID_BIOSYNTHESIS	1718
KEGG_STEROID_BIOSYNTHESIS	51478
KEGG_STEROID_BIOSYNTHESIS	6307
KEGG_STEROID_BIOSYNTHESIS	2222
KEGG_STEROID_BIOSYNTHESIS	6309
KEGG_STEROID_BIOSYNTHESIS	3988
KEGG_STEROID_BIOSYNTHESIS	1056
KEGG_STEROID_BIOSYNTHESIS	7108
KEGG_STEROID_BIOSYNTHESIS	50814
KEGG_STEROID_BIOSYNTHESIS	8435
KEGG_PRIMARY_BILE_ACID_BIOSYNTHESIS	10858
KEGG_PRIMARY_BILE_ACID_BIOSYNTHESIS	10998
KEGG_PRIMARY_BILE_ACID_BIOSYNTHESIS	570
KEGG_PRIMARY_BILE_ACID_BIOSYNTHESIS	9420
KEGG_PRIMARY_BILE_ACID_BIOSYNTHESIS	1109
KEGG_PRIMARY_BILE_ACID_BIOSYNTHESIS	3295
KEGG_PRIMARY_BILE_ACID_BIOSYNTHESIS	6342
KEGG_PRIMARY_BILE_ACID_BIOSYNTHESIS	6718
KEGG_PRIMARY_BILE_ACID_BIOSYNTHESIS	8309
KEGG_PRIMARY_BILE_ACID_BIOSYNTHESIS	80270
KEGG_PRIMARY_BILE_ACID_BIOSYNTHESIS	1593
KEGG_PRIMARY_BILE_ACID_BIOSYNTHESIS	23600
KEGG_PRIMARY_BILE_ACID_BIOSYNTHESIS	1581
KEGG_PRIMARY_BILE_ACID_BIOSYNTHESIS	1582
KEGG_PRIMARY_BILE_ACID_BIOSYNTHESIS	51302
KEGG_PRIMARY_BILE_ACID_BIOSYNTHESIS	9023
KEGG_STEROID_HORMONE_BIOSYNTHESIS	79644
KEGG_STEROID_HORMONE_BIOSYNTHESIS	1109
KEGG_STEROID_HORMONE_BIOSYNTHESIS	1577
KEGG_STEROID_HORMONE_BIOSYNTHESIS	3284
KEGG_STEROID_HORMONE_BIOSYNTHESIS	54490
KEGG_STEROID_HORMONE_BIOSYNTHESIS	3283
KEGG_STEROID_HORMONE_BIOSYNTHESIS	1312
KEGG_STEROID_HORMONE_BIOSYNTHESIS	6820
KEGG_STEROID_HORMONE_BIOSYNTHESIS	1576
KEGG_STEROID_HORMONE_BIOSYNTHESIS	1581
KEGG_STEROID_HORMONE_BIOSYNTHESIS	1583
KEGG_STEROID_HORMONE_BIOSYNTHESIS	8644
KEGG_STEROID_HORMONE_BIOSYNTHESIS	3291
KEGG_STEROID_HORMONE_BIOSYNTHESIS	6783
KEGG_STEROID_HORMONE_BIOSYNTHESIS	3290
KEGG_STEROID_HORMONE_BIOSYNTHESIS	3294
KEGG_STEROID_HORMONE_BIOSYNTHESIS	3293
KEGG_STEROID_HORMONE_BIOSYNTHESIS	1589
KEGG_STEROID_HORMONE_BIOSYNTHESIS	3292
KEGG_STEROID_HORMONE_BIOSYNTHESIS	1588
KEGG_STEROID_HORMONE_BIOSYNTHESIS	1586
KEGG_STEROID_HORMONE_BIOSYNTHESIS	1585
KEGG_STEROID_HORMONE_BIOSYNTHESIS	1584
KEGG_STEROID_HORMONE_BIOSYNTHESIS	8630
KEGG_STEROID_HORMONE_BIOSYNTHESIS	51478
KEGG_STEROID_HORMONE_BIOSYNTHESIS	79799
KEGG_STEROID_HORMONE_BIOSYNTHESIS	1551
KEGG_STEROID_HORMONE_BIOSYNTHESIS	54658
KEGG_STEROID_HORMONE_BIOSYNTHESIS	54659
KEGG_STEROID_HORMONE_BIOSYNTHESIS	54576
KEGG_STEROID_HORMONE_BIOSYNTHESIS	54578
KEGG_STEROID_HORMONE_BIOSYNTHESIS	7923
KEGG_STEROID_HORMONE_BIOSYNTHESIS	1646
KEGG_STEROID_HORMONE_BIOSYNTHESIS	1645
KEGG_STEROID_HORMONE_BIOSYNTHESIS	1543
KEGG_STEROID_HORMONE_BIOSYNTHESIS	1545
KEGG_STEROID_HORMONE_BIOSYNTHESIS	412
KEGG_STEROID_HORMONE_BIOSYNTHESIS	10941
KEGG_STEROID_HORMONE_BIOSYNTHESIS	6716
KEGG_STEROID_HORMONE_BIOSYNTHESIS	6715
KEGG_STEROID_HORMONE_BIOSYNTHESIS	64816
KEGG_STEROID_HORMONE_BIOSYNTHESIS	9420
KEGG_STEROID_HORMONE_BIOSYNTHESIS	54600
KEGG_STEROID_HORMONE_BIOSYNTHESIS	6718
KEGG_STEROID_HORMONE_BIOSYNTHESIS	51144
KEGG_STEROID_HORMONE_BIOSYNTHESIS	7363
KEGG_STEROID_HORMONE_BIOSYNTHESIS	7367
KEGG_STEROID_HORMONE_BIOSYNTHESIS	7366
KEGG_OXIDATIVE_PHOSPHORYLATION	9550
KEGG_OXIDATIVE_PHOSPHORYLATION	29796
KEGG_OXIDATIVE_PHOSPHORYLATION	4698
KEGG_OXIDATIVE_PHOSPHORYLATION	4697
KEGG_OXIDATIVE_PHOSPHORYLATION	27068
KEGG_OXIDATIVE_PHOSPHORYLATION	9551
KEGG_OXIDATIVE_PHOSPHORYLATION	374291
KEGG_OXIDATIVE_PHOSPHORYLATION	535
KEGG_OXIDATIVE_PHOSPHORYLATION	534
KEGG_OXIDATIVE_PHOSPHORYLATION	533
KEGG_OXIDATIVE_PHOSPHORYLATION	539
KEGG_OXIDATIVE_PHOSPHORYLATION	4513
KEGG_OXIDATIVE_PHOSPHORYLATION	4512
KEGG_OXIDATIVE_PHOSPHORYLATION	537
KEGG_OXIDATIVE_PHOSPHORYLATION	341947
KEGG_OXIDATIVE_PHOSPHORYLATION	4514
KEGG_OXIDATIVE_PHOSPHORYLATION	1329
KEGG_OXIDATIVE_PHOSPHORYLATION	1327
KEGG_OXIDATIVE_PHOSPHORYLATION	50617
KEGG_OXIDATIVE_PHOSPHORYLATION	479
KEGG_OXIDATIVE_PHOSPHORYLATION	4508
KEGG_OXIDATIVE_PHOSPHORYLATION	10476
KEGG_OXIDATIVE_PHOSPHORYLATION	4695
KEGG_OXIDATIVE_PHOSPHORYLATION	4696
KEGG_OXIDATIVE_PHOSPHORYLATION	4694
KEGG_OXIDATIVE_PHOSPHORYLATION	27089
KEGG_OXIDATIVE_PHOSPHORYLATION	51606
KEGG_OXIDATIVE_PHOSPHORYLATION	513
KEGG_OXIDATIVE_PHOSPHORYLATION	64077
KEGG_OXIDATIVE_PHOSPHORYLATION	245972
KEGG_OXIDATIVE_PHOSPHORYLATION	9167
KEGG_OXIDATIVE_PHOSPHORYLATION	518
KEGG_OXIDATIVE_PHOSPHORYLATION	245973
KEGG_OXIDATIVE_PHOSPHORYLATION	517
KEGG_OXIDATIVE_PHOSPHORYLATION	516
KEGG_OXIDATIVE_PHOSPHORYLATION	515
KEGG_OXIDATIVE_PHOSPHORYLATION	514
KEGG_OXIDATIVE_PHOSPHORYLATION	9377
KEGG_OXIDATIVE_PHOSPHORYLATION	10312
KEGG_OXIDATIVE_PHOSPHORYLATION	496
KEGG_OXIDATIVE_PHOSPHORYLATION	51382
KEGG_OXIDATIVE_PHOSPHORYLATION	495
KEGG_OXIDATIVE_PHOSPHORYLATION	498
KEGG_OXIDATIVE_PHOSPHORYLATION	522
KEGG_OXIDATIVE_PHOSPHORYLATION	521
KEGG_OXIDATIVE_PHOSPHORYLATION	6389
KEGG_OXIDATIVE_PHOSPHORYLATION	523
KEGG_OXIDATIVE_PHOSPHORYLATION	529
KEGG_OXIDATIVE_PHOSPHORYLATION	56901
KEGG_OXIDATIVE_PHOSPHORYLATION	526
KEGG_OXIDATIVE_PHOSPHORYLATION	525
KEGG_OXIDATIVE_PHOSPHORYLATION	528
KEGG_OXIDATIVE_PHOSPHORYLATION	527
KEGG_OXIDATIVE_PHOSPHORYLATION	1352
KEGG_OXIDATIVE_PHOSPHORYLATION	1351
KEGG_OXIDATIVE_PHOSPHORYLATION	1350
KEGG_OXIDATIVE_PHOSPHORYLATION	6392
KEGG_OXIDATIVE_PHOSPHORYLATION	6390
KEGG_OXIDATIVE_PHOSPHORYLATION	6391
KEGG_OXIDATIVE_PHOSPHORYLATION	127124
KEGG_OXIDATIVE_PHOSPHORYLATION	1349
KEGG_OXIDATIVE_PHOSPHORYLATION	1346
KEGG_OXIDATIVE_PHOSPHORYLATION	1347
KEGG_OXIDATIVE_PHOSPHORYLATION	1345
KEGG_OXIDATIVE_PHOSPHORYLATION	10063
KEGG_OXIDATIVE_PHOSPHORYLATION	506
KEGG_OXIDATIVE_PHOSPHORYLATION	1340
KEGG_OXIDATIVE_PHOSPHORYLATION	509
KEGG_OXIDATIVE_PHOSPHORYLATION	9296
KEGG_OXIDATIVE_PHOSPHORYLATION	170712
KEGG_OXIDATIVE_PHOSPHORYLATION	23545
KEGG_OXIDATIVE_PHOSPHORYLATION	7381
KEGG_OXIDATIVE_PHOSPHORYLATION	9114
KEGG_OXIDATIVE_PHOSPHORYLATION	1339
KEGG_OXIDATIVE_PHOSPHORYLATION	1337
KEGG_OXIDATIVE_PHOSPHORYLATION	7388
KEGG_OXIDATIVE_PHOSPHORYLATION	7386
KEGG_OXIDATIVE_PHOSPHORYLATION	7385
KEGG_OXIDATIVE_PHOSPHORYLATION	7384
KEGG_OXIDATIVE_PHOSPHORYLATION	4709
KEGG_OXIDATIVE_PHOSPHORYLATION	4707
KEGG_OXIDATIVE_PHOSPHORYLATION	4708
KEGG_OXIDATIVE_PHOSPHORYLATION	4705
KEGG_OXIDATIVE_PHOSPHORYLATION	4706
KEGG_OXIDATIVE_PHOSPHORYLATION	155066
KEGG_OXIDATIVE_PHOSPHORYLATION	4541
KEGG_OXIDATIVE_PHOSPHORYLATION	4704
KEGG_OXIDATIVE_PHOSPHORYLATION	4701
KEGG_OXIDATIVE_PHOSPHORYLATION	4702
KEGG_OXIDATIVE_PHOSPHORYLATION	10975
KEGG_OXIDATIVE_PHOSPHORYLATION	4700
KEGG_OXIDATIVE_PHOSPHORYLATION	4731
KEGG_OXIDATIVE_PHOSPHORYLATION	90423
KEGG_OXIDATIVE_PHOSPHORYLATION	4538
KEGG_OXIDATIVE_PHOSPHORYLATION	4536
KEGG_OXIDATIVE_PHOSPHORYLATION	125965
KEGG_OXIDATIVE_PHOSPHORYLATION	5464
KEGG_OXIDATIVE_PHOSPHORYLATION	84701
KEGG_OXIDATIVE_PHOSPHORYLATION	10632
KEGG_OXIDATIVE_PHOSPHORYLATION	8992
KEGG_OXIDATIVE_PHOSPHORYLATION	126328
KEGG_OXIDATIVE_PHOSPHORYLATION	4716
KEGG_OXIDATIVE_PHOSPHORYLATION	4728
KEGG_OXIDATIVE_PHOSPHORYLATION	4717
KEGG_OXIDATIVE_PHOSPHORYLATION	4718
KEGG_OXIDATIVE_PHOSPHORYLATION	4719
KEGG_OXIDATIVE_PHOSPHORYLATION	4729
KEGG_OXIDATIVE_PHOSPHORYLATION	4712
KEGG_OXIDATIVE_PHOSPHORYLATION	4724
KEGG_OXIDATIVE_PHOSPHORYLATION	4713
KEGG_OXIDATIVE_PHOSPHORYLATION	4723
KEGG_OXIDATIVE_PHOSPHORYLATION	4714
KEGG_OXIDATIVE_PHOSPHORYLATION	4726
KEGG_OXIDATIVE_PHOSPHORYLATION	4715
KEGG_OXIDATIVE_PHOSPHORYLATION	4725
KEGG_OXIDATIVE_PHOSPHORYLATION	4720
KEGG_OXIDATIVE_PHOSPHORYLATION	4710
KEGG_OXIDATIVE_PHOSPHORYLATION	4722
KEGG_OXIDATIVE_PHOSPHORYLATION	4711
KEGG_OXIDATIVE_PHOSPHORYLATION	1537
KEGG_OXIDATIVE_PHOSPHORYLATION	1353
KEGG_OXIDATIVE_PHOSPHORYLATION	1355
KEGG_PURINE_METABOLISM	5436
KEGG_PURINE_METABOLISM	22978
KEGG_PURINE_METABOLISM	5437
KEGG_PURINE_METABOLISM	5169
KEGG_PURINE_METABOLISM	5434
KEGG_PURINE_METABOLISM	5435
KEGG_PURINE_METABOLISM	5167
KEGG_PURINE_METABOLISM	7498
KEGG_PURINE_METABOLISM	5438
KEGG_PURINE_METABOLISM	5439
KEGG_PURINE_METABOLISM	54107
KEGG_PURINE_METABOLISM	159
KEGG_PURINE_METABOLISM	5634
KEGG_PURINE_METABOLISM	158
KEGG_PURINE_METABOLISM	10201
KEGG_PURINE_METABOLISM	51082
KEGG_PURINE_METABOLISM	87178
KEGG_PURINE_METABOLISM	5440
KEGG_PURINE_METABOLISM	50940
KEGG_PURINE_METABOLISM	10714
KEGG_PURINE_METABOLISM	5441
KEGG_PURINE_METABOLISM	203
KEGG_PURINE_METABOLISM	204
KEGG_PURINE_METABOLISM	205
KEGG_PURINE_METABOLISM	23649
KEGG_PURINE_METABOLISM	124583
KEGG_PURINE_METABOLISM	270
KEGG_PURINE_METABOLISM	272
KEGG_PURINE_METABOLISM	271
KEGG_PURINE_METABOLISM	4833
KEGG_PURINE_METABOLISM	3000
KEGG_PURINE_METABOLISM	4830
KEGG_PURINE_METABOLISM	471
KEGG_PURINE_METABOLISM	4831
KEGG_PURINE_METABOLISM	1716
KEGG_PURINE_METABOLISM	10623
KEGG_PURINE_METABOLISM	4832
KEGG_PURINE_METABOLISM	10622
KEGG_PURINE_METABOLISM	10621
KEGG_PURINE_METABOLISM	58497
KEGG_PURINE_METABOLISM	56985
KEGG_PURINE_METABOLISM	5142
KEGG_PURINE_METABOLISM	5143
KEGG_PURINE_METABOLISM	5140
KEGG_PURINE_METABOLISM	5141
KEGG_PURINE_METABOLISM	318
KEGG_PURINE_METABOLISM	51292
KEGG_PURINE_METABOLISM	5146
KEGG_PURINE_METABOLISM	5147
KEGG_PURINE_METABOLISM	5144
KEGG_PURINE_METABOLISM	5145
KEGG_PURINE_METABOLISM	5557
KEGG_PURINE_METABOLISM	5558
KEGG_PURINE_METABOLISM	26289
KEGG_PURINE_METABOLISM	2766
KEGG_PURINE_METABOLISM	8382
KEGG_PURINE_METABOLISM	27115
KEGG_PURINE_METABOLISM	8654
KEGG_PURINE_METABOLISM	57804
KEGG_PURINE_METABOLISM	2977
KEGG_PURINE_METABOLISM	2272
KEGG_PURINE_METABOLISM	109
KEGG_PURINE_METABOLISM	108
KEGG_PURINE_METABOLISM	107
KEGG_PURINE_METABOLISM	5422
KEGG_PURINE_METABOLISM	5139
KEGG_PURINE_METABOLISM	5138
KEGG_PURINE_METABOLISM	5137
KEGG_PURINE_METABOLISM	122622
KEGG_PURINE_METABOLISM	100
KEGG_PURINE_METABOLISM	5427
KEGG_PURINE_METABOLISM	5151
KEGG_PURINE_METABOLISM	5152
KEGG_PURINE_METABOLISM	5153
KEGG_PURINE_METABOLISM	53343
KEGG_PURINE_METABOLISM	5424
KEGG_PURINE_METABOLISM	9615
KEGG_PURINE_METABOLISM	5425
KEGG_PURINE_METABOLISM	5426
KEGG_PURINE_METABOLISM	5158
KEGG_PURINE_METABOLISM	5150
KEGG_PURINE_METABOLISM	5631
KEGG_PURINE_METABOLISM	64425
KEGG_PURINE_METABOLISM	10606
KEGG_PURINE_METABOLISM	84618
KEGG_PURINE_METABOLISM	5431
KEGG_PURINE_METABOLISM	11128
KEGG_PURINE_METABOLISM	5149
KEGG_PURINE_METABOLISM	5430
KEGG_PURINE_METABOLISM	5148
KEGG_PURINE_METABOLISM	5433
KEGG_PURINE_METABOLISM	1633
KEGG_PURINE_METABOLISM	5432
KEGG_PURINE_METABOLISM	114
KEGG_PURINE_METABOLISM	115
KEGG_PURINE_METABOLISM	112
KEGG_PURINE_METABOLISM	122481
KEGG_PURINE_METABOLISM	113
KEGG_PURINE_METABOLISM	111
KEGG_PURINE_METABOLISM	8833
KEGG_PURINE_METABOLISM	55811
KEGG_PURINE_METABOLISM	51728
KEGG_PURINE_METABOLISM	84172
KEGG_PURINE_METABOLISM	4860
KEGG_PURINE_METABOLISM	50484
KEGG_PURINE_METABOLISM	5136
KEGG_PURINE_METABOLISM	3251
KEGG_PURINE_METABOLISM	2618
KEGG_PURINE_METABOLISM	9061
KEGG_PURINE_METABOLISM	9060
KEGG_PURINE_METABOLISM	56953
KEGG_PURINE_METABOLISM	196883
KEGG_PURINE_METABOLISM	3614
KEGG_PURINE_METABOLISM	3615
KEGG_PURINE_METABOLISM	171568
KEGG_PURINE_METABOLISM	548644
KEGG_PURINE_METABOLISM	25885
KEGG_PURINE_METABOLISM	55703
KEGG_PURINE_METABOLISM	2983
KEGG_PURINE_METABOLISM	5313
KEGG_PURINE_METABOLISM	2984
KEGG_PURINE_METABOLISM	9583
KEGG_PURINE_METABOLISM	5315
KEGG_PURINE_METABOLISM	2982
KEGG_PURINE_METABOLISM	2987
KEGG_PURINE_METABOLISM	2986
KEGG_PURINE_METABOLISM	132
KEGG_PURINE_METABOLISM	3704
KEGG_PURINE_METABOLISM	9533
KEGG_PURINE_METABOLISM	56655
KEGG_PURINE_METABOLISM	6240
KEGG_PURINE_METABOLISM	661
KEGG_PURINE_METABOLISM	6241
KEGG_PURINE_METABOLISM	51251
KEGG_PURINE_METABOLISM	8622
KEGG_PURINE_METABOLISM	84265
KEGG_PURINE_METABOLISM	4907
KEGG_PURINE_METABOLISM	4882
KEGG_PURINE_METABOLISM	4881
KEGG_PURINE_METABOLISM	10846
KEGG_PURINE_METABOLISM	955
KEGG_PURINE_METABOLISM	954
KEGG_PURINE_METABOLISM	957
KEGG_PURINE_METABOLISM	956
KEGG_PURINE_METABOLISM	11164
KEGG_PURINE_METABOLISM	953
KEGG_PURINE_METABOLISM	5198
KEGG_PURINE_METABOLISM	93034
KEGG_PURINE_METABOLISM	353
KEGG_PURINE_METABOLISM	221823
KEGG_PURINE_METABOLISM	5471
KEGG_PURINE_METABOLISM	29922
KEGG_PURINE_METABOLISM	30833
KEGG_PURINE_METABOLISM	55821
KEGG_PURINE_METABOLISM	30834
KEGG_PYRIMIDINE_METABOLISM	22978
KEGG_PYRIMIDINE_METABOLISM	5436
KEGG_PYRIMIDINE_METABOLISM	5437
KEGG_PYRIMIDINE_METABOLISM	5434
KEGG_PYRIMIDINE_METABOLISM	5435
KEGG_PYRIMIDINE_METABOLISM	5438
KEGG_PYRIMIDINE_METABOLISM	5439
KEGG_PYRIMIDINE_METABOLISM	54107
KEGG_PYRIMIDINE_METABOLISM	7298
KEGG_PYRIMIDINE_METABOLISM	7296
KEGG_PYRIMIDINE_METABOLISM	10201
KEGG_PYRIMIDINE_METABOLISM	51082
KEGG_PYRIMIDINE_METABOLISM	87178
KEGG_PYRIMIDINE_METABOLISM	5440
KEGG_PYRIMIDINE_METABOLISM	1723
KEGG_PYRIMIDINE_METABOLISM	10714
KEGG_PYRIMIDINE_METABOLISM	5441
KEGG_PYRIMIDINE_METABOLISM	23649
KEGG_PYRIMIDINE_METABOLISM	139596
KEGG_PYRIMIDINE_METABOLISM	124583
KEGG_PYRIMIDINE_METABOLISM	4833
KEGG_PYRIMIDINE_METABOLISM	4830
KEGG_PYRIMIDINE_METABOLISM	4831
KEGG_PYRIMIDINE_METABOLISM	4832
KEGG_PYRIMIDINE_METABOLISM	10623
KEGG_PYRIMIDINE_METABOLISM	10622
KEGG_PYRIMIDINE_METABOLISM	10621
KEGG_PYRIMIDINE_METABOLISM	318
KEGG_PYRIMIDINE_METABOLISM	5557
KEGG_PYRIMIDINE_METABOLISM	5558
KEGG_PYRIMIDINE_METABOLISM	8382
KEGG_PYRIMIDINE_METABOLISM	57804
KEGG_PYRIMIDINE_METABOLISM	1841
KEGG_PYRIMIDINE_METABOLISM	1503
KEGG_PYRIMIDINE_METABOLISM	5422
KEGG_PYRIMIDINE_METABOLISM	5427
KEGG_PYRIMIDINE_METABOLISM	5424
KEGG_PYRIMIDINE_METABOLISM	5425
KEGG_PYRIMIDINE_METABOLISM	5426
KEGG_PYRIMIDINE_METABOLISM	790
KEGG_PYRIMIDINE_METABOLISM	129607
KEGG_PYRIMIDINE_METABOLISM	64425
KEGG_PYRIMIDINE_METABOLISM	84618
KEGG_PYRIMIDINE_METABOLISM	11128
KEGG_PYRIMIDINE_METABOLISM	1635
KEGG_PYRIMIDINE_METABOLISM	5431
KEGG_PYRIMIDINE_METABOLISM	5430
KEGG_PYRIMIDINE_METABOLISM	1633
KEGG_PYRIMIDINE_METABOLISM	5433
KEGG_PYRIMIDINE_METABOLISM	5432
KEGG_PYRIMIDINE_METABOLISM	83549
KEGG_PYRIMIDINE_METABOLISM	51733
KEGG_PYRIMIDINE_METABOLISM	10587
KEGG_PYRIMIDINE_METABOLISM	51727
KEGG_PYRIMIDINE_METABOLISM	51728
KEGG_PYRIMIDINE_METABOLISM	50484
KEGG_PYRIMIDINE_METABOLISM	4860
KEGG_PYRIMIDINE_METABOLISM	84172
KEGG_PYRIMIDINE_METABOLISM	151531
KEGG_PYRIMIDINE_METABOLISM	56474
KEGG_PYRIMIDINE_METABOLISM	978
KEGG_PYRIMIDINE_METABOLISM	56953
KEGG_PYRIMIDINE_METABOLISM	1854
KEGG_PYRIMIDINE_METABOLISM	171568
KEGG_PYRIMIDINE_METABOLISM	54963
KEGG_PYRIMIDINE_METABOLISM	548644
KEGG_PYRIMIDINE_METABOLISM	25885
KEGG_PYRIMIDINE_METABOLISM	55703
KEGG_PYRIMIDINE_METABOLISM	9583
KEGG_PYRIMIDINE_METABOLISM	3704
KEGG_PYRIMIDINE_METABOLISM	9533
KEGG_PYRIMIDINE_METABOLISM	56655
KEGG_PYRIMIDINE_METABOLISM	6240
KEGG_PYRIMIDINE_METABOLISM	6241
KEGG_PYRIMIDINE_METABOLISM	661
KEGG_PYRIMIDINE_METABOLISM	51251
KEGG_PYRIMIDINE_METABOLISM	1807
KEGG_PYRIMIDINE_METABOLISM	1806
KEGG_PYRIMIDINE_METABOLISM	1890
KEGG_PYRIMIDINE_METABOLISM	7372
KEGG_PYRIMIDINE_METABOLISM	7371
KEGG_PYRIMIDINE_METABOLISM	84265
KEGG_PYRIMIDINE_METABOLISM	7083
KEGG_PYRIMIDINE_METABOLISM	4907
KEGG_PYRIMIDINE_METABOLISM	7084
KEGG_PYRIMIDINE_METABOLISM	7378
KEGG_PYRIMIDINE_METABOLISM	955
KEGG_PYRIMIDINE_METABOLISM	957
KEGG_PYRIMIDINE_METABOLISM	956
KEGG_PYRIMIDINE_METABOLISM	953
KEGG_PYRIMIDINE_METABOLISM	93034
KEGG_PYRIMIDINE_METABOLISM	30833
KEGG_PYRIMIDINE_METABOLISM	29922
KEGG_PYRIMIDINE_METABOLISM	50808
KEGG_PYRIMIDINE_METABOLISM	30834
KEGG_ALANINE_ASPARTATE_AND_GLUTAMATE_METABOLISM	2747
KEGG_ALANINE_ASPARTATE_AND_GLUTAMATE_METABOLISM	9945
KEGG_ALANINE_ASPARTATE_AND_GLUTAMATE_METABOLISM	64902
KEGG_ALANINE_ASPARTATE_AND_GLUTAMATE_METABOLISM	1373
KEGG_ALANINE_ASPARTATE_AND_GLUTAMATE_METABOLISM	27165
KEGG_ALANINE_ASPARTATE_AND_GLUTAMATE_METABOLISM	18
KEGG_ALANINE_ASPARTATE_AND_GLUTAMATE_METABOLISM	159
KEGG_ALANINE_ASPARTATE_AND_GLUTAMATE_METABOLISM	158
KEGG_ALANINE_ASPARTATE_AND_GLUTAMATE_METABOLISM	2746
KEGG_ALANINE_ASPARTATE_AND_GLUTAMATE_METABOLISM	2744
KEGG_ALANINE_ASPARTATE_AND_GLUTAMATE_METABOLISM	435
KEGG_ALANINE_ASPARTATE_AND_GLUTAMATE_METABOLISM	259307
KEGG_ALANINE_ASPARTATE_AND_GLUTAMATE_METABOLISM	2875
KEGG_ALANINE_ASPARTATE_AND_GLUTAMATE_METABOLISM	2673
KEGG_ALANINE_ASPARTATE_AND_GLUTAMATE_METABOLISM	84706
KEGG_ALANINE_ASPARTATE_AND_GLUTAMATE_METABOLISM	8528
KEGG_ALANINE_ASPARTATE_AND_GLUTAMATE_METABOLISM	122622
KEGG_ALANINE_ASPARTATE_AND_GLUTAMATE_METABOLISM	91703
KEGG_ALANINE_ASPARTATE_AND_GLUTAMATE_METABOLISM	2571
KEGG_ALANINE_ASPARTATE_AND_GLUTAMATE_METABOLISM	2572
KEGG_ALANINE_ASPARTATE_AND_GLUTAMATE_METABOLISM	2806
KEGG_ALANINE_ASPARTATE_AND_GLUTAMATE_METABOLISM	189
KEGG_ALANINE_ASPARTATE_AND_GLUTAMATE_METABOLISM	2752
KEGG_ALANINE_ASPARTATE_AND_GLUTAMATE_METABOLISM	56954
KEGG_ALANINE_ASPARTATE_AND_GLUTAMATE_METABOLISM	2805
KEGG_ALANINE_ASPARTATE_AND_GLUTAMATE_METABOLISM	8659
KEGG_ALANINE_ASPARTATE_AND_GLUTAMATE_METABOLISM	790
KEGG_ALANINE_ASPARTATE_AND_GLUTAMATE_METABOLISM	7915
KEGG_ALANINE_ASPARTATE_AND_GLUTAMATE_METABOLISM	445
KEGG_ALANINE_ASPARTATE_AND_GLUTAMATE_METABOLISM	440
KEGG_ALANINE_ASPARTATE_AND_GLUTAMATE_METABOLISM	5471
KEGG_ALANINE_ASPARTATE_AND_GLUTAMATE_METABOLISM	443
KEGG_GLYCINE_SERINE_AND_THREONINE_METABOLISM	211
KEGG_GLYCINE_SERINE_AND_THREONINE_METABOLISM	212
KEGG_GLYCINE_SERINE_AND_THREONINE_METABOLISM	132158
KEGG_GLYCINE_SERINE_AND_THREONINE_METABOLISM	4129
KEGG_GLYCINE_SERINE_AND_THREONINE_METABOLISM	64902
KEGG_GLYCINE_SERINE_AND_THREONINE_METABOLISM	4128
KEGG_GLYCINE_SERINE_AND_THREONINE_METABOLISM	314
KEGG_GLYCINE_SERINE_AND_THREONINE_METABOLISM	2628
KEGG_GLYCINE_SERINE_AND_THREONINE_METABOLISM	10993
KEGG_GLYCINE_SERINE_AND_THREONINE_METABOLISM	8639
KEGG_GLYCINE_SERINE_AND_THREONINE_METABOLISM	27232
KEGG_GLYCINE_SERINE_AND_THREONINE_METABOLISM	6470
KEGG_GLYCINE_SERINE_AND_THREONINE_METABOLISM	23464
KEGG_GLYCINE_SERINE_AND_THREONINE_METABOLISM	26227
KEGG_GLYCINE_SERINE_AND_THREONINE_METABOLISM	29958
KEGG_GLYCINE_SERINE_AND_THREONINE_METABOLISM	6472
KEGG_GLYCINE_SERINE_AND_THREONINE_METABOLISM	63826
KEGG_GLYCINE_SERINE_AND_THREONINE_METABOLISM	29968
KEGG_GLYCINE_SERINE_AND_THREONINE_METABOLISM	635
KEGG_GLYCINE_SERINE_AND_THREONINE_METABOLISM	2731
KEGG_GLYCINE_SERINE_AND_THREONINE_METABOLISM	1738
KEGG_GLYCINE_SERINE_AND_THREONINE_METABOLISM	2593
KEGG_GLYCINE_SERINE_AND_THREONINE_METABOLISM	5723
KEGG_GLYCINE_SERINE_AND_THREONINE_METABOLISM	189
KEGG_GLYCINE_SERINE_AND_THREONINE_METABOLISM	1757
KEGG_GLYCINE_SERINE_AND_THREONINE_METABOLISM	275
KEGG_GLYCINE_SERINE_AND_THREONINE_METABOLISM	55349
KEGG_GLYCINE_SERINE_AND_THREONINE_METABOLISM	875
KEGG_GLYCINE_SERINE_AND_THREONINE_METABOLISM	1491
KEGG_GLYCINE_SERINE_AND_THREONINE_METABOLISM	51268
KEGG_GLYCINE_SERINE_AND_THREONINE_METABOLISM	1610
KEGG_CYSTEINE_AND_METHIONINE_METABOLISM	262
KEGG_CYSTEINE_AND_METHIONINE_METABOLISM	6723
KEGG_CYSTEINE_AND_METHIONINE_METABOLISM	55256
KEGG_CYSTEINE_AND_METHIONINE_METABOLISM	191
KEGG_CYSTEINE_AND_METHIONINE_METABOLISM	1786
KEGG_CYSTEINE_AND_METHIONINE_METABOLISM	10993
KEGG_CYSTEINE_AND_METHIONINE_METABOLISM	1787
KEGG_CYSTEINE_AND_METHIONINE_METABOLISM	1788
KEGG_CYSTEINE_AND_METHIONINE_METABOLISM	1789
KEGG_CYSTEINE_AND_METHIONINE_METABOLISM	3948
KEGG_CYSTEINE_AND_METHIONINE_METABOLISM	259307
KEGG_CYSTEINE_AND_METHIONINE_METABOLISM	6611
KEGG_CYSTEINE_AND_METHIONINE_METABOLISM	3945
KEGG_CYSTEINE_AND_METHIONINE_METABOLISM	58478
KEGG_CYSTEINE_AND_METHIONINE_METABOLISM	635
KEGG_CYSTEINE_AND_METHIONINE_METABOLISM	2806
KEGG_CYSTEINE_AND_METHIONINE_METABOLISM	1036
KEGG_CYSTEINE_AND_METHIONINE_METABOLISM	51074
KEGG_CYSTEINE_AND_METHIONINE_METABOLISM	2805
KEGG_CYSTEINE_AND_METHIONINE_METABOLISM	92483
KEGG_CYSTEINE_AND_METHIONINE_METABOLISM	6898
KEGG_CYSTEINE_AND_METHIONINE_METABOLISM	10768
KEGG_CYSTEINE_AND_METHIONINE_METABOLISM	4507
KEGG_CYSTEINE_AND_METHIONINE_METABOLISM	27430
KEGG_CYSTEINE_AND_METHIONINE_METABOLISM	3939
KEGG_CYSTEINE_AND_METHIONINE_METABOLISM	4548
KEGG_CYSTEINE_AND_METHIONINE_METABOLISM	875
KEGG_CYSTEINE_AND_METHIONINE_METABOLISM	4143
KEGG_CYSTEINE_AND_METHIONINE_METABOLISM	23382
KEGG_CYSTEINE_AND_METHIONINE_METABOLISM	1491
KEGG_CYSTEINE_AND_METHIONINE_METABOLISM	4144
KEGG_CYSTEINE_AND_METHIONINE_METABOLISM	4357
KEGG_CYSTEINE_AND_METHIONINE_METABOLISM	160287
KEGG_CYSTEINE_AND_METHIONINE_METABOLISM	29947
KEGG_VALINE_LEUCINE_AND_ISOLEUCINE_DEGRADATION	316
KEGG_VALINE_LEUCINE_AND_ISOLEUCINE_DEGRADATION	219
KEGG_VALINE_LEUCINE_AND_ISOLEUCINE_DEGRADATION	35
KEGG_VALINE_LEUCINE_AND_ISOLEUCINE_DEGRADATION	36
KEGG_VALINE_LEUCINE_AND_ISOLEUCINE_DEGRADATION	18
KEGG_VALINE_LEUCINE_AND_ISOLEUCINE_DEGRADATION	217
KEGG_VALINE_LEUCINE_AND_ISOLEUCINE_DEGRADATION	34
KEGG_VALINE_LEUCINE_AND_ISOLEUCINE_DEGRADATION	39
KEGG_VALINE_LEUCINE_AND_ISOLEUCINE_DEGRADATION	3028
KEGG_VALINE_LEUCINE_AND_ISOLEUCINE_DEGRADATION	38
KEGG_VALINE_LEUCINE_AND_ISOLEUCINE_DEGRADATION	5019
KEGG_VALINE_LEUCINE_AND_ISOLEUCINE_DEGRADATION	10449
KEGG_VALINE_LEUCINE_AND_ISOLEUCINE_DEGRADATION	259307
KEGG_VALINE_LEUCINE_AND_ISOLEUCINE_DEGRADATION	3033
KEGG_VALINE_LEUCINE_AND_ISOLEUCINE_DEGRADATION	84693
KEGG_VALINE_LEUCINE_AND_ISOLEUCINE_DEGRADATION	3032
KEGG_VALINE_LEUCINE_AND_ISOLEUCINE_DEGRADATION	1629
KEGG_VALINE_LEUCINE_AND_ISOLEUCINE_DEGRADATION	3030
KEGG_VALINE_LEUCINE_AND_ISOLEUCINE_DEGRADATION	4329
KEGG_VALINE_LEUCINE_AND_ISOLEUCINE_DEGRADATION	3155
KEGG_VALINE_LEUCINE_AND_ISOLEUCINE_DEGRADATION	3712
KEGG_VALINE_LEUCINE_AND_ISOLEUCINE_DEGRADATION	594
KEGG_VALINE_LEUCINE_AND_ISOLEUCINE_DEGRADATION	27034
KEGG_VALINE_LEUCINE_AND_ISOLEUCINE_DEGRADATION	1892
KEGG_VALINE_LEUCINE_AND_ISOLEUCINE_DEGRADATION	223
KEGG_VALINE_LEUCINE_AND_ISOLEUCINE_DEGRADATION	224
KEGG_VALINE_LEUCINE_AND_ISOLEUCINE_DEGRADATION	5096
KEGG_VALINE_LEUCINE_AND_ISOLEUCINE_DEGRADATION	26275
KEGG_VALINE_LEUCINE_AND_ISOLEUCINE_DEGRADATION	1738
KEGG_VALINE_LEUCINE_AND_ISOLEUCINE_DEGRADATION	3158
KEGG_VALINE_LEUCINE_AND_ISOLEUCINE_DEGRADATION	1962
KEGG_VALINE_LEUCINE_AND_ISOLEUCINE_DEGRADATION	3157
KEGG_VALINE_LEUCINE_AND_ISOLEUCINE_DEGRADATION	5095
KEGG_VALINE_LEUCINE_AND_ISOLEUCINE_DEGRADATION	501
KEGG_VALINE_LEUCINE_AND_ISOLEUCINE_DEGRADATION	11112
KEGG_VALINE_LEUCINE_AND_ISOLEUCINE_DEGRADATION	30
KEGG_VALINE_LEUCINE_AND_ISOLEUCINE_DEGRADATION	64064
KEGG_VALINE_LEUCINE_AND_ISOLEUCINE_DEGRADATION	4594
KEGG_VALINE_LEUCINE_AND_ISOLEUCINE_DEGRADATION	64087
KEGG_VALINE_LEUCINE_AND_ISOLEUCINE_DEGRADATION	586
KEGG_VALINE_LEUCINE_AND_ISOLEUCINE_DEGRADATION	549
KEGG_VALINE_LEUCINE_AND_ISOLEUCINE_DEGRADATION	587
KEGG_VALINE_LEUCINE_AND_ISOLEUCINE_DEGRADATION	593
KEGG_VALINE_LEUCINE_AND_ISOLEUCINE_DEGRADATION	56922
KEGG_VALINE_LEUCINE_AND_ISOLEUCINE_BIOSYNTHESIS	5162
KEGG_VALINE_LEUCINE_AND_ISOLEUCINE_BIOSYNTHESIS	57176
KEGG_VALINE_LEUCINE_AND_ISOLEUCINE_BIOSYNTHESIS	55699
KEGG_VALINE_LEUCINE_AND_ISOLEUCINE_BIOSYNTHESIS	5160
KEGG_VALINE_LEUCINE_AND_ISOLEUCINE_BIOSYNTHESIS	5161
KEGG_VALINE_LEUCINE_AND_ISOLEUCINE_BIOSYNTHESIS	51520
KEGG_VALINE_LEUCINE_AND_ISOLEUCINE_BIOSYNTHESIS	23395
KEGG_VALINE_LEUCINE_AND_ISOLEUCINE_BIOSYNTHESIS	7407
KEGG_VALINE_LEUCINE_AND_ISOLEUCINE_BIOSYNTHESIS	586
KEGG_VALINE_LEUCINE_AND_ISOLEUCINE_BIOSYNTHESIS	587
KEGG_VALINE_LEUCINE_AND_ISOLEUCINE_BIOSYNTHESIS	3376
KEGG_LYSINE_DEGRADATION	79723
KEGG_LYSINE_DEGRADATION	60496
KEGG_LYSINE_DEGRADATION	1743
KEGG_LYSINE_DEGRADATION	219
KEGG_LYSINE_DEGRADATION	132949
KEGG_LYSINE_DEGRADATION	217
KEGG_LYSINE_DEGRADATION	39
KEGG_LYSINE_DEGRADATION	5352
KEGG_LYSINE_DEGRADATION	5351
KEGG_LYSINE_DEGRADATION	55217
KEGG_LYSINE_DEGRADATION	10919
KEGG_LYSINE_DEGRADATION	38
KEGG_LYSINE_DEGRADATION	387893
KEGG_LYSINE_DEGRADATION	3033
KEGG_LYSINE_DEGRADATION	6419
KEGG_LYSINE_DEGRADATION	4967
KEGG_LYSINE_DEGRADATION	3030
KEGG_LYSINE_DEGRADATION	8424
KEGG_LYSINE_DEGRADATION	10157
KEGG_LYSINE_DEGRADATION	1892
KEGG_LYSINE_DEGRADATION	223
KEGG_LYSINE_DEGRADATION	224
KEGG_LYSINE_DEGRADATION	51111
KEGG_LYSINE_DEGRADATION	6839
KEGG_LYSINE_DEGRADATION	55870
KEGG_LYSINE_DEGRADATION	23067
KEGG_LYSINE_DEGRADATION	84444
KEGG_LYSINE_DEGRADATION	7468
KEGG_LYSINE_DEGRADATION	1962
KEGG_LYSINE_DEGRADATION	55753
KEGG_LYSINE_DEGRADATION	9739
KEGG_LYSINE_DEGRADATION	2639
KEGG_LYSINE_DEGRADATION	84787
KEGG_LYSINE_DEGRADATION	80854
KEGG_LYSINE_DEGRADATION	501
KEGG_LYSINE_DEGRADATION	54904
KEGG_LYSINE_DEGRADATION	79813
KEGG_LYSINE_DEGRADATION	9869
KEGG_LYSINE_DEGRADATION	51166
KEGG_LYSINE_DEGRADATION	29072
KEGG_LYSINE_DEGRADATION	83852
KEGG_LYSINE_DEGRADATION	8985
KEGG_LYSINE_DEGRADATION	64324
KEGG_LYSINE_DEGRADATION	51268
KEGG_ARGININE_AND_PROLINE_METABOLISM	6723
KEGG_ARGININE_AND_PROLINE_METABOLISM	113451
KEGG_ARGININE_AND_PROLINE_METABOLISM	2747
KEGG_ARGININE_AND_PROLINE_METABOLISM	27165
KEGG_ARGININE_AND_PROLINE_METABOLISM	383
KEGG_ARGININE_AND_PROLINE_METABOLISM	384
KEGG_ARGININE_AND_PROLINE_METABOLISM	2746
KEGG_ARGININE_AND_PROLINE_METABOLISM	2744
KEGG_ARGININE_AND_PROLINE_METABOLISM	435
KEGG_ARGININE_AND_PROLINE_METABOLISM	8974
KEGG_ARGININE_AND_PROLINE_METABOLISM	6611
KEGG_ARGININE_AND_PROLINE_METABOLISM	1152
KEGG_ARGININE_AND_PROLINE_METABOLISM	4846
KEGG_ARGININE_AND_PROLINE_METABOLISM	4843
KEGG_ARGININE_AND_PROLINE_METABOLISM	4842
KEGG_ARGININE_AND_PROLINE_METABOLISM	2806
KEGG_ARGININE_AND_PROLINE_METABOLISM	2752
KEGG_ARGININE_AND_PROLINE_METABOLISM	5033
KEGG_ARGININE_AND_PROLINE_METABOLISM	26
KEGG_ARGININE_AND_PROLINE_METABOLISM	501
KEGG_ARGININE_AND_PROLINE_METABOLISM	51056
KEGG_ARGININE_AND_PROLINE_METABOLISM	79814
KEGG_ARGININE_AND_PROLINE_METABOLISM	2805
KEGG_ARGININE_AND_PROLINE_METABOLISM	5831
KEGG_ARGININE_AND_PROLINE_METABOLISM	445
KEGG_ARGININE_AND_PROLINE_METABOLISM	5832
KEGG_ARGININE_AND_PROLINE_METABOLISM	6303
KEGG_ARGININE_AND_PROLINE_METABOLISM	162417
KEGG_ARGININE_AND_PROLINE_METABOLISM	1610
KEGG_ARGININE_AND_PROLINE_METABOLISM	262
KEGG_ARGININE_AND_PROLINE_METABOLISM	4129
KEGG_ARGININE_AND_PROLINE_METABOLISM	4128
KEGG_ARGININE_AND_PROLINE_METABOLISM	1373
KEGG_ARGININE_AND_PROLINE_METABOLISM	283208
KEGG_ARGININE_AND_PROLINE_METABOLISM	219
KEGG_ARGININE_AND_PROLINE_METABOLISM	2628
KEGG_ARGININE_AND_PROLINE_METABOLISM	217
KEGG_ARGININE_AND_PROLINE_METABOLISM	5009
KEGG_ARGININE_AND_PROLINE_METABOLISM	58510
KEGG_ARGININE_AND_PROLINE_METABOLISM	4942
KEGG_ARGININE_AND_PROLINE_METABOLISM	1158
KEGG_ARGININE_AND_PROLINE_METABOLISM	95
KEGG_ARGININE_AND_PROLINE_METABOLISM	112483
KEGG_ARGININE_AND_PROLINE_METABOLISM	223
KEGG_ARGININE_AND_PROLINE_METABOLISM	224
KEGG_ARGININE_AND_PROLINE_METABOLISM	1159
KEGG_ARGININE_AND_PROLINE_METABOLISM	65263
KEGG_ARGININE_AND_PROLINE_METABOLISM	2593
KEGG_ARGININE_AND_PROLINE_METABOLISM	5625
KEGG_ARGININE_AND_PROLINE_METABOLISM	8659
KEGG_ARGININE_AND_PROLINE_METABOLISM	1160
KEGG_ARGININE_AND_PROLINE_METABOLISM	29920
KEGG_ARGININE_AND_PROLINE_METABOLISM	4953
KEGG_HISTIDINE_METABOLISM	84735
KEGG_HISTIDINE_METABOLISM	4129
KEGG_HISTIDINE_METABOLISM	4128
KEGG_HISTIDINE_METABOLISM	219
KEGG_HISTIDINE_METABOLISM	217
KEGG_HISTIDINE_METABOLISM	131965
KEGG_HISTIDINE_METABOLISM	218
KEGG_HISTIDINE_METABOLISM	114049
KEGG_HISTIDINE_METABOLISM	3034
KEGG_HISTIDINE_METABOLISM	3176
KEGG_HISTIDINE_METABOLISM	1644
KEGG_HISTIDINE_METABOLISM	91703
KEGG_HISTIDINE_METABOLISM	220
KEGG_HISTIDINE_METABOLISM	55798
KEGG_HISTIDINE_METABOLISM	221
KEGG_HISTIDINE_METABOLISM	222
KEGG_HISTIDINE_METABOLISM	223
KEGG_HISTIDINE_METABOLISM	224
KEGG_HISTIDINE_METABOLISM	51409
KEGG_HISTIDINE_METABOLISM	9836
KEGG_HISTIDINE_METABOLISM	131669
KEGG_HISTIDINE_METABOLISM	60487
KEGG_HISTIDINE_METABOLISM	26
KEGG_HISTIDINE_METABOLISM	501
KEGG_HISTIDINE_METABOLISM	10841
KEGG_HISTIDINE_METABOLISM	144193
KEGG_HISTIDINE_METABOLISM	443
KEGG_HISTIDINE_METABOLISM	51451
KEGG_HISTIDINE_METABOLISM	3067
KEGG_TYROSINE_METABOLISM	4129
KEGG_TYROSINE_METABOLISM	4128
KEGG_TYROSINE_METABOLISM	3242
KEGG_TYROSINE_METABOLISM	316
KEGG_TYROSINE_METABOLISM	314
KEGG_TYROSINE_METABOLISM	7299
KEGG_TYROSINE_METABOLISM	3081
KEGG_TYROSINE_METABOLISM	131965
KEGG_TYROSINE_METABOLISM	218
KEGG_TYROSINE_METABOLISM	1312
KEGG_TYROSINE_METABOLISM	8639
KEGG_TYROSINE_METABOLISM	114049
KEGG_TYROSINE_METABOLISM	259307
KEGG_TYROSINE_METABOLISM	2954
KEGG_TYROSINE_METABOLISM	1644
KEGG_TYROSINE_METABOLISM	131
KEGG_TYROSINE_METABOLISM	1621
KEGG_TYROSINE_METABOLISM	130
KEGG_TYROSINE_METABOLISM	55798
KEGG_TYROSINE_METABOLISM	125
KEGG_TYROSINE_METABOLISM	220
KEGG_TYROSINE_METABOLISM	126
KEGG_TYROSINE_METABOLISM	221
KEGG_TYROSINE_METABOLISM	127
KEGG_TYROSINE_METABOLISM	222
KEGG_TYROSINE_METABOLISM	128
KEGG_TYROSINE_METABOLISM	51409
KEGG_TYROSINE_METABOLISM	124
KEGG_TYROSINE_METABOLISM	2806
KEGG_TYROSINE_METABOLISM	9836
KEGG_TYROSINE_METABOLISM	60487
KEGG_TYROSINE_METABOLISM	2805
KEGG_TYROSINE_METABOLISM	7306
KEGG_TYROSINE_METABOLISM	6898
KEGG_TYROSINE_METABOLISM	4282
KEGG_TYROSINE_METABOLISM	24142
KEGG_TYROSINE_METABOLISM	5409
KEGG_TYROSINE_METABOLISM	1638
KEGG_TYROSINE_METABOLISM	51451
KEGG_TYROSINE_METABOLISM	7173
KEGG_TYROSINE_METABOLISM	7054
KEGG_TYROSINE_METABOLISM	2184
KEGG_PHENYLALANINE_METABOLISM	220
KEGG_PHENYLALANINE_METABOLISM	221
KEGG_PHENYLALANINE_METABOLISM	222
KEGG_PHENYLALANINE_METABOLISM	4129
KEGG_PHENYLALANINE_METABOLISM	4128
KEGG_PHENYLALANINE_METABOLISM	3242
KEGG_PHENYLALANINE_METABOLISM	2806
KEGG_PHENYLALANINE_METABOLISM	314
KEGG_PHENYLALANINE_METABOLISM	218
KEGG_PHENYLALANINE_METABOLISM	8639
KEGG_PHENYLALANINE_METABOLISM	5053
KEGG_PHENYLALANINE_METABOLISM	2805
KEGG_PHENYLALANINE_METABOLISM	9588
KEGG_PHENYLALANINE_METABOLISM	6898
KEGG_PHENYLALANINE_METABOLISM	4282
KEGG_PHENYLALANINE_METABOLISM	24142
KEGG_PHENYLALANINE_METABOLISM	259307
KEGG_PHENYLALANINE_METABOLISM	1644
KEGG_TRYPTOPHAN_METABOLISM	4129
KEGG_TRYPTOPHAN_METABOLISM	4128
KEGG_TRYPTOPHAN_METABOLISM	169355
KEGG_TRYPTOPHAN_METABOLISM	316
KEGG_TRYPTOPHAN_METABOLISM	219
KEGG_TRYPTOPHAN_METABOLISM	15
KEGG_TRYPTOPHAN_METABOLISM	217
KEGG_TRYPTOPHAN_METABOLISM	7453
KEGG_TRYPTOPHAN_METABOLISM	3620
KEGG_TRYPTOPHAN_METABOLISM	847
KEGG_TRYPTOPHAN_METABOLISM	39
KEGG_TRYPTOPHAN_METABOLISM	38
KEGG_TRYPTOPHAN_METABOLISM	259307
KEGG_TRYPTOPHAN_METABOLISM	3033
KEGG_TRYPTOPHAN_METABOLISM	4967
KEGG_TRYPTOPHAN_METABOLISM	7166
KEGG_TRYPTOPHAN_METABOLISM	3030
KEGG_TRYPTOPHAN_METABOLISM	1644
KEGG_TRYPTOPHAN_METABOLISM	125061
KEGG_TRYPTOPHAN_METABOLISM	1543
KEGG_TRYPTOPHAN_METABOLISM	1544
KEGG_TRYPTOPHAN_METABOLISM	1545
KEGG_TRYPTOPHAN_METABOLISM	438
KEGG_TRYPTOPHAN_METABOLISM	1892
KEGG_TRYPTOPHAN_METABOLISM	223
KEGG_TRYPTOPHAN_METABOLISM	8564
KEGG_TRYPTOPHAN_METABOLISM	224
KEGG_TRYPTOPHAN_METABOLISM	10352
KEGG_TRYPTOPHAN_METABOLISM	1962
KEGG_TRYPTOPHAN_METABOLISM	55753
KEGG_TRYPTOPHAN_METABOLISM	2639
KEGG_TRYPTOPHAN_METABOLISM	501
KEGG_TRYPTOPHAN_METABOLISM	26
KEGG_TRYPTOPHAN_METABOLISM	11185
KEGG_TRYPTOPHAN_METABOLISM	6999
KEGG_TRYPTOPHAN_METABOLISM	23498
KEGG_TRYPTOPHAN_METABOLISM	8942
KEGG_TRYPTOPHAN_METABOLISM	51166
KEGG_TRYPTOPHAN_METABOLISM	121278
KEGG_TRYPTOPHAN_METABOLISM	130013
KEGG_BETA_ALANINE_METABOLISM	84735
KEGG_BETA_ALANINE_METABOLISM	6723
KEGG_BETA_ALANINE_METABOLISM	1892
KEGG_BETA_ALANINE_METABOLISM	223
KEGG_BETA_ALANINE_METABOLISM	224
KEGG_BETA_ALANINE_METABOLISM	2571
KEGG_BETA_ALANINE_METABOLISM	2572
KEGG_BETA_ALANINE_METABOLISM	314
KEGG_BETA_ALANINE_METABOLISM	219
KEGG_BETA_ALANINE_METABOLISM	26275
KEGG_BETA_ALANINE_METABOLISM	18
KEGG_BETA_ALANINE_METABOLISM	1962
KEGG_BETA_ALANINE_METABOLISM	217
KEGG_BETA_ALANINE_METABOLISM	34
KEGG_BETA_ALANINE_METABOLISM	51733
KEGG_BETA_ALANINE_METABOLISM	501
KEGG_BETA_ALANINE_METABOLISM	8639
KEGG_BETA_ALANINE_METABOLISM	1807
KEGG_BETA_ALANINE_METABOLISM	1806
KEGG_BETA_ALANINE_METABOLISM	23417
KEGG_BETA_ALANINE_METABOLISM	3030
KEGG_BETA_ALANINE_METABOLISM	6611
KEGG_TAURINE_AND_HYPOTAURINE_METABOLISM	2686
KEGG_TAURINE_AND_HYPOTAURINE_METABOLISM	51380
KEGG_TAURINE_AND_HYPOTAURINE_METABOLISM	2687
KEGG_TAURINE_AND_HYPOTAURINE_METABOLISM	2678
KEGG_TAURINE_AND_HYPOTAURINE_METABOLISM	2571
KEGG_TAURINE_AND_HYPOTAURINE_METABOLISM	570
KEGG_TAURINE_AND_HYPOTAURINE_METABOLISM	2572
KEGG_TAURINE_AND_HYPOTAURINE_METABOLISM	124975
KEGG_TAURINE_AND_HYPOTAURINE_METABOLISM	1036
KEGG_TAURINE_AND_HYPOTAURINE_METABOLISM	84890
KEGG_SELENOAMINO_ACID_METABOLISM	131965
KEGG_SELENOAMINO_ACID_METABOLISM	191
KEGG_SELENOAMINO_ACID_METABOLISM	114049
KEGG_SELENOAMINO_ACID_METABOLISM	22929
KEGG_SELENOAMINO_ACID_METABOLISM	2678
KEGG_SELENOAMINO_ACID_METABOLISM	22928
KEGG_SELENOAMINO_ACID_METABOLISM	55798
KEGG_SELENOAMINO_ACID_METABOLISM	51409
KEGG_SELENOAMINO_ACID_METABOLISM	124975
KEGG_SELENOAMINO_ACID_METABOLISM	9836
KEGG_SELENOAMINO_ACID_METABOLISM	9061
KEGG_SELENOAMINO_ACID_METABOLISM	9060
KEGG_SELENOAMINO_ACID_METABOLISM	60487
KEGG_SELENOAMINO_ACID_METABOLISM	51540
KEGG_SELENOAMINO_ACID_METABOLISM	10768
KEGG_SELENOAMINO_ACID_METABOLISM	2686
KEGG_SELENOAMINO_ACID_METABOLISM	2687
KEGG_SELENOAMINO_ACID_METABOLISM	27430
KEGG_SELENOAMINO_ACID_METABOLISM	4143
KEGG_SELENOAMINO_ACID_METABOLISM	51451
KEGG_SELENOAMINO_ACID_METABOLISM	875
KEGG_SELENOAMINO_ACID_METABOLISM	23382
KEGG_SELENOAMINO_ACID_METABOLISM	1491
KEGG_SELENOAMINO_ACID_METABOLISM	4144
KEGG_SELENOAMINO_ACID_METABOLISM	4141
KEGG_GLUTATHIONE_METABOLISM	6723
KEGG_GLUTATHIONE_METABOLISM	2678
KEGG_GLUTATHIONE_METABOLISM	2950
KEGG_GLUTATHIONE_METABOLISM	2953
KEGG_GLUTATHIONE_METABOLISM	2952
KEGG_GLUTATHIONE_METABOLISM	2954
KEGG_GLUTATHIONE_METABOLISM	50484
KEGG_GLUTATHIONE_METABOLISM	6611
KEGG_GLUTATHIONE_METABOLISM	5226
KEGG_GLUTATHIONE_METABOLISM	9446
KEGG_GLUTATHIONE_METABOLISM	4258
KEGG_GLUTATHIONE_METABOLISM	51056
KEGG_GLUTATHIONE_METABOLISM	4257
KEGG_GLUTATHIONE_METABOLISM	4259
KEGG_GLUTATHIONE_METABOLISM	2940
KEGG_GLUTATHIONE_METABOLISM	2944
KEGG_GLUTATHIONE_METABOLISM	2882
KEGG_GLUTATHIONE_METABOLISM	2941
KEGG_GLUTATHIONE_METABOLISM	2948
KEGG_GLUTATHIONE_METABOLISM	79017
KEGG_GLUTATHIONE_METABOLISM	2947
KEGG_GLUTATHIONE_METABOLISM	2946
KEGG_GLUTATHIONE_METABOLISM	2949
KEGG_GLUTATHIONE_METABOLISM	2938
KEGG_GLUTATHIONE_METABOLISM	2939
KEGG_GLUTATHIONE_METABOLISM	2936
KEGG_GLUTATHIONE_METABOLISM	2937
KEGG_GLUTATHIONE_METABOLISM	6240
KEGG_GLUTATHIONE_METABOLISM	6241
KEGG_GLUTATHIONE_METABOLISM	2729
KEGG_GLUTATHIONE_METABOLISM	373156
KEGG_GLUTATHIONE_METABOLISM	2880
KEGG_GLUTATHIONE_METABOLISM	51060
KEGG_GLUTATHIONE_METABOLISM	2876
KEGG_GLUTATHIONE_METABOLISM	2877
KEGG_GLUTATHIONE_METABOLISM	2878
KEGG_GLUTATHIONE_METABOLISM	3418
KEGG_GLUTATHIONE_METABOLISM	2879
KEGG_GLUTATHIONE_METABOLISM	3417
KEGG_GLUTATHIONE_METABOLISM	26873
KEGG_GLUTATHIONE_METABOLISM	2730
KEGG_GLUTATHIONE_METABOLISM	124975
KEGG_GLUTATHIONE_METABOLISM	290
KEGG_GLUTATHIONE_METABOLISM	2686
KEGG_GLUTATHIONE_METABOLISM	119391
KEGG_GLUTATHIONE_METABOLISM	2687
KEGG_GLUTATHIONE_METABOLISM	2539
KEGG_GLUTATHIONE_METABOLISM	4953
KEGG_STARCH_AND_SUCROSE_METABOLISM	5169
KEGG_STARCH_AND_SUCROSE_METABOLISM	2645
KEGG_STARCH_AND_SUCROSE_METABOLISM	5167
KEGG_STARCH_AND_SUCROSE_METABOLISM	280
KEGG_STARCH_AND_SUCROSE_METABOLISM	54490
KEGG_STARCH_AND_SUCROSE_METABOLISM	55276
KEGG_STARCH_AND_SUCROSE_METABOLISM	80146
KEGG_STARCH_AND_SUCROSE_METABOLISM	7358
KEGG_STARCH_AND_SUCROSE_METABOLISM	8972
KEGG_STARCH_AND_SUCROSE_METABOLISM	2997
KEGG_STARCH_AND_SUCROSE_METABOLISM	2998
KEGG_STARCH_AND_SUCROSE_METABOLISM	3099
KEGG_STARCH_AND_SUCROSE_METABOLISM	3101
KEGG_STARCH_AND_SUCROSE_METABOLISM	3098
KEGG_STARCH_AND_SUCROSE_METABOLISM	57733
KEGG_STARCH_AND_SUCROSE_METABOLISM	2990
KEGG_STARCH_AND_SUCROSE_METABOLISM	11181
KEGG_STARCH_AND_SUCROSE_METABOLISM	276
KEGG_STARCH_AND_SUCROSE_METABOLISM	5834
KEGG_STARCH_AND_SUCROSE_METABOLISM	5837
KEGG_STARCH_AND_SUCROSE_METABOLISM	5836
KEGG_STARCH_AND_SUCROSE_METABOLISM	79799
KEGG_STARCH_AND_SUCROSE_METABOLISM	54658
KEGG_STARCH_AND_SUCROSE_METABOLISM	54659
KEGG_STARCH_AND_SUCROSE_METABOLISM	54576
KEGG_STARCH_AND_SUCROSE_METABOLISM	54578
KEGG_STARCH_AND_SUCROSE_METABOLISM	283209
KEGG_STARCH_AND_SUCROSE_METABOLISM	178
KEGG_STARCH_AND_SUCROSE_METABOLISM	6476
KEGG_STARCH_AND_SUCROSE_METABOLISM	10941
KEGG_STARCH_AND_SUCROSE_METABOLISM	2632
KEGG_STARCH_AND_SUCROSE_METABOLISM	54600
KEGG_STARCH_AND_SUCROSE_METABOLISM	57818
KEGG_STARCH_AND_SUCROSE_METABOLISM	2595
KEGG_STARCH_AND_SUCROSE_METABOLISM	2538
KEGG_STARCH_AND_SUCROSE_METABOLISM	7360
KEGG_STARCH_AND_SUCROSE_METABOLISM	5236
KEGG_STARCH_AND_SUCROSE_METABOLISM	7363
KEGG_STARCH_AND_SUCROSE_METABOLISM	2548
KEGG_STARCH_AND_SUCROSE_METABOLISM	2821
KEGG_STARCH_AND_SUCROSE_METABOLISM	7367
KEGG_STARCH_AND_SUCROSE_METABOLISM	7366
KEGG_N_GLYCAN_BIOSYNTHESIS	79868
KEGG_N_GLYCAN_BIOSYNTHESIS	57171
KEGG_N_GLYCAN_BIOSYNTHESIS	6184
KEGG_N_GLYCAN_BIOSYNTHESIS	199857
KEGG_N_GLYCAN_BIOSYNTHESIS	11253
KEGG_N_GLYCAN_BIOSYNTHESIS	10195
KEGG_N_GLYCAN_BIOSYNTHESIS	2683
KEGG_N_GLYCAN_BIOSYNTHESIS	4249
KEGG_N_GLYCAN_BIOSYNTHESIS	6185
KEGG_N_GLYCAN_BIOSYNTHESIS	3703
KEGG_N_GLYCAN_BIOSYNTHESIS	4248
KEGG_N_GLYCAN_BIOSYNTHESIS	1603
KEGG_N_GLYCAN_BIOSYNTHESIS	4247
KEGG_N_GLYCAN_BIOSYNTHESIS	79087
KEGG_N_GLYCAN_BIOSYNTHESIS	7991
KEGG_N_GLYCAN_BIOSYNTHESIS	57134
KEGG_N_GLYCAN_BIOSYNTHESIS	8818
KEGG_N_GLYCAN_BIOSYNTHESIS	8813
KEGG_N_GLYCAN_BIOSYNTHESIS	23193
KEGG_N_GLYCAN_BIOSYNTHESIS	56052
KEGG_N_GLYCAN_BIOSYNTHESIS	11320
KEGG_N_GLYCAN_BIOSYNTHESIS	144245
KEGG_N_GLYCAN_BIOSYNTHESIS	201595
KEGG_N_GLYCAN_BIOSYNTHESIS	10905
KEGG_N_GLYCAN_BIOSYNTHESIS	84920
KEGG_N_GLYCAN_BIOSYNTHESIS	79053
KEGG_N_GLYCAN_BIOSYNTHESIS	85365
KEGG_N_GLYCAN_BIOSYNTHESIS	1798
KEGG_N_GLYCAN_BIOSYNTHESIS	91869
KEGG_N_GLYCAN_BIOSYNTHESIS	54344
KEGG_N_GLYCAN_BIOSYNTHESIS	1650
KEGG_N_GLYCAN_BIOSYNTHESIS	11282
KEGG_N_GLYCAN_BIOSYNTHESIS	29929
KEGG_N_GLYCAN_BIOSYNTHESIS	4122
KEGG_N_GLYCAN_BIOSYNTHESIS	4121
KEGG_N_GLYCAN_BIOSYNTHESIS	4124
KEGG_N_GLYCAN_BIOSYNTHESIS	6480
KEGG_N_GLYCAN_BIOSYNTHESIS	8703
KEGG_N_GLYCAN_BIOSYNTHESIS	29880
KEGG_N_GLYCAN_BIOSYNTHESIS	8704
KEGG_N_GLYCAN_BIOSYNTHESIS	146664
KEGG_N_GLYCAN_BIOSYNTHESIS	79796
KEGG_N_GLYCAN_BIOSYNTHESIS	7841
KEGG_N_GLYCAN_BIOSYNTHESIS	2530
KEGG_N_GLYCAN_BIOSYNTHESIS	4245
KEGG_OTHER_GLYCAN_DEGRADATION	64772
KEGG_OTHER_GLYCAN_DEGRADATION	2720
KEGG_OTHER_GLYCAN_DEGRADATION	4126
KEGG_OTHER_GLYCAN_DEGRADATION	4125
KEGG_OTHER_GLYCAN_DEGRADATION	2629
KEGG_OTHER_GLYCAN_DEGRADATION	129807
KEGG_OTHER_GLYCAN_DEGRADATION	4759
KEGG_OTHER_GLYCAN_DEGRADATION	4758
KEGG_OTHER_GLYCAN_DEGRADATION	2517
KEGG_OTHER_GLYCAN_DEGRADATION	2519
KEGG_OTHER_GLYCAN_DEGRADATION	175
KEGG_OTHER_GLYCAN_DEGRADATION	4123
KEGG_OTHER_GLYCAN_DEGRADATION	23324
KEGG_OTHER_GLYCAN_DEGRADATION	10825
KEGG_OTHER_GLYCAN_DEGRADATION	3074
KEGG_OTHER_GLYCAN_DEGRADATION	3073
KEGG_O_GLYCAN_BIOSYNTHESIS	8693
KEGG_O_GLYCAN_BIOSYNTHESIS	117248
KEGG_O_GLYCAN_BIOSYNTHESIS	168391
KEGG_O_GLYCAN_BIOSYNTHESIS	11226
KEGG_O_GLYCAN_BIOSYNTHESIS	11227
KEGG_O_GLYCAN_BIOSYNTHESIS	57452
KEGG_O_GLYCAN_BIOSYNTHESIS	442117
KEGG_O_GLYCAN_BIOSYNTHESIS	114805
KEGG_O_GLYCAN_BIOSYNTHESIS	9245
KEGG_O_GLYCAN_BIOSYNTHESIS	55568
KEGG_O_GLYCAN_BIOSYNTHESIS	55808
KEGG_O_GLYCAN_BIOSYNTHESIS	50614
KEGG_O_GLYCAN_BIOSYNTHESIS	51809
KEGG_O_GLYCAN_BIOSYNTHESIS	51301
KEGG_O_GLYCAN_BIOSYNTHESIS	63917
KEGG_O_GLYCAN_BIOSYNTHESIS	2650
KEGG_O_GLYCAN_BIOSYNTHESIS	26290
KEGG_O_GLYCAN_BIOSYNTHESIS	79623
KEGG_O_GLYCAN_BIOSYNTHESIS	192134
KEGG_O_GLYCAN_BIOSYNTHESIS	56913
KEGG_O_GLYCAN_BIOSYNTHESIS	374378
KEGG_O_GLYCAN_BIOSYNTHESIS	79695
KEGG_O_GLYCAN_BIOSYNTHESIS	2590
KEGG_O_GLYCAN_BIOSYNTHESIS	2591
KEGG_O_GLYCAN_BIOSYNTHESIS	64409
KEGG_O_GLYCAN_BIOSYNTHESIS	2589
KEGG_O_GLYCAN_BIOSYNTHESIS	6483
KEGG_O_GLYCAN_BIOSYNTHESIS	6482
KEGG_O_GLYCAN_BIOSYNTHESIS	9334
KEGG_O_GLYCAN_BIOSYNTHESIS	29071
KEGG_AMINO_SUGAR_AND_NUCLEOTIDE_SUGAR_METABOLISM	4351
KEGG_AMINO_SUGAR_AND_NUCLEOTIDE_SUGAR_METABOLISM	2645
KEGG_AMINO_SUGAR_AND_NUCLEOTIDE_SUGAR_METABOLISM	9945
KEGG_AMINO_SUGAR_AND_NUCLEOTIDE_SUGAR_METABOLISM	2584
KEGG_AMINO_SUGAR_AND_NUCLEOTIDE_SUGAR_METABOLISM	2582
KEGG_AMINO_SUGAR_AND_NUCLEOTIDE_SUGAR_METABOLISM	5373
KEGG_AMINO_SUGAR_AND_NUCLEOTIDE_SUGAR_METABOLISM	55276
KEGG_AMINO_SUGAR_AND_NUCLEOTIDE_SUGAR_METABOLISM	5372
KEGG_AMINO_SUGAR_AND_NUCLEOTIDE_SUGAR_METABOLISM	51005
KEGG_AMINO_SUGAR_AND_NUCLEOTIDE_SUGAR_METABOLISM	132789
KEGG_AMINO_SUGAR_AND_NUCLEOTIDE_SUGAR_METABOLISM	2762
KEGG_AMINO_SUGAR_AND_NUCLEOTIDE_SUGAR_METABOLISM	80146
KEGG_AMINO_SUGAR_AND_NUCLEOTIDE_SUGAR_METABOLISM	64841
KEGG_AMINO_SUGAR_AND_NUCLEOTIDE_SUGAR_METABOLISM	54187
KEGG_AMINO_SUGAR_AND_NUCLEOTIDE_SUGAR_METABOLISM	7358
KEGG_AMINO_SUGAR_AND_NUCLEOTIDE_SUGAR_METABOLISM	1727
KEGG_AMINO_SUGAR_AND_NUCLEOTIDE_SUGAR_METABOLISM	2673
KEGG_AMINO_SUGAR_AND_NUCLEOTIDE_SUGAR_METABOLISM	197258
KEGG_AMINO_SUGAR_AND_NUCLEOTIDE_SUGAR_METABOLISM	140838
KEGG_AMINO_SUGAR_AND_NUCLEOTIDE_SUGAR_METABOLISM	51706
KEGG_AMINO_SUGAR_AND_NUCLEOTIDE_SUGAR_METABOLISM	8790
KEGG_AMINO_SUGAR_AND_NUCLEOTIDE_SUGAR_METABOLISM	3074
KEGG_AMINO_SUGAR_AND_NUCLEOTIDE_SUGAR_METABOLISM	3073
KEGG_AMINO_SUGAR_AND_NUCLEOTIDE_SUGAR_METABOLISM	3099
KEGG_AMINO_SUGAR_AND_NUCLEOTIDE_SUGAR_METABOLISM	3098
KEGG_AMINO_SUGAR_AND_NUCLEOTIDE_SUGAR_METABOLISM	3101
KEGG_AMINO_SUGAR_AND_NUCLEOTIDE_SUGAR_METABOLISM	2592
KEGG_AMINO_SUGAR_AND_NUCLEOTIDE_SUGAR_METABOLISM	10020
KEGG_AMINO_SUGAR_AND_NUCLEOTIDE_SUGAR_METABOLISM	55577
KEGG_AMINO_SUGAR_AND_NUCLEOTIDE_SUGAR_METABOLISM	1118
KEGG_AMINO_SUGAR_AND_NUCLEOTIDE_SUGAR_METABOLISM	6675
KEGG_AMINO_SUGAR_AND_NUCLEOTIDE_SUGAR_METABOLISM	5973
KEGG_AMINO_SUGAR_AND_NUCLEOTIDE_SUGAR_METABOLISM	27159
KEGG_AMINO_SUGAR_AND_NUCLEOTIDE_SUGAR_METABOLISM	80896
KEGG_AMINO_SUGAR_AND_NUCLEOTIDE_SUGAR_METABOLISM	7360
KEGG_AMINO_SUGAR_AND_NUCLEOTIDE_SUGAR_METABOLISM	2585
KEGG_AMINO_SUGAR_AND_NUCLEOTIDE_SUGAR_METABOLISM	7264
KEGG_AMINO_SUGAR_AND_NUCLEOTIDE_SUGAR_METABOLISM	5236
KEGG_AMINO_SUGAR_AND_NUCLEOTIDE_SUGAR_METABOLISM	55907
KEGG_AMINO_SUGAR_AND_NUCLEOTIDE_SUGAR_METABOLISM	5238
KEGG_AMINO_SUGAR_AND_NUCLEOTIDE_SUGAR_METABOLISM	10007
KEGG_AMINO_SUGAR_AND_NUCLEOTIDE_SUGAR_METABOLISM	29926
KEGG_AMINO_SUGAR_AND_NUCLEOTIDE_SUGAR_METABOLISM	2821
KEGG_AMINO_SUGAR_AND_NUCLEOTIDE_SUGAR_METABOLISM	29925
KEGG_GLYCOSAMINOGLYCAN_DEGRADATION	9955
KEGG_GLYCOSAMINOGLYCAN_DEGRADATION	10855
KEGG_GLYCOSAMINOGLYCAN_DEGRADATION	60495
KEGG_GLYCOSAMINOGLYCAN_DEGRADATION	2720
KEGG_GLYCOSAMINOGLYCAN_DEGRADATION	2990
KEGG_GLYCOSAMINOGLYCAN_DEGRADATION	8372
KEGG_GLYCOSAMINOGLYCAN_DEGRADATION	2799
KEGG_GLYCOSAMINOGLYCAN_DEGRADATION	23553
KEGG_GLYCOSAMINOGLYCAN_DEGRADATION	3373
KEGG_GLYCOSAMINOGLYCAN_DEGRADATION	8692
KEGG_GLYCOSAMINOGLYCAN_DEGRADATION	6677
KEGG_GLYCOSAMINOGLYCAN_DEGRADATION	138050
KEGG_GLYCOSAMINOGLYCAN_DEGRADATION	2588
KEGG_GLYCOSAMINOGLYCAN_DEGRADATION	3425
KEGG_GLYCOSAMINOGLYCAN_DEGRADATION	9953
KEGG_GLYCOSAMINOGLYCAN_DEGRADATION	6448
KEGG_GLYCOSAMINOGLYCAN_DEGRADATION	3074
KEGG_GLYCOSAMINOGLYCAN_DEGRADATION	4669
KEGG_GLYCOSAMINOGLYCAN_DEGRADATION	3073
KEGG_GLYCOSAMINOGLYCAN_DEGRADATION	3423
KEGG_GLYCOSAMINOGLYCAN_DEGRADATION	411
KEGG_GLYCOSAMINOGLYCAN_BIOSYNTHESIS_CHONDROITIN_SULFATE	29940
KEGG_GLYCOSAMINOGLYCAN_BIOSYNTHESIS_CHONDROITIN_SULFATE	126792
KEGG_GLYCOSAMINOGLYCAN_BIOSYNTHESIS_CHONDROITIN_SULFATE	79586
KEGG_GLYCOSAMINOGLYCAN_BIOSYNTHESIS_CHONDROITIN_SULFATE	64131
KEGG_GLYCOSAMINOGLYCAN_BIOSYNTHESIS_CHONDROITIN_SULFATE	337876
KEGG_GLYCOSAMINOGLYCAN_BIOSYNTHESIS_CHONDROITIN_SULFATE	64132
KEGG_GLYCOSAMINOGLYCAN_BIOSYNTHESIS_CHONDROITIN_SULFATE	113189
KEGG_GLYCOSAMINOGLYCAN_BIOSYNTHESIS_CHONDROITIN_SULFATE	27087
KEGG_GLYCOSAMINOGLYCAN_BIOSYNTHESIS_CHONDROITIN_SULFATE	22856
KEGG_GLYCOSAMINOGLYCAN_BIOSYNTHESIS_CHONDROITIN_SULFATE	50515
KEGG_GLYCOSAMINOGLYCAN_BIOSYNTHESIS_CHONDROITIN_SULFATE	54480
KEGG_GLYCOSAMINOGLYCAN_BIOSYNTHESIS_CHONDROITIN_SULFATE	51363
KEGG_GLYCOSAMINOGLYCAN_BIOSYNTHESIS_CHONDROITIN_SULFATE	11285
KEGG_GLYCOSAMINOGLYCAN_BIOSYNTHESIS_CHONDROITIN_SULFATE	56548
KEGG_GLYCOSAMINOGLYCAN_BIOSYNTHESIS_CHONDROITIN_SULFATE	10090
KEGG_GLYCOSAMINOGLYCAN_BIOSYNTHESIS_CHONDROITIN_SULFATE	166012
KEGG_GLYCOSAMINOGLYCAN_BIOSYNTHESIS_CHONDROITIN_SULFATE	55454
KEGG_GLYCOSAMINOGLYCAN_BIOSYNTHESIS_CHONDROITIN_SULFATE	135152
KEGG_GLYCOSAMINOGLYCAN_BIOSYNTHESIS_CHONDROITIN_SULFATE	55790
KEGG_GLYCOSAMINOGLYCAN_BIOSYNTHESIS_CHONDROITIN_SULFATE	9469
KEGG_GLYCOSAMINOGLYCAN_BIOSYNTHESIS_CHONDROITIN_SULFATE	55501
KEGG_GLYCOSAMINOGLYCAN_BIOSYNTHESIS_CHONDROITIN_SULFATE	26229
KEGG_GLYCOSAMINOGLYCAN_BIOSYNTHESIS_KERATAN_SULFATE	9435
KEGG_GLYCOSAMINOGLYCAN_BIOSYNTHESIS_KERATAN_SULFATE	11041
KEGG_GLYCOSAMINOGLYCAN_BIOSYNTHESIS_KERATAN_SULFATE	10678
KEGG_GLYCOSAMINOGLYCAN_BIOSYNTHESIS_KERATAN_SULFATE	8534
KEGG_GLYCOSAMINOGLYCAN_BIOSYNTHESIS_KERATAN_SULFATE	2683
KEGG_GLYCOSAMINOGLYCAN_BIOSYNTHESIS_KERATAN_SULFATE	93010
KEGG_GLYCOSAMINOGLYCAN_BIOSYNTHESIS_KERATAN_SULFATE	6483
KEGG_GLYCOSAMINOGLYCAN_BIOSYNTHESIS_KERATAN_SULFATE	8703
KEGG_GLYCOSAMINOGLYCAN_BIOSYNTHESIS_KERATAN_SULFATE	6482
KEGG_GLYCOSAMINOGLYCAN_BIOSYNTHESIS_KERATAN_SULFATE	8704
KEGG_GLYCOSAMINOGLYCAN_BIOSYNTHESIS_KERATAN_SULFATE	8702
KEGG_GLYCOSAMINOGLYCAN_BIOSYNTHESIS_KERATAN_SULFATE	10164
KEGG_GLYCOSAMINOGLYCAN_BIOSYNTHESIS_KERATAN_SULFATE	6487
KEGG_GLYCOSAMINOGLYCAN_BIOSYNTHESIS_KERATAN_SULFATE	2530
KEGG_GLYCOSAMINOGLYCAN_BIOSYNTHESIS_KERATAN_SULFATE	4166
KEGG_GLYCOSAMINOGLYCAN_BIOSYNTHESIS_HEPARAN_SULFATE	222537
KEGG_GLYCOSAMINOGLYCAN_BIOSYNTHESIS_HEPARAN_SULFATE	2132
KEGG_GLYCOSAMINOGLYCAN_BIOSYNTHESIS_HEPARAN_SULFATE	2131
KEGG_GLYCOSAMINOGLYCAN_BIOSYNTHESIS_HEPARAN_SULFATE	9348
KEGG_GLYCOSAMINOGLYCAN_BIOSYNTHESIS_HEPARAN_SULFATE	64131
KEGG_GLYCOSAMINOGLYCAN_BIOSYNTHESIS_HEPARAN_SULFATE	64132
KEGG_GLYCOSAMINOGLYCAN_BIOSYNTHESIS_HEPARAN_SULFATE	27087
KEGG_GLYCOSAMINOGLYCAN_BIOSYNTHESIS_HEPARAN_SULFATE	3340
KEGG_GLYCOSAMINOGLYCAN_BIOSYNTHESIS_HEPARAN_SULFATE	26035
KEGG_GLYCOSAMINOGLYCAN_BIOSYNTHESIS_HEPARAN_SULFATE	9953
KEGG_GLYCOSAMINOGLYCAN_BIOSYNTHESIS_HEPARAN_SULFATE	9653
KEGG_GLYCOSAMINOGLYCAN_BIOSYNTHESIS_HEPARAN_SULFATE	90161
KEGG_GLYCOSAMINOGLYCAN_BIOSYNTHESIS_HEPARAN_SULFATE	26229
KEGG_GLYCOSAMINOGLYCAN_BIOSYNTHESIS_HEPARAN_SULFATE	9957
KEGG_GLYCOSAMINOGLYCAN_BIOSYNTHESIS_HEPARAN_SULFATE	126792
KEGG_GLYCOSAMINOGLYCAN_BIOSYNTHESIS_HEPARAN_SULFATE	9956
KEGG_GLYCOSAMINOGLYCAN_BIOSYNTHESIS_HEPARAN_SULFATE	9394
KEGG_GLYCOSAMINOGLYCAN_BIOSYNTHESIS_HEPARAN_SULFATE	9955
KEGG_GLYCOSAMINOGLYCAN_BIOSYNTHESIS_HEPARAN_SULFATE	8509
KEGG_GLYCOSAMINOGLYCAN_BIOSYNTHESIS_HEPARAN_SULFATE	64579
KEGG_GLYCOSAMINOGLYCAN_BIOSYNTHESIS_HEPARAN_SULFATE	266722
KEGG_GLYCOSAMINOGLYCAN_BIOSYNTHESIS_HEPARAN_SULFATE	11285
KEGG_GLYCOSAMINOGLYCAN_BIOSYNTHESIS_HEPARAN_SULFATE	135152
KEGG_GLYCOSAMINOGLYCAN_BIOSYNTHESIS_HEPARAN_SULFATE	2134
KEGG_GLYCOSAMINOGLYCAN_BIOSYNTHESIS_HEPARAN_SULFATE	2135
KEGG_GLYCOSAMINOGLYCAN_BIOSYNTHESIS_HEPARAN_SULFATE	2137
KEGG_GLYCEROLIPID_METABOLISM	129642
KEGG_GLYCEROLIPID_METABOLISM	57678
KEGG_GLYCEROLIPID_METABOLISM	9388
KEGG_GLYCEROLIPID_METABOLISM	8525
KEGG_GLYCEROLIPID_METABOLISM	8526
KEGG_GLYCEROLIPID_METABOLISM	8527
KEGG_GLYCEROLIPID_METABOLISM	160851
KEGG_GLYCEROLIPID_METABOLISM	154141
KEGG_GLYCEROLIPID_METABOLISM	2710
KEGG_GLYCEROLIPID_METABOLISM	84649
KEGG_GLYCEROLIPID_METABOLISM	2712
KEGG_GLYCEROLIPID_METABOLISM	2717
KEGG_GLYCEROLIPID_METABOLISM	501
KEGG_GLYCEROLIPID_METABOLISM	55750
KEGG_GLYCEROLIPID_METABOLISM	26007
KEGG_GLYCEROLIPID_METABOLISM	56894
KEGG_GLYCEROLIPID_METABOLISM	56895
KEGG_GLYCEROLIPID_METABOLISM	231
KEGG_GLYCEROLIPID_METABOLISM	5408
KEGG_GLYCEROLIPID_METABOLISM	5407
KEGG_GLYCEROLIPID_METABOLISM	5406
KEGG_GLYCEROLIPID_METABOLISM	8694
KEGG_GLYCEROLIPID_METABOLISM	132158
KEGG_GLYCEROLIPID_METABOLISM	4023
KEGG_GLYCEROLIPID_METABOLISM	219
KEGG_GLYCEROLIPID_METABOLISM	1609
KEGG_GLYCEROLIPID_METABOLISM	217
KEGG_GLYCEROLIPID_METABOLISM	1607
KEGG_GLYCEROLIPID_METABOLISM	1608
KEGG_GLYCEROLIPID_METABOLISM	10327
KEGG_GLYCEROLIPID_METABOLISM	1606
KEGG_GLYCEROLIPID_METABOLISM	8613
KEGG_GLYCEROLIPID_METABOLISM	3990
KEGG_GLYCEROLIPID_METABOLISM	9162
KEGG_GLYCEROLIPID_METABOLISM	253558
KEGG_GLYCEROLIPID_METABOLISM	84803
KEGG_GLYCEROLIPID_METABOLISM	11343
KEGG_GLYCEROLIPID_METABOLISM	137964
KEGG_GLYCEROLIPID_METABOLISM	223
KEGG_GLYCEROLIPID_METABOLISM	224
KEGG_GLYCEROLIPID_METABOLISM	80339
KEGG_GLYCEROLIPID_METABOLISM	8611
KEGG_GLYCEROLIPID_METABOLISM	8612
KEGG_GLYCEROLIPID_METABOLISM	10554
KEGG_GLYCEROLIPID_METABOLISM	10555
KEGG_GLYCEROLIPID_METABOLISM	1056
KEGG_GLYCEROLIPID_METABOLISM	150763
KEGG_GLYCEROLIPID_METABOLISM	8513
KEGG_INOSITOL_PHOSPHATE_METABOLISM	5330
KEGG_INOSITOL_PHOSPHATE_METABOLISM	23236
KEGG_INOSITOL_PHOSPHATE_METABOLISM	3628
KEGG_INOSITOL_PHOSPHATE_METABOLISM	253430
KEGG_INOSITOL_PHOSPHATE_METABOLISM	5333
KEGG_INOSITOL_PHOSPHATE_METABOLISM	5331
KEGG_INOSITOL_PHOSPHATE_METABOLISM	5332
KEGG_INOSITOL_PHOSPHATE_METABOLISM	55586
KEGG_INOSITOL_PHOSPHATE_METABOLISM	7167
KEGG_INOSITOL_PHOSPHATE_METABOLISM	3632
KEGG_INOSITOL_PHOSPHATE_METABOLISM	3633
KEGG_INOSITOL_PHOSPHATE_METABOLISM	3631
KEGG_INOSITOL_PHOSPHATE_METABOLISM	3636
KEGG_INOSITOL_PHOSPHATE_METABOLISM	8871
KEGG_INOSITOL_PHOSPHATE_METABOLISM	8396
KEGG_INOSITOL_PHOSPHATE_METABOLISM	113026
KEGG_INOSITOL_PHOSPHATE_METABOLISM	200576
KEGG_INOSITOL_PHOSPHATE_METABOLISM	3612
KEGG_INOSITOL_PHOSPHATE_METABOLISM	3613
KEGG_INOSITOL_PHOSPHATE_METABOLISM	8394
KEGG_INOSITOL_PHOSPHATE_METABOLISM	8395
KEGG_INOSITOL_PHOSPHATE_METABOLISM	51477
KEGG_INOSITOL_PHOSPHATE_METABOLISM	27124
KEGG_INOSITOL_PHOSPHATE_METABOLISM	51763
KEGG_INOSITOL_PHOSPHATE_METABOLISM	8867
KEGG_INOSITOL_PHOSPHATE_METABOLISM	84812
KEGG_INOSITOL_PHOSPHATE_METABOLISM	3706
KEGG_INOSITOL_PHOSPHATE_METABOLISM	3707
KEGG_INOSITOL_PHOSPHATE_METABOLISM	3705
KEGG_INOSITOL_PHOSPHATE_METABOLISM	10423
KEGG_INOSITOL_PHOSPHATE_METABOLISM	8821
KEGG_INOSITOL_PHOSPHATE_METABOLISM	51196
KEGG_INOSITOL_PHOSPHATE_METABOLISM	4329
KEGG_INOSITOL_PHOSPHATE_METABOLISM	23396
KEGG_INOSITOL_PHOSPHATE_METABOLISM	5289
KEGG_INOSITOL_PHOSPHATE_METABOLISM	5287
KEGG_INOSITOL_PHOSPHATE_METABOLISM	5288
KEGG_INOSITOL_PHOSPHATE_METABOLISM	5305
KEGG_INOSITOL_PHOSPHATE_METABOLISM	5286
KEGG_INOSITOL_PHOSPHATE_METABOLISM	5728
KEGG_INOSITOL_PHOSPHATE_METABOLISM	79837
KEGG_INOSITOL_PHOSPHATE_METABOLISM	9562
KEGG_INOSITOL_PHOSPHATE_METABOLISM	64768
KEGG_INOSITOL_PHOSPHATE_METABOLISM	5290
KEGG_INOSITOL_PHOSPHATE_METABOLISM	5291
KEGG_INOSITOL_PHOSPHATE_METABOLISM	5293
KEGG_INOSITOL_PHOSPHATE_METABOLISM	5335
KEGG_INOSITOL_PHOSPHATE_METABOLISM	5336
KEGG_INOSITOL_PHOSPHATE_METABOLISM	89869
KEGG_INOSITOL_PHOSPHATE_METABOLISM	5298
KEGG_INOSITOL_PHOSPHATE_METABOLISM	5294
KEGG_INOSITOL_PHOSPHATE_METABOLISM	56623
KEGG_INOSITOL_PHOSPHATE_METABOLISM	4952
KEGG_INOSITOL_PHOSPHATE_METABOLISM	5297
KEGG_GLYCOSYLPHOSPHATIDYLINOSITOL_GPI_ANCHOR_BIOSYNTHESIS	51227
KEGG_GLYCOSYLPHOSPHATIDYLINOSITOL_GPI_ANCHOR_BIOSYNTHESIS	284098
KEGG_GLYCOSYLPHOSPHATIDYLINOSITOL_GPI_ANCHOR_BIOSYNTHESIS	93183
KEGG_GLYCOSYLPHOSPHATIDYLINOSITOL_GPI_ANCHOR_BIOSYNTHESIS	23556
KEGG_GLYCOSYLPHOSPHATIDYLINOSITOL_GPI_ANCHOR_BIOSYNTHESIS	94005
KEGG_GLYCOSYLPHOSPHATIDYLINOSITOL_GPI_ANCHOR_BIOSYNTHESIS	5281
KEGG_GLYCOSYLPHOSPHATIDYLINOSITOL_GPI_ANCHOR_BIOSYNTHESIS	8818
KEGG_GLYCOSYLPHOSPHATIDYLINOSITOL_GPI_ANCHOR_BIOSYNTHESIS	9091
KEGG_GLYCOSYLPHOSPHATIDYLINOSITOL_GPI_ANCHOR_BIOSYNTHESIS	5283
KEGG_GLYCOSYLPHOSPHATIDYLINOSITOL_GPI_ANCHOR_BIOSYNTHESIS	84720
KEGG_GLYCOSYLPHOSPHATIDYLINOSITOL_GPI_ANCHOR_BIOSYNTHESIS	54872
KEGG_GLYCOSYLPHOSPHATIDYLINOSITOL_GPI_ANCHOR_BIOSYNTHESIS	80235
KEGG_GLYCOSYLPHOSPHATIDYLINOSITOL_GPI_ANCHOR_BIOSYNTHESIS	8733
KEGG_GLYCOSYLPHOSPHATIDYLINOSITOL_GPI_ANCHOR_BIOSYNTHESIS	128869
KEGG_GLYCOSYLPHOSPHATIDYLINOSITOL_GPI_ANCHOR_BIOSYNTHESIS	80055
KEGG_GLYCOSYLPHOSPHATIDYLINOSITOL_GPI_ANCHOR_BIOSYNTHESIS	51604
KEGG_GLYCOSYLPHOSPHATIDYLINOSITOL_GPI_ANCHOR_BIOSYNTHESIS	10026
KEGG_GLYCOSYLPHOSPHATIDYLINOSITOL_GPI_ANCHOR_BIOSYNTHESIS	84992
KEGG_GLYCOSYLPHOSPHATIDYLINOSITOL_GPI_ANCHOR_BIOSYNTHESIS	9487
KEGG_GLYCOSYLPHOSPHATIDYLINOSITOL_GPI_ANCHOR_BIOSYNTHESIS	55650
KEGG_GLYCOSYLPHOSPHATIDYLINOSITOL_GPI_ANCHOR_BIOSYNTHESIS	9488
KEGG_GLYCOSYLPHOSPHATIDYLINOSITOL_GPI_ANCHOR_BIOSYNTHESIS	54965
KEGG_GLYCOSYLPHOSPHATIDYLINOSITOL_GPI_ANCHOR_BIOSYNTHESIS	5277
KEGG_GLYCOSYLPHOSPHATIDYLINOSITOL_GPI_ANCHOR_BIOSYNTHESIS	2822
KEGG_GLYCOSYLPHOSPHATIDYLINOSITOL_GPI_ANCHOR_BIOSYNTHESIS	5279
KEGG_GLYCEROPHOSPHOLIPID_METABOLISM	10400
KEGG_GLYCEROPHOSPHOLIPID_METABOLISM	23659
KEGG_GLYCEROPHOSPHOLIPID_METABOLISM	2819
KEGG_GLYCEROPHOSPHOLIPID_METABOLISM	23171
KEGG_GLYCEROPHOSPHOLIPID_METABOLISM	9926
KEGG_GLYCEROPHOSPHOLIPID_METABOLISM	57678
KEGG_GLYCEROPHOSPHOLIPID_METABOLISM	129642
KEGG_GLYCEROPHOSPHOLIPID_METABOLISM	79143
KEGG_GLYCEROPHOSPHOLIPID_METABOLISM	1103
KEGG_GLYCEROPHOSPHOLIPID_METABOLISM	79888
KEGG_GLYCEROPHOSPHOLIPID_METABOLISM	9791
KEGG_GLYCEROPHOSPHOLIPID_METABOLISM	43
KEGG_GLYCEROPHOSPHOLIPID_METABOLISM	50487
KEGG_GLYCEROPHOSPHOLIPID_METABOLISM	8525
KEGG_GLYCEROPHOSPHOLIPID_METABOLISM	55500
KEGG_GLYCEROPHOSPHOLIPID_METABOLISM	8526
KEGG_GLYCEROPHOSPHOLIPID_METABOLISM	8527
KEGG_GLYCEROPHOSPHOLIPID_METABOLISM	5130
KEGG_GLYCEROPHOSPHOLIPID_METABOLISM	160851
KEGG_GLYCEROPHOSPHOLIPID_METABOLISM	8681
KEGG_GLYCEROPHOSPHOLIPID_METABOLISM	56994
KEGG_GLYCEROPHOSPHOLIPID_METABOLISM	154141
KEGG_GLYCEROPHOSPHOLIPID_METABOLISM	8398
KEGG_GLYCEROPHOSPHOLIPID_METABOLISM	30814
KEGG_GLYCEROPHOSPHOLIPID_METABOLISM	8399
KEGG_GLYCEROPHOSPHOLIPID_METABOLISM	10162
KEGG_GLYCEROPHOSPHOLIPID_METABOLISM	5320
KEGG_GLYCEROPHOSPHOLIPID_METABOLISM	55224
KEGG_GLYCEROPHOSPHOLIPID_METABOLISM	5321
KEGG_GLYCEROPHOSPHOLIPID_METABOLISM	5322
KEGG_GLYCEROPHOSPHOLIPID_METABOLISM	84647
KEGG_GLYCEROPHOSPHOLIPID_METABOLISM	81490
KEGG_GLYCEROPHOSPHOLIPID_METABOLISM	64600
KEGG_GLYCEROPHOSPHOLIPID_METABOLISM	5833
KEGG_GLYCEROPHOSPHOLIPID_METABOLISM	1040
KEGG_GLYCEROPHOSPHOLIPID_METABOLISM	56894
KEGG_GLYCEROPHOSPHOLIPID_METABOLISM	56895
KEGG_GLYCEROPHOSPHOLIPID_METABOLISM	9489
KEGG_GLYCEROPHOSPHOLIPID_METABOLISM	10434
KEGG_GLYCEROPHOSPHOLIPID_METABOLISM	5319
KEGG_GLYCEROPHOSPHOLIPID_METABOLISM	56985
KEGG_GLYCEROPHOSPHOLIPID_METABOLISM	10423
KEGG_GLYCEROPHOSPHOLIPID_METABOLISM	1609
KEGG_GLYCEROPHOSPHOLIPID_METABOLISM	8760
KEGG_GLYCEROPHOSPHOLIPID_METABOLISM	1607
KEGG_GLYCEROPHOSPHOLIPID_METABOLISM	1608
KEGG_GLYCEROPHOSPHOLIPID_METABOLISM	8613
KEGG_GLYCEROPHOSPHOLIPID_METABOLISM	1606
KEGG_GLYCEROPHOSPHOLIPID_METABOLISM	9162
KEGG_GLYCEROPHOSPHOLIPID_METABOLISM	162466
KEGG_GLYCEROPHOSPHOLIPID_METABOLISM	253558
KEGG_GLYCEROPHOSPHOLIPID_METABOLISM	6901
KEGG_GLYCEROPHOSPHOLIPID_METABOLISM	84803
KEGG_GLYCEROPHOSPHOLIPID_METABOLISM	8443
KEGG_GLYCEROPHOSPHOLIPID_METABOLISM	254531
KEGG_GLYCEROPHOSPHOLIPID_METABOLISM	137964
KEGG_GLYCEROPHOSPHOLIPID_METABOLISM	1119
KEGG_GLYCEROPHOSPHOLIPID_METABOLISM	8611
KEGG_GLYCEROPHOSPHOLIPID_METABOLISM	8612
KEGG_GLYCEROPHOSPHOLIPID_METABOLISM	11313
KEGG_GLYCEROPHOSPHOLIPID_METABOLISM	10554
KEGG_GLYCEROPHOSPHOLIPID_METABOLISM	26279
KEGG_GLYCEROPHOSPHOLIPID_METABOLISM	54947
KEGG_GLYCEROPHOSPHOLIPID_METABOLISM	81579
KEGG_GLYCEROPHOSPHOLIPID_METABOLISM	10555
KEGG_GLYCEROPHOSPHOLIPID_METABOLISM	5337
KEGG_GLYCEROPHOSPHOLIPID_METABOLISM	1120
KEGG_GLYCEROPHOSPHOLIPID_METABOLISM	23761
KEGG_GLYCEROPHOSPHOLIPID_METABOLISM	5338
KEGG_GLYCEROPHOSPHOLIPID_METABOLISM	9468
KEGG_GLYCEROPHOSPHOLIPID_METABOLISM	150763
KEGG_GLYCEROPHOSPHOLIPID_METABOLISM	3931
KEGG_GLYCEROPHOSPHOLIPID_METABOLISM	54675
KEGG_GLYCEROPHOSPHOLIPID_METABOLISM	2820
KEGG_ETHER_LIPID_METABOLISM	5168
KEGG_ETHER_LIPID_METABOLISM	5048
KEGG_ETHER_LIPID_METABOLISM	8613
KEGG_ETHER_LIPID_METABOLISM	79888
KEGG_ETHER_LIPID_METABOLISM	50487
KEGG_ETHER_LIPID_METABOLISM	133121
KEGG_ETHER_LIPID_METABOLISM	254531
KEGG_ETHER_LIPID_METABOLISM	8681
KEGG_ETHER_LIPID_METABOLISM	56994
KEGG_ETHER_LIPID_METABOLISM	8540
KEGG_ETHER_LIPID_METABOLISM	8398
KEGG_ETHER_LIPID_METABOLISM	5050
KEGG_ETHER_LIPID_METABOLISM	30814
KEGG_ETHER_LIPID_METABOLISM	8399
KEGG_ETHER_LIPID_METABOLISM	5051
KEGG_ETHER_LIPID_METABOLISM	5320
KEGG_ETHER_LIPID_METABOLISM	5321
KEGG_ETHER_LIPID_METABOLISM	5322
KEGG_ETHER_LIPID_METABOLISM	84647
KEGG_ETHER_LIPID_METABOLISM	7941
KEGG_ETHER_LIPID_METABOLISM	64600
KEGG_ETHER_LIPID_METABOLISM	8611
KEGG_ETHER_LIPID_METABOLISM	8612
KEGG_ETHER_LIPID_METABOLISM	5049
KEGG_ETHER_LIPID_METABOLISM	26279
KEGG_ETHER_LIPID_METABOLISM	54947
KEGG_ETHER_LIPID_METABOLISM	5337
KEGG_ETHER_LIPID_METABOLISM	81579
KEGG_ETHER_LIPID_METABOLISM	5338
KEGG_ETHER_LIPID_METABOLISM	5319
KEGG_ARACHIDONIC_ACID_METABOLISM	2053
KEGG_ARACHIDONIC_ACID_METABOLISM	1571
KEGG_ARACHIDONIC_ACID_METABOLISM	240
KEGG_ARACHIDONIC_ACID_METABOLISM	1579
KEGG_ARACHIDONIC_ACID_METABOLISM	1573
KEGG_ARACHIDONIC_ACID_METABOLISM	2678
KEGG_ARACHIDONIC_ACID_METABOLISM	50487
KEGG_ARACHIDONIC_ACID_METABOLISM	8644
KEGG_ARACHIDONIC_ACID_METABOLISM	5740
KEGG_ARACHIDONIC_ACID_METABOLISM	242
KEGG_ARACHIDONIC_ACID_METABOLISM	8529
KEGG_ARACHIDONIC_ACID_METABOLISM	1562
KEGG_ARACHIDONIC_ACID_METABOLISM	80142
KEGG_ARACHIDONIC_ACID_METABOLISM	247
KEGG_ARACHIDONIC_ACID_METABOLISM	246
KEGG_ARACHIDONIC_ACID_METABOLISM	8681
KEGG_ARACHIDONIC_ACID_METABOLISM	8398
KEGG_ARACHIDONIC_ACID_METABOLISM	30814
KEGG_ARACHIDONIC_ACID_METABOLISM	8399
KEGG_ARACHIDONIC_ACID_METABOLISM	5320
KEGG_ARACHIDONIC_ACID_METABOLISM	5321
KEGG_ARACHIDONIC_ACID_METABOLISM	5322
KEGG_ARACHIDONIC_ACID_METABOLISM	5743
KEGG_ARACHIDONIC_ACID_METABOLISM	84647
KEGG_ARACHIDONIC_ACID_METABOLISM	5742
KEGG_ARACHIDONIC_ACID_METABOLISM	64600
KEGG_ARACHIDONIC_ACID_METABOLISM	239
KEGG_ARACHIDONIC_ACID_METABOLISM	1559
KEGG_ARACHIDONIC_ACID_METABOLISM	2882
KEGG_ARACHIDONIC_ACID_METABOLISM	1557
KEGG_ARACHIDONIC_ACID_METABOLISM	1558
KEGG_ARACHIDONIC_ACID_METABOLISM	873
KEGG_ARACHIDONIC_ACID_METABOLISM	1555
KEGG_ARACHIDONIC_ACID_METABOLISM	874
KEGG_ARACHIDONIC_ACID_METABOLISM	113612
KEGG_ARACHIDONIC_ACID_METABOLISM	5319
KEGG_ARACHIDONIC_ACID_METABOLISM	4048
KEGG_ARACHIDONIC_ACID_METABOLISM	9536
KEGG_ARACHIDONIC_ACID_METABOLISM	2880
KEGG_ARACHIDONIC_ACID_METABOLISM	2876
KEGG_ARACHIDONIC_ACID_METABOLISM	284541
KEGG_ARACHIDONIC_ACID_METABOLISM	2877
KEGG_ARACHIDONIC_ACID_METABOLISM	2878
KEGG_ARACHIDONIC_ACID_METABOLISM	2879
KEGG_ARACHIDONIC_ACID_METABOLISM	4051
KEGG_ARACHIDONIC_ACID_METABOLISM	4056
KEGG_ARACHIDONIC_ACID_METABOLISM	124975
KEGG_ARACHIDONIC_ACID_METABOLISM	2686
KEGG_ARACHIDONIC_ACID_METABOLISM	2687
KEGG_ARACHIDONIC_ACID_METABOLISM	27306
KEGG_ARACHIDONIC_ACID_METABOLISM	5730
KEGG_ARACHIDONIC_ACID_METABOLISM	26279
KEGG_ARACHIDONIC_ACID_METABOLISM	81579
KEGG_ARACHIDONIC_ACID_METABOLISM	6916
KEGG_LINOLEIC_ACID_METABOLISM	1571
KEGG_LINOLEIC_ACID_METABOLISM	1577
KEGG_LINOLEIC_ACID_METABOLISM	1573
KEGG_LINOLEIC_ACID_METABOLISM	1576
KEGG_LINOLEIC_ACID_METABOLISM	50487
KEGG_LINOLEIC_ACID_METABOLISM	57016
KEGG_LINOLEIC_ACID_METABOLISM	1562
KEGG_LINOLEIC_ACID_METABOLISM	1544
KEGG_LINOLEIC_ACID_METABOLISM	246
KEGG_LINOLEIC_ACID_METABOLISM	8681
KEGG_LINOLEIC_ACID_METABOLISM	8398
KEGG_LINOLEIC_ACID_METABOLISM	30814
KEGG_LINOLEIC_ACID_METABOLISM	8399
KEGG_LINOLEIC_ACID_METABOLISM	5320
KEGG_LINOLEIC_ACID_METABOLISM	5321
KEGG_LINOLEIC_ACID_METABOLISM	64816
KEGG_LINOLEIC_ACID_METABOLISM	5322
KEGG_LINOLEIC_ACID_METABOLISM	84647
KEGG_LINOLEIC_ACID_METABOLISM	64600
KEGG_LINOLEIC_ACID_METABOLISM	26279
KEGG_LINOLEIC_ACID_METABOLISM	1559
KEGG_LINOLEIC_ACID_METABOLISM	81579
KEGG_LINOLEIC_ACID_METABOLISM	1557
KEGG_LINOLEIC_ACID_METABOLISM	1558
KEGG_LINOLEIC_ACID_METABOLISM	1551
KEGG_LINOLEIC_ACID_METABOLISM	5319
KEGG_ALPHA_LINOLENIC_ACID_METABOLISM	8681
KEGG_ALPHA_LINOLENIC_ACID_METABOLISM	8398
KEGG_ALPHA_LINOLENIC_ACID_METABOLISM	30814
KEGG_ALPHA_LINOLENIC_ACID_METABOLISM	8399
KEGG_ALPHA_LINOLENIC_ACID_METABOLISM	5320
KEGG_ALPHA_LINOLENIC_ACID_METABOLISM	5321
KEGG_ALPHA_LINOLENIC_ACID_METABOLISM	5322
KEGG_ALPHA_LINOLENIC_ACID_METABOLISM	84647
KEGG_ALPHA_LINOLENIC_ACID_METABOLISM	64600
KEGG_ALPHA_LINOLENIC_ACID_METABOLISM	9415
KEGG_ALPHA_LINOLENIC_ACID_METABOLISM	8310
KEGG_ALPHA_LINOLENIC_ACID_METABOLISM	26279
KEGG_ALPHA_LINOLENIC_ACID_METABOLISM	50487
KEGG_ALPHA_LINOLENIC_ACID_METABOLISM	81579
KEGG_ALPHA_LINOLENIC_ACID_METABOLISM	51
KEGG_ALPHA_LINOLENIC_ACID_METABOLISM	5319
KEGG_SPHINGOLIPID_METABOLISM	9514
KEGG_SPHINGOLIPID_METABOLISM	130367
KEGG_SPHINGOLIPID_METABOLISM	2720
KEGG_SPHINGOLIPID_METABOLISM	2581
KEGG_SPHINGOLIPID_METABOLISM	166929
KEGG_SPHINGOLIPID_METABOLISM	2629
KEGG_SPHINGOLIPID_METABOLISM	56848
KEGG_SPHINGOLIPID_METABOLISM	4759
KEGG_SPHINGOLIPID_METABOLISM	8613
KEGG_SPHINGOLIPID_METABOLISM	4758
KEGG_SPHINGOLIPID_METABOLISM	7357
KEGG_SPHINGOLIPID_METABOLISM	123099
KEGG_SPHINGOLIPID_METABOLISM	410
KEGG_SPHINGOLIPID_METABOLISM	8877
KEGG_SPHINGOLIPID_METABOLISM	8879
KEGG_SPHINGOLIPID_METABOLISM	10825
KEGG_SPHINGOLIPID_METABOLISM	55627
KEGG_SPHINGOLIPID_METABOLISM	259230
KEGG_SPHINGOLIPID_METABOLISM	55331
KEGG_SPHINGOLIPID_METABOLISM	64781
KEGG_SPHINGOLIPID_METABOLISM	6610
KEGG_SPHINGOLIPID_METABOLISM	339221
KEGG_SPHINGOLIPID_METABOLISM	8560
KEGG_SPHINGOLIPID_METABOLISM	81537
KEGG_SPHINGOLIPID_METABOLISM	129807
KEGG_SPHINGOLIPID_METABOLISM	2717
KEGG_SPHINGOLIPID_METABOLISM	125981
KEGG_SPHINGOLIPID_METABOLISM	8611
KEGG_SPHINGOLIPID_METABOLISM	427
KEGG_SPHINGOLIPID_METABOLISM	8612
KEGG_SPHINGOLIPID_METABOLISM	6609
KEGG_SPHINGOLIPID_METABOLISM	9331
KEGG_SPHINGOLIPID_METABOLISM	9517
KEGG_SPHINGOLIPID_METABOLISM	10558
KEGG_SPHINGOLIPID_METABOLISM	55512
KEGG_SPHINGOLIPID_METABOLISM	2531
KEGG_SPHINGOLIPID_METABOLISM	7368
KEGG_GLYCOSPHINGOLIPID_BIOSYNTHESIS_LACTO_AND_NEOLACTO_SERIES	79369
KEGG_GLYCOSPHINGOLIPID_BIOSYNTHESIS_LACTO_AND_NEOLACTO_SERIES	10678
KEGG_GLYCOSPHINGOLIPID_BIOSYNTHESIS_LACTO_AND_NEOLACTO_SERIES	10402
KEGG_GLYCOSPHINGOLIPID_BIOSYNTHESIS_LACTO_AND_NEOLACTO_SERIES	2683
KEGG_GLYCOSPHINGOLIPID_BIOSYNTHESIS_LACTO_AND_NEOLACTO_SERIES	84002
KEGG_GLYCOSPHINGOLIPID_BIOSYNTHESIS_LACTO_AND_NEOLACTO_SERIES	10690
KEGG_GLYCOSPHINGOLIPID_BIOSYNTHESIS_LACTO_AND_NEOLACTO_SERIES	2529
KEGG_GLYCOSPHINGOLIPID_BIOSYNTHESIS_LACTO_AND_NEOLACTO_SERIES	2528
KEGG_GLYCOSPHINGOLIPID_BIOSYNTHESIS_LACTO_AND_NEOLACTO_SERIES	2527
KEGG_GLYCOSPHINGOLIPID_BIOSYNTHESIS_LACTO_AND_NEOLACTO_SERIES	2526
KEGG_GLYCOSPHINGOLIPID_BIOSYNTHESIS_LACTO_AND_NEOLACTO_SERIES	2525
KEGG_GLYCOSPHINGOLIPID_BIOSYNTHESIS_LACTO_AND_NEOLACTO_SERIES	2524
KEGG_GLYCOSPHINGOLIPID_BIOSYNTHESIS_LACTO_AND_NEOLACTO_SERIES	2523
KEGG_GLYCOSPHINGOLIPID_BIOSYNTHESIS_LACTO_AND_NEOLACTO_SERIES	11041
KEGG_GLYCOSPHINGOLIPID_BIOSYNTHESIS_LACTO_AND_NEOLACTO_SERIES	2651
KEGG_GLYCOSPHINGOLIPID_BIOSYNTHESIS_LACTO_AND_NEOLACTO_SERIES	10331
KEGG_GLYCOSPHINGOLIPID_BIOSYNTHESIS_LACTO_AND_NEOLACTO_SERIES	10317
KEGG_GLYCOSPHINGOLIPID_BIOSYNTHESIS_LACTO_AND_NEOLACTO_SERIES	28
KEGG_GLYCOSPHINGOLIPID_BIOSYNTHESIS_LACTO_AND_NEOLACTO_SERIES	8703
KEGG_GLYCOSPHINGOLIPID_BIOSYNTHESIS_LACTO_AND_NEOLACTO_SERIES	8704
KEGG_GLYCOSPHINGOLIPID_BIOSYNTHESIS_LACTO_AND_NEOLACTO_SERIES	6484
KEGG_GLYCOSPHINGOLIPID_BIOSYNTHESIS_LACTO_AND_NEOLACTO_SERIES	8702
KEGG_GLYCOSPHINGOLIPID_BIOSYNTHESIS_LACTO_AND_NEOLACTO_SERIES	6487
KEGG_GLYCOSPHINGOLIPID_BIOSYNTHESIS_LACTO_AND_NEOLACTO_SERIES	8707
KEGG_GLYCOSPHINGOLIPID_BIOSYNTHESIS_LACTO_AND_NEOLACTO_SERIES	8708
KEGG_GLYCOSPHINGOLIPID_BIOSYNTHESIS_LACTO_AND_NEOLACTO_SERIES	6489
KEGG_GLYCOSPHINGOLIPID_BIOSYNTHESIS_GLOBO_SERIES	53947
KEGG_GLYCOSPHINGOLIPID_BIOSYNTHESIS_GLOBO_SERIES	10317
KEGG_GLYCOSPHINGOLIPID_BIOSYNTHESIS_GLOBO_SERIES	2717
KEGG_GLYCOSPHINGOLIPID_BIOSYNTHESIS_GLOBO_SERIES	10690
KEGG_GLYCOSPHINGOLIPID_BIOSYNTHESIS_GLOBO_SERIES	6483
KEGG_GLYCOSPHINGOLIPID_BIOSYNTHESIS_GLOBO_SERIES	26301
KEGG_GLYCOSPHINGOLIPID_BIOSYNTHESIS_GLOBO_SERIES	6482
KEGG_GLYCOSPHINGOLIPID_BIOSYNTHESIS_GLOBO_SERIES	2524
KEGG_GLYCOSPHINGOLIPID_BIOSYNTHESIS_GLOBO_SERIES	2523
KEGG_GLYCOSPHINGOLIPID_BIOSYNTHESIS_GLOBO_SERIES	3074
KEGG_GLYCOSPHINGOLIPID_BIOSYNTHESIS_GLOBO_SERIES	4668
KEGG_GLYCOSPHINGOLIPID_BIOSYNTHESIS_GLOBO_SERIES	6489
KEGG_GLYCOSPHINGOLIPID_BIOSYNTHESIS_GLOBO_SERIES	8706
KEGG_GLYCOSPHINGOLIPID_BIOSYNTHESIS_GLOBO_SERIES	3073
KEGG_GLYCOSPHINGOLIPID_BIOSYNTHESIS_GANGLIO_SERIES	27090
KEGG_GLYCOSPHINGOLIPID_BIOSYNTHESIS_GANGLIO_SERIES	256435
KEGG_GLYCOSPHINGOLIPID_BIOSYNTHESIS_GANGLIO_SERIES	30815
KEGG_GLYCOSPHINGOLIPID_BIOSYNTHESIS_GANGLIO_SERIES	2583
KEGG_GLYCOSPHINGOLIPID_BIOSYNTHESIS_GANGLIO_SERIES	2720
KEGG_GLYCOSPHINGOLIPID_BIOSYNTHESIS_GANGLIO_SERIES	81849
KEGG_GLYCOSPHINGOLIPID_BIOSYNTHESIS_GANGLIO_SERIES	9197
KEGG_GLYCOSPHINGOLIPID_BIOSYNTHESIS_GANGLIO_SERIES	8869
KEGG_GLYCOSPHINGOLIPID_BIOSYNTHESIS_GANGLIO_SERIES	6483
KEGG_GLYCOSPHINGOLIPID_BIOSYNTHESIS_GANGLIO_SERIES	6482
KEGG_GLYCOSPHINGOLIPID_BIOSYNTHESIS_GANGLIO_SERIES	3074
KEGG_GLYCOSPHINGOLIPID_BIOSYNTHESIS_GANGLIO_SERIES	6489
KEGG_GLYCOSPHINGOLIPID_BIOSYNTHESIS_GANGLIO_SERIES	8705
KEGG_GLYCOSPHINGOLIPID_BIOSYNTHESIS_GANGLIO_SERIES	29906
KEGG_GLYCOSPHINGOLIPID_BIOSYNTHESIS_GANGLIO_SERIES	3073
KEGG_PYRUVATE_METABOLISM	55902
KEGG_PYRUVATE_METABOLISM	5106
KEGG_PYRUVATE_METABOLISM	10873
KEGG_PYRUVATE_METABOLISM	9380
KEGG_PYRUVATE_METABOLISM	5162
KEGG_PYRUVATE_METABOLISM	5105
KEGG_PYRUVATE_METABOLISM	5160
KEGG_PYRUVATE_METABOLISM	219
KEGG_PYRUVATE_METABOLISM	5161
KEGG_PYRUVATE_METABOLISM	3029
KEGG_PYRUVATE_METABOLISM	217
KEGG_PYRUVATE_METABOLISM	39
KEGG_PYRUVATE_METABOLISM	38
KEGG_PYRUVATE_METABOLISM	3948
KEGG_PYRUVATE_METABOLISM	197257
KEGG_PYRUVATE_METABOLISM	84264
KEGG_PYRUVATE_METABOLISM	84532
KEGG_PYRUVATE_METABOLISM	3945
KEGG_PYRUVATE_METABOLISM	98
KEGG_PYRUVATE_METABOLISM	4199
KEGG_PYRUVATE_METABOLISM	97
KEGG_PYRUVATE_METABOLISM	223
KEGG_PYRUVATE_METABOLISM	224
KEGG_PYRUVATE_METABOLISM	4200
KEGG_PYRUVATE_METABOLISM	1738
KEGG_PYRUVATE_METABOLISM	4191
KEGG_PYRUVATE_METABOLISM	1737
KEGG_PYRUVATE_METABOLISM	4190
KEGG_PYRUVATE_METABOLISM	501
KEGG_PYRUVATE_METABOLISM	5091
KEGG_PYRUVATE_METABOLISM	2739
KEGG_PYRUVATE_METABOLISM	92483
KEGG_PYRUVATE_METABOLISM	3939
KEGG_PYRUVATE_METABOLISM	32
KEGG_PYRUVATE_METABOLISM	31
KEGG_PYRUVATE_METABOLISM	5313
KEGG_PYRUVATE_METABOLISM	231
KEGG_PYRUVATE_METABOLISM	160287
KEGG_PYRUVATE_METABOLISM	5315
KEGG_PYRUVATE_METABOLISM	134526
KEGG_GLYOXYLATE_AND_DICARBOXYLATE_METABOLISM	48
KEGG_GLYOXYLATE_AND_DICARBOXYLATE_METABOLISM	132158
KEGG_GLYOXYLATE_AND_DICARBOXYLATE_METABOLISM	10797
KEGG_GLYOXYLATE_AND_DICARBOXYLATE_METABOLISM	9380
KEGG_GLYOXYLATE_AND_DICARBOXYLATE_METABOLISM	1431
KEGG_GLYOXYLATE_AND_DICARBOXYLATE_METABOLISM	54363
KEGG_GLYOXYLATE_AND_DICARBOXYLATE_METABOLISM	4191
KEGG_GLYOXYLATE_AND_DICARBOXYLATE_METABOLISM	4190
KEGG_GLYOXYLATE_AND_DICARBOXYLATE_METABOLISM	441024
KEGG_GLYOXYLATE_AND_DICARBOXYLATE_METABOLISM	283871
KEGG_GLYOXYLATE_AND_DICARBOXYLATE_METABOLISM	25902
KEGG_GLYOXYLATE_AND_DICARBOXYLATE_METABOLISM	4522
KEGG_GLYOXYLATE_AND_DICARBOXYLATE_METABOLISM	51179
KEGG_GLYOXYLATE_AND_DICARBOXYLATE_METABOLISM	125061
KEGG_GLYOXYLATE_AND_DICARBOXYLATE_METABOLISM	81888
KEGG_GLYOXYLATE_AND_DICARBOXYLATE_METABOLISM	50
KEGG_PROPANOATE_METABOLISM	55902
KEGG_PROPANOATE_METABOLISM	219
KEGG_PROPANOATE_METABOLISM	18
KEGG_PROPANOATE_METABOLISM	217
KEGG_PROPANOATE_METABOLISM	34
KEGG_PROPANOATE_METABOLISM	39
KEGG_PROPANOATE_METABOLISM	38
KEGG_PROPANOATE_METABOLISM	3948
KEGG_PROPANOATE_METABOLISM	84693
KEGG_PROPANOATE_METABOLISM	3030
KEGG_PROPANOATE_METABOLISM	4329
KEGG_PROPANOATE_METABOLISM	84532
KEGG_PROPANOATE_METABOLISM	3945
KEGG_PROPANOATE_METABOLISM	1892
KEGG_PROPANOATE_METABOLISM	223
KEGG_PROPANOATE_METABOLISM	224
KEGG_PROPANOATE_METABOLISM	5096
KEGG_PROPANOATE_METABOLISM	26275
KEGG_PROPANOATE_METABOLISM	1962
KEGG_PROPANOATE_METABOLISM	5095
KEGG_PROPANOATE_METABOLISM	501
KEGG_PROPANOATE_METABOLISM	92483
KEGG_PROPANOATE_METABOLISM	8802
KEGG_PROPANOATE_METABOLISM	23417
KEGG_PROPANOATE_METABOLISM	3939
KEGG_PROPANOATE_METABOLISM	8803
KEGG_PROPANOATE_METABOLISM	32
KEGG_PROPANOATE_METABOLISM	4594
KEGG_PROPANOATE_METABOLISM	8801
KEGG_PROPANOATE_METABOLISM	31
KEGG_PROPANOATE_METABOLISM	79611
KEGG_PROPANOATE_METABOLISM	160287
KEGG_BUTANOATE_METABOLISM	65985
KEGG_BUTANOATE_METABOLISM	5162
KEGG_BUTANOATE_METABOLISM	219
KEGG_BUTANOATE_METABOLISM	35
KEGG_BUTANOATE_METABOLISM	5160
KEGG_BUTANOATE_METABOLISM	18
KEGG_BUTANOATE_METABOLISM	5161
KEGG_BUTANOATE_METABOLISM	217
KEGG_BUTANOATE_METABOLISM	39
KEGG_BUTANOATE_METABOLISM	38
KEGG_BUTANOATE_METABOLISM	5019
KEGG_BUTANOATE_METABOLISM	3033
KEGG_BUTANOATE_METABOLISM	622
KEGG_BUTANOATE_METABOLISM	3030
KEGG_BUTANOATE_METABOLISM	116285
KEGG_BUTANOATE_METABOLISM	3155
KEGG_BUTANOATE_METABOLISM	57016
KEGG_BUTANOATE_METABOLISM	1892
KEGG_BUTANOATE_METABOLISM	223
KEGG_BUTANOATE_METABOLISM	2571
KEGG_BUTANOATE_METABOLISM	224
KEGG_BUTANOATE_METABOLISM	6296
KEGG_BUTANOATE_METABOLISM	2572
KEGG_BUTANOATE_METABOLISM	3158
KEGG_BUTANOATE_METABOLISM	1962
KEGG_BUTANOATE_METABOLISM	3157
KEGG_BUTANOATE_METABOLISM	501
KEGG_BUTANOATE_METABOLISM	7915
KEGG_BUTANOATE_METABOLISM	56898
KEGG_BUTANOATE_METABOLISM	64064
KEGG_BUTANOATE_METABOLISM	123876
KEGG_BUTANOATE_METABOLISM	54988
KEGG_BUTANOATE_METABOLISM	79944
KEGG_ONE_CARBON_POOL_BY_FOLATE	10797
KEGG_ONE_CARBON_POOL_BY_FOLATE	2618
KEGG_ONE_CARBON_POOL_BY_FOLATE	7298
KEGG_ONE_CARBON_POOL_BY_FOLATE	10841
KEGG_ONE_CARBON_POOL_BY_FOLATE	10840
[truncated: 61,543 more rows]
