# Supplementary material for: The Pathway Coexpression Network: Revealing pathway relationships
Source: PLoS Comput Biol. 2018 Mar 19;14(3):e1006042. doi: 10.1371/journal.pcbi.1006042 (PMC5875878; doi:10.1371/journal.pcbi.1006042)
Supplement: S3 Table — (XLSX) [file pcbi.1006042.s006.xlsx]

## Sheet: Cell Cycle and DNA Replication 
Pathway.A	Pathway.B	Overlap.Coefficient	PathCor	p.value	p.Adjust
KEGG_CELL_CYCLE	KEGG_DNA_REPLICATION	0.194444	0.334303	8.03781e-59	1.61287e-56
REACTOME_CELL_CYCLE	KEGG_DNA_REPLICATION	0.777778	0.184106	1.27837e-07	2.80708e-06
REACTOME_CELL_CYCLE	KEGG_CELL_CYCLE	0.739837	0.176946	5.73658e-12	1.69336e-10
REACTOME_DNA_REPLICATION	KEGG_DNA_REPLICATION	0.777778	0.248099	2.53753e-16	9.63126e-15
REACTOME_DNA_REPLICATION	KEGG_CELL_CYCLE	0.308943	0.269287	1.62847e-34	1.40774e-32
REACTOME_DNA_REPLICATION	REACTOME_CELL_CYCLE	1	0.291969	7.54191e-24	4.14676e-22

## Sheet: Sheet8
Pathway.A	Pathway.B	OR	p.value	p.Adjust	Overlap.Coefficient
KEGG_CELL_CYCLE	KEGG_DNA_REPLICATION	40.8644	2.13498e-09	4.90872e-08	0.194444
REACTOME_CELL_CYCLE	KEGG_DNA_REPLICATION	194.648	6.70521e-42	1.49646e-39	0.777778
REACTOME_CELL_CYCLE	KEGG_CELL_CYCLE	191.591	5.97175e-133	1.52978e-129	0.739837
REACTOME_DNA_REPLICATION	KEGG_DNA_REPLICATION	428.937	5.64331e-51	1.73598e-48	0.777778
REACTOME_DNA_REPLICATION	KEGG_CELL_CYCLE	58.991	6.86422e-48	1.91071e-45	0.308943
REACTOME_DNA_REPLICATION	REACTOME_CELL_CYCLE	Inf	0	0	1

## Sheet: Wnt Signaling (Correlation)
Pathway.A	Pathway.B	Overlap.Coefficient	PathCor	p.value	p.Adjust
BIOCARTA_WNT_PATHWAY	KEGG_WNT_SIGNALING_PATHWAY	0.846154	0.196162	1.38499e-08	3.26873e-07
PID_WNT_NONCANONICAL_PATHWAY	KEGG_WNT_SIGNALING_PATHWAY	0.625	0.226522	1.15282e-16	4.45988e-15
PID_WNT_NONCANONICAL_PATHWAY	BIOCARTA_WNT_PATHWAY	0.192308	0.251242	3.62586e-06	7.07908e-05
PID_WNT_SIGNALING_PATHWAY	KEGG_WNT_SIGNALING_PATHWAY	0.703704	0.175966	2.34982e-07	5.05225e-06
PID_WNT_SIGNALING_PATHWAY	BIOCARTA_WNT_PATHWAY	0.115385	0.152289	0.000612856	0.00972879
PID_WNT_SIGNALING_PATHWAY	PID_WNT_NONCANONICAL_PATHWAY	0.259259	0.0921049	2.37861e-05	0.000433108
PID_WNT_CANONICAL_PATHWAY	KEGG_WNT_SIGNALING_PATHWAY	0.578947	0.148023	0.000981414	0.015244
PID_WNT_CANONICAL_PATHWAY	BIOCARTA_WNT_PATHWAY	0.263158	0.215556	5.7163e-12	1.68771e-10

## Sheet: Wnt Signaling (Overlap)
Pathway.A	Pathway.B	OR	p.value	p.Adjust	Overlap.Coefficient
BIOCARTA_WNT_PATHWAY	KEGG_WNT_SIGNALING_PATHWAY	861.544	3.87915e-44	9.47315e-42	0.846154
PID_WNT_NONCANONICAL_PATHWAY	KEGG_WNT_SIGNALING_PATHWAY	256.686	1.36821e-35	2.35666e-33	0.625
PID_WNT_NONCANONICAL_PATHWAY	BIOCARTA_WNT_PATHWAY	172.572	5.05935e-10	1.25105e-08	0.192308
PID_WNT_SIGNALING_PATHWAY	KEGG_WNT_SIGNALING_PATHWAY	363.334	2.13364e-35	3.64242e-33	0.703704
PID_WNT_SIGNALING_PATHWAY	BIOCARTA_WNT_PATHWAY	107.1	5.72818e-06	8.43689e-05	0.115385
PID_WNT_SIGNALING_PATHWAY	PID_WNT_NONCANONICAL_PATHWAY	276.314	1.22166e-14	4.8663e-13	0.259259
PID_WNT_CANONICAL_PATHWAY	KEGG_WNT_SIGNALING_PATHWAY	197.944	1.82044e-19	1.12509e-17	0.578947
PID_WNT_CANONICAL_PATHWAY	BIOCARTA_WNT_PATHWAY	332.854	2.95514e-11	8.36926e-10	0.263158
PID_WNT_CANONICAL_PATHWAY	PID_WNT_NONCANONICAL_PATHWAY	186.97	2.1259e-08	4.35107e-07	0.210526
PID_WNT_CANONICAL_PATHWAY	PID_WNT_SIGNALING_PATHWAY	92.7222	0.000300837	0.00332128	0.105263
REACTOME_SIGNALING_BY_WNT	KEGG_WNT_SIGNALING_PATHWAY	60.7742	3.03858e-24	2.70902e-22	0.285714
REACTOME_SIGNALING_BY_WNT	BIOCARTA_WNT_PATHWAY	129.401	1.45088e-12	4.70953e-11	0.269231
REACTOME_SIGNALING_BY_WNT	PID_WNT_CANONICAL_PATHWAY	88.9791	3.45596e-07	6.08141e-06	0.210526

## Sheet: Mitotic Prometaphase (Correlati
Pathway.A	Pathway.B	Overlap.Coefficient	PathCor	p.value	p.Adjust
REACTOME_MITOTIC_PROMETAPHASE	REACTOME_ACTIVATION_OF_THE_PRE_REPLICATIVE_COMPLEX	0	0.669681	0	0
REACTOME_MITOTIC_PROMETAPHASE	REACTOME_E2F_ENABLED_INHIBITION_OF_PRE_REPLICATION_COMPLEX_FORMATION	0	0.598886	7.38821e-184	3.3883e-180
REACTOME_MITOTIC_PROMETAPHASE	REACTOME_SYNTHESIS_OF_DNA	0	0.612419	4.64005e-228	6.51901e-224
REACTOME_MITOTIC_PROMETAPHASE	REACTOME_ACTIVATION_OF_ATR_IN_RESPONSE_TO_REPLICATION_STRESS	0	0.682925	0	0
REACTOME_G2_M_CHECKPOINTS	REACTOME_MITOTIC_PROMETAPHASE	0	0.715334	0	0
REACTOME_S_PHASE	REACTOME_MITOTIC_PROMETAPHASE	0	0.637227	5.67816e-275	2.18514e-270

## Sheet: Cell Cycle Mitotic (Overlap)
Pathway.A	Pathway.B	OR	p.value	p.Adjust	Overlap.Coefficient
REACTOME_RECRUITMENT_OF_MITOTIC_CENTROSOME_PROTEINS_AND_COMPLEXES	REACTOME_CELL_CYCLE_MITOTIC	Inf	8.39201e-118	1.53238e-114	1
REACTOME_RECRUITMENT_OF_NUMA_TO_MITOTIC_CENTROSOMES	REACTOME_CELL_CYCLE_MITOTIC	Inf	6.60022e-19	3.88904e-17	1
REACTOME_RECRUITMENT_OF_NUMA_TO_MITOTIC_CENTROSOMES	REACTOME_RECRUITMENT_OF_MITOTIC_CENTROSOME_PROTEINS_AND_COMPLEXES	Inf	4.93395e-26	4.96533e-24	1
REACTOME_G1_PHASE	REACTOME_CELL_CYCLE_MITOTIC	Inf	5.31873e-65	2.43808e-62	1
REACTOME_G1_S_SPECIFIC_TRANSCRIPTION	REACTOME_CELL_CYCLE_MITOTIC	Inf	1.01785e-31	1.44461e-29	1
REACTOME_G1_S_SPECIFIC_TRANSCRIPTION	REACTOME_G1_PHASE	79.6722	0.000404633	0.00434772	0.117647

## Sheet: Mitotic Prometaphase II (Correl
Pathway.A	Pathway.B	Overlap.Coefficient	PathCor	p.value	p.Adjust
REACTOME_S_PHASE	REACTOME_APC_C_CDC20_MEDIATED_DEGRADATION_OF_MITOTIC_PROTEINS	0.676923	0.592196	2.26509e-224	3.03768e-220
REACTOME_MITOTIC_PROMETAPHASE	REACTOME_G1_S_TRANSITION	0.047619	0.585781	7.63817e-230	1.12678e-225
REACTOME_REGULATION_OF_MITOTIC_CELL_CYCLE	REACTOME_M_G1_TRANSITION	0.584416	0.577131	1.17634e-207	1.00115e-203
REACTOME_APC_C_CDC20_MEDIATED_DEGRADATION_OF_MITOTIC_PROTEINS	REACTOME_SYNTHESIS_OF_DNA	0.676923	0.576582	1.11294e-206	9.29324e-203
REACTOME_MITOTIC_PROMETAPHASE	REACTOME_MITOTIC_G1_G1_S_PHASES	0.047619	0.576092	1.43652e-219	1.71822e-215
REACTOME_MITOTIC_PROMETAPHASE	REACTOME_E2F_MEDIATED_REGULATION_OF_DNA_REPLICATION	0.121212	0.561628	2.43968e-159	6.11728e-156
REACTOME_APC_C_CDC20_MEDIATED_DEGRADATION_OF_MITOTIC_PROTEINS	REACTOME_M_G1_TRANSITION	0.676923	0.560984	3.46448e-197	2.39567e-193
REACTOME_APC_C_CDC20_MEDIATED_DEGRADATION_OF_MITOTIC_PROTEINS	REACTOME_G1_S_TRANSITION	0.676923	0.554596	1.74597e-184	8.13362e-181

## Sheet: Mitotic Prometaphase II (Overla
Pathway.A	Pathway.B	OR	p.value	p.Adjust
REACTOME_REGULATION_OF_MITOTIC_CELL_CYCLE	REACTOME_M_G1_TRANSITION	842.616	2.48188e-94	2.252e-91
REACTOME_APC_C_CDC20_MEDIATED_DEGRADATION_OF_MITOTIC_PROTEINS	REACTOME_M_G1_TRANSITION	1160.33	1.9345e-96	1.85231e-93
REACTOME_APC_C_CDC20_MEDIATED_DEGRADATION_OF_MITOTIC_PROTEINS	REACTOME_G1_S_TRANSITION	663.717	1.78428e-88	1.4245e-85
REACTOME_APC_C_CDC20_MEDIATED_DEGRADATION_OF_MITOTIC_PROTEINS	REACTOME_SYNTHESIS_OF_DNA	875.615	1.34483e-92	1.17428e-89
REACTOME_MITOTIC_PROMETAPHASE	REACTOME_G1_S_TRANSITION	9.62708	0.00107103	0.0104786
REACTOME_MITOTIC_PROMETAPHASE	REACTOME_MITOTIC_G1_G1_S_PHASES	7.78489	0.00226815	0.0207374
REACTOME_MITOTIC_PROMETAPHASE	REACTOME_E2F_MEDIATED_REGULATION_OF_DNA_REPLICATION	33.954	1.11538e-05	0.000157215
REACTOME_S_PHASE	REACTOME_APC_C_CDC20_MEDIATED_DEGRADATION_OF_MITOTIC_PROTEINS	663.717	1.78428e-88	1.4245e-85
