# Supplementary material for: The Pathway Coexpression Network: Revealing pathway relationships
Source: PLoS Comput Biol. 2018 Mar 19;14(3):e1006042. doi: 10.1371/journal.pcbi.1006042 (PMC5875878; doi:10.1371/journal.pcbi.1006042)
Supplement: S5 Table — (XLSX) [file pcbi.1006042.s008.xlsx]

## Sheet: Correated with ADCL 
Pathway.A	Pathway.B	Overlap.Coefficient	PathCor	p.value	p.Adjust
ADCL	REACTOME_GPVI_MEDIATED_ACTIVATION_CASCADE	0	0.47728	1.60987e-86	7.04708e-84
ADCL	REACTOME_IL_3_5_AND_GM_CSF_SIGNALING	0	0.463484	7.98483e-58	1.5574e-55
ADCL	REACTOME_ANTIGEN_PROCESSING_CROSS_PRESENTATION	0	0.42684	8.03128e-34	6.75594e-32
ADCL	PID_PDGFRB_PATHWAY	0	0.424941	6.57572e-41	7.23914e-39
ADCL	BIOCARTA_TOLL_PATHWAY	0	0.420401	1.60562e-44	2.01841e-42
ADCL	REACTOME_REGULATION_OF_SIGNALING_BY_CBL	0	0.416819	1.14011e-31	8.81183e-30
ADCL	KEGG_TOLL_LIKE_RECEPTOR_SIGNALING_PATHWAY	0	0.414051	1.86915e-44	2.3437e-42
ADCL	REACTOME_ACTIVATION_OF_IRF3_IRF7_MEDIATED_BY_TBK1_IKK_EPSILON	0	0.410063	6.55485e-57	1.24502e-54
ADCL	REACTOME_CELL_SURFACE_INTERACTIONS_AT_THE_VASCULAR_WALL	0	0.407937	3.67658e-25	2.15225e-23
ADCL	BIOCARTA_FCER1_PATHWAY	0	0.407933	8.17029e-49	1.19275e-46
ADCL	KEGG_FC_GAMMA_R_MEDIATED_PHAGOCYTOSIS	0.0163934	0.401888	1.74302e-54	3.07204e-52
ADCL	PID_TOLL_ENDOGENOUS_PATHWAY	0	0.393886	9.68655e-21	4.60853e-19
ADCL	REACTOME_TOLL_RECEPTOR_CASCADES	0.0491803	0.387894	6.75404e-64	1.56782e-61
ADCL	BIOCARTA_MONOCYTE_PATHWAY	0	0.387054	1.29403e-24	7.38801e-23
ADCL	REACTOME_ENDOSOMAL_VACUOLAR_PATHWAY	0	0.385355	8.81828e-13	2.73521e-11
ADCL	PID_IL8_CXCR2_PATHWAY	0	0.384069	2.27044e-14	7.70523e-13
ADCL	PID_RAC1_PATHWAY	0	0.377163	5.01202e-16	1.87032e-14
ADCL	KEGG_LEUKOCYTE_TRANSENDOTHELIAL_MIGRATION	0.0163934	0.372407	7.92523e-43	9.31944e-41
ADCL	REACTOME_SIGNALING_BY_ILS	0.0327869	0.369206	2.38847e-27	1.53919e-25
ADCL	PID_AMB2_NEUTROPHILS_PATHWAY	0	0.368412	3.5261e-09	8.67211e-08
ADCL	REACTOME_SIGNAL_REGULATORY_PROTEIN_SIRP_FAMILY_INTERACTIONS	0.0833333	0.368304	6.0029e-58	1.17524e-55
ADCL	REACTOME_INNATE_IMMUNE_SYSTEM	0.0655738	0.367984	8.41617e-43	9.88492e-41
ADCL	PID_IL6_7_PATHWAY	0	0.363576	2.31109e-07	4.972e-06
ADCL	PID_INTEGRIN2_PATHWAY	0	0.362431	0.00125464	0.0192508
ADCL	PID_TXA2PATHWAY	0	0.361526	7.92642e-14	2.60975e-12
ADCL	REACTOME_IKK_COMPLEX_RECRUITMENT_MEDIATED_BY_RIP1	0	0.359394	9.56045e-21	4.5505e-19
ADCL	REACTOME_IL_RECEPTOR_SHC_SIGNALING	0	0.358998	2.94271e-12	8.83796e-11
ADCL	KEGG_PATHOGENIC_ESCHERICHIA_COLI_INFECTION	0	0.358202	5.45407e-05	0.000961228
ADCL	REACTOME_INITIAL_TRIGGERING_OF_COMPLEMENT	0	0.358043	1.80058e-07	3.90675e-06
ADCL	BIOCARTA_IL3_PATHWAY	0	0.357793	7.3309e-19	3.1784e-17
ADCL	REACTOME_LATENT_INFECTION_OF_HOMO_SAPIENS_WITH_MYCOBACTERIUM_TUBERCULOSIS	0	0.355442	0.000477528	0.00766326
ADCL	BIOCARTA_LYM_PATHWAY	0	0.353622	1.67073e-26	1.03899e-24
ADCL	REACTOME_SIGNALING_BY_THE_B_CELL_RECEPTOR_BCR	0	0.350967	3.34184e-16	1.25976e-14
ADCL	KEGG_CHEMOKINE_SIGNALING_PATHWAY	0.0163934	0.35033	1.32644e-42	1.5495e-40
ADCL	BIOCARTA_CLASSIC_PATHWAY	0	0.348124	0.000823213	0.0128965
ADCL	REACTOME_TRAF6_MEDIATED_INDUCTION_OF_TAK1_COMPLEX	0	0.345098	6.56471e-07	1.3626e-05
ADCL	BIOCARTA_IL10_PATHWAY	0	0.344042	3.03865e-07	6.47525e-06
ADCL	REACTOME_IL_2_SIGNALING	0.0243902	0.342182	2.58128e-28	1.73164e-26
ADCL	PID_P38_ALPHA_BETA_PATHWAY	0	0.340384	2.03293e-07	4.39268e-06
ADCL	PID_GMCSF_PATHWAY	0.027027	0.340037	1.09597e-30	8.13673e-29
ADCL	REACTOME_ACTIVATED_TLR4_SIGNALLING	0.0327869	0.339855	4.0763e-42	4.68085e-40
ADCL	BIOCARTA_COMP_PATHWAY	0	0.338191	0.00102799	0.0159303
ADCL	PID_IL8_CXCR1_PATHWAY	0	0.336972	3.33308e-05	0.000599042
ADCL	PID_KIT_PATHWAY	0	0.334951	0.000936514	0.0145806
ADCL	REACTOME_INFLAMMASOMES	0.0625	0.334858	2.45923e-22	1.26208e-20
ADCL	BIOCARTA_GSK3_PATHWAY	0	0.334626	7.25281e-07	1.49937e-05
ADCL	REACTOME_PLATELET_ACTIVATION_SIGNALING_AND_AGGREGATION	0.0327869	0.334302	1.74095e-34	1.5035e-32
ADCL	REACTOME_IMMUNOREGULATORY_INTERACTIONS_BETWEEN_A_LYMPHOID_AND_A_NON_LYMPHOID_CELL	0	0.33271	1.03534e-06	2.11296e-05
ADCL	PID_IFNG_PATHWAY	0	0.329723	0.000507738	0.00812362
ADCL	SIG_PIP3_SIGNALING_IN_B_LYMPHOCYTES	0	0.329662	3.65672e-06	7.13649e-05
ADCL	KEGG_FC_EPSILON_RI_SIGNALING_PATHWAY	0.0163934	0.329149	1.55993e-23	8.46337e-22
ADCL	REACTOME_CD28_DEPENDENT_VAV1_PATHWAY	0	0.326303	8.0027e-05	0.00138902
ADCL	PID_FCER1_PATHWAY	0.0163934	0.326298	1.77748e-33	1.47379e-31
ADCL	BIOCARTA_NKT_PATHWAY	0	0.32627	3.18994e-06	6.25573e-05
ADCL	REACTOME_THE_NLRP3_INFLAMMASOME	0.0909091	0.325327	5.49129e-14	1.82572e-12
ADCL	REACTOME_INTEGRIN_CELL_SURFACE_INTERACTIONS	0	0.325226	5.34018e-05	0.000942094
ADCL	REACTOME_HEMOSTASIS	0.0327869	0.323967	6.11128e-29	4.20196e-27
ADCL	BIOCARTA_THELPER_PATHWAY	0	0.32396	4.04661e-18	1.68917e-16
ADCL	PID_CMYB_PATHWAY	0	0.323417	0.00109676	0.0169417
ADCL	PID_AVB3_OPN_PATHWAY	0.0322581	0.323027	1.67949e-22	8.69219e-21
ADCL	ST_B_CELL_ANTIGEN_RECEPTOR	0	0.320666	6.95977e-11	1.91686e-09
ADCL	REACTOME_IMMUNE_SYSTEM	0.163934	0.318969	9.41578e-28	6.17795e-26
ADCL	REACTOME_TRAFFICKING_AND_PROCESSING_OF_ENDOSOMAL_TLR	0.0833333	0.317487	1.41976e-28	9.62364e-27
ADCL	BIOCARTA_IL2RB_PATHWAY	0	0.316304	0.000166599	0.00280271
ADCL	REACTOME_MYD88_MAL_CASCADE_INITIATED_ON_PLASMA_MEMBRANE	0.0327869	0.313651	7.75249e-29	5.30856e-27
ADCL	KEGG_LYSOSOME	0.0163934	0.308231	5.59267e-18	2.3176e-16
ADCL	KEGG_NOD_LIKE_RECEPTOR_SIGNALING_PATHWAY	0	0.307861	1.17121e-09	2.97257e-08
ADCL	REACTOME_PECAM1_INTERACTIONS	0	0.306458	0.000535927	0.00855653
ADCL	PID_INTEGRIN_A4B1_PATHWAY	0.030303	0.304645	1.80729e-19	8.07745e-18
ADCL	REACTOME_ADAPTIVE_IMMUNE_SYSTEM	0.0655738	0.30016	1.00256e-27	6.56834e-26
ADCL	PID_CXCR4_PATHWAY	0.0655738	0.299827	4.35178e-37	4.16503e-35
ADCL	PID_PI3KCI_PATHWAY	0.0204082	0.298256	1.82744e-21	8.99009e-20
ADCL	REACTOME_CYTOKINE_SIGNALING_IN_IMMUNE_SYSTEM	0.0819672	0.29226	5.99565e-19	2.61138e-17
ADCL	REACTOME_NUCLEOTIDE_LIKE_PURINERGIC_RECEPTORS	0	0.292116	1.23059e-06	2.49607e-05
ADCL	KEGG_B_CELL_RECEPTOR_SIGNALING_PATHWAY	0.0163934	0.289928	9.74338e-22	4.84904e-20
ADCL	PID_INTEGRIN_CS_PATHWAY	0	0.28681	3.22504e-06	6.32219e-05
ADCL	BIOCARTA_TCYTOTOXIC_PATHWAY	0	0.286681	1.0824e-20	5.13615e-19
ADCL	PID_BCR_5PATHWAY	0.0163934	0.283653	4.58305e-11	1.27704e-09
ADCL	PID_ALPHA_SYNUCLEIN_PATHWAY	0.030303	0.283203	4.56301e-10	1.19163e-08
ADCL	REACTOME_NUCLEOTIDE_BINDING_DOMAIN_LEUCINE_RICH_REPEAT_CONTAINING_RECEPTOR_NLR_SIGNALING_PATHWAYS	0.0222222	0.282566	1.2301e-13	4.00404e-12
ADCL	REACTOME_THE_ROLE_OF_NEF_IN_HIV1_REPLICATION_AND_DISEASE_PATHOGENESIS	0.037037	0.276005	2.50879e-13	8.02865e-12
ADCL	BIOCARTA_NKCELLS_PATHWAY	0.0555556	0.274492	8.66684e-12	2.52806e-10
ADCL	SA_MMP_CYTOKINE_CONNECTION	0.0714286	0.27391	3.10076e-05	0.000558728
ADCL	KEGG_NATURAL_KILLER_CELL_MEDIATED_CYTOTOXICITY	0.0163934	0.27133	4.35921e-06	8.45345e-05
ADCL	REACTOME_NFKB_AND_MAP_KINASES_ACTIVATION_MEDIATED_BY_TLR4_SIGNALING_REPERTOIRE	0.0327869	0.271105	2.87922e-14	9.72315e-13
ADCL	KEGG_LEISHMANIA_INFECTION	0.0983607	0.269392	1.36103e-20	6.42559e-19
ADCL	PID_VEGFR1_2_PATHWAY	0.0163934	0.267866	0.000322631	0.00527224
ADCL	REACTOME_INTERFERON_SIGNALING	0.0491803	0.265744	4.54724e-09	1.10895e-07
ADCL	PID_IL4_2PATHWAY	0.0163934	0.262385	3.1689e-10	8.35748e-09
ADCL	REACTOME_COMPLEMENT_CASCADE	0.0344828	0.261241	4.381e-09	1.07e-07
ADCL	PID_EPO_PATHWAY	0.030303	0.257809	2.506e-08	5.8026e-07
ADCL	REACTOME_INTERFERON_GAMMA_SIGNALING	0.0357143	0.254056	1.33766e-08	3.16074e-07
ADCL	BIOCARTA_IL7_PATHWAY	0.0588235	0.251297	0.00118635	0.0182549
ADCL	PID_IL2_1PATHWAY	0.0181818	0.251083	0.000277667	0.00456817
ADCL	PID_IL3_PATHWAY	0.0384615	0.245711	4.51126e-06	8.73718e-05
ADCL	REACTOME_SEMAPHORIN_INTERACTIONS	0.0327869	0.244409	1.05984e-05	0.000199054
ADCL	PID_GLYPICAN_1PATHWAY	0.037037	0.243699	1.02682e-07	2.27134e-06
ADCL	REACTOME_TRAF6_MEDIATED_INDUCTION_OF_NFKB_AND_MAP_KINASES_UPON_TLR7_8_OR_9_ACTIVATION	0.0327869	0.238209	3.42944e-08	7.86202e-07
ADCL	BIOCARTA_BLYMPHOCYTE_PATHWAY	0.272727	0.236838	5.65869e-13	1.7766e-11
ADCL	PID_CASPASE_PATHWAY	0.0192308	0.236529	0.00106588	0.0164866
ADCL	REACTOME_RESPONSE_TO_ELEVATED_PLATELET_CYTOSOLIC_CA2_	0.0327869	0.236143	4.61185e-07	9.68795e-06
ADCL	REACTOME_TRANS_GOLGI_NETWORK_VESICLE_BUDDING	0.0169492	0.232879	0.000881721	0.0137673
ADCL	BIOCARTA_DC_PATHWAY	0.0454545	0.227642	7.34294e-06	0.00013975
ADCL	KEGG_VIRAL_MYOCARDITIS	0.0819672	0.227566	2.74423e-14	9.27544e-13
ADCL	SIG_BCR_SIGNALING_PATHWAY	0.0217391	0.226633	3.18327e-12	9.53747e-11
ADCL	KEGG_COMPLEMENT_AND_COAGULATION_CASCADES	0.0163934	0.219182	3.00382e-06	5.90421e-05
ADCL	KEGG_SYSTEMIC_LUPUS_ERYTHEMATOSUS	0.0819672	0.206657	2.28323e-05	0.000416419
ADCL	REACTOME_REGULATION_OF_COMPLEMENT_CASCADE	0.0769231	0.196825	0.00105412	0.0163118
ADCL	REACTOME_COSTIMULATION_BY_THE_CD28_FAMILY	0.0338983	0.196441	2.3565e-05	0.000429181
ADCL	REACTOME_METABOLISM_OF_LIPIDS_AND_LIPOPROTEINS	0.0327869	0.194496	0.000250233	0.00413642
ADCL	REACTOME_PHOSPHORYLATION_OF_CD3_AND_TCR_ZETA_CHAINS	0.153846	0.184562	4.90866e-11	1.36554e-09
ADCL	REACTOME_TCR_SIGNALING	0.0408163	0.179831	0.000732424	0.0115389
ADCL	REACTOME_MHC_CLASS_II_ANTIGEN_PRESENTATION	0.0655738	0.176666	0.00136183	0.020801
ADCL	KEGG_INTESTINAL_IMMUNE_NETWORK_FOR_IGA_PRODUCTION	0.111111	0.161585	6.16097e-07	1.28192e-05
ADCL	KEGG_ALLOGRAFT_REJECTION	0.147059	0.157102	3.36656e-09	8.29009e-08
ADCL	KEGG_ASTHMA	0.185185	0.140295	9.85761e-05	0.00169578
ADCL	REACTOME_GENERATION_OF_SECOND_MESSENGER_MOLECULES	0.0833333	0.139047	2.26955e-05	0.000414026
ADCL	KEGG_CELL_ADHESION_MOLECULES_CAMS	0.0819672	0.135173	0.000473868	0.0076077
ADCL	KEGG_TYPE_I_DIABETES_MELLITUS	0.125	0.133646	0.000155377	0.00262126
ADCL	REACTOME_TRANSLOCATION_OF_ZAP_70_TO_IMMUNOLOGICAL_SYNAPSE	0.181818	0.130459	2.30087e-05	0.000419463
ADCL	BIOCARTA_CSK_PATHWAY	0.0909091	0.127288	2.34193e-05	0.000426606
ADCL	BIOCARTA_TH1TH2_PATHWAY	0.105263	0.125639	1.00451e-07	2.22366e-06
ADCL	PID_IL12_2PATHWAY	0.0327869	0.125357	0.00203604	0.0304826
ADCL	KEGG_GRAFT_VERSUS_HOST_DISEASE	0.135135	0.112776	4.20422e-05	0.00074869
ADCL	BIOCARTA_TCRA_PATHWAY	0.181818	0.110873	0.000156842	0.00264486
ADCL	PID_IL12_STAT4_PATHWAY	0.0625	0.107035	0.0017657	0.0266252
ADCL	KEGG_AUTOIMMUNE_THYROID_DISEASE	0.104167	0.0995853	0.00315873	0.0461839

## Sheet: Enriched for ADCL
Pathway	n_pathway	n_shared	pct_shared	OR	p_Fisher	p_Adjust
KEGG_ASTHMA	28	5	0.178571	79.2114	1.81648e-08	2.41592e-05
KEGG_LEISHMANIA_INFECTION	69	6	0.0869565	35.287	5.50542e-08	2.61806e-05
KEGG_ALLOGRAFT_REJECTION	35	5	0.142857	60.7663	5.9054e-08	2.61806e-05
KEGG_GRAFT_VERSUS_HOST_DISEASE	38	5	0.131579	55.2551	9.06883e-08	3.01539e-05
KEGG_TYPE_I_DIABETES_MELLITUS	41	5	0.121951	50.6015	1.34478e-07	3.57711e-05
KEGG_ANTIGEN_PROCESSING_AND_PRESENTATION	84	6	0.0714286	28.5251	1.80359e-07	3.99795e-05
KEGG_INTESTINAL_IMMUNE_NETWORK_FOR_IGA_PRODUCTION	46	5	0.108696	44.4428	2.43201e-07	4.62081e-05
KEGG_AUTOIMMUNE_THYROID_DISEASE	50	5	0.1	40.5133	3.72513e-07	6.19302e-05
KEGG_ALZHEIMERS_DISEASE	160	7	0.04375	17.2206	4.65664e-07	6.88148e-05
KEGG_VIRAL_MYOCARDITIS	68	5	0.0735294	28.9235	1.75933e-06	0.000233991
BIOCARTA_BLYMPHOCYTE_PATHWAY	11	3	0.272727	131.868	4.03548e-06	0.000487926
KEGG_HEMATOPOIETIC_CELL_LINEAGE	86	5	0.0581395	22.4655	5.64252e-06	0.000500304
REACTOME_SIGNALING_BY_NOTCH4	12	3	0.25	117.026	5.36926e-06	0.000500304
REACTOME_SIGNALING_BY_NOTCH2	12	3	0.25	117.026	5.36926e-06	0.000500304
REACTOME_SIGNALING_BY_NOTCH3	12	3	0.25	117.026	5.36926e-06	0.000500304
REACTOME_NRIF_SIGNALS_CELL_DEATH_FROM_THE_NUCLEUS	14	3	0.214286	95.9982	8.84615e-06	0.000735336
KEGG_SYSTEMIC_LUPUS_ERYTHEMATOSUS	117	5	0.042735	16.2362	2.53031e-05	0.00197959
KEGG_CELL_ADHESION_MOLECULES_CAMS	130	5	0.0384615	14.5417	4.19728e-05	0.00310132
REACTOME_ACTIVATED_NOTCH1_TRANSMITS_SIGNAL_TO_THE_NUCLEUS	26	3	0.115385	45.933	6.1603e-05	0.00431221
REACTOME_MHC_CLASS_II_ANTIGEN_PRESENTATION	88	4	0.0454545	17.0264	0.000135904	0.00903762
REACTOME_IMMUNE_SYSTEM	872	10	0.0114679	4.46457	0.000226748	0.0143607
PID_CXCR4_PATHWAY	102	4	0.0392157	14.5968	0.000240121	0.0145164
BIOCARTA_IL5_PATHWAY	10	2	0.2	86.6141	0.000383984	0.0212791
REACTOME_REGULATED_PROTEOLYSIS_OF_P75NTR	10	2	0.2	86.6141	0.000383984	0.0212791
REACTOME_SIGNALLING_BY_NGF	212	5	0.0235849	8.74523	0.000414464	0.0220495
BIOCARTA_P35ALZHEIMERS_PATHWAY	11	2	0.181818	76.9116	0.000468417	0.0230739
BIOCARTA_TCRA_PATHWAY	11	2	0.181818	76.9116	0.000468417	0.0230739
BIOCARTA_ASBCELL_PATHWAY	12	2	0.166667	69.244	0.000561026	0.0257298
REACTOME_TRANSLOCATION_OF_ZAP_70_TO_IMMUNOLOGICAL_SYNAPSE	12	2	0.166667	69.244	0.000561026	0.0257298
REACTOME_CELL_DEATH_SIGNALLING_VIA_NRAGE_NRIF_AND_NADE	58	3	0.0517241	19.2112	0.000683341	0.0302948
REACTOME_PHOSPHORYLATION_OF_CD3_AND_TCR_ZETA_CHAINS	14	2	0.142857	57.7378	0.000770584	0.0330606
PID_TCR_PATHWAY	66	3	0.0454545	16.7492	0.000996476	0.0407979
REACTOME_PD1_SIGNALING	16	2	0.125	49.4496	0.00101228	0.0407979
PID_P75_NTR_PATHWAY	69	3	0.0434783	15.9972	0.00113376	0.0411603
PID_SYNDECAN_3_PATHWAY	17	2	0.117647	46.1718	0.00114506	0.0411603
REACTOME_SIGNALING_BY_NOTCH1	68	3	0.0441176	16.2474	0.00108675	0.0411603
REACTOME_CYTOKINE_SIGNALING_IN_IMMUNE_SYSTEM	261	5	0.0191571	7.05463	0.00105886	0.0411603
BIOCARTA_NDKDYNAMIN_PATHWAY	18	2	0.111111	43.2499	0.00128573	0.0450007
BIOCARTA_TH1TH2_PATHWAY	19	2	0.105263	40.7699	0.00143426	0.047689
BIOCARTA_CTLA4_PATHWAY	19	2	0.105263	40.7699	0.00143426	0.047689
