# Supplementary material for: The Pathway Coexpression Network: Revealing pathway relationships
Source: PLoS Comput Biol. 2018 Mar 19;14(3):e1006042. doi: 10.1371/journal.pcbi.1006042 (PMC5875878; doi:10.1371/journal.pcbi.1006042)
Supplement: S6 Table — (XLSX) [file pcbi.1006042.s009.xlsx]

## Sheet: GAD_genes_barcode.csv
ENTREZID	SYMBOL	GENENAME
2645	GCK	glucokinase
124	ADH1A	alcohol dehydrogenase 1A (class I), alpha polypeptide
5105	PCK1	phosphoenolpyruvate carboxykinase 1
217	ALDH2	aldehyde dehydrogenase 2 family (mitochondrial)
2597	GAPDH	glyceraldehyde-3-phosphate dehydrogenase
2026	ENO2	enolase 2 (gamma, neuronal)
1738	DLD	dihydrolipoamide dehydrogenase
1743	DLST	dihydrolipoamide S-succinyltransferase (E2 component of 2-oxo-glutarate complex)
2683	B4GALT1	UDP-Gal:betaGlcNAc beta 1,4- galactosyltransferase, polypeptide 1
3938	LCT	lactase
1374	CPT1A	carnitine palmitoyltransferase 1A
38	ACAT1	acetyl-CoA acetyltransferase 1
1375	CPT1B	carnitine palmitoyltransferase 1B
6646	SOAT1	sterol O-acyltransferase 1
3988	LIPA	lipase A, lysosomal acid type
10858	CYP46A1	cytochrome P450 family 46 subfamily A member 1
9023	CH25H	cholesterol 25-hydroxylase
1312	COMT	catechol-O-methyltransferase
3290	HSD11B1	hydroxysteroid (11-beta) dehydrogenase 1
1588	CYP19A1	cytochrome P450 family 19 subfamily A member 1
1586	CYP17A1	cytochrome P450 family 17 subfamily A member 1
1585	CYP11B2	cytochrome P450 family 11 subfamily B member 2
1543	CYP1A1	cytochrome P450 family 1 subfamily A member 1
6716	SRD5A2	steroid 5 alpha-reductase 2
4513	COX2	cytochrome c oxidase subunit II
4512	COX1	cytochrome c oxidase subunit I
4514	COX3	cytochrome c oxidase III
1352	COX10	COX10 heme A:farnesyltransferase cytochrome c oxidase assembly factor
1355	COX15	COX15 cytochrome c oxidase assembly homolog
5167	ENPP1	ectonucleotide pyrophosphatase/phosphodiesterase 1
2572	GAD2	glutamate decarboxylase 2
4128	MAOA	monoamine oxidase A
875	CBS	cystathionine-beta-synthase
4548	MTR	5-methyltetrahydrofolate-homocysteine methyltransferase
3158	HMGCS2	3-hydroxy-3-methylglutaryl-CoA synthase 2
3157	HMGCS1	3-hydroxy-3-methylglutaryl-CoA synthase 1
4846	NOS3	nitric oxide synthase 3
4843	NOS2	nitric oxide synthase 2
5009	OTC	ornithine carbamoyltransferase
10841	FTCD	formimidoyltransferase cyclodeaminase
1621	DBH	dopamine beta-hydroxylase (dopamine beta-monooxygenase)
5409	PNMT	phenylethanolamine N-methyltransferase
847	CAT	catalase
23417	MLYCD	malonyl-CoA decarboxylase
2950	GSTP1	glutathione S-transferase pi 1
2952	GSTT1	glutathione S-transferase theta 1
9446	GSTO1	glutathione S-transferase omega 1
2944	GSTM1	glutathione S-transferase mu 1
2947	GSTM3	glutathione S-transferase mu 3 (brain)
2876	GPX1	glutathione peroxidase 1
119391	GSTO2	glutathione S-transferase omega 2
5834	PYGB	phosphorylase, glycogen; brain
84920	ALG10	ALG10, alpha-1,2-glucosyltransferase
57678	GPAM	glycerol-3-phosphate acyltransferase, mitochondrial
8694	DGAT1	diacylglycerol O-acyltransferase 1
4023	LPL	lipoprotein lipase
3990	LIPC	lipase C, hepatic type
8396	PIP4K2B	phosphatidylinositol-5-phosphate 4-kinase, type II, beta
5290	PIK3CA	phosphatidylinositol-4,5-bisphosphate 3-kinase catalytic subunit alpha
5298	PI4KB	phosphatidylinositol 4-kinase beta
1103	CHAT	choline O-acetyltransferase
43	ACHE	acetylcholinesterase (Yt blood group)
8398	PLA2G6	phospholipase A2 group VI
5321	PLA2G4A	phospholipase A2 group IVA
26279	PLA2G2D	phospholipase A2 group IID
3931	LCAT	lecithin-cholesterol acyltransferase
5048	PAFAH1B1	platelet activating factor acetylhydrolase 1b regulatory subunit 1
7941	PLA2G7	phospholipase A2 group VII
240	ALOX5	arachidonate 5-lipoxygenase
5740	PTGIS	prostaglandin I2 (prostacyclin) synthase
1562	CYP2C18	cytochrome P450 family 2 subfamily C member 18
246	ALOX15	arachidonate 15-lipoxygenase
5743	PTGS2	prostaglandin-endoperoxide synthase 2
5742	PTGS1	prostaglandin-endoperoxide synthase 1 (prostaglandin G/H synthase and cyclooxygenase)
239	ALOX12	arachidonate 12-lipoxygenase
9536	PTGES	prostaglandin E synthase
4056	LTC4S	leukotriene C4 synthase
6916	TBXAS1	thromboxane A synthase 1
32	ACACB	acetyl-CoA carboxylase beta
25902	MTHFD1L	methylenetetrahydrofolate dehydrogenase (NADP+ dependent) 1-like
4522	MTHFD1	methylenetetrahydrofolate dehydrogenase (NADP+ dependent) 1, methenyltetrahydrofolate cyclohydrolase, formyltetrahydrofolate synthetase
4524	MTHFR	methylenetetrahydrofolate reductase (NAD(P)H)
249	ALPL	alkaline phosphatase, liver/bone/kidney
1592	CYP26A1	cytochrome P450 family 26 subfamily A member 1
9227	LRAT	lecithin retinol acyltransferase (phosphatidylcholine--retinol O-acyltransferase)
3162	HMOX1	heme oxygenase 1
3156	HMGCR	3-hydroxy-3-methylglutaryl-CoA reductase
768	CA9	carbonic anhydrase IX
1565	CYP2D6	cytochrome P450 family 2 subfamily D member 6
9	NAT1	N-acetyltransferase 1 (arylamine N-acetyltransferase)
6319	SCD	stearoyl-CoA desaturase (delta-9-desaturase)
215	ABCD1	ATP binding cassette subfamily D member 1
19	ABCA1	ATP binding cassette subfamily A member 1
9429	ABCG2	ATP binding cassette subfamily G member 2 (Junior blood group)
26154	ABCA12	ATP binding cassette subfamily A member 12
5243	ABCB1	ATP binding cassette subfamily B member 1
6833	ABCC8	ATP binding cassette subfamily C member 8
64240	ABCG5	ATP binding cassette subfamily G member 5
3329	HSPD1	heat shock protein family D (Hsp60) member 1
6872	TAF1	TATA-box binding protein associated factor 1
5981	RFC1	replication factor C subunit 1
5983	RFC3	replication factor C subunit 3
3304	HSPA1B	heat shock protein family A (Hsp70) member 1B
3306	HSPA2	heat shock protein family A (Hsp70) member 2
3303	HSPA1A	heat shock protein family A (Hsp70) member 1A
3458	IFNG	interferon, gamma
5698	PSMB9	proteasome subunit beta 9
335	APOA1	apolipoprotein A-I
4312	MMP1	matrix metallopeptidase 1
116519	APOA5	apolipoprotein A-V
6257	RXRB	retinoid X receptor beta
6258	RXRG	retinoid X receptor gamma
5360	PLTP	phospholipid transfer protein
6256	RXRA	retinoid X receptor alpha
345	APOC3	apolipoprotein C-III
4973	OLR1	oxidized low density lipoprotein receptor 1
11001	SLC27A2	solute carrier family 27 member 2
5465	PPARA	peroxisome proliferator activated receptor alpha
9370	ADIPOQ	adiponectin, C1Q and collagen domain containing
5468	PPARG	peroxisome proliferator activated receptor gamma
5467	PPARD	peroxisome proliferator activated receptor delta
7515	XRCC1	X-ray repair complementing defective repair in Chinese hamster cells 1
4968	OGG1	8-oxoguanine DNA glycosylase
328	APEX1	apurinic/apyrimidinic endodeoxyribonuclease 1
142	PARP1	poly(ADP-ribose) polymerase 1
207	AKT1	v-akt murine thymoma viral oncogene homolog 1
929	CD14	CD14 molecule
4790	NFKB1	nuclear factor of kappa light polypeptide gene enhancer in B-cells 1
4609	MYC	v-myc avian myelocytomatosis viral oncogene homolog
7189	TRAF6	TNF receptor associated factor 6
7040	TGFB1	transforming growth factor beta 1
7186	TRAF2	TNF receptor associated factor 2
627	BDNF	brain-derived neurotrophic factor
2246	FGF1	fibroblast growth factor 1
2247	FGF2	fibroblast growth factor 2
7850	IL1R2	interleukin 1 receptor type 2
2263	FGFR2	fibroblast growth factor receptor 2
2261	FGFR3	fibroblast growth factor receptor 3
2260	FGFR1	fibroblast growth factor receptor 1
2885	GRB2	growth factor receptor bound protein 2
2258	FGF13	fibroblast growth factor 13
8074	FGF23	fibroblast growth factor 23
9479	MAPK8IP1	mitogen-activated protein kinase 8 interacting protein 1
4137	MAPT	microtubule associated protein tau
5530	PPP3CA	protein phosphatase 3 catalytic subunit alpha
5534	PPP3R1	protein phosphatase 3 regulatory subunit B, alpha
5159	PDGFRB	platelet derived growth factor receptor beta
3552	IL1A	interleukin 1 alpha
4803	NGF	nerve growth factor
5156	PDGFRA	platelet derived growth factor receptor alpha
5567	PRKACB	protein kinase cAMP-activated catalytic subunit beta
6722	SRF	serum response factor
7124	TNF	tumor necrosis factor
773	CACNA1A	calcium voltage-gated channel subunit alpha1 A
7132	TNFRSF1A	tumor necrosis factor receptor superfamily member 1A
3553	IL1B	interleukin 1 beta
4908	NTF3	neurotrophin 3
3554	IL1R1	interleukin 1 receptor type 1
7157	TP53	tumor protein p53
355	FAS	Fas cell surface death receptor
4915	NTRK2	neurotrophic tyrosine kinase, receptor, type 2
4914	NTRK1	neurotrophic tyrosine kinase, receptor, type 1
3084	NRG1	neuregulin 1
2475	MTOR	mechanistic target of rapamycin
1978	EIF4EBP1	eukaryotic translation initiation factor 4E binding protein 1
25	ABL1	ABL proto-oncogene 1, non-receptor tyrosine kinase
27	ABL2	ABL proto-oncogene 2, non-receptor tyrosine kinase
2932	GSK3B	glycogen synthase kinase 3 beta
818	CAMK2G	calcium/calmodulin-dependent protein kinase II gamma
5295	PIK3R1	phosphoinositide-3-kinase regulatory subunit 1
5737	PTGFR	prostaglandin F receptor
5731	PTGER1	prostaglandin E receptor 1
5733	PTGER3	prostaglandin E receptor 3
155	ADRB3	adrenoceptor beta 3
154	ADRB2	adrenoceptor beta 2
153	ADRB1	adrenoceptor beta 1
1909	EDNRA	endothelin receptor type A
1812	DRD1	dopamine receptor D1
1910	EDNRB	endothelin receptor type B
185	AGTR1	angiotensin II receptor type 1
1139	CHRNA7	cholinergic receptor nicotinic alpha 7 subunit
3362	HTR6	5-hydroxytryptamine receptor 6
3356	HTR2A	5-hydroxytryptamine receptor 2A
3358	HTR2C	5-hydroxytryptamine receptor 2C
148	ADRA1A	adrenoceptor alpha 1A
2925	GRPR	gastrin releasing peptide receptor
3973	LHCGR	luteinizing hormone/choriogonadotropin receptor
6915	TBXA2R	thromboxane A2 receptor
6347	CCL2	C-C motif chemokine ligand 2
6348	CCL3	C-C motif chemokine ligand 3
6351	CCL4	C-C motif chemokine ligand 4
6355	CCL8	C-C motif chemokine ligand 8
8600	TNFSF11	tumor necrosis factor superfamily member 11
1437	CSF2	colony stimulating factor 2
6376	CX3CL1	C-X3-C motif chemokine ligand 1
729230	CCR2	chemokine (C-C motif) receptor 2
6387	CXCL12	C-X-C motif chemokine ligand 12
4982	TNFRSF11B	tumor necrosis factor receptor superfamily member 11b
3953	LEPR	leptin receptor
4049	LTA	lymphotoxin alpha
3606	IL18	interleukin 18
959	CD40LG	CD40 ligand
2690	GHR	growth hormone receptor
2688	GH1	growth hormone 1
8809	IL18R1	interleukin 18 receptor 1
1271	CNTFR	ciliary neurotrophic factor receptor
7422	VEGFA	vascular endothelial growth factor A
4804	NGFR	nerve growth factor receptor
8771	TNFRSF6B	tumor necrosis factor receptor superfamily member 6b
3576	CXCL8	C-X-C motif chemokine ligand 8
3592	IL12A	interleukin 12A
3791	KDR	kinase insert domain receptor
7133	TNFRSF1B	tumor necrosis factor receptor superfamily member 1B
1234	CCR5	chemokine (C-C motif) receptor 5 (gene/pseudogene)
3586	IL10	interleukin 10
3589	IL11	interleukin 11
3562	IL3	interleukin 3
1230	CCR1	chemokine (C-C motif) receptor 1
3459	IFNGR1	interferon gamma receptor 1
8792	TNFRSF11A	tumor necrosis factor receptor superfamily member 11a
3558	IL2	interleukin 2
3570	IL6R	interleukin 6 receptor
655	BMP7	bone morphogenetic protein 7
3565	IL4	interleukin 4
3566	IL4R	interleukin 4 receptor
3569	IL6	interleukin 6
2784	GNB3	G protein subunit beta 3
1445	CSK	c-src tyrosine kinase
5732	PTGER2	prostaglandin E receptor 2
5734	PTGER4	prostaglandin E receptor 4
5739	PTGIR	prostaglandin I2 (prostacyclin) receptor (IP)
150	ADRA2A	adrenoceptor alpha 2A
7068	THRB	thyroid hormone receptor beta
7067	THRA	thyroid hormone receptor, alpha
5745	PTH1R	parathyroid hormone 1 receptor
4887	NPY2R	neuropeptide Y receptor Y2
1813	DRD2	dopamine receptor D2
1814	DRD3	dopamine receptor D3
1815	DRD4	dopamine receptor D4
186	AGTR2	angiotensin II receptor type 2
2692	GHRHR	growth hormone releasing hormone receptor
3972	LHB	luteinizing hormone beta polypeptide
2492	FSHR	follicle stimulating hormone receptor
116443	GRIN3A	glutamate ionotropic receptor NMDA type subunit 3A
116444	GRIN3B	glutamate ionotropic receptor NMDA type subunit 3B
2147	F2	coagulation factor II, thrombin
799	CALCR	calcitonin receptor
1137	CHRNA4	cholinergic receptor nicotinic alpha 4 subunit
2904	GRIN2B	glutamate ionotropic receptor NMDA type subunit 2B
1136	CHRNA3	cholinergic receptor nicotinic alpha 3 subunit
1241	LTB4R	leukotriene B4 receptor
1141	CHRNB2	cholinergic receptor nicotinic beta 2 subunit
1387	CREBBP	CREB binding protein
7534	YWHAZ	tyrosine 3-monooxygenase/tryptophan 5-monooxygenase activation protein zeta
896	CCND3	cyclin D3
4088	SMAD3	SMAD family member 3
1029	CDKN2A	cyclin-dependent kinase inhibitor 2A
3479	IGF1	insulin like growth factor 1
3480	IGF1R	insulin like growth factor 1 receptor
3630	INS	insulin
367	AR	androgen receptor
3486	IGFBP3	insulin like growth factor binding protein 3
7161	TP73	tumor protein p73
5054	SERPINE1	serpin peptidase inhibitor, clade E (nexin, plasminogen activator inhibitor type 1), member 1
7329	UBE2I	ubiquitin conjugating enzyme E2I
8651	SOCS1	suppressor of cytokine signaling 1
23759	PPIL2	peptidylprolyl isomerase like 2
9817	KEAP1	kelch like ECH associated protein 1
6804	STX1A	syntaxin 1A
6844	VAMP2	vesicle associated membrane protein 2
10490	VTI1B	vesicle transport through interaction with t-SNAREs 1B
143187	VTI1A	vesicle transport through interaction with t-SNAREs 1A
5562	PRKAA1	protein kinase AMP-activated catalytic subunit alpha 1
3482	IGF2R	insulin like growth factor 2 receptor
1520	CTSS	cathepsin S
1513	CTSK	cathepsin K
1509	CTSD	cathepsin D
4864	NPC1	Niemann-Pick disease, type C1
1785	DNM2	dynamin 2
3949	LDLR	low density lipoprotein receptor
50855	PARD6A	par-6 family cell polarity regulator alpha
3105	HLA-A	major histocompatibility complex, class I, A
1601	DAB2	Dab, mitogen-responsive phosphoprotein, homolog 2 (Drosophila)
6794	STK11	serine/threonine kinase 11
7137	TNNI3	troponin I3, cardiac type
5592	PRKG1	protein kinase, cGMP-dependent, type I
4041	LRP5	LDL receptor related protein 5
6934	TCF7L2	transcription factor 7 like 2
5663	PSEN1	presenilin 1
4855	NOTCH4	notch 4
5664	PSEN2	presenilin 2
51107	APH1A	aph-1 homolog A, gamma secretase subunit
6868	ADAM17	ADAM metallopeptidase domain 17
55851	PSENEN	presenilin enhancer gamma secretase subunit
182	JAG1	jagged 1
23385	NCSTN	nicastrin
4036	LRP2	LDL receptor related protein 2
652	BMP4	bone morphogenetic protein 4
1311	COMP	cartilage oligomeric matrix protein
10507	SEMA4D	semaphorin 4D
1944	EFNA3	ephrin-A3
10371	SEMA3A	semaphorin 3A
1020	CDK5	cyclin-dependent kinase 5
2534	FYN	FYN proto-oncogene, Src family tyrosine kinase
5649	RELN	reelin
1302	COL11A2	collagen type XI alpha 2
7450	VWF	von Willebrand factor
857	CAV1	caveolin 1
1292	COL6A2	collagen type VI alpha 2
1291	COL6A1	collagen type VI alpha 1
3674	ITGA2B	integrin subunit alpha 2b
6696	SPP1	secreted phosphoprotein 1
1277	COL1A1	collagen type I alpha 1
89	ACTN3	actinin alpha 3 (gene/pseudogene)
7148	TNXB	tenascin XB
3673	ITGA2	integrin subunit alpha 2
3339	HSPG2	heparan sulfate proteoglycan 2
7412	VCAM1	vascular cell adhesion molecule 1
6403	SELP	selectin P
6401	SELE	selectin E
3123	HLA-DRB1	major histocompatibility complex, class II, DR beta 1
3122	HLA-DRA	major histocompatibility complex, class II, DR alpha
3383	ICAM1	intercellular adhesion molecule 1
5788	PTPRC	protein tyrosine phosphatase, receptor type C
5777	PTPN6	protein tyrosine phosphatase, non-receptor type 6
29119	CTNNA3	catenin alpha 3
5770	PTPN1	protein tyrosine phosphatase, non-receptor type 1
8735	MYH13	myosin, heavy chain 13, skeletal muscle
2244	FGB	fibrinogen beta chain
5327	PLAT	plasminogen activator, tissue type
2152	F3	coagulation factor III, tissue factor
2155	F7	coagulation factor VII
5328	PLAU	plasminogen activator, urokinase
2159	F10	coagulation factor X
2	A2M	alpha-2-macroglobulin
1378	CR1	complement component 3b/4b receptor 1 (Knops blood group)
2162	F13A1	coagulation factor XIII A chain
2266	FGG	fibrinogen gamma chain
3075	CFH	complement factor H
629	CFB	complement factor B
2243	FGA	fibrinogen alpha chain
462	SERPINC1	serpin peptidase inhibitor, clade C (antithrombin), member 1
718	C3	complement component 3
715	C1R	complement C1r subcomponent
7056	THBD	thrombomodulin
1385	CREB1	cAMP responsive element binding protein 1
4261	CIITA	class II, major histocompatibility complex, transactivator
5972	REN	renin
183	AGT	angiotensinogen
1636	ACE	angiotensin I converting enzyme
4311	MME	membrane metallo-endopeptidase
7187	TRAF3	TNF receptor associated factor 3
7099	TLR4	toll like receptor 4
22900	CARD8	caspase recruitment domain family member 8
4210	MEFV	Mediterranean fever
7128	TNFAIP3	TNF alpha induced protein 3
5300	PIN1	peptidylprolyl cis/trans isomerase, NIMA-interacting 1
90865	IL33	interleukin 33
945	CD33	CD33 molecule
928	CD9	CD9 molecule
4277	MICB	MHC class I polypeptide-related sequence B
100507436	MICA	MHC class I polypeptide-related sequence A
9846	GAB2	GRB2 associated binding protein 2
4651	MYO10	myosin X
4313	MMP2	matrix metallopeptidase 2
4318	MMP9	matrix metallopeptidase 9
8660	IRS2	insulin receptor substrate 2
3667	IRS1	insulin receptor substrate 1
8471	IRS4	insulin receptor substrate 4
10891	PPARGC1A	PPARG coactivator 1 alpha
5565	PRKAB2	protein kinase AMP-activated non-catalytic subunit beta 2
5564	PRKAB1	protein kinase AMP-activated non-catalytic subunit beta 1
6517	SLC2A4	solute carrier family 2 member 4
53632	PRKAG3	protein kinase AMP-activated non-catalytic subunit gamma 3
5506	PPP1R3A	protein phosphatase 1 regulatory subunit 3A
6720	SREBF1	sterol regulatory element binding transcription factor 1
1906	EDN1	endothelin 1
6513	SLC2A1	solute carrier family 2 member 1
79602	ADIPOR2	adiponectin receptor 2
51094	ADIPOR1	adiponectin receptor 1
3767	KCNJ11	potassium voltage-gated channel subfamily J member 11
1363	CPE	carboxypeptidase E
3087	HHEX	hematopoietically expressed homeobox
6927	HNF1A	HNF1 homeobox A
3172	HNF4A	hepatocyte nuclear factor 4 alpha
25825	BACE2	beta-site APP-cleaving enzyme 2
4035	LRP1	LDL receptor related protein 1
348	APOE	apolipoprotein E
3416	IDE	insulin degrading enzyme
8851	CDK5R1	cyclin-dependent kinase 5, regulatory subunit 1 (p35)
23621	BACE1	beta-site APP-cleaving enzyme 1
322	APBB1	amyloid beta precursor protein binding family B member 1
6622	SNCA	synuclein alpha
351	APP	amyloid beta precursor protein
6531	SLC6A3	solute carrier family 6 member 3
120892	LRRK2	leucine-rich repeat kinase 2
10452	TOMM40	translocase of outer mitochondrial membrane 40
4899	NRF1	nuclear respiratory factor 1
7019	TFAM	transcription factor A, mitochondrial
5621	PRNP	prion protein
375	ARF1	ADP ribosylation factor 1
7188	TRAF5	TNF receptor associated factor 5
7185	TRAF1	TNF receptor associated factor 1
613	BCR	breakpoint cluster region
5915	RARB	retinoic acid receptor beta
5914	RARA	retinoic acid receptor alpha
1612	DAPK1	death-associated protein kinase 1
9618	TRAF4	TNF receptor associated factor 4
1050	CEBPA	CCAAT/enhancer binding protein alpha
4000	LMNA	lamin A/C
58	ACTA1	actin, alpha 1, skeletal muscle
5786	PTPRA	protein tyrosine phosphatase, receptor type A
9918	NCAPD2	non-SMC condensin I complex subunit D2
4879	NPPB	natriuretic peptide B
2099	ESR1	estrogen receptor 1
7490	WT1	Wilms tumor 1
274	BIN1	bridging integrator 1
8301	PICALM	phosphatidylinositol binding clathrin assembly protein
2623	GATA1	GATA binding protein 1
1728	NQO1	NAD(P)H dehydrogenase, quinone 1
1959	EGR2	early growth response 2
1960	EGR3	early growth response 3
9971	NR1H4	nuclear receptor subfamily 1 group H member 4
5116	PCNT	pericentrin
6945	MLX	MLX, MAX dimerization protein
51085	MLXIPL	MLX interacting protein-like
23411	SIRT1	sirtuin 1
1390	CREM	cAMP responsive element modulator
8038	ADAM12	ADAM metallopeptidase domain 12
3557	IL1RN	interleukin 1 receptor antagonist
1859	DYRK1A	dual specificity tyrosine phosphorylation regulated kinase 1A
7018	TF	transferrin
3484	IGFBP1	insulin like growth factor binding protein 1
22937	SCAP	SREBF chaperone
4018	LPA	lipoprotein, Lp(a)
860	RUNX2	runt related transcription factor 2
7421	VDR	vitamin D (1,25- dihydroxyvitamin D3) receptor
83464	APH1B	aph-1 homolog B, gamma secretase subunit
1464	CSPG4	chondroitin sulfate proteoglycan 4
9518	GDF15	growth differentiation factor 15
8682	PEA15	phosphoprotein enriched in astrocytes 15
2100	ESR2	estrogen receptor 2 (ER beta)
5451	POU2F1	POU class 2 homeobox 1
7392	USF2	upstream transcription factor 2, c-fos interacting
7804	LRP8	LDL receptor related protein 8
4043	LRPAP1	LDL receptor related protein associated protein 1
7436	VLDLR	very low density lipoprotein receptor
3487	IGFBP4	insulin like growth factor binding protein 4
23268	DNMBP	dynamin binding protein
57787	MARK4	microtubule affinity regulating kinase 4
51378	ANGPT4	angiopoietin 4
10817	FRS3	fibroblast growth factor receptor substrate 3
7024	TFCP2	transcription factor CP2
7276	TTR	transthyretin
1052	CEBPD	CCAAT/enhancer binding protein delta
29979	UBQLN1	ubiquilin 1
7178	TPT1	tumor protein, translationally-controlled 1
3481	IGF2	insulin like growth factor 2
4314	MMP3	matrix metallopeptidase 3
177	AGER	advanced glycosylation end product-specific receptor
338	APOB	apolipoprotein B
7376	NR1H2	nuclear receptor subfamily 1 group H member 2
5916	RARG	retinoic acid receptor gamma
7076	TIMP1	TIMP metallopeptidase inhibitor 1
197	AHSG	alpha-2-HS-glycoprotein
1401	CRP	C-reactive protein, pentraxin-related
846	CASR	calcium sensing receptor
4353	MPO	myeloperoxidase
6461	SHB	Src homology 2 domain containing adaptor protein B
3856	KRT8	keratin 8
7391	USF1	upstream transcription factor 1
1191	CLU	clusterin
6046	BRD2	bromodomain containing 2
79001	VKORC1	vitamin K epoxide reductase complex subunit 1
2638	GC	group-specific component (vitamin D binding protein)
6770	STAR	steroidogenic acute regulatory protein
57761	TRIB3	tribbles pseudokinase 3
688	KLF5	Kruppel-like factor 5 (intestinal)
7352	UCP3	uncoupling protein 3 (mitochondrial, proton carrier)
1009	CDH11	cadherin 11
27131	SNX5	sorting nexin 5
388552	BLOC1S3	biogenesis of lysosomal organelles complex 1 subunit 3
133522	PPARGC1B	PPARG coactivator 1 beta
4325	MMP16	matrix metallopeptidase 16
7077	TIMP2	TIMP metallopeptidase inhibitor 2
23286	WWC1	WW and C2 domain containing 1
10536	P3H3	prolyl 3-hydroxylase 3
649	BMP1	bone morphogenetic protein 1
84570	COL25A1	collagen type XXV alpha 1
176	ACAN	aggrecan
3832	KIF11	kinesin family member 11
5725	PTBP1	polypyrimidine tract binding protein 1
7767	ZNF224	zinc finger protein 224
6678	SPARC	secreted protein acidic and cysteine rich
5122	PCSK1	proprotein convertase subtilisin/kexin type 1
6539	SLC6A12	solute carrier family 6 member 12
6572	SLC18A3	solute carrier family 18 member A3
1071	CETP	cholesteryl ester transfer protein, plasma
344	APOC2	apolipoprotein C-II
949	SCARB1	scavenger receptor class B member 1
26330	GAPDHS	glyceraldehyde-3-phosphate dehydrogenase, spermatogenic
2691	GHRH	growth hormone releasing hormone
5741	PTH	parathyroid hormone
64805	P2RY12	purinergic receptor P2Y12
6750	SST	somatostatin
3485	IGFBP2	insulin like growth factor binding protein 2
3488	IGFBP5	insulin like growth factor binding protein 5
3489	IGFBP6	insulin like growth factor binding protein 6
5126	PCSK2	proprotein convertase subtilisin/kexin type 2
590	BCHE	butyrylcholinesterase
6568	SLC17A1	solute carrier family 17 member 1
79895	ATP8B4	ATPase phospholipid transporting 8B4 (putative)
89872	AQP10	aquaporin 10
64216	TFB2M	transcription factor B2, mitochondrial
6041	RNASEL	ribonuclease L
642	BLMH	bleomycin hydrolase
1471	CST3	cystatin C
2006	ELN	elastin
10631	POSTN	periostin, osteoblast specific factor
80737	VWA7	von Willebrand factor A domain containing 7
144568	A2ML1	alpha-2-macroglobulin like 1
8754	ADAM9	ADAM metallopeptidase domain 9
10047	CST8	cystatin 8
5654	HTRA1	HtrA serine peptidase 1
4327	MMP19	matrix metallopeptidase 19
5858	PZP	pregnancy-zone protein
12	SERPINA3	serpin peptidase inhibitor, clade A (alpha-1 antiproteinase, antitrypsin), member 3
5068	REG3A	regenerating family member 3 alpha
651	BMP3	bone morphogenetic protein 3
6277	S100A6	S100 calcium binding protein A6
