# Supplementary material for: The Pathway Coexpression Network: Revealing pathway relationships
Source: PLoS Comput Biol. 2018 Mar 19;14(3):e1006042. doi: 10.1371/journal.pcbi.1006042 (PMC5875878; doi:10.1371/journal.pcbi.1006042)
Supplement: S7 Table — (XLSX) [file pcbi.1006042.s010.xlsx]

## Sheet: pcxn_GAD_enrich_barcode_sig.csv
Pathway	n_genes	n_gad_genes	pct_gad_genes	OR	p_Fisher	p_Adjust
REACTOME_REGULATED_PROTEOLYSIS_OF_P75NTR	10	9	0.9	345.319	4.60979e-14	1.25217e-12
REACTOME_PROSTANOID_LIGAND_RECEPTORS	9	7	0.777778	133.554	2.51021e-10	3.71232e-09
REACTOME_HDL_MEDIATED_LIPID_TRANSPORT	15	11	0.733333	105.902	3.76387e-15	1.47344e-13
PID_RXR_VDR_PATHWAY	26	18	0.692308	87.7704	2.46821e-23	3.65021e-21
BIOCARTA_FIBRINOLYSIS_PATHWAY	12	8	0.666667	76.5982	8.38843e-11	1.36159e-09
REACTOME_SIGNALING_BY_NOTCH4	12	8	0.666667	76.5982	8.38843e-11	1.36159e-09
REACTOME_LIPOPROTEIN_METABOLISM	28	18	0.642857	70.2518	1.97653e-22	2.63076e-20
REACTOME_NRIF_SIGNALS_CELL_DEATH_FROM_THE_NUCLEUS	14	9	0.642857	69.0643	8.41503e-12	1.57752e-10
REACTOME_REGULATION_OF_INSULIN_LIKE_GROWTH_FACTOR_IGF_ACTIVITY_BY_INSULIN_LIKE_GROWTH_FACTOR_BINDING_PROTEINS_IGFBPS	16	10	0.625	64.01	8.33192e-13	1.8483e-11
REACTOME_CHYLOMICRON_MEDIATED_LIPID_TRANSPORT	16	10	0.625	64.01	8.33192e-13	1.8483e-11
BIOCARTA_EXTRINSIC_PATHWAY	13	8	0.615385	61.3912	2.13178e-10	3.22432e-09
BIOCARTA_ASBCELL_PATHWAY	12	7	0.583333	53.5088	5.16195e-09	5.67815e-08
REACTOME_SIGNALING_BY_NOTCH2	12	7	0.583333	53.5088	5.16195e-09	5.67815e-08
REACTOME_SIGNALING_BY_NOTCH3	12	7	0.583333	53.5088	5.16195e-09	5.67815e-08
BIOCARTA_TH1TH2_PATHWAY	19	11	0.578947	52.9416	1.89776e-13	4.85755e-12
BIOCARTA_CYTOKINE_PATHWAY	21	12	0.571429	51.4176	1.81947e-14	5.90661e-13
REACTOME_COMMON_PATHWAY	14	8	0.571429	51.0355	4.86196e-10	6.76369e-09
BIOCARTA_INFLAM_PATHWAY	29	16	0.551724	47.8335	1.52311e-18	1.01363e-16
BIOCARTA_LEPTIN_PATHWAY	11	6	0.545455	45.7672	1.18325e-07	9.05119e-07
BIOCARTA_ERYTH_PATHWAY	15	8	0.533333	43.7296	1.01835e-09	1.27871e-08
BIOCARTA_LONGEVITY_PATHWAY	15	8	0.533333	43.7296	1.01835e-09	1.27871e-08
REACTOME_EICOSANOID_LIGAND_BINDING_RECEPTORS	15	8	0.533333	43.7296	1.01835e-09	1.27871e-08
BIOCARTA_NKT_PATHWAY	29	15	0.517241	41.5469	6.78316e-17	3.61135e-15
PID_REELIN_PATHWAY	29	15	0.517241	41.5469	6.78316e-17	3.61135e-15
SA_MMP_CYTOKINE_CONNECTION	14	7	0.5	38.2216	2.13849e-08	1.97661e-07
BIOCARTA_TRKA_PATHWAY	12	6	0.5	38.1511	2.31488e-07	1.66546e-06
BIOCARTA_IL5_PATHWAY	10	5	0.5	38.0808	2.53349e-06	1.43493e-05
BIOCARTA_TID_PATHWAY	19	9	0.473684	34.5352	3.46013e-10	4.95208e-09
REACTOME_LIPID_DIGESTION_MOBILIZATION_AND_TRANSPORT	45	21	0.466667	34.342	6.26141e-22	6.49516e-20
BIOCARTA_LAIR_PATHWAY	17	8	0.470588	34.0464	3.67563e-09	4.21746e-08
BIOCARTA_PML_PATHWAY	17	8	0.470588	34.0464	3.67563e-09	4.21746e-08
BIOCARTA_STEM_PATHWAY	15	7	0.466667	33.4533	3.92055e-08	3.47884e-07
KEGG_ADIPOCYTOKINE_SIGNALING_PATHWAY	67	30	0.447761	32.3779	4.01763e-30	1.78249e-27
BIOCARTA_BLYMPHOCYTE_PATHWAY	11	5	0.454545	31.7448	4.54613e-06	2.3729e-05
BIOCARTA_P35ALZHEIMERS_PATHWAY	11	5	0.454545	31.7448	4.54613e-06	2.3729e-05
BIOCARTA_IL4_PATHWAY	11	5	0.454545	31.7448	4.54613e-06	2.3729e-05
BIOCARTA_CARDIACEGF_PATHWAY	18	8	0.444444	30.6509	6.46704e-09	6.80026e-08
REACTOME_ACTIVATED_AMPK_STIMULATES_FATTY_ACID_OXIDATION_IN_MUSCLE	18	8	0.444444	30.6509	6.46704e-09	6.80026e-08
BIOCARTA_GH_PATHWAY	28	12	0.428571	28.9225	1.59723e-12	3.37447e-11
BIOCARTA_GRANULOCYTES_PATHWAY	14	6	0.428571	28.6107	7.19895e-07	4.74346e-06
BIOCARTA_NUCLEARRS_PATHWAY	14	6	0.428571	28.6107	7.19895e-07	4.74346e-06
BIOCARTA_CARM1_PATHWAY	12	5	0.416667	27.2101	7.62801e-06	3.76033e-05
PID_SYNDECAN_3_PATHWAY	17	7	0.411765	26.7653	1.13283e-07	8.76623e-07
PID_HNF3B_PATHWAY	45	18	0.4	26.031	1.72164e-17	1.04159e-15
BIOCARTA_AMI_PATHWAY	20	8	0.4	25.5357	1.7788e-08	1.69113e-07
BIOCARTA_IGF1MTOR_PATHWAY	20	8	0.4	25.5357	1.7788e-08	1.69113e-07
REACTOME_GRB2_SOS_PROVIDES_LINKAGE_TO_MAPK_SIGNALING_FOR_INTERGRINS_	15	6	0.4	25.4409	1.17369e-06	7.47453e-06
BIOCARTA_FREE_PATHWAY	10	4	0.4	25.3466	8.11373e-05	0.000309438
BIOCARTA_SODD_PATHWAY	10	4	0.4	25.3466	8.11373e-05	0.000309438
REACTOME_GAMMA_CARBOXYLATION_TRANSPORT_AND_AMINO_TERMINAL_CLEAVAGE_OF_PROTEINS	10	4	0.4	25.3466	8.11373e-05	0.000309438
REACTOME_ABACAVIR_TRANSPORT_AND_METABOLISM	10	4	0.4	25.3466	8.11373e-05	0.000309438
REACTOME_ACETYLCHOLINE_NEUROTRANSMITTER_RELEASE_CYCLE	10	4	0.4	25.3466	8.11373e-05	0.000309438
REACTOME_REGULATION_OF_RHEB_GTPASE_ACTIVITY_BY_AMPK	10	4	0.4	25.3466	8.11373e-05	0.000309438
BIOCARTA_NFKB_PATHWAY	23	9	0.391304	24.6601	2.79145e-09	3.37765e-08
BIOCARTA_TNFR2_PATHWAY	18	7	0.388889	24.3152	1.81256e-07	1.35535e-06
PID_SHP2_PATHWAY	58	22	0.37931	24.0117	1.73457e-20	1.53914e-18
BIOCARTA_ACE2_PATHWAY	13	5	0.384615	23.817	1.21327e-05	5.60716e-05
REACTOME_REGULATION_OF_IFNG_SIGNALING	13	5	0.384615	23.817	1.21327e-05	5.60716e-05
PID_TCR_CALCIUM_PATHWAY	29	11	0.37931	23.5422	6.87481e-11	1.1438e-09
REACTOME_FORMATION_OF_FIBRIN_CLOT_CLOTTING_CASCADE	32	12	0.375	23.1537	1.07907e-11	1.96746e-10
BIOCARTA_RELA_PATHWAY	16	6	0.375	22.9002	1.83701e-06	1.10138e-05
KEGG_TYPE_I_DIABETES_MELLITUS	41	15	0.365854	22.3866	4.17119e-14	1.15664e-12
PID_AMB2_NEUTROPHILS_PATHWAY	41	15	0.365854	22.3866	4.17119e-14	1.15664e-12
BIOCARTA_DC_PATHWAY	22	8	0.363636	21.8894	4.31438e-08	3.68105e-07
PID_PDGFRA_PATHWAY	22	8	0.363636	21.8894	4.31438e-08	3.68105e-07
BIOCARTA_LYM_PATHWAY	11	4	0.363636	21.7307	0.000124904	0.000454226
BIOCARTA_TCRA_PATHWAY	11	4	0.363636	21.7307	0.000124904	0.000454226
BIOCARTA_EGFR_SMRTE_PATHWAY	11	4	0.363636	21.7307	0.000124904	0.000454226
BIOCARTA_CDK5_PATHWAY	11	4	0.363636	21.7307	0.000124904	0.000454226
REACTOME_SIGNALING_BY_ACTIVATED_POINT_MUTANTS_OF_FGFR1	11	4	0.363636	21.7307	0.000124904	0.000454226
REACTOME_SIGNALING_BY_FGFR3_MUTANTS	11	4	0.363636	21.7307	0.000124904	0.000454226
REACTOME_HIGHLY_CALCIUM_PERMEABLE_POSTSYNAPTIC_NICOTINIC_ACETYLCHOLINE_RECEPTORS	11	4	0.363636	21.7307	0.000124904	0.000454226
BIOCARTA_PLATELETAPP_PATHWAY	14	5	0.357143	21.1655	1.84731e-05	8.19591e-05
REACTOME_SYNTHESIS_SECRETION_AND_DEACYLATION_OF_GHRELIN	14	5	0.357143	21.1655	1.84731e-05	8.19591e-05
REACTOME_REGULATION_OF_AMPK_ACTIVITY_VIA_LKB1	14	5	0.357143	21.1655	1.84731e-05	8.19591e-05
PID_IL23_PATHWAY	37	13	0.351351	20.9402	3.8986e-12	7.74483e-11
KEGG_RENIN_ANGIOTENSIN_SYSTEM	17	6	0.352941	20.8185	2.77722e-06	1.5402e-05
BIOCARTA_CK1_PATHWAY	17	6	0.352941	20.8185	2.77722e-06	1.5402e-05
BIOCARTA_ARF_PATHWAY	17	6	0.352941	20.8185	2.77722e-06	1.5402e-05
SA_TRKA_RECEPTOR	17	6	0.352941	20.8185	2.77722e-06	1.5402e-05
PID_INTEGRIN2_PATHWAY	29	10	0.344828	20.2349	1.54068e-09	1.89875e-08
REACTOME_NUCLEAR_RECEPTOR_TRANSCRIPTION_PATHWAY	47	16	0.340426	20.063	2.19753e-14	6.96408e-13
PID_FRA_PATHWAY	36	12	0.333333	19.2934	5.44511e-11	9.41226e-10
PID_AP1_PATHWAY	70	23	0.328571	19.2704	1.05092e-19	8.74235e-18
PID_IGF1_PATHWAY	30	10	0.333333	19.2231	2.258e-09	2.75725e-08
SIG_IL4RECEPTOR_IN_B_LYPHOCYTES	27	9	0.333333	19.1882	1.46016e-08	1.41859e-07
PID_GLYPICAN_1PATHWAY	27	9	0.333333	19.1882	1.46016e-08	1.41859e-07
REACTOME_INTEGRIN_ALPHAIIB_BETA3_SIGNALING	27	9	0.333333	19.1882	1.46016e-08	1.41859e-07
REACTOME_GROWTH_HORMONE_RECEPTOR_SIGNALING	24	8	0.333333	19.1534	9.48153e-08	7.55683e-07
BIOCARTA_IGF1_PATHWAY	21	7	0.333333	19.1187	6.19173e-07	4.1413e-06
BIOCARTA_ERK5_PATHWAY	18	6	0.333333	19.0842	4.07521e-06	2.17835e-05
BIOCARTA_CD40_PATHWAY	15	5	0.333333	19.0498	2.71228e-05	0.000116453
BIOCARTA_TALL1_PATHWAY	15	5	0.333333	19.0498	2.71228e-05	0.000116453
REACTOME_P130CAS_LINKAGE_TO_MAPK_SIGNALING_FOR_INTEGRINS	15	5	0.333333	19.0498	2.71228e-05	0.000116453
REACTOME_PLATELET_ADHESION_TO_EXPOSED_COLLAGEN	12	4	0.333333	19.0155	0.000183542	0.000642878
REACTOME_FGFR2C_LIGAND_BINDING_AND_ACTIVATION	12	4	0.333333	19.0155	0.000183542	0.000642878
BIOCARTA_NEUROTRANSMITTERS_PATHWAY	6	2	0.333333	18.9473	0.00929349	0.0210348
KEGG_TYPE_II_DIABETES_MELLITUS	46	15	0.326087	18.7738	2.98825e-13	7.36548e-12
PID_CD40_PATHWAY	31	10	0.322581	18.3078	3.25678e-09	3.87034e-08
PID_IL12_2PATHWAY	63	20	0.31746	18.2127	5.71997e-17	3.31012e-15
PID_NFAT_TFPATHWAY	47	15	0.319149	18.1868	4.28598e-13	1.03721e-11
PID_LIS1_PATHWAY	28	9	0.321429	18.1784	2.10288e-08	1.9573e-07
REACTOME_SIGNALING_BY_FGFR1_MUTANTS	28	9	0.321429	18.1784	2.10288e-08	1.9573e-07
BIOCARTA_P53HYPOXIA_PATHWAY	22	7	0.318182	17.8446	8.87987e-07	5.73743e-06
BIOCARTA_INSULIN_PATHWAY	22	7	0.318182	17.8446	8.87987e-07	5.73743e-06
REACTOME_NUCLEAR_SIGNALING_BY_ERBB4	38	12	0.315789	17.8091	1.12376e-10	1.78062e-09
KEGG_ALLOGRAFT_REJECTION	35	11	0.314286	17.6533	7.20595e-10	9.688e-09
BIOCARTA_GCR_PATHWAY	19	6	0.315789	17.6169	5.82656e-06	2.97132e-05
BIOCARTA_CTLA4_PATHWAY	19	6	0.315789	17.6169	5.82656e-06	2.97132e-05
REACTOME_STEROID_HORMONES	29	9	0.310345	17.2697	2.97984e-08	2.66186e-07
PID_IL27_PATHWAY	26	8	0.307692	17.0259	1.92448e-07	1.42304e-06
REACTOME_ACTIVATED_NOTCH1_TRANSMITS_SIGNAL_TO_THE_NUCLEUS	26	8	0.307692	17.0259	1.92448e-07	1.42304e-06
REACTOME_AMINE_LIGAND_BINDING_RECEPTORS	36	11	0.305556	16.9472	1.0137e-09	1.27871e-08
REACTOME_PLATELET_AGGREGATION_PLUG_FORMATION	36	11	0.305556	16.9472	1.0137e-09	1.27871e-08
REACTOME_EXTRINSIC_PATHWAY_FOR_APOPTOSIS	13	4	0.307692	16.9042	0.000259723	0.000862074
REACTOME_REGULATION_OF_COMPLEMENT_CASCADE	13	4	0.307692	16.9042	0.000259723	0.000862074
REACTOME_SIGNAL_ATTENUATION	13	4	0.307692	16.9042	0.000259723	0.000862074
BIOCARTA_CTCF_PATHWAY	23	7	0.304348	16.7298	1.24819e-06	7.72717e-06
BIOCARTA_IGF1R_PATHWAY	23	7	0.304348	16.7298	1.24819e-06	7.72717e-06
PID_IL12_STAT4_PATHWAY	33	10	0.30303	16.716	6.4886e-09	6.80026e-08
PID_RETINOIC_ACID_PATHWAY	30	9	0.3	16.4476	4.16015e-08	3.61906e-07
PID_IL2_STAT5_PATHWAY	30	9	0.3	16.4476	4.16015e-08	3.61906e-07
PID_LKB1_PATHWAY	47	14	0.297872	16.4293	7.58928e-12	1.44305e-10
PID_IL6_7_PATHWAY	47	14	0.297872	16.4293	7.58928e-12	1.44305e-10
REACTOME_INSULIN_SYNTHESIS_AND_PROCESSING	20	6	0.3	16.3593	8.14273e-06	3.99925e-05
KEGG_COMPLEMENT_AND_COAGULATION_CASCADES	68	20	0.294118	16.3136	3.08955e-16	1.418e-14
REACTOME_PI3K_CASCADE	68	20	0.294118	16.3136	3.08955e-16	1.418e-14
BIOCARTA_EPHA4_PATHWAY	10	3	0.3	16.272	0.0017872	0.00491479
REACTOME_ANDROGEN_BIOSYNTHESIS	10	3	0.3	16.272	0.0017872	0.00491479
REACTOME_NFKB_IS_ACTIVATED_AND_SIGNALS_SURVIVAL	10	3	0.3	16.272	0.0017872	0.00491479
REACTOME_NOREPINEPHRINE_NEUROTRANSMITTER_RELEASE_CYCLE	10	3	0.3	16.272	0.0017872	0.00491479
REACTOME_HORMONE_LIGAND_BINDING_RECEPTORS	10	3	0.3	16.272	0.0017872	0.00491479
REACTOME_IL_RECEPTOR_SHC_SIGNALING	27	8	0.296296	16.1301	2.6733e-07	1.90276e-06
KEGG_PPAR_SIGNALING_PATHWAY	69	20	0.289855	15.9803	4.24773e-16	1.88458e-14
KEGG_ONE_CARBON_POOL_BY_FOLATE	17	5	0.294118	15.8684	5.35494e-05	0.000212759
BIOCARTA_HCMV_PATHWAY	17	5	0.294118	15.8684	5.35494e-05	0.000212759
BIOCARTA_IL10_PATHWAY	17	5	0.294118	15.8684	5.35494e-05	0.000212759
BIOCARTA_41BB_PATHWAY	17	5	0.294118	15.8684	5.35494e-05	0.000212759
REACTOME_SIGNALING_BY_FGFR1_FUSION_MUTANTS	17	5	0.294118	15.8684	5.35494e-05	0.000212759
REACTOME_ENERGY_DEPENDENT_REGULATION_OF_MTOR_BY_LKB1_AMPK	17	5	0.294118	15.8684	5.35494e-05	0.000212759
BIOCARTA_EIF4_PATHWAY	24	7	0.291667	15.7378	1.72311e-06	1.04724e-05
REACTOME_METABOLISM_OF_STEROID_HORMONES_AND_VITAMINS_A_AND_D	35	10	0.285714	15.3705	1.22858e-08	1.24827e-07
BIOCARTA_HER2_PATHWAY	21	6	0.285714	15.2608	1.11522e-05	5.2094e-05
BIOCARTA_TFF_PATHWAY	21	6	0.285714	15.2608	1.11522e-05	5.2094e-05
REACTOME_CD28_DEPENDENT_PI3K_AKT_SIGNALING	21	6	0.285714	15.2608	1.11522e-05	5.2094e-05
PID_IL4_2PATHWAY	64	18	0.28125	15.2554	2.29553e-14	7.10548e-13
BIOCARTA_RANKL_PATHWAY	14	4	0.285714	15.2066	0.000356223	0.00115288
BIOCARTA_PS1_PATHWAY	14	4	0.285714	15.2066	0.000356223	0.00115288
REACTOME_ACETYLCHOLINE_BINDING_AND_DOWNSTREAM_EVENTS	14	4	0.285714	15.2066	0.000356223	0.00115288
REACTOME_CRMPS_IN_SEMA3A_SIGNALING	14	4	0.285714	15.2066	0.000356223	0.00115288
REACTOME_FGFR1_LIGAND_BINDING_AND_ACTIVATION	14	4	0.285714	15.2066	0.000356223	0.00115288
BIOCARTA_PPARA_PATHWAY	57	16	0.280702	15.1587	6.67165e-13	1.55789e-11
REACTOME_NEGATIVE_REGULATION_OF_THE_PI3K_AKT_NETWORK	7	2	0.285714	15.1528	0.0127899	0.0279531
PID_INTEGRIN_A9B1_PATHWAY	25	7	0.28	14.8634	2.3402e-06	1.3484e-05
PID_LYMPH_ANGIOGENESIS_PATHWAY	25	7	0.28	14.8634	2.3402e-06	1.3484e-05
KEGG_LEISHMANIA_INFECTION	69	19	0.275362	14.841	6.67219e-15	2.46686e-13
PID_P75_NTR_PATHWAY	69	19	0.275362	14.841	6.67219e-15	2.46686e-13
REACTOME_PI3K_AKT_ACTIVATION	36	10	0.277778	14.779	1.66212e-08	1.6031e-07
BIOCARTA_NGF_PATHWAY	18	5	0.277778	14.648	7.25779e-05	0.00028246
SIG_INSULIN_RECEPTOR_PATHWAY_IN_CARDIAC_MYOCYTES	51	14	0.27451	14.6442	2.61219e-11	4.63576e-10
PID_HIF1_TFPATHWAY	66	18	0.272727	14.6188	4.16163e-14	1.15664e-12
PID_IFNG_PATHWAY	40	11	0.275	14.6013	3.55271e-09	4.14794e-08
KEGG_THYROID_CANCER	29	8	0.275862	14.5863	4.93871e-07	3.33676e-06
BIOCARTA_IL1R_PATHWAY	33	9	0.272727	14.3846	1.04671e-07	8.29267e-07
BIOCARTA_CSK_PATHWAY	22	6	0.272727	14.3084	1.50012e-05	6.81455e-05
BIOCARTA_AKT_PATHWAY	22	6	0.272727	14.3084	1.50012e-05	6.81455e-05
REACTOME_FGFR_LIGAND_BINDING_AND_ACTIVATION	22	6	0.272727	14.3084	1.50012e-05	6.81455e-05
BIOCARTA_SRCRPTP_PATHWAY	11	3	0.272727	14.233	0.00241056	0.00642976
BIOCARTA_MONOCYTE_PATHWAY	11	3	0.272727	14.233	0.00241056	0.00642976
REACTOME_P75NTR_RECRUITS_SIGNALLING_COMPLEXES	11	3	0.272727	14.233	0.00241056	0.00642976
REACTOME_RECEPTOR_LIGAND_BINDING_INITIATES_THE_SECOND_PROTEOLYTIC_CLEAVAGE_OF_NOTCH_RECEPTOR	11	3	0.272727	14.233	0.00241056	0.00642976
PID_ER_NONGENOMIC_PATHWAY	41	11	0.268293	14.1159	4.74334e-09	5.35608e-08
BIOCARTA_BAD_PATHWAY	26	7	0.269231	14.0829	3.13148e-06	1.69431e-05
PID_INSULIN_GLUCOSE_PATHWAY	26	7	0.269231	14.0829	3.13148e-06	1.69431e-05
BIOCARTA_NO1_PATHWAY	30	8	0.266667	13.925	6.58332e-07	4.3812e-06
KEGG_TERPENOID_BACKBONE_BIOSYNTHESIS	15	4	0.266667	13.827	0.000475896	0.0014904
BIOCARTA_HIF_PATHWAY	15	4	0.266667	13.827	0.000475896	0.0014904
BIOCARTA_HSP27_PATHWAY	15	4	0.266667	13.827	0.000475896	0.0014904
REACTOME_ENDOGENOUS_STEROLS	15	4	0.266667	13.827	0.000475896	0.0014904
PID_IL1_PATHWAY	34	9	0.264706	13.8104	1.39119e-07	1.04614e-06
PID_IL2_PI3K_PATHWAY	34	9	0.264706	13.8104	1.39119e-07	1.04614e-06
KEGG_GRAFT_VERSUS_HOST_DISEASE	38	10	0.263158	13.7252	2.95115e-08	2.65404e-07
PID_P38_ALPHA_BETA_DOWNSTREAM_PATHWAY	38	10	0.263158	13.7252	2.95115e-08	2.65404e-07
PID_UPA_UPAR_PATHWAY	42	11	0.261905	13.661	6.27819e-09	6.73893e-08
REACTOME_SIGNALING_BY_FGFR_MUTANTS	42	11	0.261905	13.661	6.27819e-09	6.73893e-08
BIOCARTA_NKCELLS_PATHWAY	19	5	0.263158	13.6043	9.64177e-05	0.000361499
BIOCARTA_TOB1_PATHWAY	19	5	0.263158	13.6043	9.64177e-05	0.000361499
REACTOME_REGULATION_OF_GENE_EXPRESSION_IN_BETA_CELLS	19	5	0.263158	13.6043	9.64177e-05	0.000361499
PID_ANGIOPOIETIN_RECEPTOR_PATHWAY	50	13	0.26	13.5752	2.85777e-10	4.17989e-09
KEGG_ARACHIDONIC_ACID_METABOLISM	54	14	0.259259	13.5472	6.10851e-11	1.02917e-09
PID_FGF_PATHWAY	54	14	0.259259	13.5472	6.10851e-11	1.02917e-09
BIOCARTA_GLEEVEC_PATHWAY	23	6	0.26087	13.4681	1.98552e-05	8.72188e-05
BIOCARTA_INTRINSIC_PATHWAY	23	6	0.26087	13.4681	1.98552e-05	8.72188e-05
BIOCARTA_GSK3_PATHWAY	27	7	0.259259	13.3796	4.13393e-06	2.18344e-05
BIOCARTA_CREB_PATHWAY	27	7	0.259259	13.3796	4.13393e-06	2.18344e-05
PID_IL3_PATHWAY	27	7	0.259259	13.3796	4.13393e-06	2.18344e-05
REACTOME_IL_3_5_AND_GM_CSF_SIGNALING	43	11	0.255814	13.2342	8.24172e-09	8.43826e-08
SIG_PIP3_SIGNALING_IN_CARDIAC_MYOCTES	67	17	0.253731	13.231	7.83131e-13	1.79715e-11
PID_PTP1B_PATHWAY	52	13	0.25	12.8787	4.8784e-10	6.76369e-09
PID_REG_GR_PATHWAY	81	20	0.246914	12.8273	1.29415e-14	4.30628e-13
PID_PI3K_PLC_TRK_PATHWAY	36	9	0.25	12.7875	2.3849e-07	1.70661e-06
KEGG_ASTHMA	28	7	0.25	12.7418	5.38996e-06	2.7699e-05
REACTOME_SHC_MEDIATED_CASCADE	28	7	0.25	12.7418	5.38996e-06	2.7699e-05
REACTOME_PKB_MEDIATED_EVENTS	28	7	0.25	12.7418	5.38996e-06	2.7699e-05
BIOCARTA_NTHI_PATHWAY	24	6	0.25	12.7191	2.58993e-05	0.000112653
REACTOME_RORA_ACTIVATES_CIRCADIAN_EXPRESSION	24	6	0.25	12.7191	2.58993e-05	0.000112653
BIOCARTA_BCELLSURVIVAL_PATHWAY	16	4	0.25	12.6739	0.000621656	0.00189776
REACTOME_ABCA_TRANSPORTERS_IN_LIPID_HOMEOSTASIS	16	4	0.25	12.6739	0.000621656	0.00189776
REACTOME_REGULATION_OF_KIT_SIGNALING	16	4	0.25	12.6739	0.000621656	0.00189776
REACTOME_ACTIVATED_POINT_MUTANTS_OF_FGFR2	16	4	0.25	12.6739	0.000621656	0.00189776
REACTOME_PLATELET_SENSITIZATION_BY_LDL	16	4	0.25	12.6739	0.000621656	0.00189776
KEGG_HEMATOPOIETIC_CELL_LINEAGE	86	21	0.244186	12.6617	3.57463e-15	1.44177e-13
BIOCARTA_PLCE_PATHWAY	12	3	0.25	12.6515	0.00315289	0.0080702
REACTOME_SEROTONIN_RECEPTORS	12	3	0.25	12.6515	0.00315289	0.0080702
REACTOME_PRESYNAPTIC_NICOTINIC_ACETYLCHOLINE_RECEPTORS	12	3	0.25	12.6515	0.00315289	0.0080702
REACTOME_RESOLUTION_OF_AP_SITES_VIA_THE_SINGLE_NUCLEOTIDE_REPLACEMENT_PATHWAY	12	3	0.25	12.6515	0.00315289	0.0080702
REACTOME_FGFR4_LIGAND_BINDING_AND_ACTIVATION	12	3	0.25	12.6515	0.00315289	0.0080702
REACTOME_ENDOSOMAL_VACUOLAR_PATHWAY	8	2	0.25	12.6291	0.0167643	0.0360474
BIOCARTA_NFAT_PATHWAY	53	13	0.245283	12.5541	6.3133e-10	8.66288e-09
PID_INSULIN_PATHWAY	45	11	0.244444	12.4519	1.38811e-08	1.38916e-07
REACTOME_PI_3K_CASCADE	54	13	0.240741	12.2541	8.12139e-10	1.08096e-08
KEGG_SMALL_CELL_LUNG_CANCER	84	20	0.238095	12.2292	2.75472e-14	8.14784e-13
REACTOME_INSULIN_RECEPTOR_SIGNALLING_CASCADE	84	20	0.238095	12.2292	2.75472e-14	8.14784e-13
BIOCARTA_HDAC_PATHWAY	29	7	0.241379	12.1631	6.94781e-06	3.4635e-05
REACTOME_DEGRADATION_OF_THE_EXTRACELLULAR_MATRIX	29	7	0.241379	12.1631	6.94781e-06	3.4635e-05
KEGG_PROSTATE_CANCER	89	21	0.235955	12.1023	7.53892e-15	2.71197e-13
PID_ATF2_PATHWAY	59	14	0.237288	12.0404	2.22382e-10	3.32574e-09
KEGG_BLADDER_CANCER	42	10	0.238095	12.0089	8.37281e-08	6.75407e-07
BIOCARTA_IL2RB_PATHWAY	38	9	0.236842	11.905	3.9442e-07	2.72007e-06
BIOCARTA_IL12_PATHWAY	21	5	0.238095	11.904	0.000161684	0.000578497
PID_ECADHERIN_KERATINOCYTE_PATHWAY	21	5	0.238095	11.904	0.000161684	0.000578497
SIG_CD40PATHWAYMAP	34	8	0.235294	11.7824	1.86491e-06	1.10812e-05
PID_HIF2PATHWAY	34	8	0.235294	11.7824	1.86491e-06	1.10812e-05
BIOCARTA_IL7_PATHWAY	17	4	0.235294	11.7004	0.000796458	0.00235052
BIOCARTA_NO2IL12_PATHWAY	17	4	0.235294	11.7004	0.000796458	0.00235052
BIOCARTA_CCR5_PATHWAY	17	4	0.235294	11.7004	0.000796458	0.00235052
PID_ANTHRAX_PATHWAY	17	4	0.235294	11.7004	0.000796458	0.00235052
REACTOME_TIE2_SIGNALING	17	4	0.235294	11.7004	0.000796458	0.00235052
REACTOME_GABA_SYNTHESIS_RELEASE_REUPTAKE_AND_DEGRADATION	17	4	0.235294	11.7004	0.000796458	0.00235052
REACTOME_INTRINSIC_PATHWAY	17	4	0.235294	11.7004	0.000796458	0.00235052
PID_INTEGRIN3_PATHWAY	43	10	0.232558	11.6445	1.06603e-07	8.34637e-07
PID_EPHRINB_REV_PATHWAY	30	7	0.233333	11.6339	8.862e-06	4.32063e-05
RT	61	14	0.229508	11.527	3.59072e-10	5.08431e-09
BIOCARTA_VIP_PATHWAY	26	6	0.230769	11.4475	4.24012e-05	0.000174725
PID_VEGFR1_PATHWAY	26	6	0.230769	11.4475	4.24012e-05	0.000174725
PID_AJDISS_2PATHWAY	48	11	0.229167	11.444	2.88112e-08	2.62655e-07
PID_INTEGRIN1_PATHWAY	66	15	0.227273	11.4016	9.74827e-11	1.56325e-09
BIOCARTA_CTL_PATHWAY	13	3	0.230769	11.3891	0.00402085	0.0100408
REACTOME_RETROGRADE_NEUROTROPHIN_SIGNALLING	13	3	0.230769	11.3891	0.00402085	0.0100408
REACTOME_P75NTR_SIGNALS_VIA_NFKB	13	3	0.230769	11.3891	0.00402085	0.0100408
REACTOME_ACTIVATION_OF_IRF3_IRF7_MEDIATED_BY_TBK1_IKK_EPSILON	13	3	0.230769	11.3891	0.00402085	0.0100408
REACTOME_TRAF6_MEDIATED_INDUCTION_OF_TAK1_COMPLEX	13	3	0.230769	11.3891	0.00402085	0.0100408
REACTOME_INITIAL_TRIGGERING_OF_COMPLEMENT	13	3	0.230769	11.3891	0.00402085	0.0100408
REACTOME_RESPONSE_TO_ELEVATED_PLATELET_CYTOSOLIC_CA2_	80	18	0.225	11.3151	1.54523e-12	3.31726e-11
PID_HEDGEHOG_2PATHWAY	22	5	0.227273	11.2064	0.000204825	0.000709955
PID_AVB3_OPN_PATHWAY	31	7	0.225806	11.152	1.11938e-05	5.2094e-05
REACTOME_CD28_CO_STIMULATION	31	7	0.225806	11.152	1.11938e-05	5.2094e-05
REACTOME_TRANSCRIPTIONAL_REGULATION_OF_WHITE_ADIPOCYTE_DIFFERENTIATION	72	16	0.222222	11.0981	3.31959e-11	5.81365e-10
REACTOME_PHASE1_FUNCTIONALIZATION_OF_COMPOUNDS	68	15	0.220588	10.9674	1.53684e-10	2.40651e-09
REACTOME_GAB1_SIGNALOSOME	36	8	0.222222	10.9375	2.97032e-06	1.62028e-05
REACTOME_FRS2_MEDIATED_CASCADE	36	8	0.222222	10.9375	2.97032e-06	1.62028e-05
REACTOME_SIGNALING_BY_ERBB4	87	19	0.218391	10.9045	6.55503e-13	1.55789e-11
BIOCARTA_PTEN_PATHWAY	18	4	0.222222	10.8625	0.00100328	0.00290297
BIOCARTA_TEL_PATHWAY	18	4	0.222222	10.8625	0.00100328	0.00290297
REACTOME_REGULATION_OF_SIGNALING_BY_CBL	18	4	0.222222	10.8625	0.00100328	0.00290297
BIOCARTA_TCAPOPTOSIS_PATHWAY	9	2	0.222222	10.8254	0.0211897	0.0447675
PID_VEGFR1_2_PATHWAY	69	15	0.217391	10.7651	1.91771e-10	2.93388e-09
PID_SYNDECAN_4_PATHWAY	32	7	0.21875	10.7012	1.40115e-05	6.45302e-05
PID_PS1_PATHWAY	46	10	0.217391	10.6717	2.11437e-07	1.53783e-06
PID_A6B1_A6B4_INTEGRIN_PATHWAY	46	10	0.217391	10.6717	2.11437e-07	1.53783e-06
KEGG_MATURITY_ONSET_DIABETES_OF_THE_YOUNG	23	5	0.217391	10.58	0.000256206	0.000858968
BIOCARTA_MTOR_PATHWAY	23	5	0.217391	10.58	0.000256206	0.000858968
BIOCARTA_RAC1_PATHWAY	23	5	0.217391	10.58	0.000256206	0.000858968
BIOCARTA_PGC1A_PATHWAY	23	5	0.217391	10.58	0.000256206	0.000858968
PID_NFKAPPAB_CANONICAL_PATHWAY	23	5	0.217391	10.58	0.000256206	0.000858968
PID_GMCSF_PATHWAY	37	8	0.216216	10.5616	3.70475e-06	1.99637e-05
BIOCARTA_CHREBP2_PATHWAY	42	9	0.214286	10.4598	9.8427e-07	6.32881e-06
BIOCARTA_G1_PATHWAY	28	6	0.214286	10.4058	6.64106e-05	0.000259215
BIOCARTA_ERK_PATHWAY	28	6	0.214286	10.4058	6.64106e-05	0.000259215
BIOCARTA_CELL2CELL_PATHWAY	14	3	0.214286	10.3524	0.00502029	0.0121712
BIOCARTA_DREAM_PATHWAY	14	3	0.214286	10.3524	0.00502029	0.0121712
PID_IL5_PATHWAY	14	3	0.214286	10.3524	0.00502029	0.0121712
REACTOME_PHOSPHORYLATION_OF_CD3_AND_TCR_ZETA_CHAINS	14	3	0.214286	10.3524	0.00502029	0.0121712
REACTOME_SOS_MEDIATED_SIGNALLING	14	3	0.214286	10.3524	0.00502029	0.0121712
KEGG_ACUTE_MYELOID_LEUKEMIA	57	12	0.210526	10.2808	1.87963e-08	1.77432e-07
KEGG_APOPTOSIS	87	18	0.206897	10.1634	7.08161e-12	1.38612e-10
PID_TCPTP_PATHWAY	43	9	0.209302	10.1539	1.21659e-06	7.66758e-06
SA_CASPASE_CASCADE	19	4	0.210526	10.1423	0.00124511	0.00355632
REACTOME_ENOS_ACTIVATION_AND_REGULATION	19	4	0.210526	10.1423	0.00124511	0.00355632
ST_TUMOR_NECROSIS_FACTOR_PATHWAY	29	6	0.206897	9.95252	8.19226e-05	0.00031154
REACTOME_NEUROTRANSMITTER_RELEASE_CYCLE	34	7	0.205882	9.9084	2.14163e-05	9.37667e-05
ST_DIFFERENTIATION_PATHWAY_IN_PC12_CELLS	44	9	0.204545	9.86156	1.49477e-06	9.21082e-06
REACTOME_CYTOCHROME_P450_ARRANGED_BY_SUBSTRATE_TYPE	49	10	0.204082	9.85045	3.97669e-07	2.72834e-06
PID_TAP63_PATHWAY	54	11	0.203704	9.84452	1.06126e-07	8.34637e-07
PID_AVB3_INTEGRIN_PATHWAY	75	15	0.2	9.68729	6.69025e-10	9.08645e-09
PID_IL2_1PATHWAY	55	11	0.2	9.61962	1.29603e-07	9.85725e-07
KEGG_ALZHEIMERS_DISEASE	160	31	0.19375	9.57697	1.25604e-18	9.28771e-17
KEGG_PRION_DISEASES	35	7	0.2	9.55246	2.61795e-05	0.000113502
BIOCARTA_STRESS_PATHWAY	25	5	0.2	9.52462	0.000387682	0.0012494
KEGG_CYTOKINE_CYTOKINE_RECEPTOR_INTERACTION	261	49	0.187739	9.51624	3.79808e-28	8.4254e-26
BIOCARTA_ATM_PATHWAY	20	4	0.2	9.50796	0.00152493	0.00429108
REACTOME_TRAF6_MEDIATED_NFKB_ACTIVATION	20	4	0.2	9.50796	0.00152493	0.00429108
KEGG_MELANOMA	71	14	0.197183	9.49798	3.03105e-09	3.63452e-08
BIOCARTA_IL17_PATHWAY	15	3	0.2	9.49133	0.00615639	0.0145803
BIOCARTA_IL3_PATHWAY	15	3	0.2	9.49133	0.00615639	0.0145803
SA_G1_AND_S_PHASES	15	3	0.2	9.49133	0.00615639	0.0145803
REACTOME_XENOBIOTICS	15	3	0.2	9.49133	0.00615639	0.0145803
KEGG_NOD_LIKE_RECEPTOR_SIGNALING_PATHWAY	61	12	0.196721	9.44143	4.21533e-08	3.64325e-07
KEGG_MTOR_SIGNALING_PATHWAY	51	10	0.196078	9.36932	5.90378e-07	3.96865e-06
KEGG_INSULIN_SIGNALING_PATHWAY	136	26	0.191176	9.3358	1.11078e-15	4.76917e-14
KEGG_PATHWAYS_IN_CANCER	324	59	0.182099	9.33461	5.51497e-33	3.67021e-30
KEGG_INTESTINAL_IMMUNE_NETWORK_FOR_IGA_PRODUCTION	46	9	0.195652	9.32794	2.21889e-06	1.29532e-05
SIG_BCR_SIGNALING_PATHWAY	46	9	0.195652	9.32794	2.21889e-06	1.29532e-05
PID_TNF_PATHWAY	46	9	0.195652	9.32794	2.21889e-06	1.29532e-05
REACTOME_IL_2_SIGNALING	41	8	0.195122	9.28059	8.37418e-06	4.09781e-05
PID_TRKR_PATHWAY	62	12	0.193548	9.25088	5.10598e-08	4.24753e-07
REACTOME_NEGATIVE_REGULATION_OF_FGFR_SIGNALING	36	7	0.194444	9.22478	3.17818e-05	0.000133866
REACTOME_PI3K_EVENTS_IN_ERBB4_SIGNALING	36	7	0.194444	9.22478	3.17818e-05	0.000133866
REACTOME_SIGNALING_BY_INSULIN_RECEPTOR	105	20	0.190476	9.19566	2.45007e-12	5.01699e-11
PID_NEPHRIN_NEPH1_PATHWAY	31	6	0.193548	9.15642	0.000121546	0.000450636
REACTOME_SIGNALING_BY_ILS	106	20	0.188679	9.08832	2.9485e-12	5.94614e-11
KEGG_NOTCH_SIGNALING_PATHWAY	47	9	0.191489	9.08211	2.68226e-06	1.51275e-05
PID_P73PATHWAY	79	15	0.189873	9.0804	1.43896e-09	1.78995e-08
KEGG_LINOLEIC_ACID_METABOLISM	26	5	0.192308	9.0683	0.000469891	0.0014904
ST_INTERLEUKIN_4_PATHWAY	26	5	0.192308	9.0683	0.000469891	0.0014904
KEGG_ALDOSTERONE_REGULATED_SODIUM_REABSORPTION	42	8	0.190476	9.00729	1.0113e-05	4.82451e-05
BIOCARTA_BIOPEPTIDES_PATHWAY	42	8	0.190476	9.00729	1.0113e-05	4.82451e-05
REACTOME_PI3K_EVENTS_IN_ERBB2_SIGNALING	42	8	0.190476	9.00729	1.0113e-05	4.82451e-05
BIOCARTA_HIVNEF_PATHWAY	58	11	0.189655	9.00532	2.29983e-07	1.66362e-06
PID_S1P_S1P1_PATHWAY	21	4	0.190476	8.94642	0.00184569	0.00506519
KEGG_AMYOTROPHIC_LATERAL_SCLEROSIS_ALS	53	10	0.188679	8.93282	8.60225e-07	5.61254e-06
BIOCARTA_ALK_PATHWAY	37	7	0.189189	8.91698	3.83331e-05	0.000159671
ST_PHOSPHOINOSITIDE_3_KINASE_PATHWAY	37	7	0.189189	8.91698	3.83331e-05	0.000159671
PID_RB_1PATHWAY	64	12	0.1875	8.89434	7.40766e-08	6.01195e-07
REACTOME_ABC_FAMILY_PROTEINS_MEDIATED_TRANSPORT	32	6	0.1875	8.80399	0.000146362	0.000526508
KEGG_NEUROTROPHIN_SIGNALING_PATHWAY	126	23	0.18254	8.77087	1.42123e-13	3.70912e-12
KEGG_ALPHA_LINOLENIC_ACID_METABOLISM	16	3	0.1875	8.75959	0.00743363	0.0172372
BIOCARTA_CDMAC_PATHWAY	16	3	0.1875	8.75959	0.00743363	0.0172372
BIOCARTA_ACH_PATHWAY	16	3	0.1875	8.75959	0.00743363	0.0172372
BIOCARTA_CDC42RAC_PATHWAY	16	3	0.1875	8.75959	0.00743363	0.0172372
BIOCARTA_SHH_PATHWAY	16	3	0.1875	8.75959	0.00743363	0.0172372
REACTOME_PD1_SIGNALING	16	3	0.1875	8.75959	0.00743363	0.0172372
REACTOME_RAP1_SIGNALLING	16	3	0.1875	8.75959	0.00743363	0.0172372
REACTOME_ACTIVATION_OF_BH3_ONLY_PROTEINS	16	3	0.1875	8.75959	0.00743363	0.0172372
KEGG_NON_SMALL_CELL_LUNG_CANCER	54	10	0.185185	8.72949	1.03161e-06	6.60132e-06
KEGG_GLIOMA	65	12	0.184615	8.72619	8.87459e-08	7.11571e-07
BIOCARTA_INTEGRIN_PATHWAY	38	7	0.184211	8.6291	4.5953e-05	0.000188195
PID_ERBB4_PATHWAY	38	7	0.184211	8.6291	4.5953e-05	0.000188195
PID_ARF6_TRAFFICKING_PATHWAY	49	9	0.183673	8.62741	3.86297e-06	2.07323e-05
PID_NCADHERIN_PATHWAY	33	6	0.181818	8.47776	0.000175022	0.000616282
PID_INTEGRIN_A4B1_PATHWAY	33	6	0.181818	8.47776	0.000175022	0.000616282
BIOCARTA_SPPA_PATHWAY	22	4	0.181818	8.44936	0.00221033	0.00595536
BIOCARTA_IL6_PATHWAY	22	4	0.181818	8.44936	0.00221033	0.00595536
REACTOME_GLUTATHIONE_CONJUGATION	22	4	0.181818	8.44936	0.00221033	0.00595536
REACTOME_CELL_SURFACE_INTERACTIONS_AT_THE_VASCULAR_WALL	84	15	0.178571	8.42073	3.51112e-09	4.13566e-08
KEGG_CHRONIC_MYELOID_LEUKEMIA	73	13	0.178082	8.36402	4.04198e-08	3.56283e-07
REACTOME_INTEGRIN_CELL_SURFACE_INTERACTIONS	79	14	0.177215	8.3286	1.29689e-08	1.3077e-07
REACTOME_REGULATION_OF_BETA_CELL_DEVELOPMENT	28	5	0.178571	8.27956	0.000672857	0.00204937
REACTOME_DIABETES_PATHWAYS	127	22	0.173228	8.21319	1.4653e-12	3.19723e-11
ST_WNT_BETA_CATENIN_PATHWAY	34	6	0.176471	8.17495	0.000207938	0.000717009
REACTOME_INTERFERON_GAMMA_SIGNALING	57	10	0.175439	8.17163	1.73689e-06	1.05082e-05
REACTOME_PPARA_ACTIVATES_GENE_EXPRESSION	104	18	0.173077	8.14827	1.62932e-10	2.52166e-09
REACTOME_BIOLOGICAL_OXIDATIONS	128	22	0.171875	8.1354	1.72756e-12	3.59278e-11
SA_PTEN_PATHWAY	17	3	0.176471	8.13418	0.00885588	0.0201156
PID_NFKAPPAB_ATYPICAL_PATHWAY	17	3	0.176471	8.13418	0.00885588	0.0201156
REACTOME_SIGNALING_BY_CONSTITUTIVELY_ACTIVE_EGFR	17	3	0.176471	8.13418	0.00885588	0.0201156
KEGG_NEUROACTIVE_LIGAND_RECEPTOR_INTERACTION	271	45	0.166052	8.1257	1.30855e-23	2.17709e-21
ST_B_CELL_ANTIGEN_RECEPTOR	40	7	0.175	8.10592	6.49267e-05	0.000254919
REACTOME_PLATELET_ACTIVATION_SIGNALING_AND_AGGREGATION	197	33	0.167513	8.03856	9.83192e-18	6.23156e-16
KEGG_ENDOMETRIAL_CANCER	52	9	0.173077	8.02501	6.45868e-06	3.25625e-05
PID_AR_TF_PATHWAY	52	9	0.173077	8.02501	6.45868e-06	3.25625e-05
REACTOME_CIRCADIAN_CLOCK	52	9	0.173077	8.02501	6.45868e-06	3.25625e-05
BIOCARTA_PTDINS_PATHWAY	23	4	0.173913	8.00487	0.00262172	0.00689627
BIOCARTA_RAS_PATHWAY	23	4	0.173913	8.00487	0.00262172	0.00689627
REACTOME_CIRCADIAN_REPRESSION_OF_EXPRESSION_BY_REV_ERBA	23	4	0.173913	8.00487	0.00262172	0.00689627
KEGG_FC_EPSILON_RI_SIGNALING_PATHWAY	76	13	0.171053	7.96509	6.66799e-08	5.44485e-07
BIOCARTA_TNFR1_PATHWAY	29	5	0.172414	7.93471	0.000795968	0.00235052
BIOCARTA_VEGF_PATHWAY	29	5	0.172414	7.93471	0.000795968	0.00235052
REACTOME_COMPLEMENT_CASCADE	29	5	0.172414	7.93471	0.000795968	0.00235052
KEGG_MAPK_SIGNALING_PATHWAY	264	43	0.162879	7.9099	2.8988e-22	3.50755e-20
PID_HIV_NEF_PATHWAY	35	6	0.171429	7.89313	0.000245543	0.000833719
REACTOME_CHEMOKINE_RECEPTORS_BIND_CHEMOKINES	53	9	0.169811	7.84255	7.60382e-06	3.76033e-05
PID_NOTCH_PATHWAY	59	10	0.169492	7.83786	2.41301e-06	1.37842e-05
PID_BCR_5PATHWAY	65	11	0.169231	7.83645	7.68166e-07	5.0366e-06
KEGG_T_CELL_RECEPTOR_SIGNALING_PATHWAY	108	18	0.166667	7.78515	3.10638e-10	4.49413e-09
KEGG_TOLL_LIKE_RECEPTOR_SIGNALING_PATHWAY	102	17	0.166667	7.77195	9.6837e-10	1.27614e-08
REACTOME_COSTIMULATION_BY_THE_CD28_FAMILY	60	10	0.166667	7.68103	2.82953e-06	1.55624e-05
PID_CERAMIDE_PATHWAY	48	8	0.166667	7.65551	2.82286e-05	0.000120504
REACTOME_BMAL1_CLOCK_NPAS2_ACTIVATES_CIRCADIAN_EXPRESSION	36	6	0.166667	7.63018	0.000288295	0.000952161
KEGG_ETHER_LIPID_METABOLISM	30	5	0.166667	7.61759	0.000935124	0.0027355
BIOCARTA_CXCR4_PATHWAY	24	4	0.166667	7.60505	0.00308271	0.00796715
REACTOME_YAP1_AND_WWTR1_TAZ_STIMULATED_GENE_EXPRESSION	24	4	0.166667	7.60505	0.00308271	0.00796715
REACTOME_DARPP_32_EVENTS	24	4	0.166667	7.60505	0.00308271	0.00796715
BIOCARTA_COMP_PATHWAY	18	3	0.166667	7.59256	0.0104264	0.0234023
BIOCARTA_NDKDYNAMIN_PATHWAY	18	3	0.166667	7.59256	0.0104264	0.0234023
KEGG_VEGF_SIGNALING_PATHWAY	73	12	0.164384	7.58031	3.35922e-07	2.36567e-06
KEGG_JAK_STAT_SIGNALING_PATHWAY	155	25	0.16129	7.57461	2.33527e-13	5.86461e-12
REACTOME_CLASS_A1_RHODOPSIN_LIKE_RECEPTORS	283	44	0.155477	7.49353	6.34388e-22	6.49516e-20
KEGG_ABC_TRANSPORTERS	43	7	0.162791	7.42728	0.000104972	0.000391368
PID_HNF3A_PATHWAY	43	7	0.162791	7.42728	0.000104972	0.000391368
PID_TELOMERASE_PATHWAY	68	11	0.161765	7.42377	1.22704e-06	7.66758e-06
REACTOME_EXTRACELLULAR_MATRIX_ORGANIZATION	87	14	0.16092	7.41448	4.66741e-08	3.9569e-07
ST_P38_MAPK_PATHWAY	37	6	0.162162	7.38094	0.000336675	0.00110646
ST_GA13_PATHWAY	37	6	0.162162	7.38094	0.000336675	0.00110646
REACTOME_SIGNALING_BY_SCF_KIT	75	12	0.16	7.33621	4.55494e-07	3.10904e-06
PID_AR_NONGENOMIC_PATHWAY	31	5	0.16129	7.32168	0.00109158	0.003138
REACTOME_GLUCONEOGENESIS	31	5	0.16129	7.32168	0.00109158	0.003138
REACTOME_GPVI_MEDIATED_ACTIVATION_CASCADE	31	5	0.16129	7.32168	0.00109158	0.003138
KEGG_AUTOIMMUNE_THYROID_DISEASE	50	8	0.16	7.28785	3.83883e-05	0.000159671
PID_HDAC_CLASSIII_PATHWAY	25	4	0.16	7.24023	0.00359604	0.00911683
PID_MYC_PATHWAY	25	4	0.16	7.24023	0.00359604	0.00911683
REACTOME_PTM_GAMMA_CARBOXYLATION_HYPUSINE_FORMATION_AND_ARYLSULFATASE_ACTIVATION	25	4	0.16	7.24023	0.00359604	0.00911683
PID_TXA2PATHWAY	57	9	0.157895	7.18588	1.40872e-05	6.46554e-05
KEGG_HYPERTROPHIC_CARDIOMYOPATHY_HCM	83	13	0.156627	7.16462	1.95904e-07	1.4406e-06
BIOCARTA_MTA3_PATHWAY	19	3	0.157895	7.11576	0.0121479	0.0267511
BIOCARTA_MAL_PATHWAY	19	3	0.157895	7.11576	0.0121479	0.0267511
BIOCARTA_TGFB_PATHWAY	19	3	0.157895	7.11576	0.0121479	0.0267511
PID_EPHA2_FWD_PATHWAY	19	3	0.157895	7.11576	0.0121479	0.0267511
REACTOME_BASE_EXCISION_REPAIR	19	3	0.157895	7.11576	0.0121479	0.0267511
REACTOME_SYNTHESIS_OF_BILE_ACIDS_AND_BILE_SALTS	19	3	0.157895	7.11576	0.0121479	0.0267511
REACTOME_NEPHRIN_INTERACTIONS	19	3	0.157895	7.11576	0.0121479	0.0267511
KEGG_DRUG_METABOLISM_CYTOCHROME_P450	64	10	0.15625	7.1089	5.18357e-06	2.69505e-05
KEGG_CALCIUM_SIGNALING_PATHWAY	177	27	0.152542	7.10878	1.03238e-13	2.74819e-12
REACTOME_DOWNSTREAM_SIGNALING_OF_ACTIVATED_FGFR	97	15	0.154639	7.08045	2.69635e-08	2.47507e-07
BIOCARTA_PDGF_PATHWAY	32	5	0.15625	7.05098	0.00126662	0.0036023
PID_NETRIN_PATHWAY	32	5	0.15625	7.05098	0.00126662	0.0036023
REACTOME_CELL_DEATH_SIGNALLING_VIA_NRAGE_NRIF_AND_NADE	58	9	0.155172	7.03932	1.6298e-05	7.35342e-05
REACTOME_METABOLISM_OF_LIPIDS_AND_LIPOPROTEINS	467	66	0.141328	6.95732	5.53664e-30	1.84232e-27
PID_CASPASE_PATHWAY	52	8	0.153846	6.95688	5.14328e-05	0.000208076
PID_KIT_PATHWAY	52	8	0.153846	6.95688	5.14328e-05	0.000208076
PID_RET_PATHWAY	39	6	0.153846	6.93425	0.000452352	0.00144731
REACTOME_IL1_SIGNALING	39	6	0.153846	6.93425	0.000452352	0.00144731
BIOCARTA_RACCYCD_PATHWAY	26	4	0.153846	6.91179	0.00416444	0.0103412
BIOCARTA_WNT_PATHWAY	26	4	0.153846	6.91179	0.00416444	0.0103412
BIOCARTA_KERATINOCYTE_PATHWAY	46	7	0.152174	6.85652	0.00016311	0.000578933
PID_SYNDECAN_1_PATHWAY	46	7	0.152174	6.85652	0.00016311	0.000578933
PID_HES_HEY_PATHWAY	46	7	0.152174	6.85652	0.00016311	0.000578933
PID_TCR_PATHWAY	66	10	0.151515	6.85507	6.89455e-06	3.46288e-05
PID_CD8_TCR_PATHWAY	53	8	0.150943	6.8022	5.92246e-05	0.000233911
REACTOME_PHOSPHOLIPASE_C_MEDIATED_CASCADE	53	8	0.150943	6.8022	5.92246e-05	0.000233911
KEGG_BUTANOATE_METABOLISM	33	5	0.151515	6.7993	0.00146155	0.0041302
PID_SYNDECAN_2_PATHWAY	33	5	0.151515	6.7993	0.00146155	0.0041302
BIOCARTA_P38MAPK_PATHWAY	40	6	0.15	6.73015	0.000520721	0.00161919
ST_JNK_MAPK_PATHWAY	40	6	0.15	6.73015	0.000520721	0.00161919
PID_FOXM1_PATHWAY	40	6	0.15	6.73015	0.000520721	0.00161919
ST_WNT_CA2_CYCLIC_GMP_PATHWAY	20	3	0.15	6.69753	0.0140225	0.0304967
PID_DELTA_NP63_PATHWAY	47	7	0.148936	6.68483	0.000187444	0.000654824
KEGG_VIRAL_MYOCARDITIS	68	10	0.147059	6.61809	9.07328e-06	4.39147e-05
REACTOME_SIGNALING_BY_NOTCH1	68	10	0.147059	6.61809	9.07328e-06	4.39147e-05
BIOCARTA_EDG1_PATHWAY	27	4	0.148148	6.61105	0.0047905	0.0117425
REACTOME_PIP3_ACTIVATES_AKT_SIGNALING	27	4	0.148148	6.61105	0.0047905	0.0117425
PID_SMAD2_3NUCLEAR_PATHWAY	82	12	0.146341	6.60172	1.22649e-06	7.66758e-06
NABA_ECM_REGULATORS	233	33	0.141631	6.57954	1.67859e-15	6.9819e-14
PID_EPO_PATHWAY	34	5	0.147059	6.56459	0.00167769	0.00468136
PID_MAPK_TRK_PATHWAY	34	5	0.147059	6.56459	0.00167769	0.00468136
REACTOME_FATTY_ACID_TRIACYLGLYCEROL_AND_KETONE_BODY_METABOLISM	168	24	0.142857	6.54622	1.04056e-11	1.92358e-10
KEGG_STEROID_HORMONE_BIOSYNTHESIS	48	7	0.145833	6.5215	0.000214627	0.000733771
KEGG_GLUTATHIONE_METABOLISM	48	7	0.145833	6.5215	0.000214627	0.000733771
KEGG_METABOLISM_OF_XENOBIOTICS_BY_CYTOCHROME_P450	62	9	0.145161	6.50734	2.8338e-05	0.000120504
KEGG_COLORECTAL_CANCER	62	9	0.145161	6.50734	2.8338e-05	0.000120504
REACTOME_HEMOSTASIS	446	60	0.134529	6.493	3.90686e-26	7.42862e-24
KEGG_ECM_RECEPTOR_INTERACTION	84	12	0.142857	6.41774	1.59639e-06	9.74675e-06
REACTOME_CYTOKINE_SIGNALING_IN_IMMUNE_SYSTEM	261	36	0.137931	6.41086	1.99966e-16	1.02367e-14
PID_ERBB1_RECEPTOR_PROXIMAL_PATHWAY	35	5	0.142857	6.3455	0.00191638	0.00522686
PID_PI3KCI_AKT_PATHWAY	35	5	0.142857	6.3455	0.00191638	0.00522686
REACTOME_SIGNALING_BY_FGFR_IN_DISEASE	121	17	0.140496	6.3455	1.41909e-08	1.40956e-07
BIOCARTA_NOS1_PATHWAY	21	3	0.142857	6.32522	0.016052	0.0346838
PID_P38_MK2_PATHWAY	21	3	0.142857	6.32522	0.016052	0.0346838
REACTOME_ACYL_CHAIN_REMODELLING_OF_PE	21	3	0.142857	6.32522	0.016052	0.0346838
REACTOME_SIGNALING_BY_FGFR	108	15	0.138889	6.24037	1.17618e-07	9.04913e-07
REACTOME_INTEGRATION_OF_ENERGY_METABOLISM	116	16	0.137931	6.20032	4.92861e-08	4.15189e-07
REACTOME_GPCR_LIGAND_BINDING	382	50	0.13089	6.17684	2.25484e-21	2.14371e-19
KEGG_ERBB_SIGNALING_PATHWAY	87	12	0.137931	6.16017	2.33631e-06	1.3484e-05
ST_FAS_SIGNALING_PATHWAY	65	9	0.138462	6.15789	4.16997e-05	0.000172904
PID_CXCR4_PATHWAY	102	14	0.137255	6.14491	3.60217e-07	2.5102e-06
ST_ADRENERGIC	36	5	0.138889	6.14056	0.00217898	0.00590676
SIG_PIP3_SIGNALING_IN_B_LYMPHOCYTES	36	5	0.138889	6.14056	0.00217898	0.00590676
REACTOME_G_ALPHA_S_SIGNALLING_EVENTS	117	16	0.136752	6.13864	5.57556e-08	4.60936e-07
NABA_SECRETED_FACTORS	328	43	0.131098	6.11372	1.51023e-18	1.01363e-16
KEGG_ADHERENS_JUNCTION	73	10	0.136986	6.09145	1.72798e-05	7.77009e-05
PID_LYSOPHOSPHOLIPID_PATHWAY	66	9	0.136364	6.04959	4.71952e-05	0.0001921
PID_HDAC_CLASSI_PATHWAY	66	9	0.136364	6.04959	4.71952e-05	0.0001921
BIOCARTA_TCR_PATHWAY	44	6	0.136364	6.02068	0.000877894	0.00257942
PID_ERBB2_ERBB3_PATHWAY	44	6	0.136364	6.02068	0.000877894	0.00257942
PID_E2F_PATHWAY	74	10	0.135135	5.996	1.95251e-05	8.63386e-05
KEGG_BETA_ALANINE_METABOLISM	22	3	0.136364	5.9921	0.0182375	0.0387766
BIOCARTA_CHEMICAL_PATHWAY	22	3	0.136364	5.9921	0.0182375	0.0387766
BIOCARTA_CERAMIDE_PATHWAY	22	3	0.136364	5.9921	0.0182375	0.0387766
REACTOME_ACYL_CHAIN_REMODELLING_OF_PC	22	3	0.136364	5.9921	0.0182375	0.0387766
REACTOME_TAK1_ACTIVATES_NFKB_BY_PHOSPHORYLATION_AND_ACTIVATION_OF_IKKS_COMPLEX	22	3	0.136364	5.9921	0.0182375	0.0387766
BIOCARTA_TOLL_PATHWAY	37	5	0.135135	5.94842	0.00246684	0.0065633
REACTOME_GOLGI_ASSOCIATED_VESICLE_BIOGENESIS	52	7	0.134615	5.94076	0.000356863	0.00115288
KEGG_FOCAL_ADHESION	199	26	0.130653	5.91788	1.13808e-11	2.047e-10
PID_CMYB_PATHWAY	84	11	0.130952	5.79102	1.02535e-05	4.87022e-05
PID_FCER1_PATHWAY	61	8	0.131148	5.7734	0.000164312	0.000581647
BIOCARTA_FCER1_PATHWAY	38	5	0.131579	5.76792	0.00278133	0.0072873
PID_FAS_PATHWAY	38	5	0.131579	5.76792	0.00278133	0.0072873
REACTOME_SIGNALING_BY_NOTCH	100	13	0.13	5.7608	1.76685e-06	1.06411e-05
REACTOME_REGULATION_OF_HYPOXIA_INDUCIBLE_FACTOR_HIF_BY_OXYGEN	23	3	0.130435	5.69259	0.0205799	0.0435483
REACTOME_LYSOSOME_VESICLE_BIOGENESIS	23	3	0.130435	5.69259	0.0205799	0.0435483
KEGG_PANCREATIC_CANCER	70	9	0.128571	5.65248	7.56969e-05	0.000293739
REACTOME_SIGNALING_BY_PDGF	118	15	0.127119	5.63259	3.83575e-07	2.65906e-06
BIOCARTA_EGF_PATHWAY	31	4	0.129032	5.63147	0.00792083	0.0182398
REACTOME_SIGNAL_AMPLIFICATION	31	4	0.129032	5.63147	0.00792083	0.0182398
PID_MYC_REPRESS_PATHWAY	63	8	0.126984	5.56212	0.000206586	0.000714197
REACTOME_P75_NTR_RECEPTOR_MEDIATED_SIGNALLING	79	10	0.126582	5.5594	3.49005e-05	0.000146538
NABA_MATRISOME	979	106	0.108274	5.48304	1.56966e-37	2.08922e-34
REACTOME_NCAM_SIGNALING_FOR_NEURITE_OUT_GROWTH	64	8	0.125	5.46289	0.000230848	0.000785827
NABA_MATRISOME_ASSOCIATED	711	80	0.112518	5.46246	2.73291e-29	7.27502e-27
KEGG_TRYPTOPHAN_METABOLISM	40	5	0.125	5.43745	0.0034957	0.00891336
KEGG_PYRUVATE_METABOLISM	40	5	0.125	5.43745	0.0034957	0.00891336
KEGG_PROPANOATE_METABOLISM	32	4	0.125	5.42903	0.00887143	0.0201156
ST_ERK1_ERK2_MAPK_PATHWAY	32	4	0.125	5.42903	0.00887143	0.0201156
BIOCARTA_ECM_PATHWAY	24	3	0.125	5.42065	0.0230795	0.0479233
BIOCARTA_TPO_PATHWAY	24	3	0.125	5.42065	0.0230795	0.0479233
PID_TOLL_ENDOGENOUS_PATHWAY	24	3	0.125	5.42065	0.0230795	0.0479233
REACTOME_BASIGIN_INTERACTIONS	24	3	0.125	5.42065	0.0230795	0.0479233
REACTOME_ACTIVATION_OF_GENES_BY_ATF4	24	3	0.125	5.42065	0.0230795	0.0479233
REACTOME_REGULATION_OF_IFNA_SIGNALING	24	3	0.125	5.42065	0.0230795	0.0479233
REACTOME_REGULATION_OF_INSULIN_SECRETION	89	11	0.123596	5.41818	1.7954e-05	8.04607e-05
REACTOME_PEPTIDE_LIGAND_BINDING_RECEPTORS	174	21	0.12069	5.35683	4.74844e-09	5.35608e-08
KEGG_NATURAL_KILLER_CELL_MEDIATED_CYTOTOXICITY	132	16	0.121212	5.3408	3.05737e-07	2.16455e-06
KEGG_BASE_EXCISION_REPAIR	33	4	0.121212	5.24187	0.00989348	0.0222813
REACTOME_DOWNSTREAM_TCR_SIGNALING	33	4	0.121212	5.24187	0.00989348	0.0222813
REACTOME_COLLAGEN_FORMATION	58	7	0.12069	5.24033	0.000702261	0.00212918
KEGG_B_CELL_RECEPTOR_SIGNALING_PATHWAY	75	9	0.12	5.22238	0.000130462	0.000473148
REACTOME_METABOLISM_OF_VITAMINS_AND_COFACTORS	50	6	0.12	5.19822	0.00173518	0.00482155
REACTOME_TCR_SIGNALING	50	6	0.12	5.19822	0.00173518	0.00482155
KEGG_ANTIGEN_PROCESSING_AND_PRESENTATION	84	10	0.119048	5.18324	5.9625e-05	0.000234795
REACTOME_PLATELET_HOMEOSTASIS	76	9	0.118421	5.14423	0.000144659	0.000521792
KEGG_FATTY_ACID_METABOLISM	42	5	0.119048	5.14342	0.00433304	0.0107198
KEGG_TYROSINE_METABOLISM	42	5	0.119048	5.14342	0.00433304	0.0107198
PID_P53_REGULATION_PATHWAY	59	7	0.118644	5.13937	0.000779374	0.00235052
REACTOME_TRANS_GOLGI_NETWORK_VESICLE_BUDDING	59	7	0.118644	5.13937	0.000779374	0.00235052
KEGG_P53_SIGNALING_PATHWAY	68	8	0.117647	5.09816	0.000352389	0.00115288
PID_PDGFRB_PATHWAY	129	15	0.116279	5.08568	1.22295e-06	7.66758e-06
PID_HDAC_CLASSII_PATHWAY	34	4	0.117647	5.067	0.0109889	0.0246233
REACTOME_GASTRIN_CREB_SIGNALLING_PATHWAY_VIA_PKC_AND_MAPK	193	22	0.11399	5.02651	5.985e-09	6.52954e-08
PID_THROMBIN_PAR1_PATHWAY	43	5	0.116279	5.00747	0.00480122	0.0117471
KEGG_GLYCOLYSIS_GLUCONEOGENESIS	61	7	0.114754	4.94936	0.000953599	0.00277733
REACTOME_PHASE_II_CONJUGATION	61	7	0.114754	4.94936	0.000953599	0.00277733
KEGG_RENAL_CELL_CARCINOMA	70	8	0.114286	4.93394	0.000430277	0.00138333
PID_MYC_ACTIV_PATHWAY	79	9	0.113924	4.92373	0.000195202	0.00068014
KEGG_GAP_JUNCTION	88	10	0.113636	4.91715	8.89203e-05	0.00033623
ST_G_ALPHA_I_PATHWAY	35	4	0.114286	4.90389	0.0121596	0.0267511
PID_ARF6_PATHWAY	35	4	0.114286	4.90389	0.0121596	0.0267511
KEGG_VALINE_LEUCINE_AND_ISOLEUCINE_DEGRADATION	44	5	0.113636	4.8797	0.00530422	0.0127897
NABA_COLLAGENS	44	5	0.113636	4.8797	0.00530422	0.0127897
KEGG_RIG_I_LIKE_RECEPTOR_SIGNALING_PATHWAY	71	8	0.112676	4.8551	0.000474155	0.0014904
REACTOME_RIG_I_MDA5_MEDIATED_INDUCTION_OF_IFN_ALPHA_BETA_PATHWAYS	71	8	0.112676	4.8551	0.000474155	0.0014904
REACTOME_AMYLOIDS	71	8	0.112676	4.8551	0.000474155	0.0014904
PID_MET_PATHWAY	80	9	0.1125	4.8539	0.000215004	0.000733771
PID_BETA_CATENIN_NUC_PATHWAY	80	9	0.1125	4.8539	0.000215004	0.000733771
KEGG_ENDOCYTOSIS	181	20	0.110497	4.83741	4.97619e-08	4.16561e-07
REACTOME_G_ALPHA_Q_SIGNALLING_EVENTS	172	19	0.110465	4.82829	1.07947e-07	8.40216e-07
REACTOME_DEVELOPMENTAL_BIOLOGY	383	41	0.10705	4.82449	1.26023e-14	4.30093e-13
PID_P53_DOWNSTREAM_PATHWAY	136	15	0.110294	4.79007	2.39624e-06	1.37474e-05
REACTOME_TRANSMISSION_ACROSS_CHEMICAL_SYNAPSES	183	20	0.10929	4.77746	5.984e-08	4.91648e-07
KEGG_RETINOL_METABOLISM	54	6	0.111111	4.76439	0.00258651	0.00684423
KEGG_CYTOSOLIC_DNA_SENSING_PATHWAY	54	6	0.111111	4.76439	0.00258651	0.00684423
REACTOME_SIGNALLING_BY_NGF	212	23	0.108491	4.76005	7.03263e-09	7.31284e-08
REACTOME_TRANSCRIPTIONAL_ACTIVITY_OF_SMAD2_SMAD3_SMAD4_HETEROTRIMER	36	4	0.111111	4.75006	0.0134071	0.0292061
REACTOME_DOWNSTREAM_SIGNAL_TRANSDUCTION	91	10	0.10989	4.73391	0.00011819	0.000439416
ST_INTEGRIN_SIGNALING_PATHWAY	82	9	0.109756	4.72023	0.000259635	0.000862074
PID_TGFBR_PATHWAY	55	6	0.109091	4.66726	0.00284121	0.00742957
KEGG_TGF_BETA_SIGNALING_PATHWAY	83	9	0.108434	4.65666	0.000284676	0.000942545
REACTOME_PI_METABOLISM	46	5	0.108696	4.64149	0.00641992	0.0151775
KEGG_FC_GAMMA_R_MEDIATED_PHAGOCYTOSIS	93	10	0.107527	4.61875	0.00014192	0.000513302
BIOCARTA_MET_PATHWAY	37	4	0.108108	4.60534	0.0147332	0.0319901
REACTOME_NGF_SIGNALLING_VIA_TRKA_FROM_THE_PLASMA_MEMBRANE	134	14	0.104478	4.49925	9.75078e-06	4.70228e-05
REACTOME_SIGNALING_BY_EGFR_IN_CANCER	105	11	0.104762	4.49271	8.4593e-05	0.000320779
KEGG_SNARE_INTERACTIONS_IN_VESICULAR_TRANSPORT	38	4	0.105263	4.47008	0.0161394	0.034816
KEGG_LONG_TERM_DEPRESSION	67	7	0.104478	4.45248	0.00166524	0.00466617
KEGG_CHEMOKINE_SIGNALING_PATHWAY	185	19	0.102703	4.44703	3.40852e-07	2.38776e-06
KEGG_GLYCEROLIPID_METABOLISM	48	5	0.104167	4.42482	0.00769058	0.0177711
REACTOME_SIGNALING_BY_ERBB2	97	10	0.103093	4.40661	0.000201565	0.000700476
REACTOME_SIGNALING_BY_GPCR	639	61	0.0954617	4.37498	8.56505e-19	6.70593e-17
REACTOME_NCAM1_INTERACTIONS	39	4	0.102564	4.34221	0.0176268	0.0378409
NABA_ECM_GLYCOPROTEINS	189	19	0.100529	4.34155	4.75132e-07	3.22654e-06
PID_FOXO_PATHWAY	49	5	0.102041	4.32377	0.0083872	0.0192804
PID_MTOR_4PATHWAY	69	7	0.101449	4.30833	0.00197691	0.00538091
KEGG_DILATED_CARDIOMYOPATHY	90	9	0.1	4.25239	0.000521888	0.00161919
PID_AR_PATHWAY	60	6	0.1	4.2337	0.00440526	0.0108381
REACTOME_SIGNALING_BY_TGF_BETA_RECEPTOR_COMPLEX	60	6	0.1	4.2337	0.00440526	0.0108381
PID_EPHB_FWD_PATHWAY	40	4	0.1	4.2214	0.019197	0.0407515
NABA_CORE_MATRISOME	268	26	0.0970149	4.21614	7.88828e-09	8.13899e-08
REACTOME_G_ALPHA_I_SIGNALLING_EVENTS	185	18	0.0972973	4.17943	1.52817e-06	9.37327e-06
REACTOME_GPCR_DOWNSTREAM_SIGNALING	533	49	0.0919325	4.11198	1.23854e-14	4.30093e-13
KEGG_WNT_SIGNALING_PATHWAY	148	14	0.0945946	4.02653	3.02235e-05	0.000128113
PID_ENDOTHELIN_PATHWAY	63	6	0.0952381	4.01035	0.0056051	0.0134908
PID_BMP_PATHWAY	42	4	0.0952381	3.99891	0.0225896	0.0474239
REACTOME_PRE_NOTCH_EXPRESSION_AND_PROCESSING	42	4	0.0952381	3.99891	0.0225896	0.0474239
KEGG_GLYCEROPHOSPHOLIPID_METABOLISM	74	7	0.0945946	3.98605	0.00295417	0.00768301
KEGG_ARGININE_AND_PROLINE_METABOLISM	53	5	0.0943396	3.96283	0.0116105	0.0259724
PID_ERA_GENOMIC_PATHWAY	64	6	0.09375	3.94105	0.00605347	0.0144394
REACTOME_SEMAPHORIN_INTERACTIONS	64	6	0.09375	3.94105	0.00605347	0.0144394
REACTOME_GLUCOSE_METABOLISM	64	6	0.09375	3.94105	0.00605347	0.0144394
KEGG_HEDGEHOG_SIGNALING_PATHWAY	54	5	0.0925926	3.88184	0.0125313	0.0274329
KEGG_PATHOGENIC_ESCHERICHIA_COLI_INFECTION	54	5	0.0925926	3.88184	0.0125313	0.0274329
PID_NFAT_3PATHWAY	54	5	0.0925926	3.88184	0.0125313	0.0274329
PID_CD8_TCR_DOWNSTREAM_PATHWAY	65	6	0.0923077	3.87413	0.0065274	0.0154042
KEGG_REGULATION_OF_ACTIN_CYTOSKELETON	211	19	0.0900474	3.84006	2.52196e-06	1.4345e-05
REACTOME_OPIOID_SIGNALLING	77	7	0.0909091	3.81482	0.00369615	0.00935282
REACTOME_TOLL_RECEPTOR_CASCADES	113	10	0.0884956	3.71908	0.000690253	0.00209755
REACTOME_NFKB_AND_MAP_KINASES_ACTIVATION_MEDIATED_BY_TLR4_SIGNALING_REPERTOIRE	69	6	0.0869565	3.62708	0.00869472	0.0199185
REACTOME_INNATE_IMMUNE_SYSTEM	248	21	0.0846774	3.59726	2.03671e-06	1.20483e-05
KEGG_SYSTEMIC_LUPUS_ERYTHEMATOSUS	117	10	0.0854701	3.57888	0.000905156	0.00265366
KEGG_LONG_TERM_POTENTIATION	70	6	0.0857143	3.5704	0.0093084	0.0210348
REACTOME_GLYCEROPHOSPHOLIPID_BIOSYNTHESIS	82	7	0.0853659	3.5594	0.00523701	0.0126736
PID_FAK_PATHWAY	59	5	0.0847458	3.52145	0.0178786	0.0383195
REACTOME_IMMUNE_SYSTEM	872	68	0.0779817	3.51797	3.03406e-16	1.418e-14
KEGG_PROGESTERONE_MEDIATED_OOCYTE_MATURATION	84	7	0.0833333	3.46666	0.00597226	0.0143227
REACTOME_NEURONAL_SYSTEM	274	22	0.080292	3.39733	2.81171e-06	1.55285e-05
KEGG_GNRH_SIGNALING_PATHWAY	98	8	0.0816327	3.3939	0.00383786	0.00969296
KEGG_CELL_CYCLE	123	10	0.0813008	3.38797	0.00132791	0.00376854
KEGG_OOCYTE_MEIOSIS	111	9	0.0810811	3.37339	0.00232369	0.00624814
KEGG_ARRHYTHMOGENIC_RIGHT_VENTRICULAR_CARDIOMYOPATHY_ARVC	74	6	0.0810811	3.3598	0.0120737	0.0267511
KEGG_VASCULAR_SMOOTH_MUSCLE_CONTRACTION	112	9	0.0803571	3.34047	0.00247048	0.0065633
BIOCARTA_MAPK_PATHWAY	87	7	0.0804598	3.33616	0.00721608	0.0169693
REACTOME_IMMUNOREGULATORY_INTERACTIONS_BETWEEN_A_LYMPHOID_AND_A_NON_LYMPHOID_CELL	62	5	0.0806452	3.33562	0.0217155	0.0457332
REACTOME_INTERFERON_ALPHA_BETA_SIGNALING	62	5	0.0806452	3.33562	0.0217155	0.0457332
REACTOME_AXON_GUIDANCE	240	19	0.0791667	3.3312	1.62217e-05	7.34393e-05
KEGG_MELANOGENESIS	100	8	0.08	3.31979	0.00434113	0.0107199
REACTOME_INTERFERON_SIGNALING	151	12	0.0794702	3.31353	0.000557637	0.00172608
REACTOME_MHC_CLASS_II_ANTIGEN_PRESENTATION	88	7	0.0795455	3.29481	0.00767044	0.0177554
KEGG_LEUKOCYTE_TRANSENDOTHELIAL_MIGRATION	115	9	0.0782609	3.24544	0.00295545	0.00768301
REACTOME_APOPTOSIS	142	11	0.0774648	3.21798	0.00115487	0.00331277
KEGG_AXON_GUIDANCE	129	10	0.0775194	3.21618	0.00189904	0.00520088
REACTOME_ACTIVATED_TLR4_SIGNALLING	90	7	0.0777778	3.2151	0.00864206	0.019832
PID_ERBB1_DOWNSTREAM_PATHWAY	105	8	0.0761905	3.14788	0.00582156	0.0139865
KEGG_HUNTINGTONS_DISEASE	173	13	0.0751445	3.12126	0.00056869	0.00175621
REACTOME_GENERIC_TRANSCRIPTION_PATHWAY	335	24	0.0716418	3.00599	7.21355e-06	3.58255e-05
KEGG_CELL_ADHESION_MOLECULES_CAMS	130	9	0.0692308	2.84103	0.00660931	0.0155699
REACTOME_METABOLISM_OF_AMINO_ACIDS_AND_DERIVATIVES	193	13	0.0673575	2.77172	0.00155757	0.00437369
REACTOME_SIGNALING_BY_THE_B_CELL_RECEPTOR_BCR	121	8	0.0661157	2.69996	0.0131932	0.0287871
REACTOME_MEMBRANE_TRAFFICKING	126	8	0.0634921	2.58504	0.0164981	0.0355323
REACTOME_PHOSPHOLIPID_METABOLISM	191	12	0.0628272	2.56801	0.00409949	0.010218
REACTOME_ADAPTIVE_IMMUNE_SYSTEM	510	31	0.0607843	2.5347	1.0282e-05	4.87022e-05
REACTOME_METABOLISM_OF_CARBOHYDRATES	232	14	0.0603448	2.4646	0.00291355	0.00760379
REACTOME_NEUROTRANSMITTER_RECEPTOR_BINDING_AND_DOWNSTREAM_TRANSMISSION_IN_THE_POSTSYNAPTIC_CELL	134	8	0.0597015	2.4199	0.0229672	0.0479233
REACTOME_TRANSMEMBRANE_TRANSPORT_OF_SMALL_MOLECULES	403	19	0.0471464	1.90155	0.00885198	0.0201156
