# Supplementary material for: The Pathway Coexpression Network: Revealing pathway relationships
Source: PLoS Comput Biol. 2018 Mar 19;14(3):e1006042. doi: 10.1371/journal.pcbi.1006042 (PMC5875878; doi:10.1371/journal.pcbi.1006042)
Supplement: S8 Table — (XLSX) [file pcbi.1006042.s011.xlsx]

## Sheet: Table S8
NAME	SIZE	ES	NES	NOM.p.val	FDR.q.val	FWER.p.val	RANK.AT.MAX	LEADING.EDGE
KEGG_NOTCH_SIGNALING_PATHWAY	41	-0.675083	-2.05416	0	0.0180441	0.013	3884	tags=59%, list=19%, signal=72%
PID_RB_1PATHWAY	65	-0.524188	-1.97111	0	0.0260891	0.052	3639	tags=38%, list=18%, signal=47%
PID_ANGIOPOIETIN_RECEPTOR_PATHWAY	49	-0.536883	-1.98308	0	0.0323596	0.046	5513	tags=49%, list=27%, signal=67%
PID_PS1_PATHWAY	42	-0.599955	-1.86774	0	0.0347459	0.184	4259	tags=57%, list=21%, signal=72%
PID_HIF2PATHWAY	30	-0.636896	-1.84095	0.00770713	0.0349849	0.23	2215	tags=47%, list=11%, signal=52%
PID_SMAD2_3NUCLEAR_PATHWAY	72	-0.472675	-1.84739	0	0.0351165	0.217	2290	tags=29%, list=11%, signal=33%
REACTOME_A_TETRASACCHARIDE_LINKER_SEQUENCE_IS_REQUIRED_FOR_GAG_SYNTHESIS	19	-0.761632	-1.84963	0.00391389	0.0366398	0.214	2594	tags=58%, list=13%, signal=66%
REACTOME_YAP1_AND_WWTR1_TAZ_STIMULATED_GENE_EXPRESSION	21	-0.748433	-1.83025	0.00203666	0.0369677	0.249	2311	tags=52%, list=11%, signal=59%
KEGG_DORSO_VENTRAL_AXIS_FORMATION	23	-0.548106	-1.85347	0	0.0380459	0.205	3328	tags=35%, list=16%, signal=41%
KEGG_FOCAL_ADHESION	188	-0.489217	-1.8679	0.00189036	0.0386066	0.184	3812	tags=40%, list=18%, signal=49%
KEGG_ARRHYTHMOGENIC_RIGHT_VENTRICULAR_CARDIOMYOPATHY_ARVC	73	-0.486981	-1.9229	0	0.039297	0.1	3240	tags=36%, list=16%, signal=42%
REACTOME_CELL_SURFACE_INTERACTIONS_AT_THE_VASCULAR_WALL	84	-0.53742	-1.80118	0	0.0409572	0.335	2378	tags=30%, list=12%, signal=34%
PID_RXR_VDR_PATHWAY	25	-0.52432	-1.8176	0.00595238	0.0420578	0.293	3599	tags=32%, list=17%, signal=39%
REACTOME_BMAL1_CLOCK_NPAS2_ACTIVATES_CIRCADIAN_EXPRESSION	30	-0.586033	-1.803	0.0020202	0.0422497	0.331	2474	tags=37%, list=12%, signal=42%
REACTOME_PRE_NOTCH_TRANSCRIPTION_AND_TRANSLATION	23	-0.69253	-1.90066	0.00389864	0.0432989	0.134	3897	tags=57%, list=19%, signal=70%
PID_AR_PATHWAY	50	-0.607721	-1.86794	0	0.0434324	0.184	1882	tags=32%, list=9%, signal=35%
KEGG_HYPERTROPHIC_CARDIOMYOPATHY_HCM	82	-0.393808	-1.80451	0	0.0435395	0.326	3375	tags=28%, list=16%, signal=33%
PID_NOTCH_PATHWAY	55	-0.464748	-1.80714	0	0.0447206	0.323	3790	tags=36%, list=18%, signal=44%
BIOCARTA_TNFR2_PATHWAY	18	-0.650432	-1.78973	0.00390625	0.0463215	0.362	2460	tags=39%, list=12%, signal=44%
REACTOME_MYOGENESIS	25	-0.524163	-1.86852	0	0.049495	0.184	3331	tags=40%, list=16%, signal=48%
KEGG_ADIPOCYTOKINE_SIGNALING_PATHWAY	66	-0.442032	-1.77292	0.00188679	0.0497191	0.405	2606	tags=29%, list=13%, signal=33%
KEGG_CELL_ADHESION_MOLECULES_CAMS	125	-0.47097	-1.77936	0.00194175	0.0497743	0.388	3323	tags=30%, list=16%, signal=36%
REACTOME_RORA_ACTIVATES_CIRCADIAN_EXPRESSION	21	-0.667243	-1.76682	0.00399202	0.0500945	0.427	2215	tags=48%, list=11%, signal=53%
REACTOME_SEMA4D_INDUCED_CELL_MIGRATION_AND_GROWTH_CONE_COLLAPSE	23	-0.592172	-1.76906	0.00967118	0.0502535	0.417	5040	tags=57%, list=24%, signal=75%
REACTOME_PRE_NOTCH_EXPRESSION_AND_PROCESSING	37	-0.531682	-1.77406	0.0172084	0.0508897	0.403	3259	tags=35%, list=16%, signal=42%
PID_INTEGRIN_CS_PATHWAY	25	-0.638564	-1.87517	0	0.0530619	0.172	1037	tags=32%, list=5%, signal=34%
PID_CASPASE_PATHWAY	50	-0.454556	-1.75671	0.00575816	0.0552852	0.463	4504	tags=38%, list=22%, signal=49%
REACTOME_BASIGIN_INTERACTIONS	24	-0.647724	-1.74793	0.0118812	0.0578121	0.495	4416	tags=58%, list=21%, signal=74%
REACTOME_CHONDROITIN_SULFATE_DERMATAN_SULFATE_METABOLISM	34	-0.627372	-1.74907	0.013308	0.0589736	0.489	3168	tags=50%, list=15%, signal=59%
KEGG_APOPTOSIS	82	-0.46778	-1.70489	0.00582524	0.0596385	0.628	2509	tags=28%, list=12%, signal=32%
ST_INTEGRIN_SIGNALING_PATHWAY	79	-0.471522	-1.71998	0.00203252	0.0598043	0.587	4637	tags=41%, list=23%, signal=52%
REACTOME_SEMA4D_IN_SEMAPHORIN_SIGNALING	27	-0.565514	-1.7398	0.0135397	0.0598142	0.522	4502	tags=52%, list=22%, signal=66%
KEGG_DILATED_CARDIOMYOPATHY	89	-0.396154	-1.71379	0.0019305	0.059838	0.604	3375	tags=29%, list=16%, signal=35%
REACTOME_CIRCADIAN_REPRESSION_OF_EXPRESSION_BY_REV_ERBA	20	-0.613512	-1.73081	0.016129	0.0598681	0.555	2215	tags=40%, list=11%, signal=45%
REACTOME_HS_GAG_DEGRADATION	19	-0.680985	-1.74216	0.00792079	0.059928	0.511	3721	tags=53%, list=18%, signal=64%
KEGG_ECM_RECEPTOR_INTERACTION	81	-0.569867	-1.71751	0	0.0599543	0.593	3015	tags=42%, list=15%, signal=49%
REACTOME_TRANSCRIPTIONAL_REGULATION_OF_WHITE_ADIPOCYTE_DIFFERENTIATION	53	-0.508694	-1.71131	0	0.0600427	0.613	2362	tags=34%, list=11%, signal=38%
REACTOME_SIGNALING_BY_NOTCH	92	-0.490494	-1.70632	0.013834	0.0600893	0.623	4939	tags=45%, list=24%, signal=58%
REACTOME_HEPARAN_SULFATE_HEPARIN_HS_GAG_METABOLISM	45	-0.503014	-1.72817	0.0059761	0.0602335	0.559	3865	tags=38%, list=19%, signal=46%
PID_PTP1B_PATHWAY	52	-0.517834	-1.72153	0.00394477	0.0603143	0.581	3084	tags=38%, list=15%, signal=45%
KEGG_ADHERENS_JUNCTION	73	-0.470385	-1.72568	0.00775194	0.0604995	0.565	4257	tags=42%, list=21%, signal=53%
PID_TNF_PATHWAY	43	-0.502654	-1.72315	0.0163934	0.0605714	0.575	6193	tags=60%, list=30%, signal=86%
PID_INTEGRIN_A4B1_PATHWAY	33	-0.567288	-1.73614	0.00986193	0.0606219	0.531	2179	tags=30%, list=11%, signal=34%
KEGG_CHRONIC_MYELOID_LEUKEMIA	72	-0.504713	-1.69607	0.011236	0.0607673	0.651	5570	tags=47%, list=27%, signal=64%
PID_CXCR4_PATHWAY	97	-0.424427	-1.68993	0.0115607	0.0610763	0.665	5168	tags=38%, list=25%, signal=51%
BIOCARTA_TID_PATHWAY	19	-0.631036	-1.70681	0.015444	0.0611504	0.623	3129	tags=58%, list=15%, signal=68%
REACTOME_SIGNALING_BY_HIPPO	19	-0.735655	-1.69368	0	0.0612169	0.657	2987	tags=63%, list=14%, signal=74%
PID_EPHRINB_REV_PATHWAY	30	-0.520449	-1.71385	0.015444	0.0612199	0.604	270	tags=13%, list=1%, signal=13%
PID_ARF6_PATHWAY	28	-0.594298	-1.70087	0.00943396	0.0612244	0.639	2190	tags=39%, list=11%, signal=44%
PID_ARF6_TRAFFICKING_PATHWAY	45	-0.513433	-1.73091	0.00559702	0.0615983	0.555	1882	tags=29%, list=9%, signal=32%
KEGG_TIGHT_JUNCTION	125	-0.414277	-1.69849	0.00943396	0.0616353	0.647	3417	tags=28%, list=17%, signal=33%
REACTOME_PPARA_ACTIVATES_GENE_EXPRESSION	84	-0.440483	-1.73311	0.0038835	0.0617118	0.55	2311	tags=26%, list=11%, signal=29%
ST_B_CELL_ANTIGEN_RECEPTOR	39	-0.468948	-1.69658	0.00195695	0.0617887	0.65	7269	tags=67%, list=35%, signal=103%
REACTOME_INTEGRIN_CELL_SURFACE_INTERACTIONS	78	-0.542771	-1.6903	0.00581395	0.0619497	0.665	2618	tags=35%, list=13%, signal=40%
BIOCARTA_RELA_PATHWAY	16	-0.63871	-1.6817	0.0320641	0.0624338	0.7	2215	tags=44%, list=11%, signal=49%
BIOCARTA_DEATH_PATHWAY	32	-0.553924	-1.68218	0.0134357	0.063112	0.699	3049	tags=41%, list=15%, signal=48%
PID_FGF_PATHWAY	55	-0.464098	-1.68492	0.0113208	0.0631719	0.685	3805	tags=36%, list=18%, signal=44%
REACTOME_THROMBIN_SIGNALLING_THROUGH_PROTEINASE_ACTIVATED_RECEPTORS_PARS	30	-0.471121	-1.68239	0.024952	0.0640895	0.698	3621	tags=40%, list=18%, signal=48%
ST_G_ALPHA_I_PATHWAY	35	-0.462371	-1.68515	0.0169811	0.0641729	0.685	3328	tags=31%, list=16%, signal=37%
REACTOME_ANTIGEN_ACTIVATES_B_CELL_RECEPTOR_LEADING_TO_GENERATION_OF_SECOND_MESSENGERS	28	-0.48364	-1.67339	0.0359168	0.067635	0.721	7363	tags=68%, list=36%, signal=105%
BIOCARTA_MYOSIN_PATHWAY	30	-0.500362	-1.67107	0.0302419	0.0681594	0.729	3949	tags=40%, list=19%, signal=49%
REACTOME_REGULATION_OF_SIGNALING_BY_CBL	18	-0.559494	-1.66497	0.0199601	0.0699879	0.745	5394	tags=39%, list=26%, signal=53%
KEGG_PATHWAYS_IN_CANCER	315	-0.379615	-1.65297	0.00184502	0.0702641	0.773	4257	tags=34%, list=21%, signal=42%
PID_ATF2_PATHWAY	56	-0.513718	-1.66314	0.0217391	0.0703566	0.746	3560	tags=45%, list=17%, signal=54%
BIOCARTA_NFKB_PATHWAY	22	-0.6254	-1.66567	0.0309478	0.0705076	0.744	2460	tags=45%, list=12%, signal=52%
PID_INTEGRIN5_PATHWAY	17	-0.665327	-1.65979	0.0119522	0.0707503	0.754	936	tags=29%, list=5%, signal=31%
PID_NFKAPPAB_ATYPICAL_PATHWAY	17	-0.570132	-1.65816	0.00998004	0.0709898	0.757	977	tags=29%, list=5%, signal=31%
BIOCARTA_HIVNEF_PATHWAY	55	-0.453293	-1.66079	0.018797	0.0710107	0.751	4225	tags=36%, list=21%, signal=46%
PID_TRAIL_PATHWAY	28	-0.542056	-1.65021	0.0219561	0.071193	0.782	2460	tags=29%, list=12%, signal=32%
PID_ECADHERIN_STABILIZATION_PATHWAY	41	-0.525873	-1.65303	0.03125	0.0712126	0.773	4257	tags=51%, list=21%, signal=64%
PID_HES_HEY_PATHWAY	44	-0.521114	-1.6489	0.0221811	0.0713193	0.786	3686	tags=45%, list=18%, signal=55%
KEGG_LEUKOCYTE_TRANSENDOTHELIAL_MIGRATION	107	-0.443715	-1.64775	0.0139442	0.071339	0.787	4325	tags=36%, list=21%, signal=45%
PID_RHOA_REG_PATHWAY	42	-0.439604	-1.65648	0.014652	0.0715084	0.764	3949	tags=45%, list=19%, signal=56%
BIOCARTA_ALK_PATHWAY	36	-0.579383	-1.66578	0.0341556	0.0715328	0.744	3374	tags=39%, list=16%, signal=46%
PID_AP1_PATHWAY	69	-0.492956	-1.65486	0.0163934	0.0716219	0.766	5060	tags=57%, list=25%, signal=75%
SIG_BCR_SIGNALING_PATHWAY	45	-0.47208	-1.65326	0.0153257	0.0720113	0.772	5570	tags=51%, list=27%, signal=70%
PID_MYC_REPRESS_PATHWAY	62	-0.489708	-1.6373	0.0239852	0.0753567	0.813	1380	tags=26%, list=7%, signal=28%
PID_HEDGEHOG_2PATHWAY	22	-0.548387	-1.6417	0.0130112	0.0756732	0.801	1894	tags=27%, list=9%, signal=30%
BIOCARTA_GSK3_PATHWAY	27	-0.602371	-1.63766	0.0248092	0.0759882	0.812	1906	tags=33%, list=9%, signal=37%
PID_HIF1_TFPATHWAY	60	-0.505111	-1.638	0.0331492	0.0766955	0.811	5082	tags=57%, list=25%, signal=75%
KEGG_GLYCINE_SERINE_AND_THREONINE_METABOLISM	31	-0.486239	-1.63801	0.0225564	0.0776269	0.811	1969	tags=32%, list=10%, signal=36%
PID_EPO_PATHWAY	34	-0.46133	-1.63205	0.0330275	0.0780881	0.832	2441	tags=29%, list=12%, signal=33%
PID_BETA_CATENIN_NUC_PATHWAY	76	-0.433467	-1.62627	0.00720721	0.0788847	0.842	4092	tags=38%, list=20%, signal=47%
KEGG_PROSTATE_CANCER	87	-0.443258	-1.6321	0.0111111	0.0789477	0.83	5299	tags=47%, list=26%, signal=63%
BIOCARTA_G1_PATHWAY	26	-0.544238	-1.6266	0.0220183	0.0794807	0.842	3233	tags=38%, list=16%, signal=46%
PID_S1P_S1P3_PATHWAY	25	-0.545305	-1.62941	0.0217822	0.0797191	0.837	3417	tags=36%, list=17%, signal=43%
PID_AVB3_OPN_PATHWAY	31	-0.585595	-1.62721	0.019305	0.0799122	0.841	3417	tags=42%, list=17%, signal=50%
KEGG_REGULATION_OF_ACTIN_CYTOSKELETON	196	-0.352473	-1.62753	0.00952381	0.0805794	0.84	4755	tags=33%, list=23%, signal=42%
PID_P38_ALPHA_BETA_PATHWAY	29	-0.465545	-1.61427	0.021611	0.0851933	0.864	2406	tags=28%, list=12%, signal=31%
PID_GLYPICAN_1PATHWAY	25	-0.639408	-1.61666	0.0201207	0.0858443	0.862	2103	tags=40%, list=10%, signal=44%
PID_VEGFR1_PATHWAY	24	-0.570638	-1.61459	0.0155642	0.0858684	0.863	7021	tags=79%, list=34%, signal=120%
BIOCARTA_MAPK_PATHWAY	85	-0.444412	-1.60721	0.00784314	0.0859878	0.882	5570	tags=52%, list=27%, signal=71%
PID_TCPTP_PATHWAY	40	-0.481596	-1.61509	0.023766	0.0863703	0.863	2377	tags=28%, list=12%, signal=31%
PID_SYNDECAN_4_PATHWAY	32	-0.606155	-1.60723	0.0271845	0.0868648	0.882	4776	tags=56%, list=23%, signal=73%
REACTOME_HEMOSTASIS	427	-0.347228	-1.60745	0.00184502	0.0875184	0.881	3438	tags=27%, list=17%, signal=32%
BIOCARTA_41BB_PATHWAY	17	-0.516403	-1.60832	0.0429688	0.0876369	0.879	3922	tags=47%, list=19%, signal=58%
KEGG_VASCULAR_SMOOTH_MUSCLE_CONTRACTION	110	-0.392878	-1.60837	0.0295203	0.0885343	0.879	5570	tags=48%, list=27%, signal=66%
KEGG_SMALL_CELL_LUNG_CANCER	82	-0.421604	-1.60939	0.00747664	0.0885817	0.876	3253	tags=28%, list=16%, signal=33%
PID_FAK_PATHWAY	57	-0.493067	-1.59847	0.0123711	0.0897529	0.902	3417	tags=39%, list=17%, signal=46%
KEGG_VIRAL_MYOCARDITIS	67	-0.41656	-1.59853	0.011194	0.0905838	0.902	4919	tags=39%, list=24%, signal=51%
PID_TXA2PATHWAY	55	-0.448363	-1.59955	0.0304183	0.0907416	0.901	2654	tags=31%, list=13%, signal=35%
PID_BCR_5PATHWAY	64	-0.418504	-1.59647	0.0246679	0.0908311	0.907	7363	tags=59%, list=36%, signal=92%
KEGG_INOSITOL_PHOSPHATE_METABOLISM	46	-0.442433	-1.59368	0.0111317	0.091183	0.91	5136	tags=43%, list=25%, signal=58%
REACTOME_PLATELET_ACTIVATION_SIGNALING_AND_AGGREGATION	186	-0.352952	-1.60005	0.0104895	0.0912609	0.901	4286	tags=33%, list=21%, signal=42%
REACTOME_TRANSCRIPTIONAL_ACTIVITY_OF_SMAD2_SMAD3_SMAD4_HETEROTRIMER	34	-0.449522	-1.59375	0.0151229	0.0919579	0.91	3727	tags=29%, list=18%, signal=36%
BIOCARTA_STRESS_PATHWAY	24	-0.477133	-1.58619	0.0379242	0.0955735	0.915	4153	tags=42%, list=20%, signal=52%
REACTOME_DEVELOPMENTAL_BIOLOGY	344	-0.346886	-1.5852	0.00184162	0.0956362	0.917	3762	tags=29%, list=18%, signal=35%
KEGG_B_CELL_RECEPTOR_SIGNALING_PATHWAY	71	-0.408822	-1.58741	0.0193798	0.096197	0.915	5937	tags=45%, list=29%, signal=63%
PID_AR_TF_PATHWAY	47	-0.40048	-1.58622	0.00383877	0.0964507	0.915	4788	tags=43%, list=23%, signal=55%
KEGG_MAPK_SIGNALING_PATHWAY	256	-0.326741	-1.57764	0.00932836	0.0992709	0.924	4215	tags=32%, list=20%, signal=40%
PID_INTEGRIN1_PATHWAY	64	-0.588205	-1.5783	0.00943396	0.099506	0.924	2140	tags=41%, list=10%, signal=45%
KEGG_GLIOMA	63	-0.43876	-1.57962	0.0211132	0.0999653	0.924	5570	tags=49%, list=27%, signal=67%
BIOCARTA_BCR_PATHWAY	33	-0.472311	-1.57851	0.0356436	0.100109	0.924	5570	tags=52%, list=27%, signal=70%
PID_TGFBR_PATHWAY	52	-0.50655	-1.57498	0.0426357	0.101113	0.927	4244	tags=40%, list=21%, signal=51%
PID_E2F_PATHWAY	65	-0.364429	-1.5625	0.0397727	0.111043	0.939	3489	tags=26%, list=17%, signal=31%
BIOCARTA_INTEGRIN_PATHWAY	37	-0.505058	-1.56297	0.05	0.111341	0.938	4286	tags=51%, list=21%, signal=65%
BIOCARTA_CD40_PATHWAY	15	-0.577851	-1.56084	0.046748	0.112171	0.941	2460	tags=40%, list=12%, signal=45%
BIOCARTA_WNT_PATHWAY	25	-0.608814	-1.56302	0.0174419	0.112262	0.938	4013	tags=52%, list=19%, signal=64%
WNT_SIGNALING	87	-0.355504	-1.5549	0.011194	0.11701	0.948	4259	tags=36%, list=21%, signal=45%
PID_IL6_7_PATHWAY	46	-0.505984	-1.55575	0.035316	0.117029	0.948	3259	tags=35%, list=16%, signal=41%
PID_AVB3_INTEGRIN_PATHWAY	72	-0.511278	-1.54892	0.0294659	0.120868	0.955	5202	tags=51%, list=25%, signal=69%
KEGG_WNT_SIGNALING_PATHWAY	144	-0.34905	-1.55019	0.00378072	0.121289	0.954	3489	tags=28%, list=17%, signal=33%
REACTOME_SIGNALING_BY_NOTCH1	61	-0.504015	-1.54922	0.0421687	0.121496	0.955	4077	tags=41%, list=20%, signal=51%
PID_SMAD2_3PATHWAY	16	-0.601322	-1.54628	0.0578842	0.122789	0.961	5202	tags=63%, list=25%, signal=84%
SA_B_CELL_RECEPTOR_COMPLEXES	24	-0.482998	-1.5424	0.0311891	0.126108	0.962	5501	tags=54%, list=27%, signal=74%
PID_HNF3A_PATHWAY	42	-0.409564	-1.53936	0.0148148	0.128669	0.967	2215	tags=26%, list=11%, signal=29%
BIOCARTA_PML_PATHWAY	17	-0.610434	-1.53775	0.0303605	0.129571	0.97	4706	tags=59%, list=23%, signal=76%
BIOCARTA_HER2_PATHWAY	22	-0.582717	-1.53439	0.0395257	0.13066	0.971	3526	tags=50%, list=17%, signal=60%
PID_FRA_PATHWAY	36	-0.613603	-1.53587	0.0364299	0.130736	0.97	5235	tags=61%, list=25%, signal=82%
PID_PDGFRA_PATHWAY	22	-0.551726	-1.53491	0.039548	0.130979	0.97	3259	tags=36%, list=16%, signal=43%
REACTOME_GLYCOSAMINOGLYCAN_METABOLISM	93	-0.427877	-1.53179	0.0327273	0.13196	0.975	3865	tags=34%, list=19%, signal=42%
PID_AMB2_NEUTROPHILS_PATHWAY	41	-0.496538	-1.53223	0.0329218	0.132325	0.975	3495	tags=32%, list=17%, signal=38%
REACTOME_SIGNALING_BY_RHO_GTPASES	100	-0.377954	-1.52956	0.00961539	0.133543	0.976	3838	tags=38%, list=19%, signal=46%
REACTOME_G_PROTEIN_BETA_GAMMA_SIGNALLING	26	-0.409166	-1.52276	0.0366599	0.141575	0.982	6993	tags=65%, list=34%, signal=99%
BIOCARTA_ETS_PATHWAY	18	-0.477894	-1.521	0.0524345	0.141669	0.982	4973	tags=56%, list=24%, signal=73%
REACTOME_SEMAPHORIN_INTERACTIONS	61	-0.427007	-1.52177	0.0416667	0.141859	0.982	6339	tags=52%, list=31%, signal=76%
REACTOME_MUSCLE_CONTRACTION	44	-0.47096	-1.5195	0.0731707	0.142473	0.983	4440	tags=45%, list=22%, signal=58%
REACTOME_G_ALPHA1213_SIGNALLING_EVENTS	72	-0.450558	-1.51709	0.0106157	0.144467	0.984	3838	tags=42%, list=19%, signal=51%
REACTOME_CELL_CELL_COMMUNICATION	111	-0.314545	-1.51365	0.00534759	0.14786	0.985	4278	tags=32%, list=21%, signal=40%
PID_INTEGRIN3_PATHWAY	42	-0.524033	-1.50561	0.0365385	0.155365	0.988	3208	tags=33%, list=16%, signal=39%
REACTOME_INTERFERON_GAMMA_SIGNALING	54	-0.483744	-1.50291	0.0563107	0.155736	0.99	2644	tags=31%, list=13%, signal=36%
REACTOME_SMOOTH_MUSCLE_CONTRACTION	21	-0.662661	-1.50584	0.0436433	0.156112	0.988	4440	tags=67%, list=22%, signal=85%
PID_VEGFR1_2_PATHWAY	65	-0.436357	-1.50332	0.0409357	0.156318	0.989	6206	tags=58%, list=30%, signal=83%
REACTOME_FATTY_ACID_TRIACYLGLYCEROL_AND_KETONE_BODY_METABOLISM	140	-0.389018	-1.50613	0.0215264	0.156759	0.988	2311	tags=24%, list=11%, signal=27%
PID_CDC42_REG_PATHWAY	29	-0.531965	-1.5038	0.0359281	0.156835	0.989	3374	tags=41%, list=16%, signal=49%
KEGG_RENAL_CELL_CARCINOMA	69	-0.449023	-1.50647	0.0360721	0.157375	0.988	3328	tags=32%, list=16%, signal=38%
KEGG_LYSINE_DEGRADATION	43	-0.442057	-1.49354	0.0554455	0.165604	0.992	4064	tags=42%, list=20%, signal=52%
REACTOME_GPVI_MEDIATED_ACTIVATION_CASCADE	30	-0.454894	-1.49111	0.0609982	0.165621	0.994	2377	tags=27%, list=12%, signal=30%
BIOCARTA_CHEMICAL_PATHWAY	21	-0.554504	-1.49508	0.0715667	0.165888	0.992	4919	tags=48%, list=24%, signal=62%
REACTOME_GAP_JUNCTION_TRAFFICKING	22	-0.576097	-1.49168	0.065666	0.165902	0.994	3012	tags=36%, list=15%, signal=43%
PID_ALK1_PATHWAY	26	-0.53494	-1.49239	0.0671937	0.165942	0.994	1828	tags=35%, list=9%, signal=38%
REACTOME_TIE2_SIGNALING	17	-0.569242	-1.49357	0.0254902	0.166681	0.992	2377	tags=29%, list=12%, signal=33%
BIOCARTA_CTCF_PATHWAY	22	-0.543701	-1.48809	0.0492126	0.168384	0.994	1264	tags=27%, list=6%, signal=29%
PID_IFNG_PATHWAY	38	-0.441159	-1.48464	0.0177866	0.172053	0.994	2460	tags=32%, list=12%, signal=36%
REACTOME_REGULATION_OF_KIT_SIGNALING	15	-0.513625	-1.48291	0.0773931	0.172154	0.994	3650	tags=33%, list=18%, signal=40%
PID_PI3KCI_PATHWAY	41	-0.420301	-1.48375	0.0472441	0.17224	0.994	2377	tags=24%, list=12%, signal=28%
REACTOME_ACTIVATED_NOTCH1_TRANSMITS_SIGNAL_TO_THE_NUCLEUS	25	-0.502142	-1.48039	0.0737052	0.173689	0.994	3884	tags=44%, list=19%, signal=54%
REACTOME_RESPONSE_TO_ELEVATED_PLATELET_CYTOSOLIC_CA2_	75	-0.395762	-1.47945	0.039783	0.174019	0.994	3887	tags=33%, list=19%, signal=41%
PID_SYNDECAN_3_PATHWAY	15	-0.563781	-1.48068	0.0706107	0.174308	0.994	3790	tags=53%, list=18%, signal=65%
PID_CMYB_PATHWAY	79	-0.388839	-1.47746	0.0238095	0.175659	0.994	2451	tags=24%, list=12%, signal=27%
KEGG_PANCREATIC_CANCER	69	-0.403093	-1.47158	0.0588235	0.176777	0.996	3328	tags=29%, list=16%, signal=34%
KEGG_INSULIN_SIGNALING_PATHWAY	131	-0.341713	-1.47079	0.0305927	0.17685	0.996	5940	tags=40%, list=29%, signal=55%
PID_HDAC_CLASSIII_PATHWAY	20	-0.458028	-1.46985	0.0467836	0.177178	0.996	5428	tags=55%, list=26%, signal=75%
REACTOME_SMAD2_SMAD3_SMAD4_HETEROTRIMER_REGULATES_TRANSCRIPTION	24	-0.461317	-1.47168	0.038817	0.177678	0.996	1994	tags=21%, list=10%, signal=23%
PID_HIV_NEF_PATHWAY	35	-0.433672	-1.47368	0.0944882	0.177878	0.995	4919	tags=43%, list=24%, signal=56%
ST_T_CELL_SIGNAL_TRANSDUCTION	44	-0.378166	-1.47221	0.0617284	0.177942	0.996	7269	tags=57%, list=35%, signal=88%
BIOCARTA_CALCINEURIN_PATHWAY	17	-0.631535	-1.47267	0.053719	0.1783	0.995	5526	tags=71%, list=27%, signal=96%
KEGG_ENDOMETRIAL_CANCER	51	-0.444411	-1.47415	0.0444874	0.17835	0.995	6396	tags=61%, list=31%, signal=88%
REACTOME_G_PROTEIN_ACTIVATION	26	-0.416464	-1.4747	0.0700389	0.178605	0.995	6875	tags=58%, list=33%, signal=86%
BIOCARTA_TEL_PATHWAY	18	-0.539971	-1.46787	0.0527344	0.17942	0.996	2974	tags=39%, list=14%, signal=45%
PID_HDAC_CLASSI_PATHWAY	64	-0.433232	-1.46654	0.0455487	0.180278	0.996	3599	tags=30%, list=17%, signal=36%
PID_NFKAPPAB_CANONICAL_PATHWAY	22	-0.525899	-1.46478	0.0729783	0.181767	0.996	2654	tags=32%, list=13%, signal=36%
ST_TUMOR_NECROSIS_FACTOR_PATHWAY	27	-0.456599	-1.46371	0.0914634	0.182377	0.996	2445	tags=30%, list=12%, signal=34%
PID_P53_DOWNSTREAM_PATHWAY	122	-0.367671	-1.45624	0.0239411	0.189716	0.997	3591	tags=33%, list=17%, signal=39%
REACTOME_INTEGRIN_ALPHAIIB_BETA3_SIGNALING	27	-0.425414	-1.45246	0.0718686	0.190042	0.997	4286	tags=33%, list=21%, signal=42%
KEGG_ABC_TRANSPORTERS	44	-0.462536	-1.45298	0.0574468	0.190267	0.997	2726	tags=30%, list=13%, signal=34%
REACTOME_APOPTOTIC_CLEAVAGE_OF_CELLULAR_PROTEINS	35	-0.515787	-1.45079	0.0574506	0.190434	0.998	4547	tags=57%, list=22%, signal=73%
PID_A6B1_A6B4_INTEGRIN_PATHWAY	46	-0.44894	-1.45636	0.0342342	0.190601	0.997	4182	tags=41%, list=20%, signal=52%
KEGG_BASAL_CELL_CARCINOMA	53	-0.465202	-1.45496	0.0702811	0.190624	0.997	3436	tags=36%, list=17%, signal=43%
BIOCARTA_NTHI_PATHWAY	23	-0.527545	-1.45111	0.114563	0.191031	0.997	2406	tags=39%, list=12%, signal=44%
KEGG_NOD_LIKE_RECEPTOR_SIGNALING_PATHWAY	51	-0.440311	-1.45391	0.0667976	0.191069	0.997	2406	tags=29%, list=12%, signal=33%
REACTOME_THROMBOXANE_SIGNALLING_THROUGH_TP_RECEPTOR	22	-0.423288	-1.45312	0.0661626	0.191137	0.997	3621	tags=36%, list=18%, signal=44%
BIOCARTA_IL1R_PATHWAY	31	-0.451667	-1.45735	0.0898204	0.191143	0.997	2509	tags=29%, list=12%, signal=33%
REACTOME_ABCA_TRANSPORTERS_IN_LIPID_HOMEOSTASIS	17	-0.550058	-1.45639	0.0903361	0.191622	0.997	2423	tags=35%, list=12%, signal=40%
REACTOME_PLATELET_HOMEOSTASIS	73	-0.326154	-1.44793	0.0269784	0.193562	0.998	3650	tags=25%, list=18%, signal=30%
REACTOME_CIRCADIAN_CLOCK	45	-0.472839	-1.44591	0.0663984	0.195508	0.998	2484	tags=31%, list=12%, signal=35%
KEGG_TGF_BETA_SIGNALING_PATHWAY	82	-0.410478	-1.44331	0.0584906	0.198411	0.998	3417	tags=34%, list=17%, signal=41%
REACTOME_SIGNALING_BY_BMP	21	-0.601977	-1.44232	0.103846	0.198674	0.998	3078	tags=52%, list=15%, signal=62%
ST_GRANULE_CELL_SURVIVAL_PATHWAY	26	-0.502316	-1.44139	0.0779468	0.198997	0.998	3374	tags=42%, list=16%, signal=51%
KEGG_BLADDER_CANCER	40	-0.457057	-1.43689	0.0568384	0.199366	0.998	5202	tags=48%, list=25%, signal=63%
REACTOME_REGULATION_OF_INSULIN_SECRETION_BY_GLUCAGON_LIKE_PEPTIDE1	41	-0.409664	-1.43955	0.0512295	0.199628	0.998	3018	tags=27%, list=15%, signal=31%
BIOCARTA_TOB1_PATHWAY	20	-0.56247	-1.44013	0.0589391	0.199846	0.998	1116	tags=30%, list=5%, signal=32%
REACTOME_SIGNALING_BY_ILS	98	-0.349171	-1.43701	0.045372	0.200198	0.998	2509	tags=21%, list=12%, signal=24%
BIOCARTA_FAS_PATHWAY	30	-0.433758	-1.43744	0.0674374	0.200494	0.998	3259	tags=33%, list=16%, signal=40%
KEGG_COLORECTAL_CANCER	61	-0.41825	-1.43754	0.0616822	0.201393	0.998	5570	tags=51%, list=27%, signal=69%
REACTOME_APOPTOTIC_EXECUTION_PHASE	48	-0.461154	-1.43383	0.054386	0.203124	0.998	4547	tags=46%, list=22%, signal=59%
REACTOME_G_BETA_GAMMA_SIGNALLING_THROUGH_PI3KGAMMA	23	-0.408747	-1.43238	0.0674603	0.203389	0.998	6875	tags=65%, list=33%, signal=98%
REACTOME_NEPHRIN_INTERACTIONS	18	-0.546359	-1.43105	0.0502092	0.204267	0.998	4244	tags=44%, list=21%, signal=56%
REACTOME_RIG_I_MDA5_MEDIATED_INDUCTION_OF_IFN_ALPHA_BETA_PATHWAYS	65	-0.376924	-1.43239	0.0646465	0.204403	0.998	3922	tags=32%, list=19%, signal=40%
PID_CD8_TCR_PATHWAY	51	-0.343666	-1.42665	0.0667939	0.210118	0.998	2654	tags=24%, list=13%, signal=27%
KEGG_ACUTE_MYELOID_LEUKEMIA	56	-0.374157	-1.42494	0.0741445	0.210736	0.998	5937	tags=46%, list=29%, signal=65%
BIOCARTA_TGFB_PATHWAY	18	-0.549476	-1.42422	0.0885122	0.210924	0.998	5393	tags=67%, list=26%, signal=90%
REACTOME_DOWNREGULATION_OF_SMAD2_3_SMAD4_TRANSCRIPTIONAL_ACTIVITY	17	-0.48725	-1.42545	0.0671937	0.210968	0.998	3727	tags=29%, list=18%, signal=36%
PID_TAP63_PATHWAY	52	-0.434139	-1.42008	0.0653846	0.216297	0.998	2646	tags=37%, list=13%, signal=42%
REACTOME_PRE_NOTCH_PROCESSING_IN_GOLGI	16	-0.449404	-1.4142	0.108527	0.223678	0.998	1243	tags=19%, list=6%, signal=20%
REACTOME_ABC_FAMILY_PROTEINS_MEDIATED_TRANSPORT	33	-0.461578	-1.40928	0.0745968	0.22454	0.998	2726	tags=27%, list=13%, signal=31%
KEGG_AXON_GUIDANCE	127	-0.356809	-1.41165	0.0359848	0.224608	0.998	5526	tags=41%, list=27%, signal=56%
REACTOME_CD28_DEPENDENT_PI3K_AKT_SIGNALING	19	-0.381273	-1.41428	0.0816327	0.224653	0.998	6917	tags=42%, list=34%, signal=63%
PID_UPA_UPAR_PATHWAY	39	-0.439452	-1.41069	0.0641822	0.225244	0.998	936	tags=18%, list=5%, signal=19%
PID_NECTIN_PATHWAY	30	-0.418163	-1.40994	0.0888889	0.22546	0.998	4257	tags=37%, list=21%, signal=46%
BIOCARTA_CARDIACEGF_PATHWAY	17	-0.600514	-1.4093	0.111742	0.225564	0.998	3417	tags=59%, list=17%, signal=70%
KEGG_PHOSPHATIDYLINOSITOL_SIGNALING_SYSTEM	67	-0.366453	-1.41168	0.0336449	0.225654	0.998	4625	tags=39%, list=22%, signal=50%
BIOCARTA_ATM_PATHWAY	20	-0.491392	-1.41213	0.0825336	0.226022	0.998	4032	tags=40%, list=20%, signal=50%
REACTOME_INTRINSIC_PATHWAY_FOR_APOPTOSIS	27	-0.408408	-1.40455	0.0711679	0.230856	0.998	5635	tags=44%, list=27%, signal=61%
KEGG_NON_SMALL_CELL_LUNG_CANCER	52	-0.377373	-1.39995	0.0744275	0.237464	0.999	5570	tags=42%, list=27%, signal=58%
REACTOME_SIGNALING_BY_TGF_BETA_RECEPTOR_COMPLEX	57	-0.380324	-1.39917	0.077634	0.237765	0.999	3753	tags=28%, list=18%, signal=34%
NABA_COLLAGENS	40	-0.591281	-1.39728	0.0881801	0.238676	1	3812	tags=45%, list=18%, signal=55%
REACTOME_NOTCH1_INTRACELLULAR_DOMAIN_REGULATES_TRANSCRIPTION	38	-0.516857	-1.3974	0.0893971	0.239566	1	4939	tags=47%, list=24%, signal=62%
BIOCARTA_P53_PATHWAY	16	-0.565803	-1.39386	0.107209	0.24238	1	3233	tags=44%, list=16%, signal=52%
NABA_BASEMENT_MEMBRANES	35	-0.555187	-1.3943	0.0837989	0.242776	1	2208	tags=40%, list=11%, signal=45%
REACTOME_HDL_MEDIATED_LIPID_TRANSPORT	15	-0.607759	-1.39116	0.0821643	0.244419	1	1519	tags=40%, list=7%, signal=43%
SIG_PIP3_SIGNALING_IN_B_LYMPHOCYTES	34	-0.391379	-1.39172	0.0934579	0.244636	1	5956	tags=47%, list=29%, signal=66%
PID_IL3_PATHWAY	27	-0.461146	-1.3849	0.0722656	0.248692	1	2331	tags=22%, list=11%, signal=25%
PID_BETA_CATENIN_DEG_PATHWAY	16	-0.485432	-1.38537	0.148515	0.248908	1	6396	tags=63%, list=31%, signal=91%
REACTOME_G_BETA_GAMMA_SIGNALLING_THROUGH_PLC_BETA	19	-0.435917	-1.38542	0.109312	0.249908	1	6993	tags=63%, list=34%, signal=96%
REACTOME_REGULATION_OF_HYPOXIA_INDUCIBLE_FACTOR_HIF_BY_OXYGEN	22	-0.505005	-1.38679	0.0864198	0.250798	1	4360	tags=45%, list=21%, signal=58%
PID_ERBB4_PATHWAY	37	-0.377844	-1.38552	0.0575816	0.250849	1	3416	tags=30%, list=17%, signal=36%
BIOCARTA_CXCR4_PATHWAY	23	-0.533361	-1.38587	0.14786	0.251245	1	5873	tags=57%, list=29%, signal=79%
PID_IL8_CXCR1_PATHWAY	25	-0.403125	-1.38129	0.100935	0.253755	1	2654	tags=24%, list=13%, signal=28%
PID_LYSOPHOSPHOLIPID_PATHWAY	62	-0.436093	-1.38053	0.11157	0.254004	1	6917	tags=63%, list=34%, signal=94%
REACTOME_RAP1_SIGNALLING	15	-0.495448	-1.37951	0.0846774	0.254776	1	3035	tags=33%, list=15%, signal=39%
PID_FCER1_PATHWAY	58	-0.380043	-1.3786	0.0947581	0.255244	1	2460	tags=28%, list=12%, signal=31%
KEGG_THYROID_CANCER	29	-0.448375	-1.37759	0.0863039	0.255922	1	4159	tags=41%, list=20%, signal=52%
PID_SYNDECAN_2_PATHWAY	32	-0.402763	-1.37568	0.0862385	0.257987	1	4637	tags=41%, list=23%, signal=52%
ST_FAS_SIGNALING_PATHWAY	58	-0.330496	-1.37433	0.0759259	0.259173	1	4013	tags=29%, list=19%, signal=36%
REACTOME_SIGNALING_BY_PDGF	111	-0.378236	-1.37359	0.0850662	0.259288	1	2654	tags=23%, list=13%, signal=26%
REACTOME_TRAF6_MEDIATED_NFKB_ACTIVATION	20	-0.492877	-1.37238	0.140594	0.260176	1	3922	tags=40%, list=19%, signal=49%
KEGG_GLYCOSAMINOGLYCAN_BIOSYNTHESIS_KERATAN_SULFATE	15	-0.486038	-1.37	0.151052	0.262899	1	5272	tags=40%, list=26%, signal=54%
PID_LYMPH_ANGIOGENESIS_PATHWAY	24	-0.4343	-1.36664	0.112167	0.267588	1	2406	tags=25%, list=12%, signal=28%
KEGG_GNRH_SIGNALING_PATHWAY	97	-0.294932	-1.36338	0.0761523	0.272044	1	5607	tags=44%, list=27%, signal=61%
REACTOME_COLLAGEN_FORMATION	56	-0.518028	-1.36127	0.10987	0.274646	1	2140	tags=34%, list=10%, signal=38%
PID_WNT_CANONICAL_PATHWAY	18	-0.469895	-1.35929	0.107356	0.276929	1	6675	tags=61%, list=32%, signal=90%
REACTOME_ION_TRANSPORT_BY_P_TYPE_ATPASES	31	-0.389754	-1.35826	0.0910781	0.277414	1	4208	tags=32%, list=20%, signal=40%
REACTOME_INHIBITION_OF_INSULIN_SECRETION_BY_ADRENALINE_NORADRENALINE	24	-0.430729	-1.35253	0.157143	0.284882	1	6875	tags=63%, list=33%, signal=94%
REACTOME_MYD88_MAL_CASCADE_INITIATED_ON_PLASMA_MEMBRANE	73	-0.363427	-1.35186	0.0817844	0.284884	1	4215	tags=40%, list=20%, signal=50%
ST_WNT_CA2_CYCLIC_GMP_PATHWAY	20	-0.410503	-1.35273	0.102857	0.285643	1	3294	tags=35%, list=16%, signal=42%
KEGG_CALCIUM_SIGNALING_PATHWAY	171	-0.290113	-1.34968	0.0461812	0.287789	1	4399	tags=28%, list=21%, signal=35%
PID_BMP_PATHWAY	38	-0.458899	-1.34775	0.0996169	0.290078	1	3328	tags=42%, list=16%, signal=50%
PID_TELOMERASE_PATHWAY	65	-0.398967	-1.34649	0.112621	0.291184	1	5324	tags=45%, list=26%, signal=60%
BIOCARTA_ERK_PATHWAY	27	-0.462214	-1.34365	0.14786	0.291542	1	3447	tags=41%, list=17%, signal=49%
REACTOME_INWARDLY_RECTIFYING_K_CHANNELS	30	-0.388663	-1.34521	0.105769	0.292399	1	5055	tags=43%, list=25%, signal=57%
PID_P73PATHWAY	70	-0.341187	-1.34367	0.0912548	0.292639	1	2749	tags=21%, list=13%, signal=25%
PID_ECADHERIN_KERATINOCYTE_PATHWAY	21	-0.480679	-1.34411	0.147059	0.293063	1	5299	tags=57%, list=26%, signal=77%
PID_WNT_NONCANONICAL_PATHWAY	30	-0.445434	-1.34204	0.104331	0.293355	1	1087	tags=23%, list=5%, signal=25%
REACTOME_AMINO_ACID_AND_OLIGOPEPTIDE_SLC_TRANSPORTERS	48	-0.375342	-1.33991	0.0815534	0.293942	1	2626	tags=21%, list=13%, signal=24%
REACTOME_TRAF6_MEDIATED_INDUCTION_OF_NFKB_AND_MAP_KINASES_UPON_TLR7_8_OR_9_ACTIVATION	67	-0.365692	-1.34092	0.0938697	0.294436	1	4215	tags=40%, list=20%, signal=50%
REACTOME_HS_GAG_BIOSYNTHESIS	29	-0.403992	-1.34016	0.105578	0.294671	1	4347	tags=38%, list=21%, signal=48%
PID_INTEGRIN_A9B1_PATHWAY	23	-0.503077	-1.33394	0.12806	0.303613	1	4286	tags=43%, list=21%, signal=55%
BIOCARTA_TCR_PATHWAY	44	-0.372815	-1.33199	0.126679	0.305973	1	3420	tags=30%, list=17%, signal=35%
KEGG_MELANOGENESIS	98	-0.315014	-1.32835	0.0815217	0.309291	1	3456	tags=28%, list=17%, signal=33%
REACTOME_EXTRACELLULAR_MATRIX_ORGANIZATION	83	-0.462765	-1.3293	0.122371	0.310107	1	2254	tags=27%, list=11%, signal=30%
REACTOME_ACTIVATED_TLR4_SIGNALLING	83	-0.352054	-1.32852	0.0970149	0.310179	1	4215	tags=37%, list=20%, signal=47%
BIOCARTA_RACCYCD_PATHWAY	26	-0.502678	-1.32475	0.176471	0.314616	1	3417	tags=35%, list=17%, signal=41%
BIOCARTA_CERAMIDE_PATHWAY	21	-0.466326	-1.32365	0.164583	0.3154	1	6076	tags=62%, list=29%, signal=88%
REACTOME_NEGATIVE_REGULATORS_OF_RIG_I_MDA5_SIGNALING	25	-0.474944	-1.32238	0.144841	0.316423	1	3859	tags=36%, list=19%, signal=44%
BIOCARTA_CCR5_PATHWAY	15	-0.567987	-1.31908	0.141199	0.321441	1	3259	tags=40%, list=16%, signal=47%
ST_ERK1_ERK2_MAPK_PATHWAY	31	-0.418776	-1.31831	0.117409	0.321593	1	3669	tags=45%, list=18%, signal=55%
BIOCARTA_KERATINOCYTE_PATHWAY	44	-0.396125	-1.31432	0.153696	0.326784	1	4177	tags=43%, list=20%, signal=54%
PID_NEPHRIN_NEPH1_PATHWAY	31	-0.419422	-1.31355	0.160083	0.326907	1	5928	tags=42%, list=29%, signal=59%
REACTOME_INHIBITION_OF_VOLTAGE_GATED_CA2_CHANNELS_VIA_GBETA_GAMMA_SUBUNITS	24	-0.41775	-1.31463	0.137525	0.327224	1	3701	tags=38%, list=18%, signal=46%
BIOCARTA_PTEN_PATHWAY	17	-0.473069	-1.31105	0.130526	0.330298	1	7850	tags=82%, list=38%, signal=133%
PID_ALPHA_SYNUCLEIN_PATHWAY	33	-0.375706	-1.31025	0.122363	0.330697	1	5394	tags=36%, list=26%, signal=49%
REACTOME_AXON_GUIDANCE	232	-0.33022	-1.30706	0.0925926	0.334325	1	4512	tags=32%, list=22%, signal=40%
PID_S1P_S1P1_PATHWAY	19	-0.42648	-1.30738	0.121457	0.33496	1	6993	tags=58%, list=34%, signal=88%
ST_P38_MAPK_PATHWAY	34	-0.420235	-1.30586	0.161736	0.335351	1	3328	tags=35%, list=16%, signal=42%
PID_RHOA_PATHWAY	42	-0.390759	-1.30282	0.144269	0.338322	1	6339	tags=48%, list=31%, signal=69%
ST_INTERLEUKIN_4_PATHWAY	26	-0.34757	-1.3033	0.117534	0.338668	1	3569	tags=27%, list=17%, signal=33%
REACTOME_TAK1_ACTIVATES_NFKB_BY_PHOSPHORYLATION_AND_ACTIVATION_OF_IKKS_COMPLEX	18	-0.428872	-1.29891	0.184061	0.344855	1	3495	tags=33%, list=17%, signal=40%
BIOCARTA_HSP27_PATHWAY	15	-0.463334	-1.29567	0.154618	0.348572	1	2445	tags=33%, list=12%, signal=38%
BIOCARTA_UCALPAIN_PATHWAY	16	-0.410615	-1.29569	0.152964	0.349764	1	4225	tags=44%, list=21%, signal=55%
BIOCARTA_MET_PATHWAY	36	-0.409035	-1.29413	0.153696	0.350258	1	4515	tags=39%, list=22%, signal=50%
PID_SYNDECAN_1_PATHWAY	46	-0.501739	-1.28865	0.155722	0.358099	1	3843	tags=41%, list=19%, signal=51%
BIOCARTA_ECM_PATHWAY	23	-0.46631	-1.28769	0.209901	0.358623	1	3417	tags=43%, list=17%, signal=52%
KEGG_GAP_JUNCTION	75	-0.392838	-1.28887	0.137787	0.358999	1	5570	tags=48%, list=27%, signal=66%
PID_THROMBIN_PAR1_PATHWAY	42	-0.342623	-1.28378	0.188259	0.364824	1	6993	tags=57%, list=34%, signal=86%
BIOCARTA_P53HYPOXIA_PATHWAY	22	-0.460893	-1.28027	0.19708	0.370452	1	2482	tags=32%, list=12%, signal=36%
REACTOME_PROSTACYCLIN_SIGNALLING_THROUGH_PROSTACYCLIN_RECEPTOR	18	-0.446271	-1.27895	0.180498	0.371738	1	3621	tags=33%, list=18%, signal=40%
KEGG_ENDOCYTOSIS	157	-0.347879	-1.27444	0.133745	0.376546	1	3444	tags=25%, list=17%, signal=30%
BIOCARTA_MITOCHONDRIA_PATHWAY	18	-0.444504	-1.27509	0.183794	0.376602	1	3049	tags=28%, list=15%, signal=33%
KEGG_ERBB_SIGNALING_PATHWAY	85	-0.355928	-1.27563	0.175758	0.376815	1	5570	tags=42%, list=27%, signal=58%
BIOCARTA_TFF_PATHWAY	21	-0.426578	-1.27362	0.189084	0.376886	1	5202	tags=48%, list=25%, signal=64%
PID_PDGFRB_PATHWAY	123	-0.374725	-1.27194	0.184314	0.377574	1	4776	tags=35%, list=23%, signal=45%
BIOCARTA_AGR_PATHWAY	35	-0.421683	-1.27207	0.129512	0.378608	1	4653	tags=40%, list=23%, signal=52%
KEGG_CHEMOKINE_SIGNALING_PATHWAY	173	-0.293117	-1.26777	0.0803922	0.381758	1	3417	tags=22%, list=17%, signal=26%
KEGG_MTOR_SIGNALING_PATHWAY	46	-0.344612	-1.26777	0.121339	0.383046	1	6206	tags=43%, list=30%, signal=62%
REACTOME_ACTIVATED_AMPK_STIMULATES_FATTY_ACID_OXIDATION_IN_MUSCLE	16	-0.434359	-1.26789	0.173077	0.384122	1	3162	tags=31%, list=15%, signal=37%
REACTOME_P75_NTR_RECEPTOR_MEDIATED_SIGNALLING	76	-0.397892	-1.26424	0.184805	0.387213	1	4281	tags=42%, list=21%, signal=53%
REACTOME_AMINO_ACID_TRANSPORT_ACROSS_THE_PLASMA_MEMBRANE	30	-0.410258	-1.26141	0.158607	0.391294	1	2626	tags=23%, list=13%, signal=27%
BIOCARTA_MEF2D_PATHWAY	18	-0.497213	-1.25994	0.216963	0.391449	1	5526	tags=56%, list=27%, signal=76%
PID_S1P_S1P2_PATHWAY	23	-0.488437	-1.26035	0.240631	0.392039	1	3417	tags=39%, list=17%, signal=47%
KEGG_LONG_TERM_DEPRESSION	66	-0.309536	-1.25723	0.132184	0.395468	1	5698	tags=45%, list=28%, signal=63%
PID_IL1_PATHWAY	32	-0.350895	-1.25435	0.184906	0.399558	1	4194	tags=28%, list=20%, signal=35%
KEGG_VEGF_SIGNALING_PATHWAY	71	-0.285308	-1.24394	0.153257	0.403979	1	5608	tags=44%, list=27%, signal=60%
REACTOME_TRANSMEMBRANE_TRANSPORT_OF_SMALL_MOLECULES	396	-0.252506	-1.24943	0.038674	0.404938	1	2852	tags=18%, list=14%, signal=21%
BIOCARTA_IL6_PATHWAY	22	-0.489457	-1.25013	0.238274	0.404953	1	3259	tags=41%, list=16%, signal=49%
REACTOME_TRIF_MEDIATED_TLR3_SIGNALING	65	-0.32786	-1.24408	0.143678	0.405026	1	4215	tags=37%, list=20%, signal=46%
BIOCARTA_TOLL_PATHWAY	34	-0.401483	-1.24797	0.207317	0.405266	1	2460	tags=26%, list=12%, signal=30%
BIOCARTA_MCALPAIN_PATHWAY	23	-0.421282	-1.24449	0.214971	0.405481	1	3328	tags=35%, list=16%, signal=41%
PID_INSULIN_PATHWAY	42	-0.399743	-1.25051	0.205231	0.405604	1	3412	tags=21%, list=17%, signal=26%
REACTOME_TOLL_RECEPTOR_CASCADES	104	-0.322588	-1.24714	0.149057	0.405672	1	4215	tags=35%, list=20%, signal=43%
REACTOME_CYTOKINE_SIGNALING_IN_IMMUNE_SYSTEM	245	-0.28926	-1.24821	0.141805	0.406019	1	3899	tags=26%, list=19%, signal=31%
REACTOME_ANTIGEN_PRESENTATION_FOLDING_ASSEMBLY_AND_PEPTIDE_LOADING_OF_CLASS_I_MHC	18	-0.552305	-1.24523	0.270378	0.406646	1	3889	tags=44%, list=19%, signal=55%
REACTOME_ACTIVATION_OF_BH3_ONLY_PROTEINS	16	-0.394977	-1.24453	0.203704	0.406704	1	5635	tags=50%, list=27%, signal=69%
KEGG_EPITHELIAL_CELL_SIGNALING_IN_HELICOBACTER_PYLORI_INFECTION	62	-0.393759	-1.24541	0.211462	0.407598	1	2445	tags=27%, list=12%, signal=31%
PID_RETINOIC_ACID_PATHWAY	28	-0.374053	-1.24026	0.210317	0.409702	1	3599	tags=29%, list=17%, signal=35%
KEGG_AMYOTROPHIC_LATERAL_SCLEROSIS_ALS	49	-0.37941	-1.23722	0.172996	0.414194	1	2482	tags=22%, list=12%, signal=25%
KEGG_P53_SIGNALING_PATHWAY	64	-0.354439	-1.23541	0.18985	0.415135	1	3591	tags=30%, list=17%, signal=36%
REACTOME_TRANSPORT_OF_INORGANIC_CATIONS_ANIONS_AND_AMINO_ACIDS_OLIGOPEPTIDES	90	-0.299271	-1.23601	0.124498	0.415215	1	2821	tags=20%, list=14%, signal=23%
REACTOME_CELL_JUNCTION_ORGANIZATION	71	-0.327217	-1.23329	0.167308	0.417813	1	3286	tags=28%, list=16%, signal=33%
PID_EPHA_FWDPATHWAY	33	-0.370826	-1.23191	0.165692	0.41924	1	2764	tags=30%, list=13%, signal=35%
PID_AJDISS_2PATHWAY	47	-0.367169	-1.23014	0.171735	0.419821	1	3805	tags=43%, list=18%, signal=52%
BIOCARTA_NO1_PATHWAY	29	-0.366513	-1.23018	0.130671	0.421067	1	623	tags=14%, list=3%, signal=14%
BIOCARTA_NKCELLS_PATHWAY	18	-0.38641	-1.22611	0.176923	0.426315	1	3650	tags=33%, list=18%, signal=40%
REACTOME_TRANSPORT_OF_GLUCOSE_AND_OTHER_SUGARS_BILE_SALTS_AND_ORGANIC_ACIDS_METAL_IONS_AND_AMINE_COMPOUNDS	85	-0.372847	-1.22494	0.151697	0.427335	1	2580	tags=24%, list=13%, signal=27%
PID_NETRIN_PATHWAY	31	-0.50086	-1.22098	0.287281	0.430922	1	4286	tags=52%, list=21%, signal=65%
REACTOME_SIGNALING_BY_ROBO_RECEPTOR	29	-0.473939	-1.22217	0.233906	0.431135	1	5544	tags=45%, list=27%, signal=61%
REACTOME_ADP_SIGNALLING_THROUGH_P2RY12	20	-0.413017	-1.22136	0.180233	0.431481	1	6875	tags=60%, list=33%, signal=90%
REACTOME_N_GLYCAN_ANTENNAE_ELONGATION_IN_THE_MEDIAL_TRANS_GOLGI	18	-0.399769	-1.21833	0.220039	0.434911	1	5942	tags=50%, list=29%, signal=70%
REACTOME_NUCLEAR_SIGNALING_BY_ERBB4	35	-0.335175	-1.21566	0.189293	0.438785	1	618	tags=11%, list=3%, signal=12%
REACTOME_PEPTIDE_CHAIN_ELONGATION	78	-0.640008	-1.21458	0.268293	0.439667	1	6406	tags=86%, list=31%, signal=124%
PID_RAC1_REG_PATHWAY	36	-0.443799	-1.20748	0.267578	0.441264	1	2811	tags=33%, list=14%, signal=39%
BIOCARTA_CARM_ER_PATHWAY	32	-0.408466	-1.21021	0.248	0.441346	1	6367	tags=56%, list=31%, signal=81%
REACTOME_CTLA4_INHIBITORY_SIGNALING	21	-0.327225	-1.2107	0.242126	0.441623	1	7340	tags=57%, list=36%, signal=89%
KEGG_PATHOGENIC_ESCHERICHIA_COLI_INFECTION	43	-0.44973	-1.20918	0.245136	0.442042	1	4732	tags=37%, list=23%, signal=48%
PID_TCR_PATHWAY	64	-0.261992	-1.2077	0.192607	0.442206	1	2654	tags=19%, list=13%, signal=21%
PID_FAS_PATHWAY	37	-0.327236	-1.21091	0.208092	0.442548	1	2460	tags=22%, list=12%, signal=25%
PID_HEDGEHOG_GLI_PATHWAY	48	-0.369827	-1.20802	0.27234	0.44289	1	6424	tags=48%, list=31%, signal=69%
BIOCARTA_IL7_PATHWAY	17	-0.371559	-1.20581	0.188867	0.443265	1	2215	tags=24%, list=11%, signal=26%
PID_MET_PATHWAY	76	-0.378487	-1.21101	0.258197	0.443673	1	4286	tags=34%, list=21%, signal=43%
NABA_PROTEOGLYCANS	29	-0.48195	-1.21124	0.243948	0.444529	1	2152	tags=31%, list=10%, signal=35%
REACTOME_GRB2_SOS_PROVIDES_LINKAGE_TO_MAPK_SIGNALING_FOR_INTERGRINS_	15	-0.44884	-1.20251	0.244939	0.4472	1	2124	tags=27%, list=10%, signal=30%
REACTOME_CD28_CO_STIMULATION	29	-0.320874	-1.20311	0.237721	0.447292	1	2377	tags=14%, list=12%, signal=16%
REACTOME_NETRIN1_SIGNALING	37	-0.341909	-1.19713	0.178571	0.456339	1	4225	tags=35%, list=21%, signal=44%
REACTOME_FORMATION_OF_THE_TERNARY_COMPLEX_AND_SUBSEQUENTLY_THE_43S_COMPLEX	36	-0.588292	-1.19457	0.328512	0.457471	1	6406	tags=81%, list=31%, signal=117%
REACTOME_LIPID_DIGESTION_MOBILIZATION_AND_TRANSPORT	43	-0.37977	-1.19501	0.257367	0.457892	1	1668	tags=21%, list=8%, signal=23%
PID_EPHA2_FWD_PATHWAY	18	-0.53092	-1.19546	0.307536	0.458328	1	4286	tags=56%, list=21%, signal=70%
ST_GAQ_PATHWAY	27	-0.340928	-1.19281	0.244782	0.459234	1	2422	tags=19%, list=12%, signal=21%
REACTOME_FACTORS_INVOLVED_IN_MEGAKARYOCYTE_DEVELOPMENT_AND_PLATELET_PRODUCTION	117	-0.275065	-1.18862	0.125	0.463406	1	2881	tags=22%, list=14%, signal=26%
BIOCARTA_TNFR1_PATHWAY	29	-0.354425	-1.18929	0.274704	0.463486	1	4153	tags=34%, list=20%, signal=43%
KEGG_PRION_DISEASES	35	-0.33995	-1.18941	0.181989	0.464554	1	4512	tags=37%, list=22%, signal=47%
REACTOME_OXYGEN_DEPENDENT_PROLINE_HYDROXYLATION_OF_HYPOXIA_INDUCIBLE_FACTOR_ALPHA	16	-0.521857	-1.18702	0.277056	0.465205	1	4360	tags=50%, list=21%, signal=63%
NABA_CORE_MATRISOME	238	-0.384193	-1.18553	0.242086	0.466731	1	2856	tags=28%, list=14%, signal=32%
REACTOME_ACTIVATION_OF_THE_MRNA_UPON_BINDING_OF_THE_CAP_BINDING_COMPLEX_AND_EIFS_AND_SUBSEQUENT_BINDING_TO_43S	43	-0.566346	-1.18311	0.338174	0.470275	1	6406	tags=77%, list=31%, signal=111%
BIOCARTA_PTDINS_PATHWAY	23	-0.442192	-1.18199	0.297071	0.471013	1	7078	tags=57%, list=34%, signal=86%
BIOCARTA_RHO_PATHWAY	31	-0.366535	-1.18065	0.260116	0.472419	1	3662	tags=32%, list=18%, signal=39%
BIOCARTA_ARF_PATHWAY	17	-0.385436	-1.17863	0.221818	0.47484	1	3233	tags=29%, list=16%, signal=35%
REACTOME_P130CAS_LINKAGE_TO_MAPK_SIGNALING_FOR_INTEGRINS	15	-0.443997	-1.17673	0.253036	0.477141	1	4890	tags=47%, list=24%, signal=61%
PID_CDC42_PATHWAY	67	-0.399685	-1.1733	0.30989	0.482266	1	4286	tags=34%, list=21%, signal=43%
REACTOME_TIGHT_JUNCTION_INTERACTIONS	28	-0.398716	-1.17173	0.281369	0.48258	1	2908	tags=25%, list=14%, signal=29%
REACTOME_3_UTR_MEDIATED_TRANSLATIONAL_REGULATION	86	-0.605502	-1.17225	0.333333	0.482927	1	6406	tags=81%, list=31%, signal=118%
REACTOME_INTERFERON_ALPHA_BETA_SIGNALING	59	-0.378567	-1.16856	0.263366	0.485714	1	3134	tags=31%, list=15%, signal=36%
REACTOME_NITRIC_OXIDE_STIMULATES_GUANYLATE_CYCLASE	24	-0.403805	-1.16884	0.259048	0.486568	1	1858	tags=21%, list=9%, signal=23%
BIOCARTA_CASPASE_PATHWAY	22	-0.373456	-1.16681	0.292585	0.487602	1	4919	tags=36%, list=24%, signal=48%
REACTOME_COMPLEMENT_CASCADE	28	-0.501756	-1.16546	0.306324	0.488907	1	4828	tags=43%, list=23%, signal=56%
PID_REG_GR_PATHWAY	81	-0.270873	-1.16457	0.212341	0.48948	1	5202	tags=36%, list=25%, signal=48%
SA_CASPASE_CASCADE	18	-0.400711	-1.16342	0.272908	0.490397	1	4919	tags=50%, list=24%, signal=66%
REACTOME_GLYCOGEN_BREAKDOWN_GLYCOGENOLYSIS	16	-0.487214	-1.16234	0.320866	0.491082	1	6704	tags=56%, list=33%, signal=83%
PID_S1P_META_PATHWAY	16	-0.398286	-1.16131	0.3	0.491635	1	6902	tags=63%, list=33%, signal=94%
KEGG_BIOSYNTHESIS_OF_UNSATURATED_FATTY_ACIDS	19	-0.394685	-1.1602	0.30315	0.492273	1	3906	tags=42%, list=19%, signal=52%
REACTOME_ENOS_ACTIVATION_AND_REGULATION	18	-0.451103	-1.15944	0.287879	0.492439	1	206	tags=11%, list=1%, signal=11%
REACTOME_NUCLEAR_RECEPTOR_TRANSCRIPTION_PATHWAY	44	-0.314019	-1.15814	0.274	0.493634	1	4771	tags=34%, list=23%, signal=44%
REACTOME_GABA_B_RECEPTOR_ACTIVATION	37	-0.35951	-1.15301	0.277778	0.499546	1	5168	tags=46%, list=25%, signal=61%
PID_IL8_CXCR2_PATHWAY	30	-0.320526	-1.15338	0.251923	0.500254	1	2654	tags=23%, list=13%, signal=27%
KEGG_MELANOMA	71	-0.30735	-1.15176	0.227723	0.500593	1	5299	tags=39%, list=26%, signal=53%
PID_ERBB_NETWORK_PATHWAY	15	-0.435511	-1.15381	0.270115	0.500697	1	734	tags=27%, list=4%, signal=28%
REACTOME_PLATELET_AGGREGATION_PLUG_FORMATION	36	-0.338493	-1.14258	0.292783	0.512979	1	2331	tags=17%, list=11%, signal=19%
REACTOME_AMINE_COMPOUND_SLC_TRANSPORTERS	27	-0.448904	-1.14321	0.302554	0.512984	1	1071	tags=19%, list=5%, signal=20%
REACTOME_NFKB_AND_MAP_KINASES_ACTIVATION_MEDIATED_BY_TLR4_SIGNALING_REPERTOIRE	63	-0.33274	-1.14365	0.277154	0.513483	1	4215	tags=38%, list=20%, signal=48%
REACTOME_FATTY_ACYL_COA_BIOSYNTHESIS	17	-0.444025	-1.14384	0.299803	0.514479	1	1593	tags=29%, list=8%, signal=32%
PID_CERAMIDE_PATHWAY	47	-0.317217	-1.13729	0.312127	0.515103	1	6076	tags=47%, list=29%, signal=66%
REACTOME_NCAM1_INTERACTIONS	37	-0.387891	-1.13754	0.326126	0.515893	1	2872	tags=30%, list=14%, signal=34%
PID_RET_PATHWAY	39	-0.385744	-1.14018	0.358921	0.516187	1	4286	tags=36%, list=21%, signal=45%
NABA_ECM_AFFILIATED	137	-0.362763	-1.13799	0.316832	0.516416	1	3574	tags=30%, list=17%, signal=36%
REACTOME_NCAM_SIGNALING_FOR_NEURITE_OUT_GROWTH	61	-0.304688	-1.13587	0.280919	0.516559	1	5635	tags=41%, list=27%, signal=56%
REACTOME_ADP_SIGNALLING_THROUGH_P2RY1	24	-0.340101	-1.13885	0.265748	0.517397	1	3621	tags=33%, list=18%, signal=40%
PID_ILK_PATHWAY	44	-0.430582	-1.13816	0.361842	0.517416	1	3518	tags=36%, list=17%, signal=44%
KEGG_PROXIMAL_TUBULE_BICARBONATE_RECLAMATION	23	-0.417494	-1.13458	0.315582	0.517622	1	4600	tags=52%, list=22%, signal=67%
REACTOME_SIGNALLING_TO_ERKS	34	-0.380982	-1.12259	0.352713	0.528727	1	3328	tags=35%, list=16%, signal=42%
REACTOME_INTERFERON_SIGNALING	143	-0.286647	-1.12304	0.289908	0.529123	1	3996	tags=29%, list=19%, signal=35%
REACTOME_REGULATION_OF_WATER_BALANCE_BY_RENAL_AQUAPORINS	42	-0.381328	-1.12337	0.28	0.529822	1	5979	tags=43%, list=29%, signal=60%
REACTOME_CGMP_EFFECTS	19	-0.401393	-1.12678	0.319149	0.530081	1	1858	tags=21%, list=9%, signal=23%
ST_JNK_MAPK_PATHWAY	38	-0.366083	-1.12367	0.339623	0.530582	1	5527	tags=47%, list=27%, signal=65%
BIOCARTA_AMI_PATHWAY	19	-0.526632	-1.11877	0.367188	0.530626	1	2140	tags=32%, list=10%, signal=35%
REACTOME_SIGNALING_BY_FGFR_MUTANTS	40	-0.283327	-1.1243	0.295858	0.530737	1	2029	tags=18%, list=10%, signal=19%
BIOCARTA_PAR1_PATHWAY	35	-0.311917	-1.12568	0.350598	0.530768	1	3949	tags=29%, list=19%, signal=35%
PID_NCADHERIN_PATHWAY	31	-0.417322	-1.127	0.41048	0.530995	1	7482	tags=65%, list=36%, signal=101%
PID_ERBB1_RECEPTOR_PROXIMAL_PATHWAY	35	-0.397137	-1.12472	0.362035	0.53128	1	5513	tags=40%, list=27%, signal=55%
REACTOME_TRIGLYCERIDE_BIOSYNTHESIS	31	-0.384487	-1.11885	0.355372	0.531785	1	1593	tags=23%, list=8%, signal=24%
REACTOME_LIPOPROTEIN_METABOLISM	27	-0.413105	-1.11939	0.334004	0.53199	1	1519	tags=22%, list=7%, signal=24%
REACTOME_NONSENSE_MEDIATED_DECAY_ENHANCED_BY_THE_EXON_JUNCTION_COMPLEX	96	-0.551974	-1.11983	0.4102	0.53252	1	6406	tags=77%, list=31%, signal=111%
PID_WNT_SIGNALING_PATHWAY	26	-0.403244	-1.11597	0.306931	0.534737	1	2712	tags=35%, list=13%, signal=40%
PID_ATM_PATHWAY	31	-0.321446	-1.11365	0.296501	0.53496	1	4032	tags=26%, list=20%, signal=32%
REACTOME_INNATE_IMMUNE_SYSTEM	225	-0.268776	-1.11284	0.302505	0.535133	1	5060	tags=34%, list=25%, signal=44%
KEGG_RIBOSOME	79	-0.572648	-1.11368	0.427938	0.536206	1	6406	tags=84%, list=31%, signal=121%
KEGG_NATURAL_KILLER_CELL_MEDIATED_CYTOTOXICITY	129	-0.284233	-1.11107	0.306911	0.537084	1	3674	tags=25%, list=18%, signal=30%
REACTOME_INFLUENZA_VIRAL_RNA_TRANSCRIPTION_AND_REPLICATION	93	-0.555768	-1.11386	0.417607	0.537248	1	6434	tags=74%, list=31%, signal=107%
REACTOME_PI3K_CASCADE	63	-0.249076	-1.1081	0.283554	0.541181	1	2602	tags=17%, list=13%, signal=20%
REACTOME_AQUAPORIN_MEDIATED_TRANSPORT	49	-0.287752	-1.1068	0.32265	0.542268	1	4231	tags=24%, list=21%, signal=31%
REACTOME_KERATAN_SULFATE_KERATIN_METABOLISM	29	-0.401562	-1.10577	0.371886	0.542846	1	5272	tags=41%, list=26%, signal=56%
PID_CD40_PATHWAY	30	-0.266354	-1.1034	0.317073	0.545892	1	3922	tags=23%, list=19%, signal=29%
BIOCARTA_FCER1_PATHWAY	37	-0.322676	-1.10247	0.30888	0.546335	1	5570	tags=49%, list=27%, signal=67%
REACTOME_SIGNAL_AMPLIFICATION	30	-0.319563	-1.09567	0.297349	0.554753	1	3621	tags=30%, list=18%, signal=36%
BIOCARTA_CDMAC_PATHWAY	15	-0.449892	-1.09595	0.37182	0.555563	1	3328	tags=40%, list=16%, signal=48%
PID_TCR_CALCIUM_PATHWAY	26	-0.316891	-1.09627	0.328185	0.556322	1	3587	tags=31%, list=17%, signal=37%
KEGG_NEUROTROPHIN_SIGNALING_PATHWAY	122	-0.288079	-1.09311	0.383838	0.55712	1	5937	tags=44%, list=29%, signal=62%
BIOCARTA_COMP_PATHWAY	16	-0.513194	-1.09234	0.397119	0.557357	1	4828	tags=44%, list=23%, signal=57%
PID_SHP2_PATHWAY	54	-0.290375	-1.09329	0.304029	0.558089	1	2331	tags=19%, list=11%, signal=21%
REACTOME_SIGNALLING_TO_RAS	25	-0.400871	-1.08948	0.385356	0.561413	1	5635	tags=56%, list=27%, signal=77%
REACTOME_SLC_MEDIATED_TRANSMEMBRANE_TRANSPORT	233	-0.252034	-1.08757	0.291585	0.563747	1	2626	tags=18%, list=13%, signal=20%
REACTOME_STRIATED_MUSCLE_CONTRACTION	27	-0.309314	-1.08441	0.334646	0.566985	1	4249	tags=30%, list=21%, signal=37%
BIOCARTA_EPO_PATHWAY	19	-0.350935	-1.08478	0.366603	0.567661	1	3650	tags=32%, list=18%, signal=38%
REACTOME_TCR_SIGNALING	48	-0.280686	-1.07847	0.33463	0.575328	1	2377	tags=19%, list=12%, signal=21%
PID_PRL_SIGNALING_EVENTS_PATHWAY	21	-0.403985	-1.07902	0.437367	0.575664	1	4373	tags=38%, list=21%, signal=48%
KEGG_HEDGEHOG_SIGNALING_PATHWAY	53	-0.304947	-1.0762	0.393258	0.57803	1	3436	tags=19%, list=17%, signal=23%
REACTOME_SIGNALING_BY_ERBB4	77	-0.26917	-1.07528	0.32833	0.578354	1	5635	tags=35%, list=27%, signal=48%
KEGG_LONG_TERM_POTENTIATION	68	-0.330763	-1.07317	0.417373	0.580987	1	5570	tags=41%, list=27%, signal=56%
REACTOME_SRP_DEPENDENT_COTRANSLATIONAL_PROTEIN_TARGETING_TO_MEMBRANE	99	-0.539735	-1.07177	0.488839	0.582227	1	6406	tags=74%, list=31%, signal=106%
NABA_ECM_GLYCOPROTEINS	169	-0.32793	-1.07038	0.374532	0.583513	1	2856	tags=25%, list=14%, signal=29%
REACTOME_NRAGE_SIGNALS_DEATH_THROUGH_JNK	42	-0.319021	-1.06655	0.426829	0.583979	1	3838	tags=36%, list=19%, signal=44%
KEGG_LEISHMANIA_INFECTION	62	-0.311329	-1.06937	0.354125	0.583987	1	3899	tags=31%, list=19%, signal=38%
REACTOME_IMMUNOREGULATORY_INTERACTIONS_BETWEEN_A_LYMPHOID_AND_A_NON_LYMPHOID_CELL	59	-0.355406	-1.06677	0.416016	0.584919	1	4014	tags=34%, list=19%, signal=42%
REACTOME_INSULIN_RECEPTOR_SIGNALLING_CASCADE	78	-0.251375	-1.06468	0.354898	0.586089	1	6206	tags=40%, list=30%, signal=57%
REACTOME_RIP_MEDIATED_NFKB_ACTIVATION_VIA_DAI	18	-0.37678	-1.06686	0.382536	0.58613	1	714	tags=17%, list=3%, signal=17%
REACTOME_PI3K_EVENTS_IN_ERBB2_SIGNALING	36	-0.288916	-1.06733	0.352941	0.586593	1	2029	tags=17%, list=10%, signal=18%
REACTOME_METABOLISM_OF_LIPIDS_AND_LIPOPROTEINS	400	-0.215152	-1.06202	0.320442	0.589434	1	3333	tags=18%, list=16%, signal=21%
REACTOME_SIGNALLING_BY_NGF	202	-0.320544	-1.0599	0.452632	0.591896	1	4281	tags=33%, list=21%, signal=41%
REACTOME_INTEGRATION_OF_ENERGY_METABOLISM	112	-0.277094	-1.05912	0.420705	0.591992	1	3120	tags=22%, list=15%, signal=26%
KEGG_FC_GAMMA_R_MEDIATED_PHAGOCYTOSIS	87	-0.270576	-1.05101	0.425743	0.5947	1	5394	tags=32%, list=26%, signal=43%
BIOCARTA_PPARA_PATHWAY	53	-0.297906	-1.05387	0.413926	0.594753	1	3599	tags=28%, list=17%, signal=34%
REACTOME_METABOLISM_OF_CARBOHYDRATES	215	-0.258876	-1.05443	0.392405	0.595029	1	3865	tags=24%, list=19%, signal=29%
REACTOME_SIGNALING_BY_SCF_KIT	67	-0.262775	-1.05121	0.380117	0.595665	1	5635	tags=33%, list=27%, signal=45%
PID_ERBB2_ERBB3_PATHWAY	43	-0.357253	-1.05629	0.425703	0.5958	1	4182	tags=33%, list=20%, signal=41%
REACTOME_IL1_SIGNALING	32	-0.31218	-1.05472	0.387037	0.595862	1	2509	tags=22%, list=12%, signal=25%
REACTOME_ACTIVATION_OF_CHAPERONE_GENES_BY_XBP1S	43	-0.314171	-1.05497	0.429142	0.596709	1	4756	tags=40%, list=23%, signal=51%
KEGG_T_CELL_RECEPTOR_SIGNALING_PATHWAY	107	-0.232252	-1.05202	0.334653	0.596746	1	3420	tags=21%, list=17%, signal=26%
REACTOME_CELL_DEATH_SIGNALLING_VIA_NRAGE_NRIF_AND_NADE	56	-0.338192	-1.05124	0.473461	0.596954	1	4281	tags=41%, list=21%, signal=52%
REACTOME_IL_3_5_AND_GM_CSF_SIGNALING	43	-0.261602	-1.04481	0.372277	0.604526	1	2441	tags=16%, list=12%, signal=18%
PID_P53_REGULATION_PATHWAY	55	-0.360749	-1.0383	0.487288	0.612255	1	2673	tags=24%, list=13%, signal=27%
PID_IL4_2PATHWAY	62	-0.287188	-1.03954	0.390385	0.612831	1	2749	tags=19%, list=13%, signal=22%
REACTOME_KERATAN_SULFATE_BIOSYNTHESIS	25	-0.403715	-1.0385	0.444846	0.613204	1	5272	tags=40%, list=26%, signal=54%
REACTOME_REGULATION_OF_INSULIN_SECRETION	85	-0.273848	-1.0343	0.42887	0.61567	1	3120	tags=24%, list=15%, signal=28%
REACTOME_SPHINGOLIPID_DE_NOVO_BIOSYNTHESIS	19	-0.367962	-1.03329	0.446721	0.616108	1	6040	tags=53%, list=29%, signal=74%
ST_ADRENERGIC	35	-0.266152	-1.0325	0.402214	0.616304	1	3374	tags=23%, list=16%, signal=27%
REACTOME_MEIOTIC_SYNAPSIS	60	-0.303803	-1.03466	0.405088	0.616385	1	6316	tags=40%, list=31%, signal=58%
REACTOME_GLUCAGON_SIGNALING_IN_METABOLIC_REGULATION	32	-0.370694	-1.03508	0.491726	0.616955	1	5979	tags=50%, list=29%, signal=70%
KEGG_TYPE_II_DIABETES_MELLITUS	44	-0.273217	-1.03062	0.416206	0.618429	1	5937	tags=41%, list=29%, signal=57%
REACTOME_SHC_RELATED_EVENTS	16	-0.413006	-1.02885	0.454724	0.620269	1	5635	tags=56%, list=27%, signal=77%
BIOCARTA_P38MAPK_PATHWAY	39	-0.309984	-1.0255	0.454724	0.62503	1	5423	tags=44%, list=26%, signal=59%
PID_ECADHERIN_NASCENT_AJ_PATHWAY	39	-0.377044	-1.0216	0.496894	0.630796	1	7272	tags=56%, list=35%, signal=87%
PID_RAC1_PATHWAY	50	-0.288444	-1.01652	0.481482	0.638736	1	4286	tags=24%, list=21%, signal=30%
BIOCARTA_MAL_PATHWAY	18	-0.379886	-1.01071	0.463265	0.645117	1	6176	tags=56%, list=30%, signal=79%
REACTOME_ENDOGENOUS_STEROLS	15	-0.415923	-1.01144	0.452055	0.645192	1	2822	tags=33%, list=14%, signal=39%
PID_RAS_PATHWAY	28	-0.287858	-1.01166	0.461224	0.646216	1	4825	tags=25%, list=23%, signal=33%
PID_P38_ALPHA_BETA_DOWNSTREAM_PATHWAY	37	-0.315862	-1.00372	0.50503	0.652822	1	3447	tags=30%, list=17%, signal=36%
PID_ENDOTHELIN_PATHWAY	62	-0.295232	-1.00469	0.439623	0.653772	1	5363	tags=44%, list=26%, signal=59%
KEGG_COMPLEMENT_AND_COAGULATION_CASCADES	66	-0.383977	-1.00228	0.495069	0.654129	1	1309	tags=18%, list=6%, signal=19%
REACTOME_PLATELET_SENSITIZATION_BY_LDL	16	-0.359876	-1.00374	0.461248	0.654192	1	174	tags=13%, list=1%, signal=13%
KEGG_FATTY_ACID_METABOLISM	39	-0.292848	-1.00496	0.463035	0.654644	1	4102	tags=33%, list=20%, signal=42%
BIOCARTA_MTOR_PATHWAY	21	-0.408887	-0.997156	0.540373	0.659215	1	7340	tags=57%, list=36%, signal=89%
REACTOME_NUCLEAR_EVENTS_KINASE_AND_TRANSCRIPTION_FACTOR_ACTIVATION	24	-0.321976	-0.99516	0.475379	0.660032	1	4215	tags=42%, list=20%, signal=52%
BIOCARTA_IL2RB_PATHWAY	38	-0.301237	-0.998246	0.463654	0.66012	1	3669	tags=26%, list=18%, signal=32%
PID_EPHB_FWD_PATHWAY	40	-0.338552	-0.99718	0.52449	0.660553	1	4225	tags=33%, list=21%, signal=41%
PID_TOLL_ENDOGENOUS_PATHWAY	23	-0.378072	-0.995262	0.444015	0.661209	1	4067	tags=35%, list=20%, signal=43%
REACTOME_SYNTHESIS_OF_PC	17	-0.316836	-0.991701	0.473469	0.662192	1	5485	tags=41%, list=27%, signal=56%
BIOCARTA_RAS_PATHWAY	22	-0.367499	-0.992318	0.495984	0.662389	1	5873	tags=50%, list=29%, signal=70%
PID_ERA_GENOMIC_PATHWAY	61	-0.264582	-0.992901	0.480315	0.662653	1	2720	tags=16%, list=13%, signal=19%
BIOCARTA_AKT_PATHWAY	19	-0.313645	-0.986183	0.494094	0.669226	1	714	tags=16%, list=3%, signal=16%
PID_P38_MKK3_6PATHWAY	23	-0.309023	-0.986385	0.501961	0.670276	1	4434	tags=35%, list=22%, signal=44%
BIOCARTA_SHH_PATHWAY	16	-0.34998	-0.979495	0.485149	0.670464	1	3436	tags=25%, list=17%, signal=30%
REACTOME_TRANSPORT_TO_THE_GOLGI_AND_SUBSEQUENT_MODIFICATION	32	-0.33972	-0.984726	0.479125	0.670583	1	5942	tags=44%, list=29%, signal=61%
PID_KIT_PATHWAY	49	-0.278825	-0.976188	0.530534	0.670691	1	2441	tags=20%, list=12%, signal=23%
BIOCARTA_EIF4_PATHWAY	22	-0.413575	-0.976942	0.573593	0.670748	1	6917	tags=59%, list=34%, signal=89%
REACTOME_SIGNALING_BY_FGFR1_MUTANTS	26	-0.255981	-0.982989	0.471173	0.67095	1	2796	tags=19%, list=14%, signal=22%
REACTOME_DIABETES_PATHWAYS	122	-0.255513	-0.983592	0.481113	0.671258	1	3929	tags=25%, list=19%, signal=31%
BIOCARTA_AT1R_PATHWAY	31	-0.387839	-0.979599	0.548057	0.67163	1	5570	tags=52%, list=27%, signal=71%
PID_REELIN_PATHWAY	29	-0.400255	-0.981808	0.532922	0.671758	1	4877	tags=45%, list=24%, signal=59%
SIG_IL4RECEPTOR_IN_B_LYPHOCYTES	27	-0.305582	-0.976959	0.515936	0.672084	1	7379	tags=67%, list=36%, signal=104%
REACTOME_SIGNALING_BY_FGFR	101	-0.240728	-0.980812	0.492248	0.672282	1	6273	tags=42%, list=30%, signal=59%
REACTOME_SIGNALING_BY_FGFR_IN_DISEASE	112	-0.240173	-0.97974	0.519841	0.672805	1	6273	tags=41%, list=30%, signal=59%
BIOCARTA_GCR_PATHWAY	19	-0.31443	-0.977165	0.477099	0.673064	1	6917	tags=63%, list=34%, signal=95%
REACTOME_IRON_UPTAKE_AND_TRANSPORT	33	-0.358114	-0.973173	0.52919	0.674539	1	1428	tags=18%, list=7%, signal=20%
BIOCARTA_IL17_PATHWAY	16	-0.394011	-0.967523	0.541752	0.679453	1	1791	tags=25%, list=9%, signal=27%
REACTOME_TRANSLATION	124	-0.476051	-0.968041	0.642369	0.679925	1	6406	tags=67%, list=31%, signal=97%
ST_WNT_BETA_CATENIN_PATHWAY	33	-0.281414	-0.969409	0.502924	0.6801	1	6750	tags=45%, list=33%, signal=67%
PID_DELTA_NP63_PATHWAY	46	-0.317066	-0.968542	0.521401	0.680322	1	1952	tags=17%, list=9%, signal=19%
BIOCARTA_FMLP_PATHWAY	34	-0.297444	-0.963861	0.509921	0.683167	1	5873	tags=41%, list=29%, signal=57%
REACTOME_INTRINSIC_PATHWAY	17	-0.350406	-0.963966	0.526971	0.684333	1	1309	tags=24%, list=6%, signal=25%
ST_GA12_PATHWAY	22	-0.25855	-0.96073	0.528958	0.687591	1	5570	tags=41%, list=27%, signal=56%
BIOCARTA_EDG1_PATHWAY	24	-0.302079	-0.958633	0.544534	0.689678	1	5410	tags=38%, list=26%, signal=51%
REACTOME_APOPTOSIS	135	-0.278561	-0.955949	0.554455	0.691686	1	4706	tags=31%, list=23%, signal=40%
KEGG_GLYCOSAMINOGLYCAN_DEGRADATION	21	-0.324259	-0.955991	0.522073	0.693004	1	5211	tags=33%, list=25%, signal=45%
PID_HIF1A_PATHWAY	18	-0.379317	-0.952307	0.565762	0.695324	1	5096	tags=44%, list=25%, signal=59%
PID_CXCR3_PATHWAY	40	-0.264716	-0.951401	0.541339	0.695481	1	6917	tags=55%, list=34%, signal=83%
PID_FOXO_PATHWAY	44	-0.388242	-0.950243	0.638889	0.696158	1	4586	tags=45%, list=22%, signal=58%
REACTOME_METAL_ION_SLC_TRANSPORTERS	22	-0.320262	-0.95239	0.513208	0.696561	1	2390	tags=18%, list=12%, signal=21%
BIOCARTA_NKT_PATHWAY	27	-0.417584	-0.94911	0.568138	0.696826	1	2973	tags=26%, list=14%, signal=30%
REACTOME_CTNNB1_PHOSPHORYLATION_CASCADE	16	-0.356095	-0.947139	0.552	0.698969	1	7340	tags=75%, list=36%, signal=116%
REACTOME_MEMBRANE_TRAFFICKING	116	-0.339612	-0.944375	0.612832	0.702453	1	5551	tags=39%, list=27%, signal=53%
REACTOME_RECYCLING_PATHWAY_OF_L1	25	-0.339717	-0.942118	0.561181	0.703576	1	3990	tags=28%, list=19%, signal=35%
REACTOME_G_ALPHA_Z_SIGNALLING_EVENTS	42	-0.319867	-0.942745	0.617849	0.703841	1	6007	tags=48%, list=29%, signal=67%
KEGG_CELL_CYCLE	113	-0.238126	-0.940361	0.562731	0.705238	1	2748	tags=20%, list=13%, signal=23%
KEGG_LYSOSOME	115	-0.254666	-0.938019	0.583004	0.70528	1	3988	tags=23%, list=19%, signal=29%
REACTOME_AMINO_ACID_SYNTHESIS_AND_INTERCONVERSION_TRANSAMINATION	16	-0.488228	-0.938443	0.651111	0.705866	1	1977	tags=31%, list=10%, signal=35%
REACTOME_DESTABILIZATION_OF_MRNA_BY_BRF1	16	-0.328388	-0.938955	0.516791	0.706351	1	796	tags=13%, list=4%, signal=13%
REACTOME_NUCLEOTIDE_BINDING_DOMAIN_LEUCINE_RICH_REPEAT_CONTAINING_RECEPTOR_NLR_SIGNALING_PATHWAYS	36	-0.271101	-0.93648	0.525896	0.706796	1	2406	tags=19%, list=12%, signal=22%
REACTOME_MAPK_TARGETS_NUCLEAR_EVENTS_MEDIATED_BY_MAP_KINASES	30	-0.319975	-0.935263	0.572816	0.707542	1	4215	tags=40%, list=20%, signal=50%
PID_IGF1_PATHWAY	30	-0.366367	-0.933817	0.585366	0.708643	1	7379	tags=63%, list=36%, signal=99%
BIOCARTA_RAC1_PATHWAY	23	-0.321806	-0.930407	0.611691	0.709117	1	2571	tags=22%, list=12%, signal=25%
KEGG_GALACTOSE_METABOLISM	25	-0.270559	-0.930699	0.56	0.709988	1	5116	tags=28%, list=25%, signal=37%
REACTOME_PHOSPHOLIPASE_C_MEDIATED_CASCADE	53	-0.225943	-0.931292	0.580224	0.710339	1	2654	tags=19%, list=13%, signal=22%
REACTOME_PI3K_AKT_ACTIVATION	29	-0.302618	-0.932002	0.582329	0.710468	1	7379	tags=52%, list=36%, signal=80%
SA_TRKA_RECEPTOR	16	-0.334391	-0.927966	0.555126	0.712	1	5299	tags=44%, list=26%, signal=59%
ST_GA13_PATHWAY	36	-0.243572	-0.926216	0.555556	0.713694	1	6994	tags=50%, list=34%, signal=76%
BIOCARTA_GPCR_PATHWAY	33	-0.337958	-0.924843	0.596774	0.714606	1	6273	tags=48%, list=30%, signal=70%
REACTOME_SPHINGOLIPID_METABOLISM	51	-0.234282	-0.918952	0.593156	0.717698	1	6099	tags=39%, list=30%, signal=56%
REACTOME_SIGNALING_BY_FGFR1_FUSION_MUTANTS	15	-0.348085	-0.919313	0.611452	0.71846	1	3716	tags=27%, list=18%, signal=33%
REACTOME_DOWNSTREAM_SIGNAL_TRANSDUCTION	84	-0.292072	-0.919392	0.646421	0.719678	1	5940	tags=38%, list=29%, signal=53%
ST_DIFFERENTIATION_PATHWAY_IN_PC12_CELLS	43	-0.256171	-0.91957	0.573413	0.720792	1	3328	tags=28%, list=16%, signal=33%
PID_GMCSF_PATHWAY	37	-0.265832	-0.920312	0.586142	0.720906	1	2331	tags=16%, list=11%, signal=18%
BIOCARTA_GATA3_PATHWAY	15	-0.306044	-0.915288	0.561753	0.721178	1	3420	tags=20%, list=17%, signal=24%
REACTOME_DOWNSTREAM_SIGNALING_OF_ACTIVATED_FGFR	90	-0.220451	-0.915991	0.593449	0.721262	1	5940	tags=38%, list=29%, signal=53%
BIOCARTA_TPO_PATHWAY	23	-0.311722	-0.912953	0.601578	0.723827	1	3259	tags=26%, list=16%, signal=31%
REACTOME_PIP3_ACTIVATES_AKT_SIGNALING	21	-0.253005	-0.911646	0.607692	0.724609	1	7192	tags=48%, list=35%, signal=73%
REACTOME_SYNTHESIS_OF_PIPS_AT_THE_PLASMA_MEMBRANE	23	-0.273854	-0.910752	0.573614	0.724693	1	7204	tags=52%, list=35%, signal=80%
REACTOME_SIGNALING_BY_ERBB2	90	-0.273514	-0.904455	0.613636	0.731344	1	5940	tags=42%, list=29%, signal=59%
REACTOME_MAP_KINASE_ACTIVATION_IN_TLR_CASCADE	42	-0.285886	-0.905257	0.59381	0.731345	1	4215	tags=38%, list=20%, signal=48%
REACTOME_GLYCEROPHOSPHOLIPID_BIOSYNTHESIS	67	-0.22683	-0.90541	0.59375	0.732479	1	4627	tags=27%, list=22%, signal=35%
REACTOME_PHOSPHOLIPID_METABOLISM	152	-0.210314	-0.902214	0.651303	0.733831	1	6099	tags=36%, list=30%, signal=50%
PID_IL2_1PATHWAY	54	-0.24603	-0.901382	0.610902	0.733867	1	3417	tags=20%, list=17%, signal=24%
REACTOME_GLYCOLYSIS	26	-0.337515	-0.900203	0.562863	0.734573	1	7340	tags=58%, list=36%, signal=90%
BIOCARTA_VEGF_PATHWAY	27	-0.288449	-0.897342	0.611111	0.736594	1	4360	tags=30%, list=21%, signal=38%
ST_MYOCYTE_AD_PATHWAY	26	-0.261189	-0.897987	0.589178	0.736842	1	3374	tags=27%, list=16%, signal=32%
KEGG_RENIN_ANGIOTENSIN_SYSTEM	16	-0.364829	-0.892764	0.584795	0.737433	1	949	tags=13%, list=5%, signal=13%
REACTOME_PKB_MEDIATED_EVENTS	23	-0.289483	-0.892981	0.619433	0.738444	1	5877	tags=35%, list=29%, signal=49%
PID_ANTHRAX_PATHWAY	15	-0.352446	-0.893658	0.597723	0.738529	1	4159	tags=40%, list=20%, signal=50%
PID_ERBB1_DOWNSTREAM_PATHWAY	101	-0.302854	-0.893842	0.617464	0.73964	1	5635	tags=39%, list=27%, signal=53%
BIOCARTA_PDGF_PATHWAY	31	-0.328218	-0.894675	0.619522	0.739654	1	3259	tags=32%, list=16%, signal=38%
KEGG_ANTIGEN_PROCESSING_AND_PRESENTATION	81	-0.225543	-0.889548	0.610568	0.741294	1	3889	tags=22%, list=19%, signal=27%
REACTOME_CELL_CELL_JUNCTION_ORGANIZATION	53	-0.246316	-0.888285	0.65725	0.742076	1	3185	tags=23%, list=15%, signal=27%
REACTOME_SYNTHESIS_OF_PA	22	-0.254695	-0.884384	0.680374	0.745949	1	631	tags=9%, list=3%, signal=9%
REACTOME_SIGNALING_BY_CONSTITUTIVELY_ACTIVE_EGFR	17	-0.387103	-0.884934	0.609023	0.746362	1	2441	tags=29%, list=12%, signal=33%
BIOCARTA_CCR3_PATHWAY	22	-0.305359	-0.881902	0.592593	0.748659	1	7482	tags=59%, list=36%, signal=93%
REACTOME_LYSOSOME_VESICLE_BIOGENESIS	22	-0.313545	-0.879395	0.618861	0.751438	1	2628	tags=18%, list=13%, signal=21%
PID_INTEGRIN2_PATHWAY	28	-0.334475	-0.876614	0.631048	0.753265	1	569	tags=11%, list=3%, signal=11%
REACTOME_G0_AND_EARLY_G1	19	-0.291865	-0.875422	0.654511	0.7539	1	3233	tags=21%, list=16%, signal=25%
REACTOME_ACTIVATION_OF_KAINATE_RECEPTORS_UPON_GLUTAMATE_BINDING	30	-0.250355	-0.874294	0.656126	0.754446	1	6993	tags=53%, list=34%, signal=81%
BIOCARTA_EGF_PATHWAY	30	-0.349884	-0.876649	0.641129	0.754557	1	3259	tags=33%, list=16%, signal=40%
REACTOME_DOWNSTREAM_TCR_SIGNALING	31	-0.257187	-0.873058	0.644914	0.755057	1	2377	tags=16%, list=12%, signal=18%
BIOCARTA_SPRY_PATHWAY	18	-0.340441	-0.871764	0.632411	0.755851	1	3328	tags=28%, list=16%, signal=33%
REACTOME_TRANS_GOLGI_NETWORK_VESICLE_BUDDING	56	-0.347431	-0.869341	0.715576	0.755894	1	5551	tags=39%, list=27%, signal=54%
SIG_INSULIN_RECEPTOR_PATHWAY_IN_CARDIAC_MYOCYTES	49	-0.255691	-0.870626	0.686992	0.756405	1	7379	tags=59%, list=36%, signal=92%
REACTOME_NA_CL_DEPENDENT_NEUROTRANSMITTER_TRANSPORTERS	17	-0.349966	-0.869494	0.674812	0.756957	1	773	tags=12%, list=4%, signal=12%
PID_NFAT_3PATHWAY	50	-0.306042	-0.866303	0.677632	0.759585	1	5635	tags=44%, list=27%, signal=60%
REACTOME_CHEMOKINE_RECEPTORS_BIND_CHEMOKINES	48	-0.373304	-0.863247	0.6826	0.760622	1	1727	tags=19%, list=8%, signal=20%
PID_TRKR_PATHWAY	59	-0.280328	-0.863656	0.635611	0.761346	1	3417	tags=27%, list=17%, signal=32%
REACTOME_SIGNAL_TRANSDUCTION_BY_L1	34	-0.308873	-0.863811	0.634615	0.762434	1	4637	tags=26%, list=23%, signal=34%
PID_ER_NONGENOMIC_PATHWAY	41	-0.234253	-0.857291	0.695481	0.76744	1	7420	tags=51%, list=36%, signal=80%
REACTOME_INFLUENZA_LIFE_CYCLE	127	-0.392127	-0.857759	0.722727	0.768118	1	6434	tags=61%, list=31%, signal=88%
KEGG_TOLL_LIKE_RECEPTOR_SIGNALING_PATHWAY	98	-0.21878	-0.852397	0.726916	0.773918	1	2406	tags=16%, list=12%, signal=18%
REACTOME_UNFOLDED_PROTEIN_RESPONSE	74	-0.236191	-0.849354	0.651163	0.776046	1	3888	tags=27%, list=19%, signal=33%
SIG_CD40PATHWAYMAP	33	-0.240132	-0.849898	0.650295	0.77654	1	5873	tags=39%, list=29%, signal=55%
KEGG_PPAR_SIGNALING_PATHWAY	66	-0.234408	-0.846706	0.675422	0.779086	1	2638	tags=20%, list=13%, signal=23%
REACTOME_G_ALPHA_I_SIGNALLING_EVENTS	165	-0.252588	-0.841449	0.760479	0.783312	1	1891	tags=13%, list=9%, signal=14%
BIOCARTA_IL3_PATHWAY	15	-0.288761	-0.841869	0.674286	0.783941	1	5570	tags=47%, list=27%, signal=64%
REACTOME_FORMATION_OF_FIBRIN_CLOT_CLOTTING_CASCADE	32	-0.315837	-0.84206	0.730315	0.785044	1	1309	tags=19%, list=6%, signal=20%
REACTOME_NOD1_2_SIGNALING_PATHWAY	24	-0.277694	-0.839228	0.651546	0.785366	1	2406	tags=21%, list=12%, signal=24%
PID_P38_MK2_PATHWAY	21	-0.334943	-0.838093	0.70217	0.785846	1	5635	tags=57%, list=27%, signal=79%
PID_IL2_STAT5_PATHWAY	30	-0.223848	-0.835904	0.681363	0.78672	1	2331	tags=13%, list=11%, signal=15%
REACTOME_TRAF6_MEDIATED_IRF7_ACTIVATION	28	-0.310662	-0.836015	0.715631	0.787891	1	2215	tags=18%, list=11%, signal=20%
PID_FOXM1_PATHWAY	39	-0.271212	-0.829873	0.722892	0.794805	1	2673	tags=26%, list=13%, signal=29%
REACTOME_GAB1_SIGNALOSOME	30	-0.248827	-0.827868	0.753372	0.796652	1	5567	tags=33%, list=27%, signal=46%
REACTOME_GROWTH_HORMONE_RECEPTOR_SIGNALING	24	-0.265113	-0.826634	0.668582	0.797182	1	6228	tags=38%, list=30%, signal=54%
REACTOME_GRB2_EVENTS_IN_ERBB2_SIGNALING	21	-0.284489	-0.824152	0.714286	0.798323	1	618	tags=14%, list=3%, signal=15%
BIOCARTA_NGF_PATHWAY	17	-0.304752	-0.82419	0.684211	0.799645	1	3259	tags=29%, list=16%, signal=35%
REACTOME_NGF_SIGNALLING_VIA_TRKA_FROM_THE_PLASMA_MEMBRANE	126	-0.259384	-0.821544	0.683438	0.801032	1	5940	tags=41%, list=29%, signal=58%
BIOCARTA_BARRESTIN_SRC_PATHWAY	15	-0.331098	-0.819712	0.656	0.802572	1	5864	tags=47%, list=28%, signal=65%
REACTOME_REGULATORY_RNA_PATHWAYS	24	-0.301609	-0.810768	0.730512	0.813777	1	5517	tags=29%, list=27%, signal=40%
KEGG_CYTOKINE_CYTOKINE_RECEPTOR_INTERACTION	245	-0.295361	-0.810825	0.730189	0.815054	1	2392	tags=19%, list=12%, signal=21%
REACTOME_OPIOID_SIGNALLING	76	-0.237351	-0.802097	0.741794	0.81715	1	6394	tags=46%, list=31%, signal=67%
REACTOME_PI_3K_CASCADE	48	-0.196193	-0.801118	0.761165	0.817172	1	2029	tags=13%, list=10%, signal=14%
KEGG_ARGININE_AND_PROLINE_METABOLISM	52	-0.266894	-0.80747	0.746781	0.817343	1	3867	tags=29%, list=19%, signal=35%
KEGG_NITROGEN_METABOLISM	23	-0.268811	-0.802646	0.807157	0.817695	1	2536	tags=22%, list=12%, signal=25%
SIG_PIP3_SIGNALING_IN_CARDIAC_MYOCTES	64	-0.228099	-0.802782	0.762846	0.818894	1	4586	tags=30%, list=22%, signal=38%
PID_AR_NONGENOMIC_PATHWAY	31	-0.297803	-0.798668	0.705521	0.819575	1	6993	tags=58%, list=34%, signal=88%
SIG_CHEMOTAXIS	45	-0.225279	-0.802811	0.719262	0.820245	1	7171	tags=53%, list=35%, signal=82%
BIOCARTA_ERK5_PATHWAY	17	-0.25367	-0.802871	0.722	0.821546	1	5202	tags=35%, list=25%, signal=47%
REACTOME_PROLONGED_ERK_ACTIVATION_EVENTS	17	-0.314074	-0.803298	0.687623	0.822267	1	5635	tags=41%, list=27%, signal=57%
KEGG_RIG_I_LIKE_RECEPTOR_SIGNALING_PATHWAY	65	-0.212104	-0.795714	0.791322	0.82264	1	2722	tags=15%, list=13%, signal=18%
REACTOME_CLASS_B_2_SECRETIN_FAMILY_RECEPTORS	81	-0.227787	-0.787314	0.840551	0.83355	1	3621	tags=23%, list=18%, signal=28%
PID_IL23_PATHWAY	36	-0.272918	-0.785515	0.755769	0.834866	1	1088	tags=17%, list=5%, signal=18%
REACTOME_SIGNALING_BY_EGFR_IN_CANCER	98	-0.252096	-0.781359	0.714868	0.839538	1	6273	tags=41%, list=30%, signal=58%
BIOCARTA_HCMV_PATHWAY	16	-0.282505	-0.777966	0.794661	0.843138	1	4159	tags=38%, list=20%, signal=47%
REACTOME_NEGATIVE_REGULATION_OF_FGFR_SIGNALING	36	-0.214356	-0.764227	0.832347	0.861645	1	4069	tags=25%, list=20%, signal=31%
REACTOME_SIGNALING_BY_INSULIN_RECEPTOR	98	-0.192891	-0.757883	0.806202	0.861966	1	3328	tags=17%, list=16%, signal=21%
PID_AURORA_A_PATHWAY	29	-0.246193	-0.762937	0.826804	0.862013	1	4546	tags=24%, list=22%, signal=31%
NABA_ECM_REGULATORS	216	-0.254524	-0.758017	0.800781	0.863193	1	2469	tags=15%, list=12%, signal=17%
KEGG_MATURITY_ONSET_DIABETES_OF_THE_YOUNG	19	-0.32243	-0.761095	0.812253	0.863245	1	904	tags=16%, list=4%, signal=16%
BIOCARTA_BIOPEPTIDES_PATHWAY	41	-0.273093	-0.758203	0.730769	0.86433	1	3328	tags=27%, list=16%, signal=32%
KEGG_SPHINGOLIPID_METABOLISM	30	-0.212312	-0.759175	0.817491	0.864422	1	5410	tags=33%, list=26%, signal=45%
PID_MTOR_4PATHWAY	62	-0.26224	-0.750734	0.751037	0.870482	1	5716	tags=40%, list=28%, signal=56%
BIOCARTA_LAIR_PATHWAY	16	-0.35438	-0.746404	0.781746	0.873388	1	1727	tags=19%, list=8%, signal=20%
PID_BARD1_PATHWAY	29	-0.260091	-0.746926	0.775758	0.874198	1	4032	tags=31%, list=20%, signal=39%
REACTOME_DEGRADATION_OF_THE_EXTRACELLULAR_MATRIX	27	-0.272193	-0.744164	0.78501	0.875159	1	2254	tags=11%, list=11%, signal=12%
KEGG_ALDOSTERONE_REGULATED_SODIUM_REABSORPTION	40	-0.208325	-0.742642	0.882576	0.875885	1	6217	tags=43%, list=30%, signal=61%
REACTOME_TGF_BETA_RECEPTOR_SIGNALING_ACTIVATES_SMADS	23	-0.267217	-0.740323	0.77451	0.877717	1	7329	tags=61%, list=36%, signal=94%
REACTOME_SHC_MEDIATED_CASCADE	28	-0.247994	-0.738817	0.815631	0.878452	1	2331	tags=18%, list=11%, signal=20%
REACTOME_DOWNREGULATION_OF_TGF_BETA_RECEPTOR_SIGNALING	20	-0.292922	-0.736501	0.793173	0.88011	1	5890	tags=50%, list=29%, signal=70%
REACTOME_GOLGI_ASSOCIATED_VESICLE_BIOGENESIS	49	-0.298054	-0.730849	0.771111	0.886185	1	5551	tags=37%, list=27%, signal=50%
PID_ARF6_DOWNSTREAM_PATHWAY	15	-0.272337	-0.726852	0.778689	0.888472	1	3417	tags=20%, list=17%, signal=24%
BIOCARTA_GH_PATHWAY	26	-0.209192	-0.727634	0.889693	0.8889	1	3650	tags=23%, list=18%, signal=28%
REACTOME_COSTIMULATION_BY_THE_CD28_FAMILY	57	-0.153761	-0.721097	0.896749	0.894382	1	5770	tags=26%, list=28%, signal=36%
REACTOME_MEIOSIS	96	-0.210928	-0.716103	0.92233	0.899238	1	5266	tags=29%, list=26%, signal=39%
BIOCARTA_PYK2_PATHWAY	26	-0.306843	-0.714351	0.724551	0.900058	1	5570	tags=46%, list=27%, signal=63%
ST_G_ALPHA_S_PATHWAY	16	-0.233042	-0.705974	0.860902	0.904509	1	3328	tags=19%, list=16%, signal=22%
KEGG_ONE_CARBON_POOL_BY_FOLATE	16	-0.269286	-0.7042	0.818182	0.90524	1	1594	tags=19%, list=8%, signal=20%
BIOCARTA_INSULIN_PATHWAY	22	-0.233127	-0.706395	0.868821	0.905448	1	3259	tags=23%, list=16%, signal=27%
PID_HDAC_CLASSII_PATHWAY	32	-0.301315	-0.707117	0.836028	0.90595	1	6994	tags=50%, list=34%, signal=76%
REACTOME_IL_2_SIGNALING	40	-0.174787	-0.708265	0.921348	0.906049	1	5635	tags=33%, list=27%, signal=45%
BIOCARTA_VIP_PATHWAY	26	-0.258269	-0.6981	0.865125	0.911055	1	1047	tags=12%, list=5%, signal=12%
REACTOME_REGULATION_OF_BETA_CELL_DEVELOPMENT	22	-0.273153	-0.696268	0.887129	0.911642	1	904	tags=14%, list=4%, signal=14%
PID_MYC_PATHWAY	23	-0.255163	-0.693976	0.82495	0.912852	1	6675	tags=52%, list=32%, signal=77%
BIOCARTA_TALL1_PATHWAY	15	-0.223211	-0.688749	0.858586	0.914239	1	6015	tags=40%, list=29%, signal=56%
PID_P75_NTR_PATHWAY	64	-0.188979	-0.690107	0.907115	0.91426	1	3921	tags=23%, list=19%, signal=29%
REACTOME_MICRORNA_MIRNA_BIOGENESIS	21	-0.264306	-0.690342	0.818182	0.915427	1	5025	tags=24%, list=24%, signal=31%
BIOCARTA_IGF1_PATHWAY	21	-0.246764	-0.683542	0.834615	0.918735	1	3259	tags=24%, list=16%, signal=28%
REACTOME_ADAPTIVE_IMMUNE_SYSTEM	474	-0.153393	-0.681357	0.950397	0.919642	1	4014	tags=19%, list=19%, signal=23%
KEGG_PRIMARY_IMMUNODEFICIENCY	35	-0.240925	-0.676395	0.833656	0.923285	1	614	tags=9%, list=3%, signal=9%
KEGG_BETA_ALANINE_METABOLISM	22	-0.246579	-0.674595	0.926978	0.923714	1	3867	tags=27%, list=19%, signal=34%
PID_ARF_3PATHWAY	16	-0.237666	-0.67118	0.809816	0.924289	1	607	tags=6%, list=3%, signal=6%
REACTOME_ARMS_MEDIATED_ACTIVATION	15	-0.279129	-0.671525	0.833984	0.92541	1	5635	tags=40%, list=27%, signal=55%
KEGG_JAK_STAT_SIGNALING_PATHWAY	151	-0.192312	-0.66776	0.962687	0.926275	1	3058	tags=17%, list=15%, signal=20%
SIG_REGULATION_OF_THE_ACTIN_CYTOSKELETON_BY_RHO_GTPASES	35	-0.180736	-0.664573	0.872255	0.928215	1	7599	tags=43%, list=37%, signal=68%
PID_LIS1_PATHWAY	27	-0.319466	-0.660799	0.813417	0.930589	1	4877	tags=41%, list=24%, signal=53%
KEGG_SYSTEMIC_LUPUS_ERYTHEMATOSUS	107	-0.201719	-0.655676	0.946154	0.931036	1	3574	tags=19%, list=17%, signal=22%
REACTOME_REGULATION_OF_GENE_EXPRESSION_IN_BETA_CELLS	16	-0.260263	-0.644488	0.928713	0.931532	1	904	tags=13%, list=4%, signal=13%
REACTOME_TRANSMISSION_ACROSS_CHEMICAL_SYNAPSES	180	-0.198828	-0.655757	0.873016	0.93241	1	3034	tags=18%, list=15%, signal=21%
PID_ERBB1_INTERNALIZATION_PATHWAY	40	-0.254849	-0.645038	0.808642	0.93246	1	4225	tags=23%, list=21%, signal=28%
REACTOME_TRANSPORT_OF_VITAMINS_NUCLEOSIDES_AND_RELATED_MOLECULES	31	-0.219949	-0.647634	0.948515	0.932909	1	2023	tags=19%, list=10%, signal=21%
BIOCARTA_INFLAM_PATHWAY	29	-0.26434	-0.651918	0.887405	0.933173	1	2392	tags=21%, list=12%, signal=23%
REACTOME_BRANCHED_CHAIN_AMINO_ACID_CATABOLISM	16	-0.285507	-0.656482	0.847525	0.933198	1	2933	tags=31%, list=14%, signal=36%
KEGG_STEROID_HORMONE_BIOSYNTHESIS	45	-0.226197	-0.650253	0.957198	0.933333	1	2568	tags=16%, list=12%, signal=18%
BIOCARTA_STEM_PATHWAY	15	-0.288797	-0.640501	0.900204	0.933644	1	2064	tags=20%, list=10%, signal=22%
REACTOME_L1CAM_INTERACTIONS	79	-0.19953	-0.645087	0.847599	0.933844	1	4776	tags=25%, list=23%, signal=33%
KEGG_VIBRIO_CHOLERAE_INFECTION	50	-0.217532	-0.648155	0.87	0.933884	1	1769	tags=12%, list=9%, signal=13%
REACTOME_GABA_SYNTHESIS_RELEASE_REUPTAKE_AND_DEGRADATION	17	-0.328488	-0.635049	0.85336	0.934127	1	773	tags=12%, list=4%, signal=12%
REACTOME_IL_RECEPTOR_SHC_SIGNALING	27	-0.177989	-0.636647	0.969582	0.934161	1	2377	tags=15%, list=12%, signal=17%
REACTOME_CREB_PHOSPHORYLATION_THROUGH_THE_ACTIVATION_OF_RAS	27	-0.206125	-0.632873	0.912176	0.93461	1	2173	tags=15%, list=11%, signal=17%
REACTOME_METABOLISM_OF_MRNA	195	-0.265913	-0.636987	0.828694	0.935274	1	6406	tags=51%, list=31%, signal=74%
REACTOME_DAG_AND_IP3_SIGNALING	31	-0.227309	-0.62743	0.899344	0.937844	1	2654	tags=19%, list=13%, signal=22%
REACTOME_NEUROTRANSMITTER_RELEASE_CYCLE	34	-0.267252	-0.620305	0.882716	0.939456	1	3034	tags=21%, list=15%, signal=24%
BIOCARTA_IL2_PATHWAY	22	-0.184036	-0.622024	0.928571	0.939509	1	5570	tags=32%, list=27%, signal=44%
REACTOME_REGULATION_OF_INSULIN_LIKE_GROWTH_FACTOR_IGF_ACTIVITY_BY_INSULIN_LIKE_GROWTH_FACTOR_BINDING_PROTEINS_IGFBPS	16	-0.275469	-0.622284	0.898039	0.940724	1	150	tags=6%, list=1%, signal=6%
REACTOME_POST_NMDA_RECEPTOR_ACTIVATION_EVENTS	33	-0.210169	-0.610406	0.908	0.942892	1	2173	tags=15%, list=11%, signal=17%
REACTOME_PI_METABOLISM	35	-0.180457	-0.610586	0.93666	0.944162	1	7204	tags=43%, list=35%, signal=66%
KEGG_INTESTINAL_IMMUNE_NETWORK_FOR_IGA_PRODUCTION	45	-0.216616	-0.610707	0.937132	0.945484	1	6	tags=2%, list=0%, signal=2%
BIOCARTA_NOS1_PATHWAY	20	-0.218954	-0.602337	0.892713	0.94725	1	6484	tags=40%, list=31%, signal=58%
REACTOME_GLUCOSE_METABOLISM	63	-0.205194	-0.598503	0.905242	0.948398	1	7078	tags=43%, list=34%, signal=65%
KEGG_GRAFT_VERSUS_HOST_DISEASE	37	-0.209513	-0.594585	0.914513	0.949606	1	4962	tags=30%, list=24%, signal=39%
PID_PI3KCI_AKT_PATHWAY	30	-0.233862	-0.588354	0.856275	0.952431	1	7477	tags=63%, list=36%, signal=99%
BIOCARTA_IGF1MTOR_PATHWAY	19	-0.209861	-0.584952	0.89901	0.953334	1	7340	tags=47%, list=36%, signal=74%
KEGG_SELENOAMINO_ACID_METABOLISM	21	-0.194986	-0.57949	0.939571	0.953857	1	3449	tags=24%, list=17%, signal=29%
REACTOME_PKA_MEDIATED_PHOSPHORYLATION_OF_CREB	17	-0.223685	-0.580825	0.935205	0.954516	1	5940	tags=41%, list=29%, signal=58%
REACTOME_PREFOLDIN_MEDIATED_TRANSFER_OF_SUBSTRATE_TO_CCT_TRIC	20	-0.286723	-0.572454	0.872845	0.956655	1	1187	tags=10%, list=6%, signal=11%
REACTOME_EICOSANOID_LIGAND_BINDING_RECEPTORS	15	-0.267132	-0.569794	0.980916	0.956697	1	4289	tags=27%, list=21%, signal=34%
REACTOME_MRNA_3_END_PROCESSING	23	-0.212058	-0.566638	0.905622	0.957159	1	3979	tags=22%, list=19%, signal=27%
REACTOME_AMYLOIDS	66	-0.183047	-0.548694	0.996071	0.963607	1	2798	tags=15%, list=14%, signal=17%
PID_MYC_ACTIV_PATHWAY	75	-0.172943	-0.545449	0.980119	0.96377	1	6435	tags=39%, list=31%, signal=56%
KEGG_HEMATOPOIETIC_CELL_LINEAGE	83	-0.196626	-0.550703	0.976562	0.964048	1	2216	tags=11%, list=11%, signal=12%
REACTOME_RNA_POL_I_PROMOTER_OPENING	47	-0.1827	-0.504744	0.994118	0.9774	1	3322	tags=17%, list=16%, signal=20%
BIOCARTA_NFAT_PATHWAY	53	-0.140396	-0.505606	0.996109	0.978565	1	6917	tags=36%, list=34%, signal=54%
BIOCARTA_CREB_PATHWAY	26	-0.19464	-0.480106	0.934694	0.981652	1	8203	tags=54%, list=40%, signal=89%
REACTOME_METABOLISM_OF_RNA	235	-0.191018	-0.481271	0.914405	0.982814	1	4777	tags=33%, list=23%, signal=42%
