# Supplementary material for: The Pathway Coexpression Network: Revealing pathway relationships
Source: PLoS Comput Biol. 2018 Mar 19;14(3):e1006042. doi: 10.1371/journal.pcbi.1006042 (PMC5875878; doi:10.1371/journal.pcbi.1006042)
Supplement: S9 Table — (XLSX) [file pcbi.1006042.s012.xlsx]

## Sheet: Sheet1
GSM	Cell Type	Ethnicity	Disease State	Sex	Age
GSM119666	layer III neurons	Caucasian	normal	male	79
GSM119667	layer III neurons	Caucasian	normal	female	88
GSM119668	layer III neurons	Caucasian	normal	female	82
GSM119669	layer III neurons	Caucasian	normal	female	73
GSM119670	layer III neurons	Caucasian	normal	female	102
GSM119671	layer III neurons	Caucasian	normal	male	63
GSM119672	layer III neurons	Caucasian	normal	male	79
GSM119673	layer III neurons	Caucasian	normal	male	76
GSM119674	layer III neurons	Caucasian	normal	male	83
GSM119675	layer III neurons	Caucasian	normal	male	69
GSM119676	layer III neurons	Caucasian	normal	male	78
GSM238842	pyramidal neuron	unknown	Alzheimer’s	female	73
GSM238843	pyramidal neuron	unknown	Alzheimer’s	male	81
GSM238844	pyramidal neuron	unknown	Alzheimer’s	male	72
GSM238845	pyramidal neuron	unknown	Alzheimer’s	male	75
GSM238846	pyramidal neuron	unknown	Alzheimer’s	male	78
GSM238847	pyramidal neuron	unknown	Alzheimer’s	male	75
GSM238848	pyramidal neuron	unknown	Alzheimer’s	male	87
GSM238851	pyramidal neuron	unknown	Alzheimer’s	female	95
GSM238854	pyramidal neuron	unknown	Alzheimer’s	male	68
GSM238855	pyramidal neuron	unknown	Alzheimer’s	female	95
GSM238856	pyramidal neuron	unknown	Alzheimer’s	female	70.8
GSM238857	pyramidal neuron	unknown	Alzheimer’s	female	85
GSM238858	pyramidal neuron	unknown	Alzheimer’s	female	83
GSM238860	pyramidal neuron	unknown	Alzheimer’s	female	77
GSM238861	pyramidal neuron	unknown	Alzheimer’s	female	83
GSM238862	pyramidal neuron	unknown	Alzheimer’s	male	68
GSM238863	pyramidal neuron	unknown	Alzheimer’s	male	79
GSM238864	pyramidal neuron	unknown	Alzheimer’s	female	82
GSM238865	pyramidal neuron	unknown	Alzheimer’s	male	80
GSM238867	pyramidal neuron	unknown	Alzheimer’s	male	88
GSM238868	pyramidal neuron	unknown	Alzheimer’s	male	74
GSM238870	pyramidal neuron	unknown	Alzheimer’s	male	72
GSM238871	layer III neurons	Caucasian	Alzheimer’s	female	80
