# Supplementary material for: The Pathway Coexpression Network: Revealing pathway relationships
Source: PLoS Comput Biol. 2018 Mar 19;14(3):e1006042. doi: 10.1371/journal.pcbi.1006042 (PMC5875878; doi:10.1371/journal.pcbi.1006042)
Supplement: S10 Table — (XLSX) [file pcbi.1006042.s013.xlsx]

## Sheet: GSEA Enriched (Correlations)
Pathway.A	Pathway.B	Overlap.Coefficient	PathCor	p.value	p.Adjust
REACTOME_A_TETRASACCHARIDE_LINKER_SEQUENCE_IS_REQUIRED_FOR_GAG_SYNTHESIS	KEGG_FOCAL_ADHESION	0	0.474959	8.67949e-95	4.77164e-92
REACTOME_YAP1_AND_WWTR1_TAZ_STIMULATED_GENE_EXPRESSION	KEGG_DORSO_VENTRAL_AXIS_FORMATION	0	0.391937	3.25813e-26	2.00029e-24
PID_ANGIOPOIETIN_RECEPTOR_PATHWAY	KEGG_FOCAL_ADHESION	0.36	0.291309	5.51013e-28	3.64943e-26
REACTOME_YAP1_AND_WWTR1_TAZ_STIMULATED_GENE_EXPRESSION	PID_SMAD2_3NUCLEAR_PATHWAY	0.208333	0.286686	3.81449e-12	1.13759e-10
KEGG_FOCAL_ADHESION	KEGG_DORSO_VENTRAL_AXIS_FORMATION	0.304348	0.268187	1.96949e-13	6.33878e-12
PID_SMAD2_3NUCLEAR_PATHWAY	KEGG_FOCAL_ADHESION	0.0609756	0.249031	2.76477e-16	1.04673e-14
REACTOME_YAP1_AND_WWTR1_TAZ_STIMULATED_GENE_EXPRESSION	KEGG_NOTCH_SIGNALING_PATHWAY	0.0833333	0.233705	2.76382e-08	6.3827e-07
PID_ANGIOPOIETIN_RECEPTOR_PATHWAY	PID_SMAD2_3NUCLEAR_PATHWAY	0.06	0.230187	0.000113317	0.00193783
PID_ANGIOPOIETIN_RECEPTOR_PATHWAY	KEGG_DORSO_VENTRAL_AXIS_FORMATION	0.173913	0.224617	0.000360799	0.00586704
REACTOME_YAP1_AND_WWTR1_TAZ_STIMULATED_GENE_EXPRESSION	PID_RB_1PATHWAY	0.0833333	0.219487	1.81247e-05	0.000333564
PID_RB_1PATHWAY	PID_SMAD2_3NUCLEAR_PATHWAY	0.265625	0.21775	2.39612e-12	7.23369e-11
KEGG_NOTCH_SIGNALING_PATHWAY	KEGG_DORSO_VENTRAL_AXIS_FORMATION	0.173913	0.200895	2.97337e-11	8.38439e-10
PID_PS1_PATHWAY	PID_SMAD2_3NUCLEAR_PATHWAY	0.130435	0.199124	4.71714e-07	9.90113e-06
PID_PS1_PATHWAY	KEGG_NOTCH_SIGNALING_PATHWAY	0.26087	0.164218	1.595e-06	3.20643e-05

## Sheet: Correlated with GSEA Enriched
Pathway.A	Pathway.B	Overlap.Coefficient	PathCor	p.value	p.Adjust
NABA_ECM_AFFILIATED	NABA_ECM_REGULATORS	0	0.627722	2.66465e-251	5.75249e-247
REACTOME_CHONDROITIN_SULFATE_DERMATAN_SULFATE_METABOLISM	KEGG_FOCAL_ADHESION	0	0.514199	2.77193e-103	1.88874e-100
REACTOME_GLYCOSAMINOGLYCAN_METABOLISM	KEGG_FOCAL_ADHESION	0	0.499397	7.27211e-97	4.22352e-94
REACTOME_A_TETRASACCHARIDE_LINKER_SEQUENCE_IS_REQUIRED_FOR_GAG_SYNTHESIS	KEGG_FOCAL_ADHESION	0	0.474959	8.67949e-95	4.77164e-92
NABA_ECM_AFFILIATED	REACTOME_EXTRACELLULAR_MATRIX_ORGANIZATION	0	0.474662	1.3974e-86	6.13451e-84
NABA_ECM_AFFILIATED	PID_INTEGRIN2_PATHWAY	0	0.463008	5.14209e-56	9.46618e-54
REACTOME_CHONDROITIN_SULFATE_DERMATAN_SULFATE_METABOLISM	REACTOME_COLLAGEN_FORMATION	0	0.453848	2.51888e-51	4.00162e-49
REACTOME_A_TETRASACCHARIDE_LINKER_SEQUENCE_IS_REQUIRED_FOR_GAG_SYNTHESIS	REACTOME_EXTRACELLULAR_MATRIX_ORGANIZATION	0	0.452502	2.14919e-47	2.98678e-45
REACTOME_CS_DS_DEGRADATION	REACTOME_EXTRACELLULAR_MATRIX_ORGANIZATION	0	0.449297	2.49865e-68	6.61164e-66
REACTOME_CHONDROITIN_SULFATE_DERMATAN_SULFATE_METABOLISM	REACTOME_EXTRACELLULAR_MATRIX_ORGANIZATION	0	0.447142	5.96246e-37	5.67812e-35
REACTOME_GLYCOSAMINOGLYCAN_METABOLISM	REACTOME_COLLAGEN_FORMATION	0	0.442698	4.92263e-54	8.56348e-52
REACTOME_CS_DS_DEGRADATION	KEGG_FOCAL_ADHESION	0	0.442317	9.21427e-57	1.74044e-54
REACTOME_CHONDROITIN_SULFATE_BIOSYNTHESIS	KEGG_FOCAL_ADHESION	0	0.438609	5.26563e-66	1.30442e-63
REACTOME_GLYCOSAMINOGLYCAN_METABOLISM	REACTOME_EXTRACELLULAR_MATRIX_ORGANIZATION	0	0.437964	1.96365e-38	1.97394e-36
REACTOME_HS_GAG_DEGRADATION	KEGG_FOCAL_ADHESION	0	0.436419	3.94433e-45	5.07072e-43
NABA_ECM_AFFILIATED	KEGG_FOCAL_ADHESION	0	0.435357	1.54233e-45	2.01081e-43
REACTOME_A_TETRASACCHARIDE_LINKER_SEQUENCE_IS_REQUIRED_FOR_GAG_SYNTHESIS	REACTOME_COLLAGEN_FORMATION	0	0.433102	5.96829e-40	6.33104e-38
NABA_ECM_REGULATORS	KEGG_FOCAL_ADHESION	0	0.429425	1.5491e-27	1.00663e-25
PID_INTEGRIN2_PATHWAY	KEGG_FOCAL_ADHESION	0	0.427459	1.49797e-45	1.95413e-43
REACTOME_GLYCOSAMINOGLYCAN_METABOLISM	PID_INTEGRIN2_PATHWAY	0	0.420018	1.17521e-33	9.82618e-32
REACTOME_CHONDROITIN_SULFATE_BIOSYNTHESIS	PID_INTEGRIN2_PATHWAY	0	0.413367	1.94631e-36	1.81758e-34
REACTOME_HS_GAG_DEGRADATION	REACTOME_EXTRACELLULAR_MATRIX_ORGANIZATION	0	0.41293	7.33501e-26	4.43223e-24
NABA_ECM_REGULATORS	PID_INTEGRIN2_PATHWAY	0.137931	0.412655	5.50679e-81	2.08208e-78
REACTOME_CHONDROITIN_SULFATE_DERMATAN_SULFATE_METABOLISM	PID_INTEGRIN2_PATHWAY	0	0.398946	5.05909e-25	2.94229e-23
REACTOME_CS_DS_DEGRADATION	REACTOME_COLLAGEN_FORMATION	0	0.397022	3.02996e-35	2.69398e-33
REACTOME_EXTRACELLULAR_MATRIX_ORGANIZATION	PID_INTEGRIN2_PATHWAY	0	0.395163	9.61796e-26	5.78054e-24
REACTOME_YAP1_AND_WWTR1_TAZ_STIMULATED_GENE_EXPRESSION	KEGG_DORSO_VENTRAL_AXIS_FORMATION	0	0.391937	3.25813e-26	2.00029e-24
REACTOME_CHONDROITIN_SULFATE_BIOSYNTHESIS	REACTOME_COLLAGEN_FORMATION	0	0.387195	3.56e-10	9.35795e-09
REACTOME_CHONDROITIN_SULFATE_BIOSYNTHESIS	REACTOME_EXTRACELLULAR_MATRIX_ORGANIZATION	0	0.381602	1.64209e-12	5.01239e-11
PID_INTEGRIN2_PATHWAY	PID_ANGIOPOIETIN_RECEPTOR_PATHWAY	0	0.378113	3.79578e-42	4.36438e-40
REACTOME_EXTRACELLULAR_MATRIX_ORGANIZATION	KEGG_FOCAL_ADHESION	0.183908	0.375681	1.99282e-63	4.56962e-61
REACTOME_HS_GAG_DEGRADATION	REACTOME_COLLAGEN_FORMATION	0	0.367906	6.19337e-21	2.97345e-19
NABA_ECM_REGULATORS	REACTOME_CS_DS_DEGRADATION	0.0833333	0.365551	1.01498e-30	7.54495e-29
NABA_ECM_AFFILIATED	REACTOME_CS_DS_DEGRADATION	0.0833333	0.359388	1.82472e-48	2.63086e-46
REACTOME_COLLAGEN_FORMATION	KEGG_FOCAL_ADHESION	0.275862	0.348125	3.88119e-57	7.42287e-55
REACTOME_CS_DS_DEGRADATION	PID_INTEGRIN2_PATHWAY	0	0.346123	9.99783e-06	0.000188157
NABA_ECM_AFFILIATED	REACTOME_COLLAGEN_FORMATION	0	0.345602	2.16684e-23	1.16725e-21
REACTOME_CHONDROITIN_SULFATE_DERMATAN_SULFATE_METABOLISM	PID_ANGIOPOIETIN_RECEPTOR_PATHWAY	0	0.342648	0.00195355	0.029314
REACTOME_CHONDROITIN_SULFATE_BIOSYNTHESIS	PID_ANGIOPOIETIN_RECEPTOR_PATHWAY	0	0.332526	5.00957e-13	1.57672e-11
REACTOME_CS_DS_DEGRADATION	REACTOME_HS_GAG_DEGRADATION	0.166667	0.330769	3.21486e-30	2.34045e-28
REACTOME_COLLAGEN_FORMATION	PID_INTEGRIN2_PATHWAY	0	0.320974	0.000514916	0.00823325
NABA_ECM_REGULATORS	REACTOME_A_TETRASACCHARIDE_LINKER_SEQUENCE_IS_REQUIRED_FOR_GAG_SYNTHESIS	0	0.318088	0.0031511	0.0460762
NABA_ECM_AFFILIATED	REACTOME_HS_GAG_DEGRADATION	0.5	0.306408	8.97969e-29	6.13513e-27
PID_ANGIOPOIETIN_RECEPTOR_PATHWAY	KEGG_FOCAL_ADHESION	0.36	0.291309	5.51013e-28	3.64943e-26
NABA_ECM_AFFILIATED	PID_ANGIOPOIETIN_RECEPTOR_PATHWAY	0	0.290601	2.56517e-13	8.20465e-12
REACTOME_YAP1_AND_WWTR1_TAZ_STIMULATED_GENE_EXPRESSION	PID_SMAD2_3NUCLEAR_PATHWAY	0.208333	0.286686	3.81449e-12	1.13759e-10
NABA_ECM_REGULATORS	REACTOME_HS_GAG_DEGRADATION	0.1	0.280389	0.000169829	0.00285526
NABA_ECM_REGULATORS	REACTOME_EXTRACELLULAR_MATRIX_ORGANIZATION	0.390805	0.276984	2.44233e-30	1.7848e-28
NABA_ECM_REGULATORS	REACTOME_GLYCOSAMINOGLYCAN_METABOLISM	0.037037	0.276954	1.49426e-19	6.70211e-18
KEGG_FOCAL_ADHESION	KEGG_DORSO_VENTRAL_AXIS_FORMATION	0.304348	0.268187	1.96949e-13	6.33878e-12
NABA_ECM_AFFILIATED	REACTOME_A_TETRASACCHARIDE_LINKER_SEQUENCE_IS_REQUIRED_FOR_GAG_SYNTHESIS	0.44	0.260442	9.2083e-23	4.82101e-21
PID_SMAD2_3NUCLEAR_PATHWAY	KEGG_FOCAL_ADHESION	0.0609756	0.249031	2.76477e-16	1.04673e-14
NABA_ECM_AFFILIATED	REACTOME_GLYCOSAMINOGLYCAN_METABOLISM	0.101852	0.247327	2.11673e-13	6.7993e-12
REACTOME_CHONDROITIN_SULFATE_DERMATAN_SULFATE_METABOLISM	REACTOME_HS_GAG_DEGRADATION	0.7	0.243946	5.82897e-20	2.6681e-18
NABA_ECM_AFFILIATED	REACTOME_CHONDROITIN_SULFATE_DERMATAN_SULFATE_METABOLISM	0.234043	0.237787	7.56884e-17	2.96062e-15
REACTOME_EXTRACELLULAR_MATRIX_ORGANIZATION	PID_ANGIOPOIETIN_RECEPTOR_PATHWAY	0.04	0.235706	1.78912e-09	4.48516e-08
REACTOME_YAP1_AND_WWTR1_TAZ_STIMULATED_GENE_EXPRESSION	KEGG_NOTCH_SIGNALING_PATHWAY	0.0833333	0.233705	2.76382e-08	6.3827e-07
PID_ANGIOPOIETIN_RECEPTOR_PATHWAY	PID_SMAD2_3NUCLEAR_PATHWAY	0.06	0.230187	0.000113317	0.00193783
REACTOME_COLLAGEN_FORMATION	REACTOME_EXTRACELLULAR_MATRIX_ORGANIZATION	1	0.228679	5.62525e-10	1.45952e-08
PID_ANGIOPOIETIN_RECEPTOR_PATHWAY	KEGG_DORSO_VENTRAL_AXIS_FORMATION	0.173913	0.224617	0.000360799	0.00586704
REACTOME_YAP1_AND_WWTR1_TAZ_STIMULATED_GENE_EXPRESSION	PID_RB_1PATHWAY	0.0833333	0.219487	1.81247e-05	0.000333564
PID_RB_1PATHWAY	PID_SMAD2_3NUCLEAR_PATHWAY	0.265625	0.21775	2.39612e-12	7.23369e-11
NABA_ECM_REGULATORS	PID_ANGIOPOIETIN_RECEPTOR_PATHWAY	0.06	0.205951	5.63594e-08	1.27107e-06
KEGG_NOTCH_SIGNALING_PATHWAY	KEGG_DORSO_VENTRAL_AXIS_FORMATION	0.173913	0.200895	2.97337e-11	8.38439e-10
PID_PS1_PATHWAY	PID_SMAD2_3NUCLEAR_PATHWAY	0.130435	0.199124	4.71714e-07	9.90113e-06
REACTOME_A_TETRASACCHARIDE_LINKER_SEQUENCE_IS_REQUIRED_FOR_GAG_SYNTHESIS	REACTOME_HS_GAG_DEGRADATION	0.6	0.191405	7.81533e-11	2.14621e-09
REACTOME_GLYCOSAMINOGLYCAN_METABOLISM	REACTOME_CHONDROITIN_SULFATE_DERMATAN_SULFATE_METABOLISM	1	0.184534	0.00117113	0.0180333
NABA_ECM_REGULATORS	REACTOME_COLLAGEN_FORMATION	0.206897	0.183161	1.80649e-08	4.22713e-07
REACTOME_CHONDROITIN_SULFATE_DERMATAN_SULFATE_METABOLISM	REACTOME_CHONDROITIN_SULFATE_BIOSYNTHESIS	1	0.180222	0.00281482	0.0414225
REACTOME_CHONDROITIN_SULFATE_BIOSYNTHESIS	REACTOME_CS_DS_DEGRADATION	0.5	0.167847	0.000145454	0.00246073
PID_PS1_PATHWAY	KEGG_NOTCH_SIGNALING_PATHWAY	0.26087	0.164218	1.595e-06	3.20643e-05
REACTOME_A_TETRASACCHARIDE_LINKER_SEQUENCE_IS_REQUIRED_FOR_GAG_SYNTHESIS	REACTOME_CS_DS_DEGRADATION	0.5	0.161389	8.95554e-05	0.00154709
